# Supplementary material
Source: publisher site journal article supplement (https://www.aging-us.com/special-collections/mikhail-blagosklonny/pdf)
Supplement: Supplementary file 1 [file pdf]

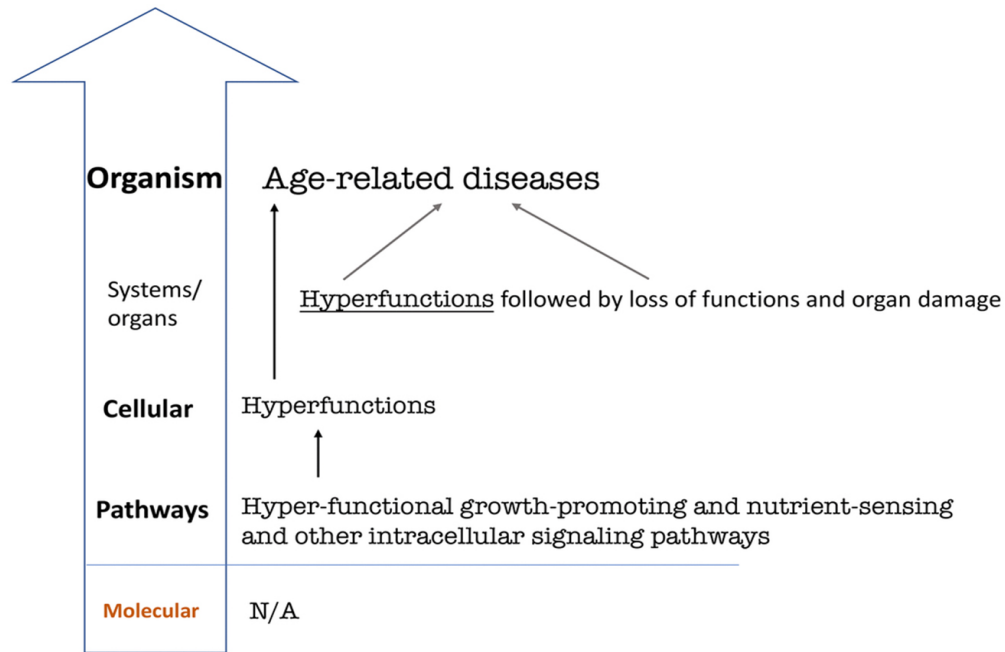

## SPECIAL COLLECTION ON MIKHAIL 'MISHA' BLAGOSKLONNY'S PUBLICATIONS IN AGING (ALBANY NY)

Figure 4: Hierarchical hallmarks of aging based on hyperfunction theory, universal from "Hallmarks of cancer and hallmarks of aging" by Mikhail Blagosklonny.

Mikhail  
Blagosklonny's  
Publications in  
Aging (Albany NY)

# AGING

# AGING

[www.aging-us.com](http://www.aging-us.com)

## EDITORIAL BOARD

### EDITORS-IN-CHIEF

[Jan Vijg](#) - Albert Einstein College of Medicine, Bronx, NY, USA

[David A. Sinclair](#) - Harvard Medical School, Boston, MA, USA

[Vera Gorbunova](#) - University of Rochester, Rochester, NY, USA

[Judith Campisi](#) - The Buck Institute for Research on Aging, Novato, CA, USA

[Mikhail V. Blagosklonny](#) - Roswell Park Cancer Institute, Buffalo, NY, USA

### EDITORIAL BOARD

[Frederick Alt](#) - Harvard Medical School, Boston, MA, USA

[Vladimir Anisimov](#) - Petrov Institute of Oncology, St.Petersburg, Russia

[Johan Auwerx](#) - Ecole Polytechnique Federale de Lausanne, Switzerland

[Andrzej Bartke](#) - Southern Illinois University, Springfield, IL, USA

[Nir Barzilai](#) - Albert Einstein College of Medicine, Bronx, NY, USA

[Elizabeth H. Blackburn](#) - University of California, San Francisco, CA, USA

[Maria Blasco](#) - Spanish National Cancer Center, Madrid, Spain

[Vilhelm A. Bohr](#) - National Institute on Aging, NIH, Baltimore, MD, USA

[William M. Bonner](#) - National Cancer Institute, NIH, Bethesda, MD, USA

[Robert M. Brosh, Jr.](#) - National Institute on Aging, NIH, Baltimore, MD, USA

[Anne Brunet](#) - Stanford University, Stanford, CA, USA

[Rafael de Caba](#) - NIA, NIH, Baltimore, MD, USA

[Ronald A. DePinho](#) - Dana-Farber Cancer Institute, Boston, MA, USA

[Jan van Deursen](#) - Mayo Clinic, Rochester, MN, USA

[Lawrence A. Donehower](#) - Baylor College of Medicine, Houston, TX, USA

[Caleb E. Finch](#) - University of Southern California, Los Angeles, CA, USA

[Toren Finkel](#) - National Institutes of Health, Bethesda, MD, USA

[Luigi Fontana](#) - Washington University, St. Louis, MO, USA

[Claudio Franceschi](#) - University of Bologna, Bologna, Italy

[David Gems](#) - Inst. of Healthy Ageing, Univ. College London, UK

[Myriam Gorospe](#) - National Institute on Aging, NIH, Baltimore, MD, USA

[Leonard Guarente](#) - MIT, Cambridge, MA, USA

[Andrei Gudkov](#) - Roswell Park Cancer Institute, Buffalo, NY, USA

[Michael Hall](#) - University of Basel, Basel, Switzerland

[Philip Hanawalt](#) - Stanford University, CA, USA

[Nissim Hay](#) - University of Illinois at Chicago, Chicago, IL, USA

[Siegfried Hekimi](#) - McGill University, Montreal, Canada

[Stephen L. Helfand](#) - Brown University, Providence, RI, USA

[Jan H.J. Hoeijmakers](#) - Erasmus MC, Rotterdam, The Netherlands

[John O. Holloszy](#) - Washington University, St. Louis, MO, USA

[Stephen P. Jackson](#) - University of Cambridge, Cambridge, UK

[Heinrich Jasper](#) - The Buck Institute for Research on Aging, Novato, CA, USA

[Pankaj Kapahi](#) - The Buck Institute for Research on Aging, Novato, CA, USA

[Jan Karlseder](#) - The Salk Institute, La Jolla, CA, USA

[Cynthia Kenyon](#) - University of California San Francisco, San Francisco, CA, USA

[James L. Kirkland](#) - Mayo Clinic, Rochester, MN, USA

[Guido Kroemer](#) - INSERM, Paris, France

[Titia de Lange](#) - Rockefeller University, New York, NY, USA

[Arnold Levine](#) - The Institute for Advanced Study, Princeton, NJ, USA

[Michael P. Lisanti](#) - University of Salford, Salford, UK

[Lawrence A. Loeb](#) - University of Washington, Seattle, WA, USA

[Valter Longo](#) - University of Southern California, Los Angeles, CA, USA

[Gerry Melino](#) - University of Rome, Rome, Italy

[Simon Melov](#) - The Buck Institute for Research on Aging, Novato, CA, USA

[Alexey Moskalev](#) - Komi Science Center of RAS, Syktyvkar, Russia

[Masashi Narita](#) - University of Cambridge, Cambridge, UK

[Andre Nussenzweig](#) - National Cancer Institute, NIH, Bethesda, MD, USA

[William C. Orr](#) - Southern Methodist University, Dallas, TX, USA

[Daniel S. Peeper](#) - The Netherlands Cancer Institute, Amsterdam, The Netherlands

[Thomas Rando](#) - Stanford University School of Medicine, Stanford, CA, USA

[Michael Ristow](#) - Swiss Federal Institute of Technology, Zurich, Switzerland

[Igor B. Roninson](#) - Ordway Research Institute, Albany, NY, USA

[Michael R. Rose](#) - University of California, Irvine, CA, USA

[K Lenhard Rudolph](#) - Hannover Medical School, Hannover, Germany

[Paolo Sassone-Corsi](#) - University of California, Irvine, CA, USA

[John Sedivy](#) - Brown University, Providence, RI, USA

[Manuel Serrano](#) - Spanish National Cancer Research Center, Madrid, Spain

[Gerald S. Shadel](#) - Yale University School of Medicine, New Haven, CT, USA

[Norman E. Sharpless](#) - University of North Carolina, Chapel Hill, NC, USA

[Vladimir P. Skulachev](#) - Moscow State University, Moscow, Russia

[Sally Temple](#) - NY Neural Stem Cell Institute, Albany, NY, USA

[George Thomas](#) - University of Cincinnati, Cincinnati, OH, USA

[Jonathan L. Tilly](#) - Massachusetts General Hospital, Boston, MA, USA

[John Tower](#) - University of Southern California, LA, CA, USA

[Eric Verdin](#) - University of California, San Francisco, CA, USA

[Thomas von Zglinicki](#) - Newcastle University, Newcastle, UK

[Alex Zhavoronkov](#) - Insilico Medicine, Baltimore, MD, USA

[Aging](#) (ISSN: 1945 - 4589) is published monthly by Impact Journals, LLC.  
6666 East Quaker St., Suite 1B, Orchard Park, NY 14127

Abstracted and/or indexed in: PubMed/Medline (abbreviated as "Aging (Albany NY)"), PubMed Central (abbreviated as "Aging (Albany NY)"), Web of Science/Science Citation Index Expanded (abbreviated as Aging-US) & listed in the Cell Biology-SCIE and Geriatrics & Gerontology category, Scopus /Rank Q1(the highest rank) (abbreviated as Aging)- Aging and Cell Biology category, Biological Abstracts, BIOSIS Previews, EMBASE, META (Chan Zuckerberg Initiative), Dimensions (Digital Science's).

This publication and all its content, unless otherwise noted, is licensed under CC-BY 3.0 Creative Commons Attribution License.  
Impact Journals, LLC meets Wellcome Trust Publisher requirements.  
IMPACT JOURNALS is a registered trademark of Impact Journals, LLC.

### **Editorial and Publishing Office Aging**

6666 E. Quaker St., Suite 1,  
Orchard Park, NY 14127  
Phone: 1-800-922-0957  
Fax: 1-716-508-8254  
e-Fax: 1-716-608-1380

### **Submission**

Please submit your manuscript on-line at <http://aging.msubmit.net>

### **Editorial**

For editorial inquiries, please call us or email [editors@impactaging.com](mailto:editors@impactaging.com)

### **Production**

For questions related to preparation of your article for publication, please call us or email [krasnova@impactaging.com](mailto:krasnova@impactaging.com)

### **Indexing**

If you have questions about the indexing status of your paper, please email [kurenova@impactaging.com](mailto:kurenova@impactaging.com)

### **Billing/Payments**

If you have questions about billing/invoicing or would like to make a payment, please call us or email [payment@impactaging.com](mailto:payment@impactaging.com)

### **Media**

If you have questions about post publication promotion, Altmetric, video interviews or social media, please email [media@impactjournals.com](mailto:media@impactjournals.com)

### **Printing**

Each issue or paper can be printed on demand. To make a printing request, please call us or email [printing@impactjournals.com](mailto:printing@impactjournals.com)

### **Publisher's Office**

Aging is published by Impact Journals, LLC

To contact the Publisher's Office, please email: [publisher@impactjournals.com](mailto:publisher@impactjournals.com), visit [www.impactjournals.com](http://www.impactjournals.com), or call 1-800-922-0957

*Aging* (ISSN: 1945 - 4589) is published twice a month by Impact Journals, LLC.  
6666 East Quaker St., Suite 1B, Orchard Park, NY 14127

**Abstracted and/or indexed in:** PubMed/Medline (abbreviated as "Aging (Albany NY)"), PubMed Central (abbreviated as "Aging (Albany NY)"), Web of Science/Science Citation Index Expanded (abbreviated as Aging-US) & listed in the Cell Biology-SCIE and Geriatrics & Gerontology category, Scopus /Rank Q1(the highest rank) (abbreviated as Aging) - Aging and Cell Biology category, Biological Abstracts, BIOSIS Previews, EMBASE, META (Chan Zuckerberg Initiative), Dimensions (Digital Science's).

This publication and all its content, unless otherwise noted, is licensed under CC-BY 3.0 Creative Commons Attribution License.

Impact Journals, LLC meets Wellcome Trust Publisher requirements.

IMPACT JOURNALS is a registered trademark of Impact Journals, LLC.

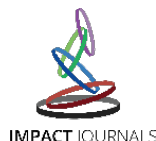

# Table of Contents

Targeted cancer therapy: the initial high concentration may slow down the selection for resistance

[Originally published in Volume 16, Issue 14 pp 11122-11124](#)

Cellular senescence: when growth stimulation meets cell cycle arrest

[Originally published in Volume 15, Issue 4 pp 905-913](#)

Are menopause, aging and prostate cancer diseases?

[Originally published in Volume 15, Issue 2 pp 298-307](#)

Hallmarks of cancer and hallmarks of aging

[Originally published in Volume 14, Issue 9 pp 4176-4187](#)

As predicted by hyperfunction theory, rapamycin treatment during development extends lifespan

[Originally published in Volume 14, Issue 5 pp 2020-2024](#)

DNA- and telomere-damage does not limit lifespan: evidence from rapamycin

[Originally published in Volume 13, Issue 3 pp 3167-3175](#)

From causes of aging to death from COVID-19

[Originally published in Volume 12, Issue 11 pp 10004-10021](#)

Rapamycin for longevity: opinion article

[Originally published in Volume 11, Issue 19 pp 8048-8067](#)

Rapamycin for the aging skin

[Originally published in Volume 11, Issue 24 pp 12822-12826](#)

Disease or not, aging is easily treatable

[Originally published in Volume 10, Issue 11 pp 3067-3078](#)

Paradoxes of senolytics

[Originally published in Volume 10, Issue 12 pp 4289-4293](#)

## Targeted cancer therapy: The initial high concentration may slow down the selection for resistance

Mikhail V. Blagosklonny

### ABSTRACT

**Unfortunately, any targeted therapy is, always, started with low levels of the drug in the organism, selecting for drug resistance. One should propose that initial drug levels must be maximized, and durations may be minimized, ideally, as portions of preemptive combination of targeted drugs.**

To ensure rapid selection of drug resistance in the cell culture, we first treat cancer cells with low drug concentrations, increasing drug concentrations over time. I hope no further explanation is needed.

In patients, treatment with targeted drugs is also mistakenly designed to expedite the selection of resistance, a fact that may shock my readers. Initially, cancer cells are exposed to low drug concentrations, which are then increased. This is achieved simply by administering the same daily dose to patients from day 1. For example, Cabozantinib is taken once daily. Cabozantinib has a long terminal plasma half-life (~120 hours) and accumulates 5-fold by day 15 with daily dosing.

I reiterate: the concentration increases 5-fold by day 15 due to its long half-life and consistent daily dosing of one tablet.

Low initial concentrations can be avoided by taking 5 tablets on the first day and then continuing with 1 tablet every week, for example. Another hypothetical regimen is 3 tablets for every 3 days and then discontinuing it. Levels of Cabozantinib remain high for the next one to two weeks (post-treatment remained activity).

Consider my case: I have multiple brain metastases driven by METex14, effectively targeted by capmatinib, the most selective and effective MET inhibitor. Capmatinib selects for resistant secondary mutations in the METex14 that can be targeted by Cabozantinib, although it is less effective and selective than capmatinib. It is possible that one of the metastases contains at least one capmatinib-resistant cell with secondary MET mutations, which could eventually make the metastasis resistant to capmatinib.

In my case, I propose using 5 tablets of Cabozantinib for 1 day every two months. Only 1 day every 2 months.

The mutant cell is exposed to relevant concentrations of Cabozantinib for one to two weeks (post-treatment remained activity).

Another example. Afatinib (EGFR/HER2-4 inhibitor) is used to treat EGFR-mutant-dependent lung cancer (it is not my case, as mine is METex14-dependent). Afatinib has a half-life of 37 hours. Steady-state is achieved within 8 days of once-daily dosing, with overall accumulation ratios of 2.0–2.7 for C max and 2.5–3.4 for AUC. Instead, we should achieve Steady-state on day 1. In some cases, the first day levels should be higher than ever further and the course of treatment may be brief.

In my case, the most common off-target mechanism of resistance involves overexpression of EGFR and HER2-4. I prefer very high dose treatment with afatinib for just 1 days in combination with capmatinib. After stopping afatinib, its levels remain high for several additional days (post-treatment remained activity), and capmatinib must continue to be used. Afatinib alone is ineffective in my case (METex14), but afatinib targets potential resistance to capmatinib. (Note: Without capmatinib, METex14-positive cells would not be killed by the off-target resistant drug. A combination of two drugs must be used, including high levels of afatinib post-treatment).

Another example: trametinib (an MEK inhibitor) is usually given 1 tablet (2 mg) every day from day 1. The estimated elimination half-life is 3.9 to 4.8 days. Trametinib accumulates with daily repeat dosing with the accumulation ratio of 6.0. Steady state was achieved by day 15. This is reminiscent of Cabozantinib.

One may suggest that steady-state-like levels (or even higher levels) may be required for the very beginning of treatment. Especially, in brief applications use. For drugs with long half-life, the drug may be given only on day 1 because high levels of the drug remain for a long time in the organism, no matter what. These are post-treatment levels and I call this the reversal level curve (Figure 1). I suggest to use reversal schedules in targeted drug combinations (Figure 2). I've depicted the schema I have used for me for very specific reasons that are beyond the topic of this editorial (My battle with cancer: exceptional chapters from part II). It is worth mentioning that inhibition of MEK and mTOR should

be used together, because rapamycin may activate MEK, and Trametinib may activate the mTOR pathway. In conclusion, to decelerate the acquisition of drug resistance, targeted therapy must immediately target the tumor at a higher than steady-state drug concentration. The courses may be brief, if the doses are high, but that

is a topic for another story. Importantly, as previously discussed, targeted drugs should be used in appropriate combinations [1, 2].

Starting treatment with a higher dose is common in medicine. For instance, starting with high doses is typical for antibacterial antibiotics to avoid resistance.

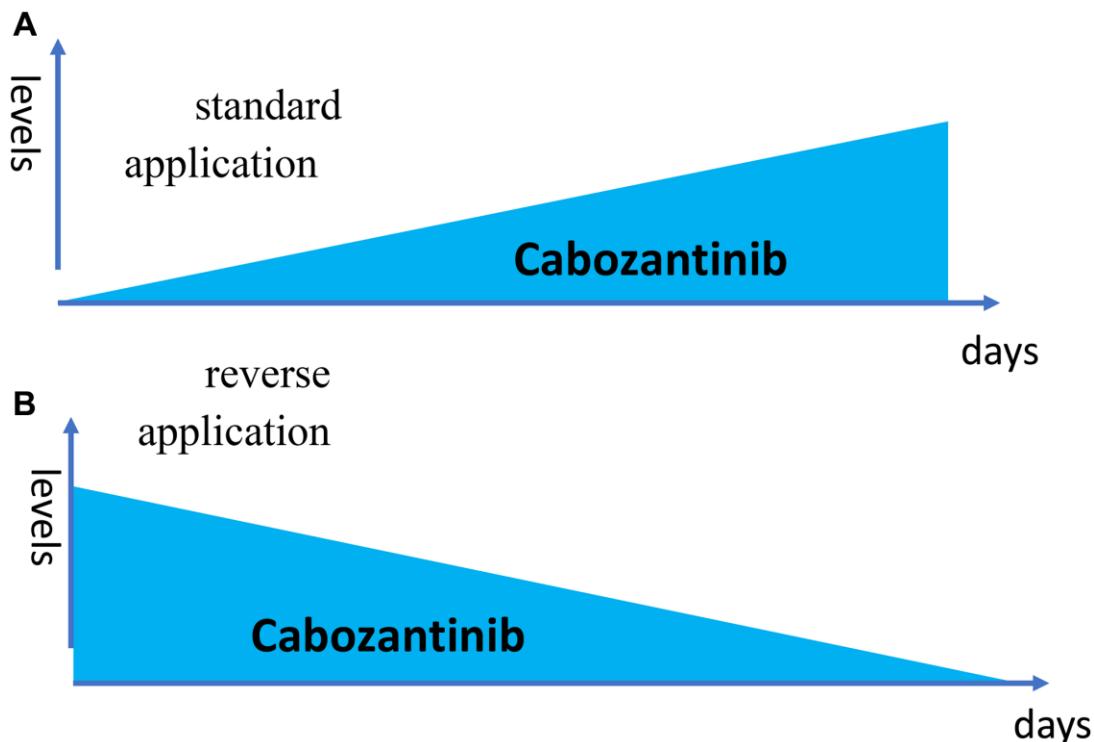

**Figure 1. Reverse dose application.** (A) The drug is given every day 1 tablets. (B) The drug is given on day 1 only 6 tablets (just one as an example).

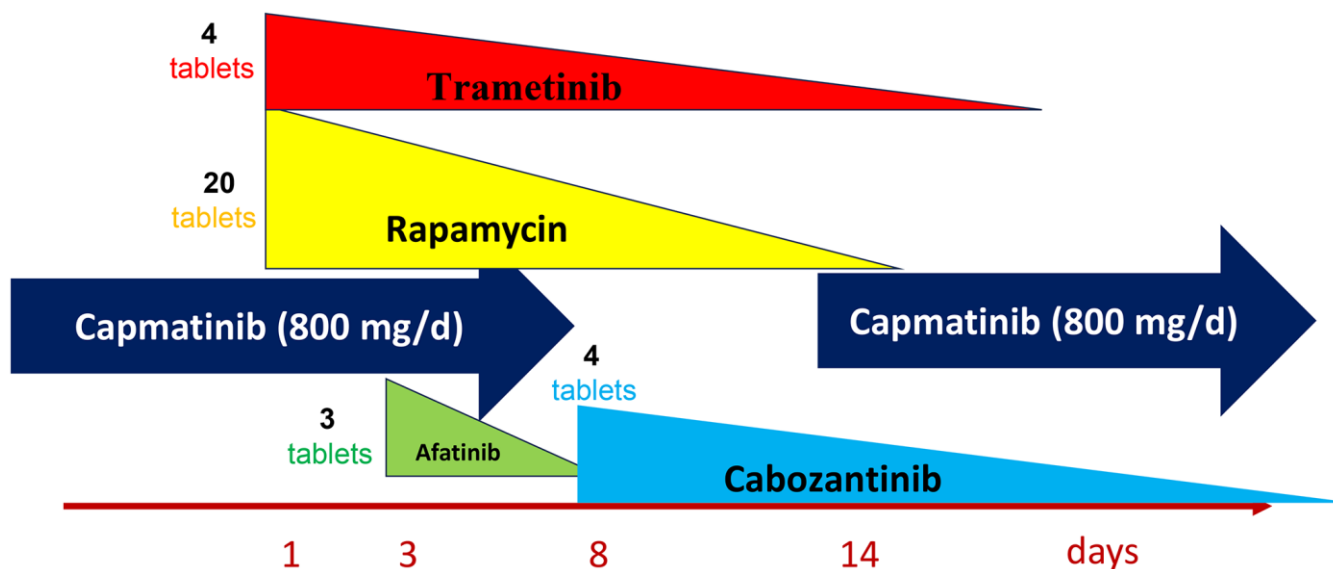

**Figure 2. One of my targeted combinations.** Capmatinib – standard everyday use. All other medications - reverse dose application -are given on day 1 only. The number of tablets on day1 are shown.



Often, antibiotics are used at double (or higher) doses on the first day, as a high single dose, or even intravenously.

Also, rapamycin is given at a loading dose on the first day, which is three times higher than the maintenance dose in organ transplant patients. For another example, dexamethasone is often started with a load.

## Appendix

**“My battle with cancer. Part 1.” Oncoscience. 2024 Jan 3; 11: 1-14.**

### Abstract:

In January 2023, diagnosed with numerous metastases of lung cancer in my brain, I felt that I must accomplish a mission. If everything happens for a reason, my cancer, in particular, I must find out how metastatic cancer can be treated with curative intent. This is my mission now, and the reason I was ever born. In January 2023, I understood the meaning of life, of my life. I was born to write this article. In this article, I argue that monotherapy with targeted drugs, even when used in sequence, cannot cure metastatic cancer. However, preemptive combinations of targeted drugs may, in theory, cure incurable cancer.

<https://www.ncbi.nlm.nih.gov/pmc/articles/PMC10765422/>

**Forthcoming “My battle with cancer: exceptional chapters from part II.”**

### Abstract:

For a divine reason, I was destined for cancer with multiple brain metastases: to create the book “My Battle with Cancer,” a far-reaching endeavor for which I was born. Surprisingly to others, I experience moments—no, entire days—of happiness and joy. My journey through cancer, as both a patient and a researcher, has gifted me insights into cancer cures, born from a mind that remains active, often even in sleep. Unfortunately, one thing happened on May 20, 2024, hurting me, but this is not a part of this book. Nevertheless, I am finishing the book with the hope of increasing the lifespan to the normal duration for future incurable cancer patients. Among other topics, I propose preemptive combinations of targeted drugs to prevent resistance to the key cancer driver and thus sustain long-lasting remission; classification of targeted combinations; intermittent targeting; reverse dose applications; increasing targeting of brain metastases; and the harmful effects of standard WBRT, Avastin, and immunotherapy-induced hyperprogression.

## REFERENCES

1. Blagosklonny MV. Oncoscience. 2024; 11:1–14.  
<https://doi.org/10.18632/oncoscience.593>

PMID:[38188499](https://pubmed.ncbi.nlm.nih.gov/38188499/)

2. Blagosklonny MV. Oncotarget. 2024; 15:232–37.  
<https://doi.org/10.18632/oncotarget.28569>  
PMID:[38497774](https://pubmed.ncbi.nlm.nih.gov/38497774/)

**Mikhail V. Blagosklonny:** Roswell Park Comprehensive Cancer Center, Buffalo, NY 14263, USA

**Correspondence:** Mikhail V. Blagosklonny

**Email:** [Blagosklonny@oncotarget.com](mailto:Blagosklonny@oncotarget.com),  
[Blagosklonny@rapalogs.com](mailto:Blagosklonny@rapalogs.com)

**Keywords:** lung cancer, resistance, brain metastases, METex14, capmatinib, rapamycin

**Conflicts of Interest:** The author declares no conflicts of interest related to this study

**Funding:** No funding was used for this paper

**Copyright:** © 2024 Blagosklonny. This is an open access article distributed under the terms of the [Creative Commons Attribution License](https://creativecommons.org/licenses/by/4.0/) (CC BY 4.0), which permits unrestricted use, distribution, and reproduction in any medium, provided the original author and source are credited

**Received:** July 5, 2024

**Published:** July 28



# Cellular senescence: when growth stimulation meets cell cycle arrest

Mikhail V. Blagosklonny<sup>1</sup>

<sup>1</sup>Roswell Park Comprehensive Cancer Center, Buffalo, NY 14263, USA

**Correspondence to:** Mikhail V. Blagosklonny; **email:** [Blagosklonny@oncotarget.com](mailto:Blagosklonny@oncotarget.com), [Blagosklonny@rapalogs.com](mailto:Blagosklonny@rapalogs.com)

**Keywords:** rapamycin, mTOR, hyperfunction theory of aging, cell volume and enlargement, gerogenic conversion

**Received:** December 1, 2022

**Accepted:** February 16, 2023

**Published:** February 19, 2023

**Copyright:** © 2023 Blagosklonny. This is an open access article distributed under the terms of the [Creative Commons Attribution License](https://creativecommons.org/licenses/by/3.0/) (CC BY 3.0), which permits unrestricted use, distribution, and reproduction in any medium, provided the original author and source are credited.

## ABSTRACT

**At the very moment of cell-cycle arrest, the cell is not senescent yet. For several days in cell culture, the arrested cell is acquiring a senescent phenotype. What is happening during this geroconversion? Cellular enlargement (hypertrophy) and hyperfunctions (lysosomal and hyper-secretory) are hallmarks of geroconversion.**

## Epigraph

*“Growth stimulation leads to cellular senescence when the cell cycle is blocked” [1].*

## Arrest is not yet senescence

Not anything that causes arrest causes senescence. For example, serum withdrawal, contact inhibition, nutrient starvation and rapamycin cause reversible arrest (quiescence) instead of senescence. What these conditions have in common is that they inhibit cellular mass or volume growth and specifically inhibit the mTOR pathway. (Of note: in the cell culture, quiescent cells will eventually succumb to senescence, because even rapamycin does not suppress geroconversion completely).

To induce senescence, DNA-damaging agents p21 and p16 cause cell-cycle arrest. Freshly arrested cells do not have senescent phenotype. During several days, the arrested cells acquire a large, flat morphology, beta-Gal positivity and Senescence-Associated Secretory Phenotype (SASP) [2–4]. The acquisition of senescent phenotype in arrested cells is known as gerogenic conversion or geroconversion [4–8].

Geroconversion is a continuation of cellular growth, when the cell cycle is blocked [1]. It may also partially occur in proliferating cells and is overstimulated in cell

culture conditions. Cellular mass (volume) growth is driven in part by growth-promoting pathways such as mTOR [6]. And this is how the anti-aging activity of rapamycin was predicted, before life-extension was shown in animals [9].

Despite the obvious (acquisition of senescent phenotype takes time via active process), the existence of geroconversion is largely ignored by scientific community. One of the reasons is that in cell culture, geroconversion occurs automatically, unless actively prevented by rapamycin, serum and nutrient withdrawal, contact inhibition, severe hypoxia and some other factors (discussed later). In 2011, it was pointed out that “In cell culture, cell cycle arrest typically leads to senescence, because the cell is overstimulated by serum, nutrients, oncogenes and so on. Therefore, cell cycle arrest is sufficient to cause senescence, especially in cancer cells. This is why arrest of cell cycle is confused with senescence” [10].

## Growth stimulation drives senescence during cell cycle arrest

Nutrients, mitogens or growth factors (GF), hormones (e.g., insulin and testosterone), cytoplasmic oncoproteins, oxygen and other factors stimulate growth-promoting pathways such as mTOR and MAPK, which stimulate both cellular mass growth, cyclin D induction and cell cycle progression. In the

absence of growth stimulation (e.g., GF or serum withdrawal), MAPK and mTOR are deactivated. This slows down both cellular mass growth and cell cycle progression, and the cell becomes quiescent. Re-addition of growth factors allows quiescent cells to re-start proliferation [5, 6].

In proliferating cells, mTOR drives cellular mass growth, and this growth in cell size is balanced by cell division (Figure 1A). In quiescent cells, mTOR is deactivated, and the cell cycle is arrested. What would happen if the cell cycle were arrested, but mTOR is still active?

This condition can be caused by induction of CDK inhibitors (p21 and p16), which block the cell cycle, without affecting growth-promoting pathways such as mTOR and MAPK [6].

When the cell cycle is arrested by p21/p16, then mTOR drives growth in the absence of cell division, causing cellular hypertrophy (a large, flat cell morphology), lysosomal hyperfunction (beta-Gal-staining) and other hyperfunctions such as SASP (Figure 1B). It also increases tissue-specific hyperfunctions [6, 11].

Overactivated mTOR causes compensatory resistance to growth factors and insulin, via the pS6K1/IRS feedback loop [12, 13].

In cell culture, p21 and p16 cause cell-cycle arrest fast, but, at the moment of the arrest, the cells are not yet

senescent. During the next 3–5 days, the arrested cells acquire the senescent phenotype [2–4]. This process is called geroconversion.

In a typical cell culture, cells are overstimulated by nutrients, serum and oxygen and grow in low cell density, making mTOR maximally active. For example, DMEM contains 5-fold higher than normal blood levels of glucose, higher than even in diabetic patients [13]. This is why it is sufficient to induce cell cycle arrest to induce senescence, unless mTOR-driven geroconversion is actively suppressed by serum withdrawal and contact inhibition, which deactivate mTOR [5, 14].

### Pseudo-DNA-damage response in senescent cells

Molecular damage is not required for geroconversion (like it is not required for growth). For example, p21 and p16 (CDK inhibitors) and cause cell-cycle arrest without causing DNA damage: p21 and p16 directly bind to CDKs to arrest cell cycle. Then still active mTOR, MAPK and other growth-promoting pathways convert this arrest to senescence (geroconversion).

During geroconversion, overactivated kinases such as ATM phosphorylate H2AX, even in the absence of DNA damage [15]. As suggested by Rybak et al. [16] although DNA double-strand breaks always induce  $\gamma$ H2AX, the reverse is not true:  $\gamma$ H2AX is not an unequivocal marker of these breaks [16–18].

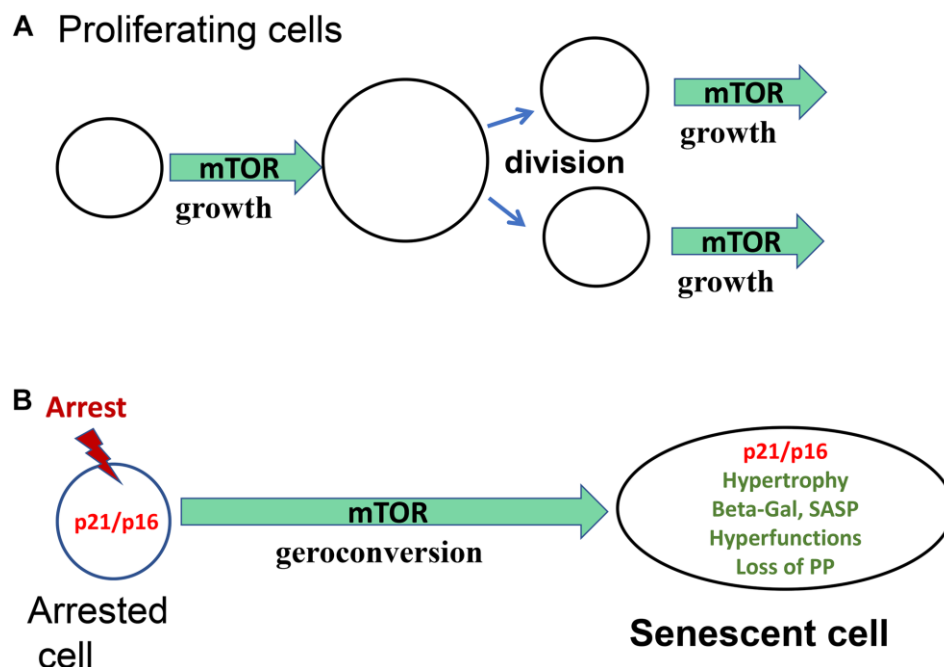

**Figure 1. Geroconversion as a form of growth. (A)** Proliferating cells. Cellular enlargement (growth) is followed by cell division. mTOR is shown as one of the drivers of growth. **(B)** Arrested cells. In the arrest cell (p21 and p16) cellular enlargement is followed by cell division. mTOR is shown as one of the drivers of geroconversion.

So, detection of  $\gamma$ H2AX indicates that the cell may be senescent but does not indicate that it is necessarily caused by DNA damage. Unfortunately, it is not known to most scientists.

### Acute DNA damage can cause arrest, but it's not yet senescence

Acute DNA damage by radiation and DNA-damaging drugs activates DNA damage response (DDR). While DNA damage response (DDR) causes cell-cycle arrest, it is growth-promoting pathways such as mTOR that convert this arrest to senescent phenotype. (Figure 1B).

[Note: Life-long, gradual accumulation of DNA damage (accumulation of mutations) does not lead to cell-cycle arrest, but, in contrast, contributes to unlimited proliferation, robustness and immortality in cancer cells].

Once again, acute DNA damage or DDR in proliferating cells can lead to cellular senescence, because proliferating is associated with high activity of growth-promoting pathways necessary for geroconversion. When DDR causes arrest, these growth-promoting pathways drive geroconversion [19]. In serum-starved quiescent cells, mTOR is inactive and DNA damage cannot cause senescence. Growth stimulation with serum then drives geroconversion [19].

In the organism, acute DNA damage, or DDR, can lead to cell senescence by arresting proliferating cells. This is an age-independent cellular senescence that may occur at any age. This is also called non-adaptive cell senescence [20].

In contrast, age-dependent cellular senescence may be driven by life-long hyperfunction of growth-promoting pathways, especially in arrested (post-mitotic) cells.

### Proliferative potential

At first, the freshly arrested cells retain proliferative potential (PP) and can re-start proliferation, if cell-cycle arrest is lifted. Following geroconversion, senescent cells cannot proliferate, even when cell-cycle arrest is lifted. The senescent cell may re-enter the cell cycle but cannot progress further or die in mitosis [2–4]. Loss of PP is a marker of the senescent phenotype, and rapamycin partially prevents loss of PP, as it partially prevents other markers of senescent phenotype such as cell hypertrophy, beta-Gal and SASP. Proliferative potential should not be confused with proliferation. For example, rapamycin inhibits proliferation but preserves PP. When p16 and p21 were induced for one day and then switched off, the cells resumed proliferation. If p16

was switched off after six days, cells remained phenotypically senescent and could not restart proliferation [2, 3]. Serum starvation [1, 19, 21] and mTOR inhibitors [1, 4, 22], prevent loss of PP during arrest, caused by switchable p21/p16 and the synthetic CDK4/6 inhibitor Palbociclib (PD0332991).

The irreversibility of cell cycle arrest should not be confused with Loss of PP. For example, Doxorubicin, a DNA-damaging drug, can render cell-cycle arrest irreversible, because doxorubicin cannot be easily washed out from the cell. If arrest is irreversible, it is impossible to know whether the cell retained (or not) the proliferative potential.

### Cell hypertrophy (enlargement) as a marker of senescence

The large senescent morphology is the most noticeable feature of senescence in cell culture [23] and in the organism [24]. And it is not coincidental. Geroconversion is a continuation (quasi-program) of cellular growth [25]. At the beginning of geroconversion in p21-arrested cells, cellular mass (protein per well) is increased exponentially, and then growth becomes linear in p21-arrested cells [26]. In agreement, Neurohr et al. showed that within 9 days after doxorubicin-induced arrest, cell size increased linearly 8-fold [21]. Similarly, linear increase in cell volume was observed during arrest caused by the CDKi Palbociclib, and this increase was completely prevented by serum starvation [21]. Rapamycin partially decreases hypertrophy during cell-cycle arrest caused by either p21 or synthetic CDK inhibitors [4, 26]. Pan-mTOR inhibitors more potently suppressed hypertrophy than rapamycin [27, 28].

Thus, hypertrophy is only partially rapamycin-sensitive [26, 27].

### Excessive cell growth as a marker of geroconversion

Geroconversion can occur not only in arrested but also in proliferating cells, if growth stimulation is excessive. For example, stem cells are small, and their size is increased with aging [29], and excessive growth stimulation drives stem cell geroconversion [7, 8].

It was even suggested that an increase in cell size by itself can cause senescence [21, 29, 30]. According to the geroconversion concept, excessive activation of growth-promoting pathways (MAPK, mTOR, etc.) drives both excessive growth and other hyperfunctions (SASP, lysosomal hyperfunction (beta-Gal), hyperdifferentiation). Furthermore, overactivated MAPK and

mTOR pathways may induce p53/p21 and cycle arrest [31]. Following cell-cycle arrest, growth becomes even more excessive. Excessive growth and other manifestations of geroconversion are difficult to dissociate, because the manipulations that decrease growth (serum/nutrient starvation, rapamycin) also block MAPK/mTOR network that drives ALL manifestations together. This may suggest that cell size drives senescence rather than hyperfunctional growth-signaling drives senescence-associated hypertrophy. As suggested, excessive mitogen/growth-stimulation may lead to hypermitogenic arrest [32] and then full-blown cell senescence [9, 31].

### Geroconversion as terminal differentiation

Geroconversion can also be viewed as hypertrophic differentiation. For example, chondrocytes, responsible for bone growth in length, become hypertrophic and undergo senescence [33–36]. Like geroconversion, terminal differentiation is an active process associated with decrease of proliferative potential [37], possible beta-Gal-positivity [38] as well as hypertrophy [39, 40] and increase of cellular functions, mainly tissue-specific functions. **Geroconversion can be called gerogenic differentiation.** This topic links the organismal/body growth program, hypertrophic differentiation, and geroconversion as a quasi-program of cellular growth and developmentally programmed cellular senescence [20].

### Developmentally programmed cell senescence

While cell senescence is a quasi-programmed in aging, it may be programmed in development [20, 41–45]. During mammalian embryonic development, senescent cells are cleared by macrophages, resulting in tissue remodeling [41].

### Oncogene-induced senescence

Hyper-mitogenic stimulation may trigger cell-cycle arrest and simultaneously promote size growth [32, 46–49].

### How should we define cellular senescence?

Cellular senescence is neither functional decline nor caused by chronic accumulation of molecular damage. In contrast, cellular senescence is characterized by universal hyperfunctions such as SASP plus tissue-specific hyperfunctions (senescent beta-cells as an example). Second, whether accumulation of molecular damages (mutations) lead to cancer, cancer cells tend to be immortal. A common definition of cellular senescence as permanent loss of proliferative potential does not recapitulate the most important features of

the senescent phenotype, such as hypertrophy and hyperfunctions (e.g., SASP).

Cell senescence is a proliferation-like state in non-proliferating cells. Growth-promoting pathways, including mTOR and MEK/MAPK, drive both growth and geroconversion. When actual growth is completed, growth-promoting pathways drive cellular senescence (Figure 1). Thus, a program of growth becomes a quasi-program of senescence. (Quasi- means pseudo- or “resembling but not real”). Senescent cells resemble proliferating cells but do not proliferate [5]. As “Growth stimulation leads to cellular senescence when the cell cycle is blocked” the molecular hallmark of senescent cells is presented: high levels of p21/p16, phospho-S6 and cyclin D1 [50]. Cell senescence is associated with constitutive, proliferative-like activity of nutrient-sensing and growth-promoting pathways such as mTOR in non-proliferative (arrested) cells.

David Gems and Carina Kern suggested replacing the term cellular senescence with remodeling activation, and SASP with RASP [20]. The key word is activation. According to hyperfunction theory, cellular senescence (or remodeling activation) can be viewed as hyperactivation, hyperfunction, hypertrophy, hyper-differentiation.

In 2003, I proposed “that simultaneous stimulation of mitogen-activated pathways and downstream inhibition of cyclin-dependent kinases leads, ultimately, to cell senescence” [32]. In other words, senescence occurs when growth stimulation meets cell cycle arrest. In agreement, Rapamycin and other rapalogs (Everolimus and Ridaforolimus), pan-mTOR inhibitors [27, 28] and, to a lesser extent, MEK, PI3K, mdm-2 and S6K inhibitors all slow down geroconversion in mammalian cells [1, 22, 26, 51–55].

Numerous studies further confirmed that mTOR is involved in the senescence phenotype [56–69].

**Regardless of whether cellular senescence contributes to organismal aging or not, the geroconversion cell culture model is a prototype of the hyperfunction theory of quasi-programmed aging.** The geroconversion model introduces the notion of a quasi-program of growth and hyperfunction. Regardless of mechanistic link (or its absence) between cellular senescence and organismal aging, they are analogies. The same pathways that drive geroconversion are involved in organismal aging and age-related diseases. The same drugs that slow down geroconversion also extend lifespan, as tested in animals so far. Targets of gerostatics (e.g., mTOR, PI3K) are involved in aging of animals from worm to mammals. Therefore, gerostatics are anti-aging drugs.

The model of geroconversion is useful to discover anti-aging drugs.

## Organismal aging as quasi-program of developmental growth

Like geroconversion is a continuation of cellular growth, the organismal aging is a continuation of developmental growth (see Figure 1 in reference [70]). Aging is not programmed, it is quasi-programmed. A quasi-program is a purposeless continuation of programs that were not turned off upon their completion. This has been discussed in detail [9, 50, 71–75].

Growth and aging are driven by overlapping signaling pathways. As suggested in 2007, “mTOR stands out because (a) it is a hub in the signaling network, (b) it is conserved from plants to animals (c) its inhibitors, rapamycin (Sirolimus) and everolimus, are clinically available drugs” [76]. To be clinically useful, the hyperfunction theory is mTOR-centric.

## CONFLICTS OF INTEREST

The author declares no conflicts of interest related to this study.

## REFERENCES

1. Demidenko ZN, Blagosklonny MV. Growth stimulation leads to cellular senescence when the cell cycle is blocked. *Cell Cycle*. 2008; 7:3355–61. <https://doi.org/10.4161/cc.7.21.6919> PMID:18948731
2. Dai CY, Enders GH. p16 INK4a can initiate an autonomous senescence program. *Oncogene*. 2000; 19:1613–22. <https://doi.org/10.1038/sj.onc.1203438> PMID:10763818
3. Chang BD, Broude EV, Fang J, Kalinichenko TV, Abdryashitov R, Poole JC, Roninson IB. p21Waf1/Cip1/Sdi1-induced growth arrest is associated with depletion of mitosis-control proteins and leads to abnormal mitosis and endoreduplication in recovering cells. *Oncogene*. 2000; 19:2165–70. <https://doi.org/10.1038/sj.onc.1203573> PMID:10815808
4. Leontieva OV, Blagosklonny MV. CDK4/6-inhibiting drug substitutes for p21 and p16 in senescence: duration of cell cycle arrest and MTOR activity determine geroconversion. *Cell Cycle*. 2013; 12:3063–9. <https://doi.org/10.4161/cc.26130> PMID:23974099
5. Blagosklonny MV. Rapamycin, proliferation and geroconversion to senescence. *Cell Cycle*. 2018; 17:2655–65. <https://doi.org/10.1080/15384101.2018.1554781> PMID:30541374
6. Blagosklonny MV. Cell senescence, rapamycin and hyperfunction theory of aging. *Cell Cycle*. 2022; 21:1456–67. <https://doi.org/10.1080/15384101.2022.2054636> PMID:35358003
7. Sousa-Victor P, Gutarra S, García-Prat L, Rodríguez-Ubreva J, Ortet L, Ruiz-Bonilla V, Jardí M, Ballestar E, González S, Serrano AL, Perdiguero E, Muñoz-Cánoves P. Geriatric muscle stem cells switch reversible quiescence into senescence. *Nature*. 2014; 506:316–21. <https://doi.org/10.1038/nature13013> PMID:24522534
8. Sousa-Victor P, Perdiguero E, Muñoz-Cánoves P. Geroconversion of aged muscle stem cells under regenerative pressure. *Cell Cycle*. 2014; 13:3183–90. <https://doi.org/10.4161/15384101.2014.965072> PMID:25485497
9. Blagosklonny MV. Aging and immortality: quasi-programmed senescence and its pharmacologic inhibition. *Cell Cycle*. 2006; 5:2087–102. <https://doi.org/10.4161/cc.5.18.3288> PMID:17012837
10. Blagosklonny MV. Cell cycle arrest is not senescence. *Aging (Albany NY)*. 2011; 3:94–101. <https://doi.org/10.18632/aging.100281> PMID:21297220
11. Helman A, Klochendler A, Azazmeh N, Gabai Y, Horwitz E, Anzi S, Swisa A, Condiotti R, Granit RZ, Nevo Y, Fixler Y, Shreibman D, Zamir A, et al. p16(Ink4a)-induced senescence of pancreatic beta cells enhances insulin secretion. *Nat Med*. 2016; 22:412–20. <https://doi.org/10.1038/nm.4054> PMID:26950362
12. Shah OJ, Wang Z, Hunter T. Inappropriate activation of the TSC/Rheb/mTOR/S6K cassette induces IRS1/2 depletion, insulin resistance, and cell survival deficiencies. *Curr Biol*. 2004; 14:1650–6. <https://doi.org/10.1016/j.cub.2004.08.026> PMID:15380067
13. Leontieva OV, Demidenko ZN, Blagosklonny MV. Rapamycin reverses insulin resistance (IR) in high-glucose medium without causing IR in normoglycemic medium. *Cell Death Dis*. 2014; 5:e1214. <https://doi.org/10.1038/cddis.2014.178> PMID:24810050
14. Leontieva OV, Demidenko ZN, Blagosklonny MV. Contact inhibition and high cell density deactivate the



- mammalian target of rapamycin pathway, thus suppressing the senescence program. *Proc Natl Acad Sci U S A*. 2014; 111:8832–7.  
<https://doi.org/10.1073/pnas.1405723111>  
PMID:24889617
15. Pospelova TV, Demidenko ZN, Bukreeva EI, Pospelov VA, Gudkov AV, Blagosklonny MV. Pseudo-DNA damage response in senescent cells. *Cell Cycle*. 2009; 8:4112–8.  
<https://doi.org/10.4161/cc.8.24.10215>  
PMID:19946210
  16. Rybak P, Hoang A, Bujnowicz L, Bernas T, Berniak K, Zarębski M, Darzynkiewicz Z, Dobrucki J. Low level phosphorylation of histone H2AX on serine 139 (γH2AX) is not associated with DNA double-strand breaks. *Oncotarget*. 2016; 7:49574–87.  
<https://doi.org/10.18632/oncotarget.10411>  
PMID:27391338
  17. Oricchio E, Saladino C, Iacovelli S, Soddu S, Cundari E. ATM is activated by default in mitosis, localizes at centrosomes and monitors mitotic spindle integrity. *Cell Cycle*. 2006; 5:88–92.  
<https://doi.org/10.4161/cc.5.1.2269>  
PMID:16319535
  18. Pankotai T, Hoffbeck AS, Boumendil C, Soutoglou E. DNA damage response in the absence of DNA lesions continued. *Cell Cycle*. 2009; 8:4025–6.  
PMID:19959935
  19. Leontieva OV, Blagosklonny MV. DNA damaging agents and p53 do not cause senescence in quiescent cells, while consecutive re-activation of mTOR is associated with conversion to senescence. *Aging (Albany NY)*. 2010; 2:924–35.  
<https://doi.org/10.18632/aging.100265>  
PMID:21212465
  20. Gems D, Kern CC. Is "cellular senescence" a misnomer? *Geroscience*. 2022; 44:2461–9.  
<https://doi.org/10.1007/s11357-022-00652-x>  
PMID:36068483
  21. Neurohr GE, Terry RL, Lengfeld J, Bonney M, Brittingham GP, Moretto F, Miettinen TP, Vaites LP, Soares LM, Paulo JA, Harper JW, Buratowski S, Manalis S, et al. Excessive Cell Growth Causes Cytoplasm Dilution And Contributes to Senescence. *Cell*. 2019; 176:1083–97.e18.  
<https://doi.org/10.1016/j.cell.2019.01.018>  
PMID:30739799
  22. Demidenko ZN, Zubova SG, Bukreeva EI, Pospelov VA, Pospelova TV, Blagosklonny MV. Rapamycin decelerates cellular senescence. *Cell Cycle*. 2009; 8:1888–95.  
<https://doi.org/10.4161/cc.8.12.8606>  
PMID:19471117
  23. Polymenis M, Kennedy BK. Unbalanced Growth, Senescence and Aging. *Adv Exp Med Biol*. 2017; 1002:189–208.  
[https://doi.org/10.1007/978-3-319-57127-0\\_8](https://doi.org/10.1007/978-3-319-57127-0_8)  
PMID:28600787
  24. Biran A, Zada L, Abou Karam P, Vadai E, Roitman L, Ovadya Y, Porat Z, Krizhanovsky V. Quantitative identification of senescent cells in aging and disease. *Aging Cell*. 2017; 16:661–71.  
<https://doi.org/10.1111/acer.12592>  
PMID:28455874
  25. Blagosklonny MV, Hall MN. Growth and aging: a common molecular mechanism. *Aging (Albany NY)*. 2009; 1:357–62.  
<https://doi.org/10.18632/aging.100040>  
PMID:20157523
  26. Demidenko ZN, Blagosklonny MV. Quantifying pharmacologic suppression of cellular senescence: prevention of cellular hypertrophy versus preservation of proliferative potential. *Aging (Albany NY)*. 2009; 1:1008–16.  
<https://doi.org/10.18632/aging.100115>  
PMID:20157583
  27. Leontieva OV, Blagosklonny MV. Gerosuppression by pan-mTOR inhibitors. *Aging (Albany NY)*. 2016; 8:3535–51.  
<https://doi.org/10.18632/aging.101155>  
PMID:28077803
  28. Walters HE, Deneka-Hannemann S, Cox LS. Reversal of phenotypes of cellular senescence by pan-mTOR inhibition. *Aging (Albany NY)*. 2016; 8:231–44.  
<https://doi.org/10.18632/aging.100872>  
PMID:26851731
  29. Lengfeld J, Cheng CW, Maretich P, Blair M, Hagen H, McReynolds MR, Sullivan E, Majors K, Roberts C, Kang JH, Steiner JD, Miettinen TP, Manalis SR, et al. Cell size is a determinant of stem cell potential during aging. *Sci Adv*. 2021; 7:eabk0271.  
<https://doi.org/10.1126/sciadv.abk0271>  
PMID:34767451
  30. Lanz MC, Zatulovskiy E, Swaffer MP, Zhang L, Ilterten I, Zhang S, You DS, Marinov G, McAlpine P, Elias JE, Skotheim JM. Increasing cell size remodels the proteome and promotes senescence. *Mol Cell*. 2022; 82:3255–69.e8.  
<https://doi.org/10.1016/j.molcel.2022.07.017>  
PMID:35987199
  31. Blagosklonny MV. Cell senescence: hypertrophic arrest beyond the restriction point. *J Cell Physiol*. 2006; 209:592–7.  
<https://doi.org/10.1002/jcp.20750>  
PMID:17001692

32. Blagosklonny MV. Cell senescence and hypermitogenic arrest. *EMBO Rep.* 2003; 4:358–62.  
<https://doi.org/10.1038/sj.embor.embor806>  
PMID: [12671679](https://pubmed.ncbi.nlm.nih.gov/12671679/)
33. Nilsson O, Baron J. Fundamental limits on longitudinal bone growth: growth plate senescence and epiphyseal fusion. *Trends Endocrinol Metab.* 2004; 15:370–4.  
<https://doi.org/10.1016/j.tem.2004.08.004>  
PMID: [15380808](https://pubmed.ncbi.nlm.nih.gov/15380808/)
34. Forcinito P, Andrade AC, Finkelstein GP, Baron J, Nilsson O, Lui JC. Growth-inhibiting conditions slow growth plate senescence. *J Endocrinol.* 2011; 208:59–67.  
<https://doi.org/10.1677/JOE-10-0302>  
PMID: [20974641](https://pubmed.ncbi.nlm.nih.gov/20974641/)
35. Dreier R. Hypertrophic differentiation of chondrocytes in osteoarthritis: the developmental aspect of degenerative joint disorders. *Arthritis Res Ther.* 2010; 12:216.  
<https://doi.org/10.1186/ar3117>  
PMID: [20959023](https://pubmed.ncbi.nlm.nih.gov/20959023/)
36. Hallett SA, Ono W, Ono N. The hypertrophic chondrocyte: To be or not to be. *Histol Histopathol.* 2021; 36:1021–36.  
<https://doi.org/10.14670/HH-18-355>  
PMID: [34137454](https://pubmed.ncbi.nlm.nih.gov/34137454/)
37. Minoo P, Sullivan W, Solomon LR, Martin TE, Toft DO, Scott RE. Loss of proliferative potential during terminal differentiation coincides with the decreased abundance of a subset of heterogeneous ribonuclear proteins. *J Cell Biol.* 1989; 109:1937–46.  
<https://doi.org/10.1083/jcb.109.5.1937>  
PMID: [2808514](https://pubmed.ncbi.nlm.nih.gov/2808514/)
38. Untergasser G, Gander R, Rumpold H, Heinrich E, Plas E, Berger P. TGF-beta cytokines increase senescence-associated beta-galactosidase activity in human prostate basal cells by supporting differentiation processes, but not cellular senescence. *Exp Gerontol.* 2003; 38:1179–88.  
<https://doi.org/10.1016/j.exger.2003.08.008>  
PMID: [14580871](https://pubmed.ncbi.nlm.nih.gov/14580871/)
39. Ding L, Yin Y, Han L, Li Y, Zhao J, Zhang W. TSC1-mTOR signaling determines the differentiation of islet cells. *J Endocrinol.* 2017; 232:59–70.  
<https://doi.org/10.1530/JOE-16-0276>  
PMID: [27754935](https://pubmed.ncbi.nlm.nih.gov/27754935/)
40. Facchini A, Borzì RM, Olivetto E, Platano D, Pagani S, Cetrullo S, Flamigni F. Role of polyamines in hypertrophy and terminal differentiation of osteoarthritic chondrocytes. *Amino Acids.* 2012; 42:667–78.  
<https://doi.org/10.1007/s00726-011-1041-9>  
PMID: [21814786](https://pubmed.ncbi.nlm.nih.gov/21814786/)
41. Muñoz-Espín D, Cañamero M, Maraver A, Gómez-López G, Contreras J, Murillo-Cuesta S, Rodríguez-Baeza A, Varela-Nieto I, Ruberte J, Collado M, Serrano M. Programmed cell senescence during mammalian embryonic development. *Cell.* 2013; 155:1104–18.  
<https://doi.org/10.1016/j.cell.2013.10.019>  
PMID: [24238962](https://pubmed.ncbi.nlm.nih.gov/24238962/)
42. Storer M, Mas A, Robert-Moreno A, Pecoraro M, Ortells MC, Di Giacomo V, Yosef R, Pilpel N, Krizhanovsky V, Sharpe J, Keyes WM. Senescence is a developmental mechanism that contributes to embryonic growth and patterning. *Cell.* 2013; 155:1119–30.  
<https://doi.org/10.1016/j.cell.2013.10.041>  
PMID: [24238961](https://pubmed.ncbi.nlm.nih.gov/24238961/)
43. Davaapil H, Brockes JP, Yun MH. Conserved and novel functions of programmed cellular senescence during vertebrate development. *Development.* 2017; 144:106–14.  
<https://doi.org/10.1242/dev.138222>  
PMID: [27888193](https://pubmed.ncbi.nlm.nih.gov/27888193/)
44. Da Silva-Álvarez S, Guerra-Varela J, Sobrido-Cameán D, Quelle A, Barreiro-Iglesias A, Sánchez L, Collado M. Developmentally-programmed cellular senescence is conserved and widespread in zebrafish. *Aging (Albany NY).* 2020; 12:17895–901.  
<https://doi.org/10.18632/aging.103968>  
PMID: [32991320](https://pubmed.ncbi.nlm.nih.gov/32991320/)
45. Rhinn M, Ritschka B, Keyes WM. Cellular senescence in development, regeneration and disease. *Development.* 2019; 146:dev151837.  
<https://doi.org/10.1242/dev.151837>  
PMID: [31575608](https://pubmed.ncbi.nlm.nih.gov/31575608/)
46. Zhu H, Blake S, Kusuma FK, Pearson RB, Kang J, Chan KT. Oncogene-induced senescence: From biology to therapy. *Mech Ageing Dev.* 2020; 187:111229.  
<https://doi.org/10.1016/j.mad.2020.111229>  
PMID: [32171687](https://pubmed.ncbi.nlm.nih.gov/32171687/)
47. Aneillas C, Abdelmohsen K, Gorospe M. Regulation of senescence traits by MAPKs. *Geroscience.* 2020; 42:397–408.  
<https://doi.org/10.1007/s11357-020-00183-3>  
PMID: [32300964](https://pubmed.ncbi.nlm.nih.gov/32300964/)
48. Astle MV, Hannan KM, Ng PY, Lee RS, George AJ, Hsu AK, Haupt Y, Hannan RD, Pearson RB. AKT induces senescence in human cells via mTORC1 and p53 in the absence of DNA damage: implications for targeting mTOR during malignancy. *Oncogene.* 2012; 31:1949–62.  
<https://doi.org/10.1038/onc.2011.394>  
PMID: [21909130](https://pubmed.ncbi.nlm.nih.gov/21909130/)



49. Jung SH, Hwang HJ, Kang D, Park HA, Lee HC, Jeong D, Lee K, Park HJ, Ko YG, Lee JS. mTOR kinase leads to PTEN-loss-induced cellular senescence by phosphorylating p53. *Oncogene*. 2019; 38:1639–50. <https://doi.org/10.1038/s41388-018-0521-8> PMID:30337688
50. Blagosklonny MV. Rapamycin and quasi-programmed aging: four years later. *Cell Cycle*. 2010; 9:1859–62. <https://doi.org/10.4161/cc.9.10.11872> PMID:20436272
51. Demidenko ZN, Korotchikina LG, Gudkov AV, Blagosklonny MV. Paradoxical suppression of cellular senescence by p53. *Proc Natl Acad Sci U S A*. 2010; 107:9660–4. <https://doi.org/10.1073/pnas.1002298107> PMID:20457898
52. Leontieva OV, Natarajan V, Demidenko ZN, Burdelya LG, Gudkov AV, Blagosklonny MV. Hypoxia suppresses conversion from proliferative arrest to cellular senescence. *Proc Natl Acad Sci U S A*. 2012; 109:13314–8. <https://doi.org/10.1073/pnas.1205690109> PMID:22847439
53. Leontieva OV, Demidenko ZN, Blagosklonny MV. S6K in geroconversion. *Cell Cycle*. 2013; 12:3249–52. <https://doi.org/10.4161/cc.26248> PMID:24036549
54. Leontieva OV, Demidenko ZN, Blagosklonny MV. MEK drives cyclin D1 hyper-elevation during geroconversion. *Cell Death Differ*. 2013; 20:1241–9. <https://doi.org/10.1038/cdd.2013.86> PMID:23852369
55. Leontieva OV, Blagosklonny MV. Tumor promoter-induced cellular senescence: cell cycle arrest followed by geroconversion. *Oncotarget*. 2014; 5:12715–27. <https://doi.org/10.18632/oncotarget.3011> PMID:25587030
56. Laberge RM, Sun Y, Orjalo AV, Patil CK, Freund A, Zhou L, Curran SC, Davalos AR, Wilson-Edell KA, Liu S, Limbad C, Demaria M, Li P, et al. MTOR regulates the pro-tumorigenic senescence-associated secretory phenotype by promoting IL1A translation. *Nat Cell Biol*. 2015; 17:1049–61. <https://doi.org/10.1038/ncb3195> PMID:26147250
57. Wang R, Sunchu B, Perez VI. Rapamycin and the inhibition of the secretory phenotype. *Exp Gerontol*. 2017; 94:89–92. <https://doi.org/10.1016/j.exger.2017.01.026> PMID:28167236
58. Wang R, Yu Z, Sunchu B, Shoaf J, Dang I, Zhao S, Caples K, Bradley L, Beaver LM, Ho E, Löhr CV, Perez VI. Rapamycin inhibits the secretory phenotype of senescent cells by a Nrf2-independent mechanism. *Aging Cell*. 2017; 16:564–74. <https://doi.org/10.1111/acer.12587> PMID:28371119
59. Houssaini A, Breau M, Kebe K, Abid S, Marcos E, Lipskaia L, Rideau D, Parpaleix A, Huang J, Amsellem V, Vienne N, Validire P, Maitre B, et al. mTOR pathway activation drives lung cell senescence and emphysema. *JCI Insight*. 2018; 3:93203. <https://doi.org/10.1172/jci.insight.93203> PMID:29415880
60. Iglesias-Bartolome R, Patel V, Cotrim A, Leelahavanichkul K, Molinolo AA, Mitchell JB, Gutkind JS. mTOR inhibition prevents epithelial stem cell senescence and protects from radiation-induced mucositis. *Cell Stem Cell*. 2012; 11:401–14. <https://doi.org/10.1016/j.stem.2012.06.007> PMID:22958932
61. Sodagam L, Lewinska A, Wnuk M, Rattan SIS. Chronic exposure to rapamycin and episodic serum starvation modulate ageing of human fibroblasts in vitro. *Biogerontology*. 2017; 18:841–54. <https://doi.org/10.1007/s10522-017-9730-8> PMID:28884409
62. Nie D, Zhang J, Zhou Y, Sun J, Wang W, Wang JH. Rapamycin Treatment of Tendon Stem/Progenitor Cells Reduces Cellular Senescence by Upregulating Autophagy. *Stem Cells Int*. 2021; 2021:6638249. <https://doi.org/10.1155/2021/6638249> PMID:33603790
63. Maskey RS, Wang F, Lehman E, Wang Y, Emmanuel N, Zhong W, Jin G, Abraham RT, Arndt KT, Myers JS, Mazurek A. Sustained mTORC1 activity during palbociclib-induced growth arrest triggers senescence in ER+ breast cancer cells. *Cell Cycle*. 2021; 20:65–80. <https://doi.org/10.1080/15384101.2020.1859195> PMID:33356791
64. Gao C, Ning B, Sang C, Zhang Y. Rapamycin prevents the intervertebral disc degeneration via inhibiting differentiation and senescence of annulus fibrosus cells. *Aging (Albany NY)*. 2018; 10:131–43. <https://doi.org/10.18632/aging.101364> PMID:29348392
65. Gu Z, Tan W, Ji J, Feng G, Meng Y, Da Z, Guo G, Xia Y, Zhu X, Shi G, Cheng C. Rapamycin reverses the senescent phenotype and improves immunoregulation of mesenchymal stem cells from MRL/lpr mice and systemic lupus erythematosus patients through inhibition of the mTOR signaling pathway. *Aging (Albany NY)*. 2016; 8:1102–14. <https://doi.org/10.18632/aging.100925> PMID:27048648

66. Herranz N, Gallage S, Mellone M, Wuestefeld T, Klotz S, Hanley CJ, Raguz S, Acosta JC, Innes AJ, Banito A, Georgilis A, Montoya A, Wolter K, et al. mTOR regulates MAPKAPK2 translation to control the senescence-associated secretory phenotype. *Nat Cell Biol.* 2015; 17:1205–17.  
<https://doi.org/10.1038/ncb3225>  
PMID:26280535
67. Luo Y, Li L, Zou P, Wang J, Shao L, Zhou D, Liu L. Rapamycin enhances long-term hematopoietic reconstitution of ex vivo expanded mouse hematopoietic stem cells by inhibiting senescence. *Transplantation.* 2014; 97:20–9.  
<https://doi.org/10.1097/TP.0b013e3182a7fcf8>  
PMID:24092377
68. Kolesnichenko M, Hong L, Liao R, Vogt PK, Sun P. Attenuation of TORC1 signaling delays replicative and oncogenic RAS-induced senescence. *Cell Cycle.* 2012; 11:2391–401.  
<https://doi.org/10.4161/cc.20683>  
PMID:22627671
69. Mercier I, Camacho J, Titchen K, Gonzales DM, Quann K, Bryant KG, Molchansky A, Milliman JN, Whitaker-Menezes D, Sotgia F, Jasmin JF, Schwarting R, Pestell RG, et al. Caveolin-1 and accelerated host aging in the breast tumor microenvironment: chemoprevention with rapamycin, an mTOR inhibitor and anti-aging drug. *Am J Pathol.* 2012; 181:278–93.  
<https://doi.org/10.1016/j.ajpath.2012.03.017>  
PMID:22698676
70. Blagosklonny MV. Does rapamycin slow down time? *Oncotarget.* 2018; 9:30210–2.  
<https://doi.org/10.18632/oncotarget.25788>  
PMID:30100983
71. Gems D, de la Guardia Y. Alternative Perspectives on Aging in *Caenorhabditis elegans*: Reactive Oxygen Species or Hyperfunction? *Antioxid Redox Signal.* 2013; 19:321–9.  
<https://doi.org/10.1089/ars.2012.4840>  
PMID:22870907
72. Gems D, Partridge L. Genetics of longevity in model organisms: debates and paradigm shifts. *Annu Rev Physiol.* 2013; 75:621–44.  
<https://doi.org/10.1146/annurev-physiol-030212-183712>  
PMID:23190075
73. Wang H, Zhang Z, Gems D. Monsters in the uterus: teratoma-like tumors in senescent *C. elegans* result from a parthenogenetic quasi-program. *Aging (Albany NY).* 2018; 10:1188–9.  
<https://doi.org/10.18632/aging.101486>  
PMID:29923830
74. Gems D. The hyperfunction theory: An emerging paradigm for the biology of aging. *Ageing Res Rev.* 2022; 74:101557.  
<https://doi.org/10.1016/j.arr.2021.101557>  
PMID:34990845
75. Blagosklonny MV. The hyperfunction theory of aging: three common misconceptions. *Oncoscience.* 2021; 8:103–7.  
<https://doi.org/10.18632/oncoscience.545>  
PMID:34549076
76. Blagosklonny MV. An anti-aging drug today: from senescence-promoting genes to anti-aging pill. *Drug Discov Today.* 2007; 12:218–24.  
<https://doi.org/10.1016/j.drudis.2007.01.004>  
PMID:17331886

# Are menopause, aging and prostate cancer diseases?

Mikhail V. Blagosklonny<sup>1</sup>

<sup>1</sup>Roswell Park Comprehensive Cancer Center, Buffalo, NY 14263, USA

**Correspondence to:** Mikhail V. Blagosklonny; **email:** [Blagosklonny@oncotarget.com](mailto:Blagosklonny@oncotarget.com), [Blagosklonny@rapalogs.com](mailto:Blagosklonny@rapalogs.com)

**Keywords:** geroscience, mTOR, hyperfunction theory of aging, lifespan, healthspan

**Received:** January 2, 2023

**Accepted:** January 16, 2023

**Published:** January 26, 2023

**Copyright:** © 2023 Blagosklonny. This is an open access article distributed under the terms of the [Creative Commons Attribution License](https://creativecommons.org/licenses/by/3.0/) (CC BY 3.0), which permits unrestricted use, distribution, and reproduction in any medium, provided the original author and source are credited.

## ABSTRACT

There is no doubt that prostate cancer is a disease. Then, according to hyperfunction theory, menopause is also a disease. Like all age-related diseases, it is a natural process, but is also purely harmful, aimless and unintended by nature. But exactly because these diseases (menopause, prostate enlargement, obesity, atherosclerosis, hypertension, diabetes, presbyopia and thousands of others) are partially quasi-programmed, they can be delayed by slowing aging. Is aging a disease? Aging is a quasi-programmed disease that is partially treatable by rapamycin. On the other hand, aging is an abstraction, a sum of all quasi-programmed diseases and processes. In analogy, the zoo consists of animals and does not exist without animals, but the zoo is not an animal.

## Prostate cancer

Prostate cancer is an age-related disease. Every man would be diagnosed with prostate cancer, except that most men do not live long enough, dying from other age-related diseases. The frequency of prostate cancer detected by autopsy is 30-fold higher than mortality from prostate cancer so that “more men die with prostate cancer than because of it” [1]. Among men aged 70–79, a tumor is found by autopsy in 36% of Caucasians and 51% of African-Americans [1, 2]. The older the man, the higher frequency of autopsy-detected prostate cancer. The frequency of high-grade prostate cancer doubles every ten years [1].

Puberty is critical for susceptibility to prostate cancer later in life [3]. Older age at sexual maturation is linked to a decreased risk of prostate cancer later [4, 5]. Thus, prostate cancer is partially quasi-programmed (it will be discussed later) in puberty and would develop almost in everyone, if other causes of death did not exist.

## Prostate enlargement or BPH

Benign prostatic hyperplasia (BPH) is the most common age-related disease in men. An enlarged prostate can block the urethra, leading to an inability

to urinate and kidney damage and, if left untreated, to death. Benign prostatic hyperplasia can be detectable by the age of 30. Between 30 and 50 the prostate grows in size, with a doubling time of 4.5 years. Between 51 and 70 years old, the doubling time is around 10 years [6]. Thus, the prostate is enlarged in every aging man, and therefore it is a “normal” disease, occurring in everyone, often asymptomatic.

Early in puberty, the prostate doubles in size, and its secretory function is increased to produce prostate fluid. During puberty, the prostate reaches the required size and function, but it continues to grow without purpose, becoming eventually hypertrophic, hyperplastic and hyper functional. The disease is quasi-programmed, a continuation of the developmental growth and reproductive program that was not switched off upon its completion. Quasi-programs are purely harmful and unintended by nature, but they are a continuation (or a byproduct) of essential programs, so natural selection is powerless to eliminate them. (Note: The force of natural selection is negligible late in life, so selection is very weak against quasi-programs. Natural selection is maximally strong for growth and reproductive programs, and quasi-programs are by-products).

Cellular hyperfunctions drive prostate growth and, ultimately, benign prostate hyperplasia (BPH). Hyperproliferation of epithelial and stromal cells, leukocyte infiltration, inflammation and other hyperfunctions lead to BPH. Hypersecretory phenotype (hyperfunction) also known as senescence-associated secretory phenotype (SASP) contributes to the development of BPH [7, 8]. Prostatic inflammation (hyperfunction) stimulates prostatic growth and progression of symptoms [9].

mTOR drives cellular size growth, hyper-inflammation, senescent and hyper-secretory phenotypes [10–17]. Therefore, rapamycin (Rapatar) prevents prostate hypertrophy and hyperplasia and reduces inflammation in rat models of BPH [18].

### Atherosclerosis

Atherosclerosis is driven by hyperfunction of numerous cell types, acting locally and distantly. Thus, activation of endothelial cells, smooth muscle cells (SMC) and macrophages contributes to the formation of atherosclerotic plaque. Hypertrophy and hyperplasia of SMC and hypertrophic transformation of macrophages (foam cells) are hallmarks of atherosclerosis. Hyperfunctional blood platelets interact with the arterial wall, accelerating atherosclerosis and thrombosis. Adipocytes and hepatocytes hyperproduce atherogenic lipoproteins and cytokines. Hyperlipidemia, hyperglycemia, hyperinsulinemia, and hypertension contribute to atherosclerosis. Atherosclerosis is associated with all other diseases of aging, especially hypertension, type II diabetes and obesity.

Atherosclerosis originates in childhood and progresses throughout life [19]. It occurs in everyone. It is a hallmark of aging and a “normal disease”.

Clinical manifestations of atherosclerosis, cardiovascular diseases, are the main causes of death in humans. The path from cellular hyperfunction that causes atherosclerosis, hypertension and thrombosis to myocardial infarction is shown in Figure 2 in ref. [20].

Rapamycin (sirolimus) and its analog (everolimus) attenuate atherosclerosis in mice [21] and rabbits [22]. According to a prospective randomized controlled trial, rapamycin (sirolimus) decreased carotid atherosclerosis in humans [23].

### Menopause

Some age-related diseases are so program-like that they are considered to be the norm. Menopause happens in

every woman (the average age at menopause is 51, according to the North American Menopause Society), and therefore it is not commonly viewed as a disease. But atherosclerosis and prostate enlargement (and all age-related diseases) also happen in everyone. One may argue that menopause is not as deadly as cancer. However, it is deadlier than osteoarthritis and Alzheimer’s disease. Menopause promotes cardiovascular diseases (CVD) osteoporosis, obesity, type II diabetes and other diseases [24, 25]. Needless to say, loss of reproductive function is highly disadvantageous from an evolutionary point of view (we will discuss the grandmother hypothesis in the next section).

One may argue that menopause occurs too early in life compared with prostate cancer and Alzheimer’s disease, for instance, to be called disease. However, premature menopause is considered a disease. By arbitrary definition, it occurs before the age of 40 years, or two standard deviations in years before the mean menopausal age of the study population [26].

Regulation of the menstrual cycle is very intricate and vulnerable, and hormonal hyperstimulation can disrupt the cycle. Even low doses of estradiol and progesterone are contraceptive. The famous contraceptive “*Plan B*”, a progestin, disrupts the menstrual cycle and prevents pregnancy by a single dose. (Note: in comparison, the regulation of a male reproduction function is much simpler, explaining why men do not lose it as much as women do with age).

Not surprisingly, hyperfunction of the hypothalamic-pituitary-ovarian axis eventually dysregulates the system and causes ovarian failure (see Figure 3 in ref. [27]). The menstrual cycle is tightly-regulated by numerous hormones, cell types and organs. Luteinizing hormone (LH) and follicle-stimulating hormone (FSH), produced by the pituitary gland, stimulate ovulation and the production of estrogens and progesterone by the ovary. For example, FSH stimulates follicles, production of ova and estrogens. Before puberty, the levels of both FSH and estrogens are low. To start the menstrual cycle, production of FSH is increased, stimulating the ovaries and estrogen production. Activation of follicles from the dormant pool serves as the source of fertilizable ova. With age, levels of FSH continuously increase, hyper-stimulating the ovaries [28], causing more follicles to be recruited simultaneously (see Figures 3–4 in ref. [27]).

Hyper-stimulation of follicle recruitment leads to follicular depletion and ovarian failure.

Thus, stimulation of FSH initiates puberty, and its continuous hyperfunction accelerates menopause. Since

the quasi-program of menopause is a continuation of puberty, mTOR, a central regulator of the onset of puberty, accelerates the onset of both puberty [29] and menopause in animals [30–32].

By activating mTOR, obesity accelerates ovarian follicle development and follicle loss in rats [33]. By inhibiting mTOR, calorie restriction delays puberty and extends reproductive lifespan in rodents [34, 35]. Overactivated mTOR activates the entire primordial follicle pool, and, subsequently, all primordial follicles become depleted in early adulthood, causing premature ovarian failure (POF) in mice [30–32].

Rapamycin preserves the follicle pool reserve and prolongs the ovarian lifespan in female rats [36] and mice [34, 37, 38]. mTOR is overactivated in the peripheral blood cells of women with premature ovarian insufficiency [39].

### **Critique of the grandmother (great-great-grandmother hypothesis) hypothesis**

As we discussed in the previous section, menopause is a byproduct of the reproductive program that initiates puberty. The same process that turns the menstrual cycle on in puberty becomes hyperfunctional, damaging the reproductive system and (unintentionally) switching it off. As are all age-related diseases, menopause is purely harmful and provides no benefits.

Some prominent gerontologists, however, hypothesize that menopause is adaptive and intended by natural selection to prevent older women from reproduction and thus redirect their efforts to help daughters to raise grandchildren [40]. Unless a daughter is a modern working mom, rather than a prehistorical female, this hypothesis makes no sense.

First, the natural age of grandmothers is 28, whereas menopause occurs at 51. Then the hypothesis should be renamed as great-great-grandmother hypothesis. The genetic similarities of a woman with great-grandchildren are less than with nephews and nieces.

Second, the best possible help would be breast feeding. However, post-menopausal women cannot get pregnant and therefore cannot lactate. If nature selects for caring for grandchildren, elderly women should produce milk or become pregnant to produce it.

Third, only maternal grandmothers increase grandchildren's survival, whereas paternal mothers decrease it. The presence of paternal grandmothers (mothers-in-law) is detrimental to grandchild survival or well-being

[41–44]. In most societies, a wife would likely live with a parental grandmother.

Fourth, only a minority of pre-historical females lived long enough to become great-great-grandmothers. Even 300 years ago in England, only 25% of people survived to the age of 26. How many would survive until menopause? It is commonly argued that hunter-gatherers lived as long as modern people. Although the maximal lifespan can be the same, due to accidental causes of death, the median lifespan of any species in the wild is much shorter than in a protected environment (laboratory animals and modern humans). It does not matter how long some survivors live after menopause, what is important is that most died before it.

If only one of these arguments is correct, the grandmother hypothesis has little value. The list can go on [45]. Some observations cannot be reconciled with the grandmother hypothesis. Older women have an increased chance of giving birth to twins and triples [46]. Furthermore, the outcome of such pregnancies in older mothers are better than in younger mothers [47, 48]. Why is declining fertility associated with the increasing twinning rate? It is in agreement with hyperfunction theory. Hyperstimulation with FSH leads to multiple ovulation and a higher incidence of twins and triplets with age [46].

If menopause were adaptive, it would be conditional in the presence of grandchildren, but not in their absence. Conditional control is easy to achieve, even a single spike of sex steroids is sufficient to do the trick (this is exactly what a single pill of birth control pill like “*plan B*”, a progestin, does).

If nature equipped women with menopause to take care of grandchildren, why then does it impair their vision? Presbyopia, or age-related farsightedness, develops in humans by the age of female menopause. Is presbyopia an adaptive program as well? Like menopause, presbyopia is quasi-programmed; the ability to focus on near objects declines from childhood to adulthood, and its continuation culminates in presbyopia. By the time of menopause, presbyopia occurs in everyone. It is purely harmful and is treated by glasses (as a disease should be treated).

Male fertility gradually decreases with aging. Men do not have menopause, because men do not have a vulnerable menstrual cycle to start with (similarly, women do not have BPH).

Finally, consider a parody “grandfather hypothesis” that prostate hyperplasia develops in order to make men urinate in the middle of the night and thus protect



grandchildren from lions. I hope it is not taken seriously, just as the bizarre grandmother hypothesis should not be either.

### **Age-related diseases happen, potentially, in everyone**

It is difficult to define a disease, especially an age-related disease [49, 50]. For example, osteoporosis and obesity were not officially recognized as diseases until 1994 and 2013, retrospectively. Whether we define age-related alterations as a disease depends on political, cultural, financial, medical and social reasons.

The main objection to considering age-related diseases such as menopause and presbyopia as diseases is that they happen to everyone. However, disease does not need to be rare to be a disease. For example, everyone may be sick with influenza during their lifetime, but it does not make it any less a disease. Furthermore, no definition of disease includes the requirement that it should not affect everyone.

All age-related diseases happen either in everyone (for example, prostate enlargement in men and atherosclerosis) or would happen in everyone (Alzheimer's disease and cancer), if one does not die from a competing disease. For example, a human may suddenly die from myocardial fibrillation due to coronary atherosclerosis at the age of 60, but if one were saved and properly treated, they may be diagnosed with Alzheimer's disease, and die from cancer at the age of 80.

### **Age-related diseases are quasi-programmed**

Age-related diseases occur to everyone, and, therefore, no one is immortal.

They happen in everyone because they are quasi-programmed in development, a continuation of growth and reproductive programs. External (environmental) factors and genetic predispositions also play a role, making certain age-related diseases manifest at different times or even not manifest at all in a lifetime.

For example, hypertension is a continuation of developmentally increased blood pressure from the newborn (blood pressure 64/41 mmHg) to the adult. Hypertension can also be viewed as a quasi-program of growth upon its completion. In fact, accelerated postnatal growth leads to higher blood pressure later in life [51]. Yet, external factors such as alcohol and smoking may accelerate the development of hypertension [52].

Cancers are the least quasi-programmed among all aging-related diseases because of the critical role of (a)

external factors (e.g., smoking) that cause mutations and (b) inherited genetic susceptibility. In prostate enlargement, in comparison, environmental and genetic factors play a lesser role, and the prostate becomes hyperplastic and hypertrophic in everyone.

External factors and genetic variations may accelerate and aggravate quasi-programmed diseases. In humans, the role of external factors and genetic variability may obscure quasi-programmed nature of diseases. In genetically identical *C. elegans* at identical conditions, age-related diseases are clearly quasi-programmed [53–57].

### **Age-related diseases are hyper-functional**

Age-related diseases are driven by hyperfunctions on different levels: from signal-transduction pathways, to cells and tissues, to systems and organs. These hyperfunctions eventually damage tissues and organs, causing secondary loss of function. Hyperfunction is a function that was not turned off upon its completion [58]. (Note: Hyperfunction is not necessarily an absolute increase in function but may even be a decrease if it is still higher than optimal for longevity [59]). For example, mTOR drives cellular growth, but when the cell cycle is blocked, and mTOR is not turned down, then it drives the senescence phenotype associated with hyperfunctions such as SASP and proinflammation [60]. Cellular hyperfunctions are tissue-specific: osteoclasts resorb the bone, thus leading to osteoporosis; fibroblasts and immune cells cause proinflammation, associated with most age-related diseases; constriction of arterial SMC causes coronary artery spasm; blood platelets form clots. On systemic levels, hyperfunctions include hyperinsulinemia, hypertension, hyperglycemia, hyperlipidemia and others.

Cellular hyperfunction inevitably leads to age-related diseases and then to organ failure and secondary functional decline [61]. For example, hyperfunctional cells promote atherosclerosis, hypertension, arterial spasm, thrombosis, culminating in myocardial infarction, which, in turn, causes loss of function [20, 62].

mTORC1-dependent beta-cell hyperfunction culminates in beta-cell exhaustion (diabetes) [63–65]. Ovarian overactivation leads to follicular exhaustion and menopause [27, 30–32, 34, 36–38].

Hyperfunctional phases of pre-diseases are often asymptomatic, while their consequences – loss of function – are always symptomatic. Even classic diseases, such as hypertension, may have mild symptoms until damage occurs (stroke, myocardial infarction, heart or renal failure).

Functional decline in athletic performance [66] can precede official age-related diseases. Such an early-life decline is not caused by recognized age-related diseases. Early-life hyperfunctions are unrecognized. They are asymptomatic, until causing mild functional decline in athletic performance in everyone. Secondary loss of function can be observed early in life due to unnamed hyperfunctions.

### Is aging a disease?

According to conventional views, aging is a risk factor for developing disease. It is believed that aging can be healthy (without diseases) and that humans can die either from aging or from diseases. It was claimed, “aging should be strongly considered not to be a disease and as such should not be treated” [67].

According to hyperfunction theory, aging is not a risk factor, aging is the sum of all age-related diseases. There is no aging without these diseases. So-called “healthy” aging is slow aging observed in centenarians, who develop diseases later in life. But no centenarian dies from old age, all die from age-related diseases [68–70].

Like quasi-programmed diseases, aging is a natural continuation of developmental programs that were not switched off upon their completion. Aging is the sum of all quasi-programmed diseases. As David Gems put it, aging versus disease is a false dichotomy [71].

Aging is natural. Natural process is a disease, if it leads to death or functional decline [50, 71, 72]. A natural process, such as atherosclerosis, is a disease, whereas an unnatural process, such as a car accident, is not a disease. All age-related diseases are natural, and therefore we are mortal.

Aging is driven, in part, by hyperfunctional signaling pathways, such as the nutrient-sensing and growth-promoting mTOR pathway. Inhibition of the mTOR pathway by genetic, pharmacological and other means extends lifespan in numerous species and decelerates development of age-related diseases [73–75].

As suggested in 2006, “Once development is completed, a program for development is not switched off, thus becoming a quasi-program for aging. This hyper-functional quasi-program is manifested as diseases of aging, leading to organ damage and secondary decline.” [58]. (Note: Secondary decline is the most visible manifestations of advanced aging).

So, is aging a disease?

On one hand, aging is a progressing disease with 100% mortality rate. It can be treated (as a disease) with

rapamycin, for instance. Diseases can be prevented by slowing down aging [58]. Potential anti-aging drugs could be tested by slowing diseases. Disease or not, aging is as treatable as a disease [76].

However, aging is not a specific disease, but the sum of all age-related diseases, including both life-limiting (e.g., diabetes, cancer and CVD) and non-life-limiting (e.g., osteoarthritis and gray hair). It is a form of complex disease syndrome [71]. Using an analogy, is the American people a human? Is it a man or a woman? The people consist of all men and women; each of them is a human. But the people are not a human, neither a man nor a woman. Similarly, aging consists of all quasi-programmed alterations, age-related pre-diseases and diseases, early unrecognizable diseases that manifested as early functional decline, cosmetic conditions, and others. The aging process is the common mechanism of all diseases.

Given that aging is a sum of all age-related diseases, it can be called aging syndrome, or aging.

Aging seems mysterious, if one is studying so-called “healthy” or “successful” aging. One can subtract disease after disease until nothing is left. No aging. It is like subtracting every man and woman from the American people until nothing is left. Aging looks quasi-programmed, because it consists of quasi-programmed diseases that are driven by hyperfunctions that culminate into organ/system failure (and secondary loss of function). Aging behaves as the sum of all diseases. And this sum can be prevented by inhibiting the common mechanism that we call aging. Aging is driven by the same processes as diseases: from over stimulated signal-transduction pathways to cellular hyperfunction, systemic hyperfunction leading to organ failure (secondary functional decline). To understand aging, we should depict the pathogenesis of overlapping age-related diseases driven by hyperfunctional signals and cells towards organ damage. Aging is a collection of processes that drive quasi-programmed diseases. Preventive medicine that targets early hyperfunctional stages of a group of overlapping diseases is an anti-aging medicine. Aging can be understood through the development of all quasi-programmed diseases. Treatments that prevent age-related diseases partially prevent aging and *vice versa* [71, 77].

### CONFLICTS OF INTEREST

The author declares no conflicts of interest related to this study.

### REFERENCES

1. Jacklin C, Philippou Y, Brewster SF, Bryant RJ. "More



- men die with prostate cancer than because of it" - an old adage that still holds true in the 21st century. *Cancer Treat Res Commun*. 2021; 26:100225. <https://doi.org/10.1016/j.ctarc.2020.100225> PMID:33360667
2. Jahn JL, Giovannucci EL, Stampfer MJ. The high prevalence of undiagnosed prostate cancer at autopsy: implications for epidemiology and treatment of prostate cancer in the Prostate-specific Antigen-era. *Int J Cancer*. 2015; 137:2795–802. <https://doi.org/10.1002/ijc.29408> PMID:25557753
  3. Hur J, Giovannucci E. Racial differences in prostate cancer: does timing of puberty play a role? *Br J Cancer*. 2020; 123:349–54. <https://doi.org/10.1038/s41416-020-0897-4> PMID:32439935
  4. Bonilla C, Lewis SJ, Martin RM, Donovan JL, Hamdy FC, Neal DE, Eeles R, Easton D, Kote-Jarai Z, Al Olama AA, Benlloch S, Muir K, Giles GG, et al, and PRACTICAL consortium. Pubertal development and prostate cancer risk: Mendelian randomization study in a population-based cohort. *BMC Med*. 2016; 14:66. <https://doi.org/10.1186/s12916-016-0602-x> PMID:27044414
  5. Céline J, Bygdell M, Martikainen J, Styrke J, Damber JE, Kindblom JM, Ohlsson C. Timing of the Pubertal Growth Spurt and Prostate Cancer. *Cancers (Basel)*. 2021; 13:6238. <https://doi.org/10.3390/cancers13246238> PMID:34944857
  6. Berry SJ, Coffey DS, Walsh PC, Ewing LL. The development of human benign prostatic hyperplasia with age. *J Urol*. 1984; 132:474–9. [https://doi.org/10.1016/s0022-5347\(17\)49698-4](https://doi.org/10.1016/s0022-5347(17)49698-4) PMID:6206240
  7. Vital P, Castro P, Tsang S, Ittmann M. The senescence-associated secretory phenotype promotes benign prostatic hyperplasia. *Am J Pathol*. 2014; 184:721–31. <https://doi.org/10.1016/j.ajpath.2013.11.015> PMID:24434012
  8. Castro P, Giri D, Lamb D, Ittmann M. Cellular senescence in the pathogenesis of benign prostatic hyperplasia. *Prostate*. 2003; 55:30–8. <https://doi.org/10.1002/pros.10204> PMID:12640658
  9. Chughtai B, Lee R, Te A, Kaplan S. Role of inflammation in benign prostatic hyperplasia. *Rev Urol*. 2011; 13:147–50. PMID:22110398
  10. Sabatini DM. Twenty-five years of mTOR: Uncovering the link from nutrients to growth. *Proc Natl Acad Sci U S A*. 2017; 114:11818–25. <https://doi.org/10.1073/pnas.1716173114> PMID:29078414
  11. Saxton RA, Sabatini DM. mTOR Signaling in Growth, Metabolism, and Disease. *Cell*. 2017; 168:960–76. <https://doi.org/10.1016/j.cell.2017.02.004> PMID:28283069
  12. Cornu M, Albert V, Hall MN. mTOR in aging, metabolism, and cancer. *Curr Opin Genet Dev*. 2013; 23:53–62. <https://doi.org/10.1016/j.gde.2012.12.005> PMID:23317514
  13. Demidenko ZN, Blagosklonny MV. Growth stimulation leads to cellular senescence when the cell cycle is blocked. *Cell Cycle*. 2008; 7:3355–61. <https://doi.org/10.4161/cc.7.21.6919> PMID:18948731
  14. Demidenko ZN, Zubova SG, Bukreeva EI, Pospelov VA, Pospelova TV, Blagosklonny MV. Rapamycin decelerates cellular senescence. *Cell Cycle*. 2009; 8:1888–95. <https://doi.org/10.4161/cc.8.12.8606> PMID:19471117
  15. Blagosklonny MV, Hall MN. Growth and aging: a common molecular mechanism. *Aging (Albany NY)*. 2009; 1:357–62. <https://doi.org/10.18632/aging.100040> PMID:20157523
  16. Laberge RM, Sun Y, Orjalo AV, Patil CK, Freund A, Zhou L, Curran SC, Davalos AR, Wilson-Edell KA, Liu S, Limbad C, Demaria M, Li P, et al. mTOR regulates the pro-tumorigenic senescence-associated secretory phenotype by promoting IL1A translation. *Nat Cell Biol*. 2015; 17:1049–61. <https://doi.org/10.1038/ncb3195> PMID:26147250
  17. Wang R, Sunchu B, Perez VI. Rapamycin and the inhibition of the secretory phenotype. *Exp Gerontol*. 2017; 94:89–92. <https://doi.org/10.1016/j.exger.2017.01.026> PMID:28167236
  18. Lesovaya EA, Kirsanov KI, Antoshina EE, Trukhanova LS, Gorkova TG, Shipaeva EV, Salimov RM, Belitsky GA, Blagosklonny MV, Yakubovskaya MG, Chernova OB. Rapatar, a nanoformulation of rapamycin, decreases chemically-induced benign prostate hyperplasia in rats. *Oncotarget*. 2015; 6:9718–27. <https://doi.org/10.18632/oncotarget.3929> PMID:25991667
  19. McGill HC Jr, McMahan CA, Herderick EE, Malcom GT, Tracy RE, Strong JP. Origin of atherosclerosis in childhood and adolescence. *Am J Clin Nutr*. 2000;

- 72:1307S–15.  
<https://doi.org/10.1093/ajcn/72.5.1307s>  
PMID:11063473
20. Blagosklonny MV. Prospective treatment of age-related diseases by slowing down aging. *Am J Pathol*. 2012; 181:1142–6.  
<https://doi.org/10.1016/j.ajpath.2012.06.024>  
PMID:22841821
21. Mueller MA, Beutner F, Teupser D, Ceglarek U, Thiery J. Prevention of atherosclerosis by the mTOR inhibitor everolimus in LDLR<sup>-/-</sup> mice despite severe hypercholesterolemia. *Atherosclerosis*. 2008; 198:39–48.  
<https://doi.org/10.1016/j.atherosclerosis.2007.09.019>  
PMID:17980369
22. Chen WQ, Zhong L, Zhang L, Ji XP, Zhang M, Zhao YX, Zhang C, Zhang Y. Oral rapamycin attenuates inflammation and enhances stability of atherosclerotic plaques in rabbits independent of serum lipid levels. *Br J Pharmacol*. 2009; 156:941–51.  
<https://doi.org/10.1111/j.1476-5381.2008.00102.x>  
PMID:19239473
23. Silva AL, Fusco DR, Nga HS, Takase HM, Bravin AM, Contti MM, Valiatti MF, de Andrade LGM. Effect of sirolimus on carotid atherosclerosis in kidney transplant recipients: data derived from a prospective randomized controlled trial. *Clin Kidney J*. 2018; 11:846–52.  
<https://doi.org/10.1093/ckj/sfy041>  
PMID:30524720
24. Horiuchi S. Postmenopausal acceleration of age-related mortality increase. *J Gerontol A Biol Sci Med Sci*. 1997; 52:B78–92.  
<https://doi.org/10.1093/gerona/52a.1.b78>  
PMID:9008661
25. Lobo RA. Menopause and stroke and the effects of hormonal therapy. *Climacteric*. 2007 (Suppl 2); 10:27–31.  
<https://doi.org/10.1080/13697130701550903>  
PMID:17882669
26. Okeke T, Anyaehie U, Ezenyeaku C. Premature menopause. *Ann Med Health Sci Res*. 2013; 3:90–5.  
<https://doi.org/10.4103/2141-9248.109458>  
PMID:23634337
27. Blagosklonny MV. Why men age faster but reproduce longer than women: mTOR and evolutionary perspectives. *Aging (Albany NY)*. 2010; 2:265–73.  
<https://doi.org/10.18632/aging.100149>  
PMID:20519781
28. McTavish KJ, Jimenez M, Walters KA, Spaliviero J, Groome NP, Themmen AP, Visser JA, Handelsman DJ, Allan CM. Rising follicle-stimulating hormone levels with age accelerate female reproductive failure. *Endocrinology*. 2007; 148:4432–9.  
<https://doi.org/10.1210/en.2007-0046>  
PMID:17540727
29. Roa J, Garcia-Galiano D, Varela L, Sánchez-Garrido MA, Pineda R, Castellano JM, Ruiz-Pino F, Romero M, Aguilar E, López M, Gaytan F, Diéguez C, Pinilla L, Tena-Sempere M. The mammalian target of rapamycin as novel central regulator of puberty onset via modulation of hypothalamic Kiss1 system. *Endocrinology*. 2009; 150:5016–26.  
<https://doi.org/10.1210/en.2009-0096>  
PMID:19734277
30. Reddy P, Liu L, Adhikari D, Jagarlamudi K, Rajareddy S, Shen Y, Du C, Tang W, Hämäläinen T, Peng SL, Lan ZJ, Cooney AJ, Huhtaniemi I, Liu K. Oocyte-specific deletion of Pten causes premature activation of the primordial follicle pool. *Science*. 2008; 319:611–3.  
<https://doi.org/10.1126/science.1152257>  
PMID:18239123
31. Adhikari D, Zheng W, Shen Y, Gorre N, Hämäläinen T, Cooney AJ, Huhtaniemi I, Lan ZJ, Liu K. Tsc/mTORC1 signaling in oocytes governs the quiescence and activation of primordial follicles. *Hum Mol Genet*. 2010; 19:397–410.  
<https://doi.org/10.1093/hmg/ddp483>  
PMID:19843540
32. Adhikari D, Flohr G, Gorre N, Shen Y, Yang H, Lundin E, Lan Z, Gambello MJ, Liu K. Disruption of Tsc2 in oocytes leads to overactivation of the entire pool of primordial follicles. *Mol Hum Reprod*. 2009; 15:765–70.  
<https://doi.org/10.1093/molehr/gap092>  
PMID:19843635
33. Wang N, Luo LL, Xu JJ, Xu MY, Zhang XM, Zhou XL, Liu WJ, Fu YC. Obesity accelerates ovarian follicle development and follicle loss in rats. *Metabolism*. 2014; 63:94–103.  
<https://doi.org/10.1016/j.metabol.2013.09.001>  
PMID:24135502
34. Garcia DN, Saccon TD, Pradiee J, Rincón JAA, Andrade KRS, Rovani MT, Mondadori RG, Cruz LAX, Barros CC, Masternak MM, Bartke A, Mason JB, Schneider A. Effect of caloric restriction and rapamycin on ovarian aging in mice. *Geroscience*. 2019; 41:395–408.  
<https://doi.org/10.1007/s11357-019-00087-x>  
PMID:31359237
35. Li L, Fu YC, Xu JJ, Lin XH, Chen XC, Zhang XM, Luo LL. Caloric restriction promotes the reserve of follicle pool in adult female rats by inhibiting the activation of mammalian target of rapamycin signaling. *Reprod Sci*. 2015; 22:60–7.  
<https://doi.org/10.1177/1933719114542016>

PMID:[25001019](#)

36. Zhang XM, Li L, Xu JJ, Wang N, Liu WJ, Lin XH, Fu YC, Luo LL. Rapamycin preserves the follicle pool reserve and prolongs the ovarian lifespan of female rats via modulating mTOR activation and sirtuin expression. *Gene*. 2013; 523:82–7.  
<https://doi.org/10.1016/j.gene.2013.03.039>  
PMID:[23566837](#)
37. Mok-Lin E, Ascano M Jr, Serganov A, Rosenwaks Z, Tuschl T, Williams Z. Premature recruitment of oocyte pool and increased mTOR activity in Fmr1 knockout mice and reversal of phenotype with rapamycin. *Sci Rep*. 2018; 8:588.  
<https://doi.org/10.1038/s41598-017-18598-y>  
PMID:[29330421](#)
38. Adhikari D, Risal S, Liu K, Shen Y. Pharmacological inhibition of mTORC1 prevents over-activation of the primordial follicle pool in response to elevated PI3K signaling. *PLoS One*. 2013; 8:e53810.  
<https://doi.org/10.1371/journal.pone.0053810>  
PMID:[23326514](#)
39. Rehnitz J, Messmer B, Bender U, Nguyen XP, Germeyer A, Hinderhofer K, Strowitzki T, Capp E. Activation of AKT/mammalian target of rapamycin signaling in the peripheral blood of women with premature ovarian insufficiency and its correlation with FMR1 expression. *Reprod Biol Endocrinol*. 2022; 20:44.  
<https://doi.org/10.1186/s12958-022-00919-0>  
PMID:[35248053](#)
40. Shanley DP, Kirkwood TB. Evolution of the human menopause. *Bioessays*. 2001; 23:282–7.  
[https://doi.org/10.1002/1521-1878\(200103\)23:3<282::AID-BIES1038>3.0.CO;2-9](https://doi.org/10.1002/1521-1878(200103)23:3<282::AID-BIES1038>3.0.CO;2-9)  
PMID:[11223885](#)
41. Chapman SN, Pettay JE, Lummaa V, Lahdenperä M. Limits to Fitness Benefits of Prolonged Post-reproductive Lifespan in Women. *Curr Biol*. 2019; 29:645–50.e3.  
<https://doi.org/10.1016/j.cub.2018.12.052>  
PMID:[30744967](#)
42. Sheppard P, Sear R. Do grandparents compete with or support their grandchildren? In Guatemala, paternal grandmothers may compete, and maternal grandmothers may cooperate. *R Soc Open Sci*. 2016; 3:160069.  
<https://doi.org/10.1098/rsos.160069>  
PMID:[27152221](#)
43. Jamison CS, Cornell LL, Jamison PL, Nakazato H. Are all grandmothers equal? A review and a preliminary test of the "grandmother hypothesis" in Tokugawa Japan. *Am J Phys Anthropol*. 2002; 119:67–76.  
<https://doi.org/10.1002/ajpa.10070>  
PMID:[12209574](#)
44. Chapman SN, Lahdenperä M, Pettay JE, Lynch RF, Lummaa V. Offspring fertility and grandchild survival enhanced by maternal grandmothers in a pre-industrial human society. *Sci Rep*. 2021; 11:3652.  
<https://doi.org/10.1038/s41598-021-83353-3>  
PMID:[33574488](#)
45. Lahdenperä M, Russell AF, Tremblay M, Lummaa V. Selection on menopause in two premodern human populations: no evidence for the Mother Hypothesis. *Evolution*. 2011; 65:476–89.  
<https://doi.org/10.1111/j.1558-5646.2010.01142.x>  
PMID:[20874739](#)
46. Beemsterboer SN, Homburg R, Gorter NA, Schats R, Hompes PG, Lambalk CB. The paradox of declining fertility but increasing twinning rates with advancing maternal age. *Hum Reprod*. 2006; 21:1531–2.  
<https://doi.org/10.1093/humrep/del009>  
PMID:[16497698](#)
47. Keith LG, Goldman RD, Breborowicz G, Blickstein I. Triplet pregnancies in women aged 40 or older: a matched control study. *J Reprod Med*. 2004; 49:683–8.  
PMID:[15457860](#)
48. Oleszczuk JJ, Keith LG, Oleszczuk AK. The paradox of old maternal age in multiple pregnancies. *Obstet Gynecol Clin North Am*. 2005; 32:69–80.  
<https://doi.org/10.1016/j.ogc.2004.10.010>  
PMID:[15644290](#)
49. Scully JL. What is a disease? *EMBO Rep*. 2004; 5:650–3.  
<https://doi.org/10.1038/sj.embor.7400195>  
PMID:[15229637](#)
50. Bulterijs S, Hull RS, Björk VC, Roy AG. It is time to classify biological aging as a disease. *Front Genet*. 2015; 6:205.  
<https://doi.org/10.3389/fgene.2015.00205>  
PMID:[26150825](#)
51. Law CM, Shiell AW, Newsome CA, Syddall HE, Shinebourne EA, Fayers PM, Martyn CN, de Swiet M. Fetal, infant, and childhood growth and adult blood pressure: a longitudinal study from birth to 22 years of age. *Circulation*. 2002; 105:1088–92.  
<https://doi.org/10.1161/hc0902.104677>  
PMID:[11877360](#)
52. Nagao T, Nogawa K, Sakata K, Morimoto H, Morita K, Watanabe Y, Suwazono Y. Effects of Alcohol Consumption and Smoking on the Onset of Hypertension in a Long-Term Longitudinal Study in a Male Workers' Cohort. *Int J Environ Res Public Health*. 2021; 18:11781.  
<https://doi.org/10.3390/ijerph182211781>  
PMID:[34831535](#)

53. Gems D, de la Guardia Y. Alternative Perspectives on Aging in *Caenorhabditis elegans*: Reactive Oxygen Species or Hyperfunction? *Antioxid Redox Signal*. 2013; 19:321–9.  
<https://doi.org/10.1089/ars.2012.4840>  
PMID: [22870907](https://pubmed.ncbi.nlm.nih.gov/22870907/)
54. Gems D, Partridge L. Genetics of longevity in model organisms: debates and paradigm shifts. *Annu Rev Physiol*. 2013; 75:621–44.  
<https://doi.org/10.1146/annurev-physiol-030212-183712>  
PMID: [23190075](https://pubmed.ncbi.nlm.nih.gov/23190075/)
55. Ezcurra M, Benedetto A, Sornda T, Gilliat AF, Au C, Zhang Q, van Schelt S, Petrache AL, Wang H, de la Guardia Y, Bar-Nun S, Tyler E, Wakelam MJ, Gems D. *C. elegans* Eats Its Own Intestine to Make Yolk Leading to Multiple Senescent Pathologies. *Curr Biol*. 2018; 28:2544–56.e5.  
<https://doi.org/10.1016/j.cub.2018.06.035>  
PMID: [30100339](https://pubmed.ncbi.nlm.nih.gov/30100339/)
56. Wang H, Zhang Z, Gems D. Monsters in the uterus: teratoma-like tumors in senescent *C. elegans* result from a parthenogenetic quasi-program. *Aging (Albany NY)*. 2018; 10:1188–9.  
<https://doi.org/10.18632/aging.101486>  
PMID: [29923830](https://pubmed.ncbi.nlm.nih.gov/29923830/)
57. Wang H, Zhao Y, Ezcurra M, Benedetto A, Gilliat AF, Hellberg J, Ren Z, Galimov ER, Athigapanich T, Girstmair J, Telford MJ, Dolphin CT, Zhang Z, Gems D. A parthenogenetic quasi-program causes teratoma-like tumors during aging in wild-type *C. elegans*. *NPJ Aging Mech Dis*. 2018; 4:6.  
<https://doi.org/10.1038/s41514-018-0025-3>  
PMID: [29928508](https://pubmed.ncbi.nlm.nih.gov/29928508/)
58. Blagosklonny MV. Aging and immortality: quasi-programmed senescence and its pharmacologic inhibition. *Cell Cycle*. 2006; 5:2087–102.  
<https://doi.org/10.4161/cc.5.18.3288>  
PMID: [17012837](https://pubmed.ncbi.nlm.nih.gov/17012837/)
59. Blagosklonny MV. The hyperfunction theory of aging: three common misconceptions. *Oncoscience*. 2021; 8:103–7.  
<https://doi.org/10.18632/oncoscience.545>  
PMID: [34549076](https://pubmed.ncbi.nlm.nih.gov/34549076/)
60. Blagosklonny MV. Cell senescence, rapamycin and hyperfunction theory of aging. *Cell Cycle*. 2022; 21:1456–67.  
<https://doi.org/10.1080/15384101.2022.2054636>  
PMID: [35358003](https://pubmed.ncbi.nlm.nih.gov/35358003/)
61. Blagosklonny MV. Answering the ultimate question "what is the proximal cause of aging?". *Aging (Albany NY)*. 2012; 4:861–77.  
<https://doi.org/10.18632/aging.100525>  
PMID: [23425777](https://pubmed.ncbi.nlm.nih.gov/23425777/)
62. Palasubramaniam J, Wang X, Peter K. Myocardial Infarction-From Atherosclerosis to Thrombosis. *Arterioscler Thromb Vasc Biol*. 2019; 39:e176–85.  
<https://doi.org/10.1161/ATVBAHA.119.312578>  
PMID: [31339782](https://pubmed.ncbi.nlm.nih.gov/31339782/)
63. Ardestani A, Lupse B, Kido Y, Leibowitz G, Maedler K. mTORC1 Signaling: A Double-Edged Sword in Diabetic  $\beta$  Cells. *Cell Metab*. 2018; 27:314–31.  
<https://doi.org/10.1016/j.cmet.2017.11.004>  
PMID: [29275961](https://pubmed.ncbi.nlm.nih.gov/29275961/)
64. Reifsnyder PC, Flurkey K, Te A, Harrison DE. Rapamycin treatment benefits glucose metabolism in mouse models of type 2 diabetes. *Aging (Albany NY)*. 2016; 8:3120–30.  
<https://doi.org/10.18632/aging.101117>  
PMID: [27922820](https://pubmed.ncbi.nlm.nih.gov/27922820/)
65. Blagosklonny MV. TOR-centric view on insulin resistance and diabetic complications: perspective for endocrinologists and gerontologists. *Cell Death Dis*. 2013; 4:e964.  
<https://doi.org/10.1038/cddis.2013.506>  
PMID: [24336084](https://pubmed.ncbi.nlm.nih.gov/24336084/)
66. Ganse B, Ganse U, Dahl J, Degens H. Linear Decrease in Athletic Performance During the Human Life Span. *Front Physiol*. 2018; 9:1100.  
<https://doi.org/10.3389/fphys.2018.01100>  
PMID: [30246782](https://pubmed.ncbi.nlm.nih.gov/30246782/)
67. Fulop T, Larbi A, Khalil A, Cohen AA, Witkowski JM. Are We Ill Because We Age? *Front Physiol*. 2019; 10:1508.  
<https://doi.org/10.3389/fphys.2019.01508>  
PMID: [31956310](https://pubmed.ncbi.nlm.nih.gov/31956310/)
68. Blagosklonny MV. No limit to maximal lifespan in humans: how to beat a 122-year-old record. *Oncoscience*. 2021; 8:110–9.  
<https://doi.org/10.18632/oncoscience.547>  
PMID: [34869788](https://pubmed.ncbi.nlm.nih.gov/34869788/)
69. Berzlanovich AM, Keil W, Waldhoer T, Sim E, Fasching P, Fazeny-Dörner B. Do centenarians die healthy? An autopsy study. *J Gerontol A Biol Sci Med Sci*. 2005; 60:862–5.  
<https://doi.org/10.1093/gerona/60.7.862>  
PMID: [16079208](https://pubmed.ncbi.nlm.nih.gov/16079208/)
70. Evans CJ, Ho Y, Daveson BA, Hall S, Higginson IJ, Gao W, and GUIDE\_Care project. Place and cause of death in centenarians: a population-based observational study in England, 2001 to 2010. *PLoS Med*. 2014; 11:e1001653.  
<https://doi.org/10.1371/journal.pmed.1001653>  
PMID: [24892645](https://pubmed.ncbi.nlm.nih.gov/24892645/)

71. Gems D. The aging-disease false dichotomy: understanding senescence as pathology. *Front Genet.* 2015; 6:212.  
<https://doi.org/10.3389/fgene.2015.00212>  
PMID:[26136770](https://pubmed.ncbi.nlm.nih.gov/26136770/)
72. Janac S, Clarke B, Gems D. Aging: natural or disease? A view from medical textbooks. In: Vaiserman AM, editor. *Anti-aging Drugs: From Basic Research to Clinical Practice*. Cambridge (UK): Royal Society of Chemistry; 2017.  
PMID:[32881471](https://pubmed.ncbi.nlm.nih.gov/32881471/)
73. Blagosklonny MV. An anti-aging drug today: from senescence-promoting genes to anti-aging pill. *Drug Discov Today.* 2007; 12:218–24.  
<https://doi.org/10.1016/j.drudis.2007.01.004>  
PMID:[17331886](https://pubmed.ncbi.nlm.nih.gov/17331886/)
74. Blagosklonny MV. Rapamycin and quasi-programmed aging: four years later. *Cell Cycle.* 2010; 9:1859–62.  
<https://doi.org/10.4161/cc.9.10.11872>  
PMID:[20436272](https://pubmed.ncbi.nlm.nih.gov/20436272/)
75. Johnson SC, Rabinovitch PS, Kaeblerlein M. mTOR is a key modulator of ageing and age-related disease. *Nature.* 2013; 493:338–45.  
<https://doi.org/10.1038/nature11861>  
PMID:[23325216](https://pubmed.ncbi.nlm.nih.gov/23325216/)
76. Blagosklonny MV. Disease or not, aging is easily treatable. *Aging (Albany NY).* 2018; 10:3067–78.  
<https://doi.org/10.18632/aging.101647>  
PMID:[30448823](https://pubmed.ncbi.nlm.nih.gov/30448823/)
77. Blagosklonny MV. Validation of anti-aging drugs by treating age-related diseases. *Aging (Albany NY).* 2009; 1:281–8.  
<https://doi.org/10.18632/aging.100034>  
PMID:[20157517](https://pubmed.ncbi.nlm.nih.gov/20157517/)



# Hallmarks of cancer and hallmarks of aging

Mikhail V. Blagosklonny<sup>1</sup>

<sup>1</sup>Roswell Park Comprehensive Cancer Center, Buffalo, NY 14263, USA

**Correspondence to:** Mikhail V. Blagosklonny; **email:** [Blagosklonny@oncotarget.com](mailto:Blagosklonny@oncotarget.com), [Blagosklonny@rapalogs.com](mailto:Blagosklonny@rapalogs.com)

**Keywords:** oncology, carcinogenesis, geroscience, mTOR, rapamycin, hyperfunction theory

**Received:** February 14, 2022

**Accepted:** May 2, 2022

**Published:** May 9, 2022

**Copyright:** © 2022 Blagosklonny. This is an open access article distributed under the terms of the [Creative Commons Attribution License](https://creativecommons.org/licenses/by/3.0/) (CC BY 3.0), which permits unrestricted use, distribution, and reproduction in any medium, provided the original author and source are credited.

## ABSTRACT

A thought-provoking article by [Gems and de Magalhães](#) suggests that canonic hallmarks of aging are superficial imitations of hallmarks of cancer. I took their work a step further and proposed hallmarks of aging based on a hierarchical principle and the hyperfunction theory.

To do this, I first reexamine the hallmarks of cancer proposed by Hanahan and Weinberg in 2000. Although six hallmarks of cancer are genuine, they are not hierarchically arranged, i.e., molecular, intra-cellular, cellular, tissue, organismal and extra-organismal. (For example, invasion and angiogenesis are manifestations of molecular alterations on the tissue level; metastasis on the organismal level, whereas cell immortality is observed outside the host).

The same hierarchical approach is applicable to aging. Unlike cancer, however, aging is not a molecular disease. The lowest level of its origin is normal intracellular signaling pathways such as mTOR that drive developmental growth and, later in life, become hyperfunctional, causing age-related diseases, whose sum is aging. The key hallmark of organismal aging, from worms to humans, are age-related diseases. In addition, hallmarks of aging can be arranged as a timeline, wherein initial hyperfunction is followed by dysfunction, organ damage and functional decline.

## Hallmarks of cancer: comparing apples and oranges

As depicted by Hanahan and Weinberg in 2000 [1], the circle schema of six hallmarks of cancer somewhat compares apples and oranges [https://els-jbs-prod-cdn.jbs.elsevierhealth.com/cms/attachment/428dbc2e-657c-429d-98f4-9910c7df1678/gr1\\_lrg.jpg](https://els-jbs-prod-cdn.jbs.elsevierhealth.com/cms/attachment/428dbc2e-657c-429d-98f4-9910c7df1678/gr1_lrg.jpg).

The hallmarks themselves are exact, but they are not equal. For example, limitless replicative potential (cell immortality) cannot be directly compared to sustained angiogenesis. Cell immortality is revealed outside the host (extra-organismal level), for example, in cell culture where clonal cell lines can proliferate indefinitely without interaction with normal tissues. In contrast, sustained angiogenesis requires interaction of cancer cells with normal cells of several tissues.

Angiogenesis can be only understood on the tissue level.

Second, cancer cells undergo Darwinian-type selection [2] for resistance to anti-growth signals, resistance to apoptosis and self-sufficiency in mitogenic signals. This trio represents three out of six hallmarks of cancer [1]. They can be combined in one super-hallmark: resistance to growth-limiting conditions [3]. (Note: The definition of oncogenic resistance to growth-limiting conditions was discussed previously [4]). Not only resistance to apoptosis and anti-growth signals but also self-sufficiency in mitogenic signals render cells resistant to growth-limiting conditions. Examples of growth-limiting conditions include lack of external mitogenic signals, cytostatic cytokines such as TGF-beta, cytotoxic carcinogens such as tobacco smoke, anti-cancer drugs, contact inhibition, glucose deprivation, cellular senescence, hypoxia, absence of nutrients and

growth factors [5, 6]. For example, glucose deprivation selects for oncogenic Ras [6].

Whereas normal cells do not proliferate in growth-limiting conditions, cancer cells do. Resistance to growth-limiting conditions provides an immediate selective advantage. But what immediate advantages can be provided by cellular immortality? The cell cannot tell the future, that it will live in cell culture one day. Cellular immortality is selected indirectly as derived hallmarks [3], because the same mutations that provide resistance to growth-limiting conditions also make cells immortal, angiogenic, invasive and metastatic [1, 7, 8]. Cellular immortality, angiogenesis, invasion and metastasis are derived hallmarks.

Third, molecular alterations (e.g., DNA mutations) are absent in the six-hallmark circle by Hanahan and Weinberg [1]. As discussed by Gems and de Magalhães, the hallmarks do not include mutations (or genetic instability) because this hallmark is implicitly taken for granted [9]. In fact, Hanahan and Weinberg called it an enabling hallmark in their revised paper published in 2011 [7].

In 2005, I explicitly included the molecular hallmark (mutations) and suggested the hierarchical principle to arrange these hallmarks from molecular to organismal levels [5].

**Hierarchical model of hallmarks of cancer: arranging the oranges**

Here I present the hallmarks of cancer, depicted as a circle by Hanahan and Weinberg [1], not as the circle but hierarchically, from molecular levels to the organism (Figure 1).

**Molecular level: Somatically inheritable molecular alterations.**

Genome instability is an enabling hallmark of cancer because it enables the acquisition of molecular alterations, such as DNA mutations, aneuploidy and epigenetic alterations [7]. Vogelstein et al. suggested that a typical human tumor contains relatively few driver gene mutations that each confers a growth advantage of 0.4% and numerous passenger gene mutations that confer no selective advantage [8, 10].

**Intracellular signaling pathways: Oncogenic translation of ambivalent signaling**

Signal-transduction pathways are ambivalent, causing opposite outcomes depending on cellular context. Oncogenic mutations re-wire signal transduction pathways. For example, MAPK pathways can simultaneously induce cyclin D1 and CDK inhibitors, leading either to cellular proliferation or senescence

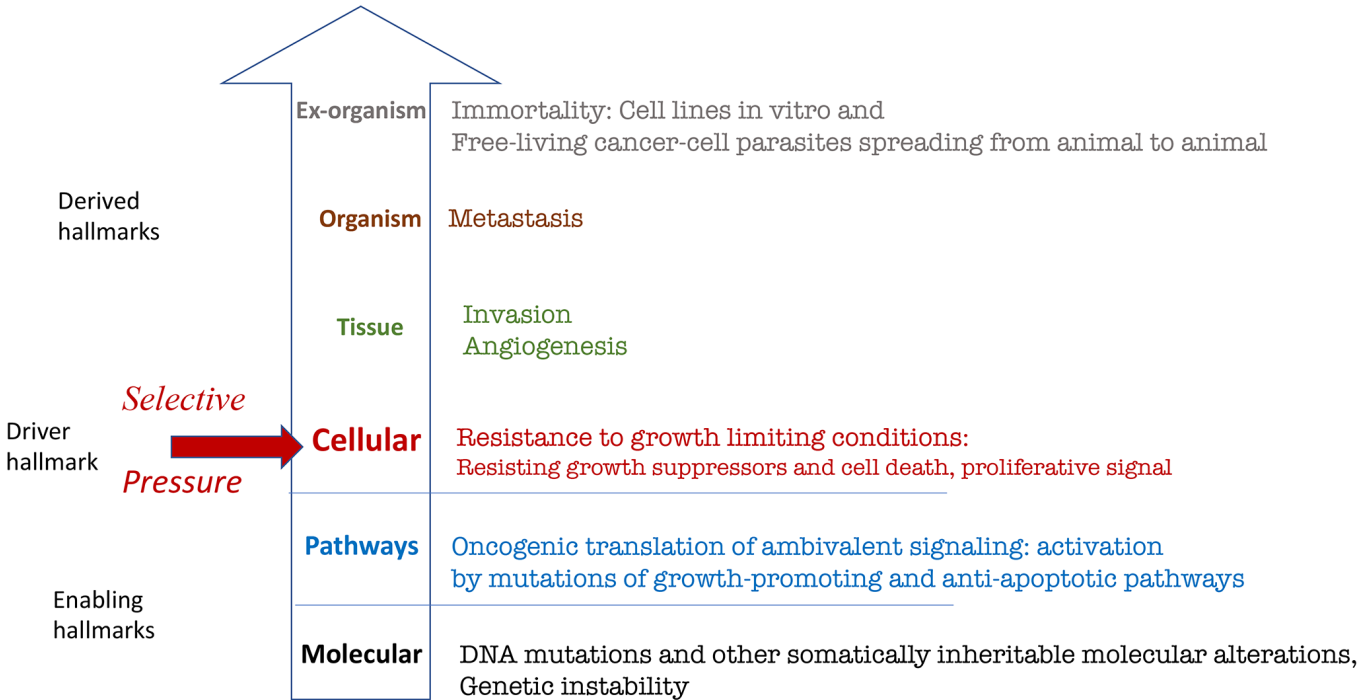

**Figure 1. Hierarchical representation (from molecular to organismal levels) of the original hallmarks of cancer based on Hanahan and Weinberg. See text for explanation.**



[11]. Inactivation of CDK inhibitors such as p16 may translate this ambivalent signaling into proliferation [3, 12]. TGF-beta inhibits normal cell proliferation, but in cancer it can induce proliferation and invasion [7, 13].

Growth-promoting and mitogen/nutrient-sensing signaling pathways are constantly activated by mutations to promote growth and proliferation as well as self-sufficiency in mitogen signaling. This, in turn, is manifested as three hallmarks of cancer on the next hierarchical level: cellular. This trio can be combined as one super-hallmark of resistance to growth-limiting conditions.

#### **Cellular level: Resistance to growth-limiting conditions**

Oncogenic mutations make cancer cells resistant to growth-limiting conditions (a definition of oncogenic-type of resistance was discussed previously [4]). This is the driver hallmark of cancer because it provides a selective advantage to cancer cells. Cells, capable of proliferation, are unicellular organisms in a Darwinian sense [2, 14, 15]. Selection can be “natural” (during carcinogenesis) and “artificial” (during cancer therapy) [14, 16]. For example, selection for therapy resistance increases oncogenic properties of cancer cells because many mutations in oncogenes and tumor suppressors that render cells drug-resistant also make them more oncogenic [5, 17–19]. Simultaneously, the same combination of mutations enables metastasis and other higher-level hallmarks. There is no direct selection for metastatic potential, angiogenesis and immortality. They are derived hallmarks.

#### **Tissue level: Invasion and angiogenesis**

Cancer cells produce cytokines and enzymes, which enable the cells to invade and to attract normal cells of different tissues in order to sustain angiogenesis [7].

#### **Organismal level: Metastasis**

Metastasis is the deadliest hallmark of cancer. Yet, there is no direct selection for metastatic potential. Direct selection for metastatic potential could take place only if metastases produced new metastases; in other words, if metastases reproduce. Simply, selection for cells resistant to growth-limiting conditions (survival and proliferation) brings about mutations that confer not only resistance, but also metastatic potential. There are no specific “metastasis” genes [8, 20]. They are the same oncogenes and tumor suppressors that act on cellular levels for the “trio” hallmark. Let us consider an analogy. If we select people for their ability to run faster, these selected people will also jump higher than

average, although selection was not for jumping ability. The fastest runners are the farthest jumpers.

#### **Extra-organismal level: Cellular immortality**

Some cancer cell lines live for more than half of a century in cell culture and for thousands of years in the wild. Originating in one animal, viable cancer cells are directly transmitted into unrelated hosts in a process similar to metastasis [21, 22]. Transmissible cancers have been observed in domestic dogs, the Tasmanian devil, hamsters and six bivalve species such as the soft-shell clam [23]. Canine transmissible venereal tumors (transmitted during sexual intercourse) may have originated thousands of years ago from the cells of a wolf or East Asian breed of dog [21–25]. The Tasmanian devil facial tumor disease [24] spreads through the Tasmanian devil population by transfer of cancer cells through biting [22]. [26]. Derived from a single original clam, leukemia-like cancer spreads among marine bivalves through sea water, leading to massive population loss [23, 27].

#### **Six levels rather than six hallmarks**

The number of hallmarks of cancer is arbitrary. Some can be combined, and others can be added. Numerous authors have re-visited the hallmarks of cancer, adding hallmarks or suggesting a new set of hallmarks [28–37].

Some hallmarks of cancer may be pseudo-hallmarks. For example, visiting an oncologist is a “hallmark” of cancer. We can be 99% sure that if someone has 20 appointments in an oncology clinic, then this person has cancer. However, it would be ridiculous to include this pseudo-hallmark in Figure 1. And the hierarchical principle makes this impossible, because there is no level (among the six levels) to include it.

#### **Hallmarks of aging**

To start with, let us depict the hallmarks of aging suggested by López-Otín et al. [38] based on the hierarchical principle. This representation renders hallmarks tangible but reveals three shortcomings (Figure 2).

First is the lack of hallmarks on the organismal level. Yet, the main hallmark of organismal aging is age-related diseases in all species from *C. elegans* [39–42] to humans [39, 43]. Aging is the sum of all age-related diseases, which cause death “from aging”.

Second, the relationship between hallmarks on different levels are unclear.

Third, the inclusion of genetic instability as a hallmark is based on the theory that aging is caused by accumulation of molecular damage. The molecular damage theory was refuted by key experiments, as discussed in detail [44–51].

Yes, damage accumulates and is harmful and potentially lethal [52–55] but it is not life-limiting because aging caused by hyper-functional signaling terminates life first. The reason why mTOR-driven aging is life-limiting has been discussed [49, 56, 57].

It was also suggested that the levels of DNA repair needed to avoid cancer at a young age greatly exceeds the levels that are needed to prevent damage-induced aging during a normal lifetime [58]. As previously discussed, the role of molecular damage in cancer supports the role of mTOR-driven hyperfunction in aging [59].

Let us depict hallmarks of aging, according to the hyperfunction theory of aging (Figure 3).

### Hallmarks of aging and hyperfunction theory

The hyperfunction theory of aging was extensively reviewed previously [44, 45, 49, 56, 57, 60–66], and

responses [60, 67] to its critics [68, 69] were also provided.

According to hyperfunction theory, aging is a continuation of developmental and reproductive programs that were not turned off upon their completion. Continuously active signaling pathways that initially drive developmental growth, drive aging later in life. Signaling pathways establish feedback loops, involving also gene expression and epigenetic modifications. These pathways become hyperfunctional, meaning that their activity is higher than optimal for longevity.

How does normal function become a deadly hyperfunction? Consider an analogy. When you pump air into an inflatable balloon, it grows in size. But when it reaches its intended size and you continue to pump air at the same rate, it will not grow further but instead will burst. This event can be compared with a stroke due to hypertension, resulting in brain damage. The brain is not damaged by life-long accumulation of molecular damage, but by hyperfunction, such as hypertension and hypercoagulation, thrombosis.

Hyper-function does not necessarily mean increased function. Even unchanged or slightly decreased activity

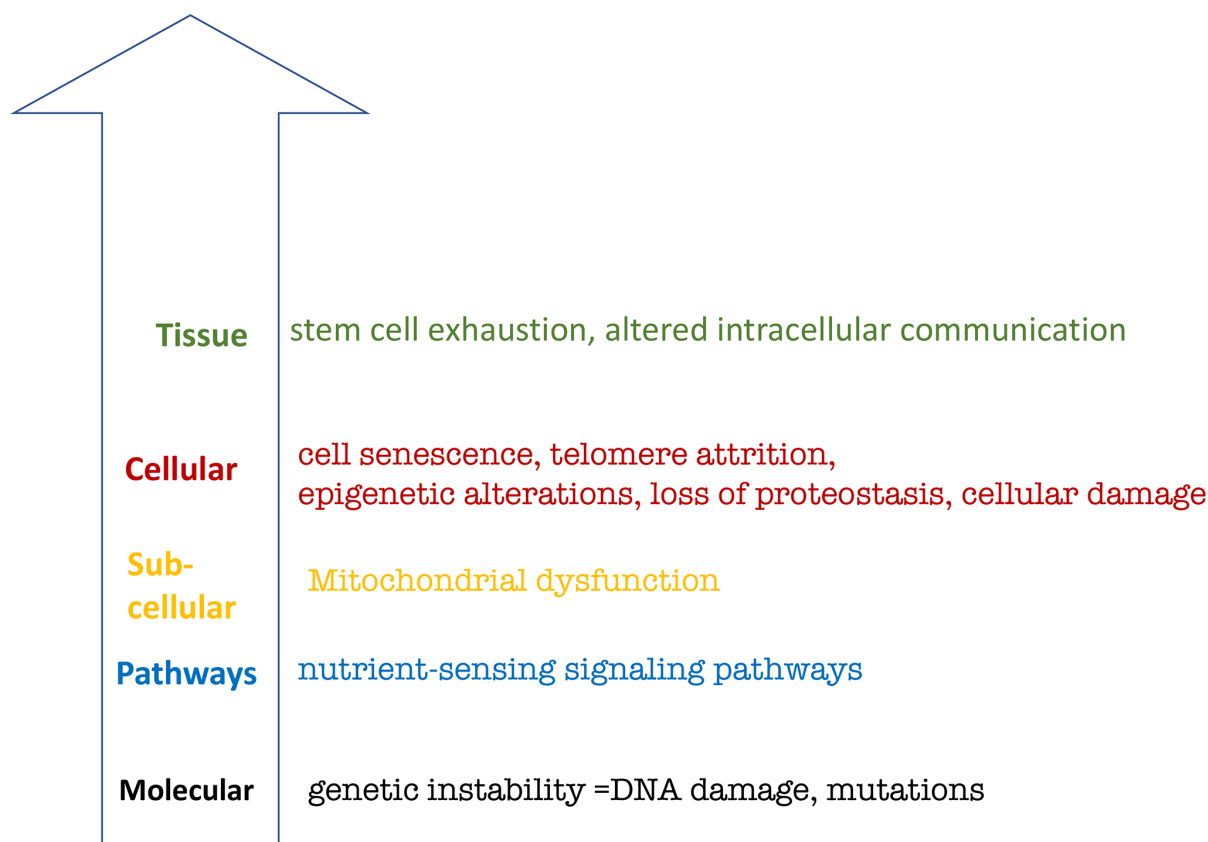

Figure 2. Hierarchical representation of the hallmarks of aging based on López-Otín et al. See text for explanation.

of growth-promoting pathways, such as mTOR, can be hyperfunctional when developmental growth is completed. As an analogy, 55 mph on the highway is not speeding, but even 40 mph on the driveway is too fast.

Hyperfunction causes organ damage and functional decline. The accumulation of molecular damage is associated with decline, but it is hyperfunction that causes decline during a normal lifetime.

Unlike cancer, aging is not a molecular disease. Development is not driven by accumulation of molecular damage or mutations in signaling pathways, and aging is not either. Nutrient-sensing pathways (e.g., mTOR) are not altered by random mutations.

The lowest level of hallmarks of aging is a continuous activation of normal signal transduction pathways. Deactivation of these pathways by knockout of a single gene extends lifespan in animals [70–73]. Rapamycin, a drug that inhibits normal mTOR signaling, extends lifespan [74–77].

Hyperfunctional signaling directly drives age-related diseases. There are no longevity pathways/mechanisms inhibitable by pro-aging pathways such as mTOR. Pro-

aging pathways do not drive aging by inhibiting longevity mechanisms. Why would nature create something that inhibits longevity mechanisms? Pro-aging pathways such as mTOR directly drive age-related diseases because they are a continuation of development.

**The key to understanding aging: life-limiting vs. non-life-limiting hallmarks**

Among numerous harmful processes, only one can be life-limiting in a particular individual. If an animal dies from one cause, it cannot die from another cause even a day later. If quasi-programmed (e.g., mTOR-driven) aging is life-limiting, then accumulation of random damages cannot kill the organism.

López-Otín et al. [38] suggested three criteria for hallmarks of aging but two of them are criteria for both life-limiting and non-life-limiting processes: (1) hallmarks are observed during normal aging and (2) its experimental aggravation should decrease lifespan. However, experimental aggravation can make any process life-limiting. Telomere shortening becomes life-limiting in mice lacking telomerase, but their symptoms are drastically different from normal age-related

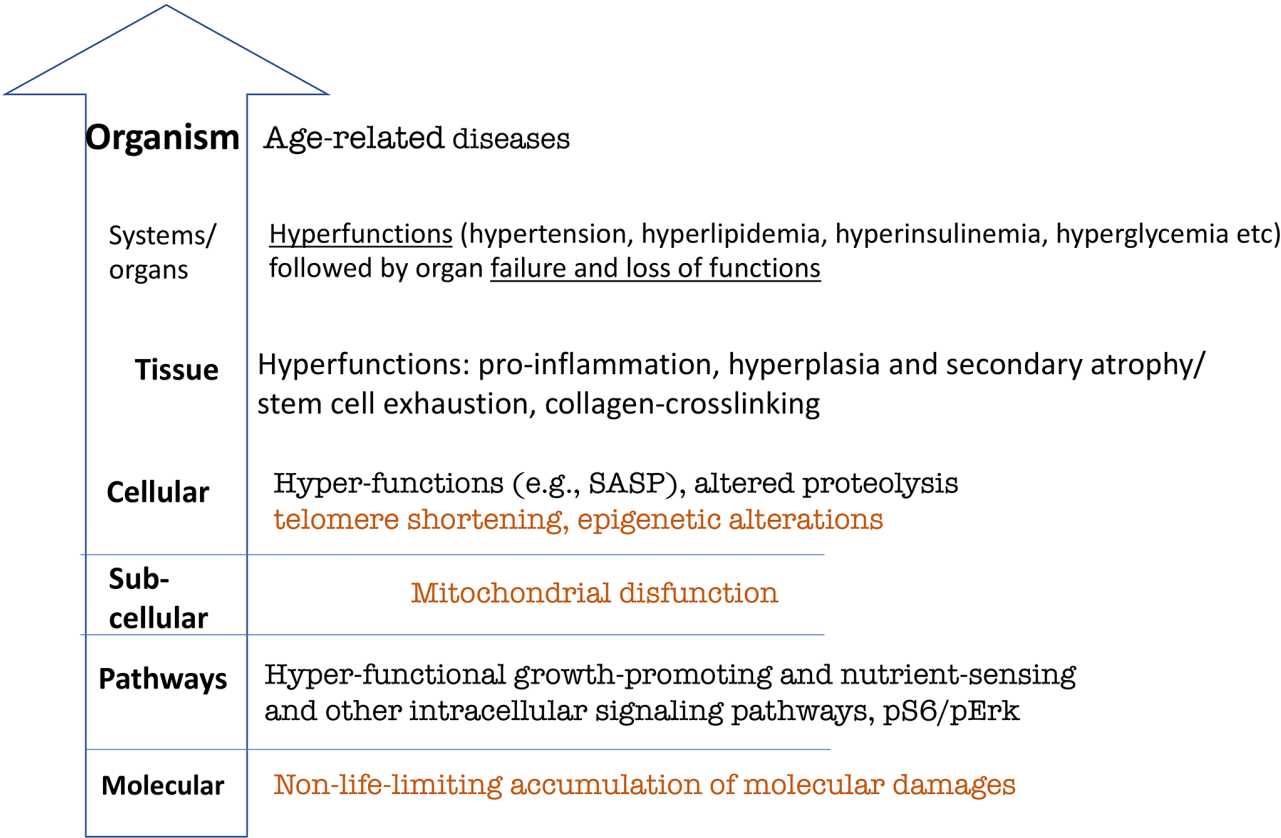

**Figure 3. Hierarchical hallmarks of aging based on hyperfunction theory, applicable to humans.** Non-life-limiting hallmarks are shown in brown color. See text for explanation.

diseases [78]. Although telomere shortening is associated with cardiovascular disease (CVD) in humans, patients with dyskeratosis congenita (DKC), a condition caused by short telomeres, do not die from CVD but from bone marrow failure (which is not a typical age-related disease) [79]. Hyperfunction theory explains how hyper-functional signaling leads to CVD in humans [80]. But telomere shortening cannot explain it.

Anything can shorten lifespan including starvation and the atomic bomb but they are not causes of aging. Only the third criterion matters: (3) its experimental amelioration should slow down aging and increase healthy lifespan. Not surprisingly, “the last criterion is the most difficult to achieve and not all of the hallmarks are fully supported yet by interventions,” as noted by López-Otín et al. [38]. In other words, they are not hallmarks of normal aging.

(Note: Even the third criterion is not sufficient to define a life-limiting hallmark.

Besides interventions may have off-target effects. For example, NAC, an antioxidant, is also a mTOR inhibitor [81]).

In conclusion, numerous deadly processes develop in parallel but only a few (or one) are life-limiting.

Therefore, non-limiting hallmarks are not included in the version of life-limiting hallmarks of aging (Figure 4). This final re-presentation is generic and can be applied to any species, from *C. elegans* to humans.

**Aging as a selective force for cancer**

Common cancers are age-related diseases. This cannot be explained by simple accumulation of mutations with age. For example, melanoma and lung cancer in smokers have atypically high mutation burden [8] but still develop at old age. Centenarians, who age slower, are protected from cancer. Rapamycin and calorie restriction slow aging in mice and prevent cancer.

As discussed, the selective force driving carcinogenesis is growth-limiting conditions, also named micro-environmental constraints in aging [16]. For example, the aging hematopoietic system selects for robust hematopoietic cells and such a preleukemic clone can originate leukemic clone [82]. Specifically, chronic inflammatory microenvironments in old age may select for cells harboring oncogenic mutations [83].

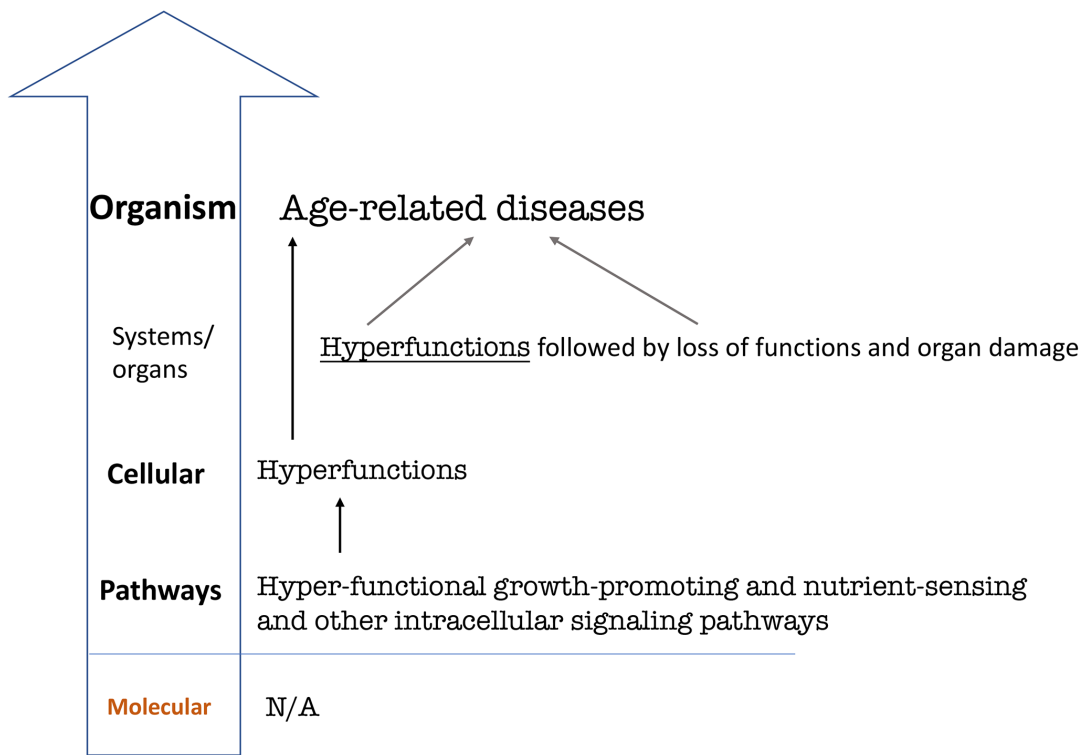

**Figure 4. Hierarchical hallmarks of aging based on hyperfunction theory, universal.** Hyperfunction of intracellular signaling pathways leads to cellular and systemic hyperfunctions, which in turn lead to age-related diseases on the organismal level [56]. Specific hyperfunctions and diseases may be different in different species and therefore are not shown. For example, human systemic hyperfunctions (e.g., hypertension, hyperlipidemia, hyperglycemia) and diseases (e.g., cardio-vascular diseases) differ from diseases in *C. elegans* [40, 41].

Chronic inflammation is a hyper-function and is in part mTOR-dependent [84–88]. An aging microenvironment puts stem cells on the path of hyper-activation [89] and geroconversion [90–92], leading to their exhaustion [89–92].

Mutations are necessary (with a few exceptions) but not sufficient for inducing cancer. The second requirement is selective force, favoring these mutations. Aging is a leading selective force.

One of the potential mechanisms of growth-limiting conditions that drive cancer progression is mTOR-dependent cellular senescence.

### Common hallmarks of cancer, aging and cell senescence

Cellular senescence is a two-step process: cell cycle arrest followed by geroconversion [93]. Like organismal aging, geroconversion is a continuation of growth driven in part by hyperfunctional mTOR. When the cell cycle is blocked by p21/p16, but growth-promoting pathways such as mTOR and MAPK are active, the cells become hypertrophic (large cell morphology) and hyperfunctional: beta-Gal staining (lysosomal hyperfunction) and SASP. A hallmark of cellular senescence is active mTOR pathway in non-proliferating cells. Rapamycin suppresses geroconversion to senescence [93–97]. Figuratively, organismal aging is a quasi-growth after developmental growth is completed.

In cancer, the PI3K/mTOR pathway is almost universally activated by mutations [98–100]. Figuratively, cancer cells are proliferating senescent cells. In organismal aging, cancer and cellular senescence, the same key signaling pathways, such as mTOR, are involved. This is why the same drugs, such as rapamycin, can suppress all of them.

### CONFLICTS OF INTERESTS

The authors declare no conflicts of interest related to this study.

### REFERENCES

1. Hanahan D, Weinberg RA. The hallmarks of cancer. *Cell*. 2000; 100:57–70. [https://doi.org/10.1016/s0092-8674\(00\)81683-9](https://doi.org/10.1016/s0092-8674(00)81683-9) PMID:10647931
2. Cahill DP, Kinzler KW, Vogelstein B, Lengauer C. Genetic instability and darwinian selection in tumours. *Trends Cell Biol*. 1999; 9:M57–60. PMID:10611684
3. Blagosklonny MV. Molecular theory of cancer. *Cancer Biol Ther*. 2005; 4:621–7. <https://doi.org/10.4161/cbt.4.6.1818> PMID:15970666
4. Blagosklonny MV. Oncogenic resistance to growth-limiting conditions. *Nat Rev Cancer*. 2002; 2:221–5. <https://doi.org/10.1038/nrc743> PMID:11990858
5. Blagosklonny MV. Carcinogenesis, cancer therapy and chemoprevention. *Cell Death Differ*. 2005; 12:592–602. <https://doi.org/10.1038/sj.cdd.4401610> PMID:15818400
6. Yun J, Rago C, Cheong I, Pagliarini R, Angenendt P, Rajagopalan H, Schmidt K, Willson JK, Markowitz S, Zhou S, Diaz LA Jr, Velculescu VE, Lengauer C, et al. Glucose deprivation contributes to the development of KRAS pathway mutations in tumor cells. *Science*. 2009; 325:1555–9. <https://doi.org/10.1126/science.1174229> PMID:19661383
7. Hanahan D, Weinberg RA. Hallmarks of cancer: the next generation. *Cell*. 2011; 144:646–74. <https://doi.org/10.1016/j.cell.2011.02.013> PMID:21376230
8. Vogelstein B, Papadopoulos N, Velculescu VE, Zhou S, Diaz LA Jr, Kinzler KW. Cancer genome landscapes. *Science*. 2013; 339:1546–58. <https://doi.org/10.1126/science.1235122> PMID:23539594
9. Gems D, de Magalhães JP. The hoverfly and the wasp: A critique of the hallmarks of aging as a paradigm. *Ageing Res Rev*. 2021; 70:101407. <https://doi.org/10.1016/j.arr.2021.101407> PMID:34271186
10. Bozic I, Antal T, Ohtsuki H, Carter H, Kim D, Chen S, Karchin R, Kinzler KW, Vogelstein B, Nowak MA. Accumulation of driver and passenger mutations during tumor progression. *Proc Natl Acad Sci U S A*. 2010; 107:18545–50. <https://doi.org/10.1073/pnas.1010978107> PMID:20876136
11. Blagosklonny MV. A node between proliferation, apoptosis, and growth arrest. *Bioessays*. 1999; 21:704–9. [https://doi.org/10.1002/\(SICI\)1521-1878\(199908\)21:8<704::AID-BIES10>3.0.CO;2-5](https://doi.org/10.1002/(SICI)1521-1878(199908)21:8<704::AID-BIES10>3.0.CO;2-5) PMID:10440867
12. Maley CC, Galipeau PC, Li X, Sanchez CA, Paulson TG, Reid BJ. Selectively advantageous mutations and hitchhikers in neoplasms: p16 lesions are selected in Barrett's esophagus. *Cancer Res*. 2004; 64:3414–27.



- <https://doi.org/10.1158/0008-5472.CAN-03-3249>  
PMID:15150093
13. Liu X, Sun Y, Ehrlich M, Lu T, Kloog Y, Weinberg RA, Lodish HF, Henis YI. Disruption of TGF-beta growth inhibition by oncogenic ras is linked to p27Kip1 mislocalization. *Oncogene*. 2000; 19:5926–35.  
<https://doi.org/10.1038/sj.onc.1203991>  
PMID:11127824
  14. Nowell PC. The clonal evolution of tumor cell populations. *Science*. 1976; 194:23–8.  
<https://doi.org/10.1126/science.959840>  
PMID:959840
  15. Merlo LM, Pepper JW, Reid BJ, Maley CC. Cancer as an evolutionary and ecological process. *Nat Rev Cancer*. 2006; 6:924–35.  
<https://doi.org/10.1038/nrc2013>  
PMID:17109012
  16. Greaves M, Maley CC. Clonal evolution in cancer. *Nature*. 2012; 481:306–13.  
<https://doi.org/10.1038/nature10762>  
PMID:22258609
  17. Blagosklonny MV. Antiangiogenic therapy and tumor progression. *Cancer Cell*. 2004; 5:13–7.  
[https://doi.org/10.1016/s1535-6108\(03\)00336-2](https://doi.org/10.1016/s1535-6108(03)00336-2)  
PMID:14749122
  18. Blagosklonny MV. Why therapeutic response may not prolong the life of a cancer patient: selection for oncogenic resistance. *Cell Cycle*. 2005; 4:1693–8.  
<https://doi.org/10.4161/cc.4.12.2259>  
PMID:16294046
  19. Pastò A, Pagotto A, Pilotto G, De Paoli A, De Salvo GL, Baldoni A, Nicoletto MO, Ricci F, Damia G, Bellio C, Indraccolo S, Amadori A. Resistance to glucose starvation as metabolic trait of platinum-resistant human epithelial ovarian cancer cells. *Oncotarget*. 2017; 8:6433–45.  
<https://doi.org/10.18632/oncotarget.14118>  
PMID:28031535
  20. Reiter JG, Baretta M, Gerold JM, Makohon-Moore AP, Daud A, Iacobuzio-Donahue CA, Azad NS, Kinzler KW, Nowak MA, Vogelstein B. An analysis of genetic heterogeneity in untreated cancers. *Nat Rev Cancer*. 2019; 19:639–50.  
<https://doi.org/10.1038/s41568-019-0185-x>  
PMID:31455892
  21. Murchison EP. Clonally transmissible cancers in dogs and Tasmanian devils. *Oncogene*. 2008 (Suppl 2); 27:S19–30.  
<https://doi.org/10.1038/ncr.2009.350>  
PMID:19956175
  22. Murchison EP, Schulz-Trieglaff OB, Ning Z, Alexandrov LB, Bauer MJ, Fu B, Hims M, Ding Z, Ivakhno S, Stewart C, Ng BL, Wong W, Aken B, et al. Genome sequencing and analysis of the Tasmanian devil and its transmissible cancer. *Cell*. 2012; 148:780–91.  
<https://doi.org/10.1016/j.cell.2011.11.065>  
PMID:22341448
  23. Lister NC, Milton AM, Hanrahan BJ, Waters PD. Between the Devil and the Deep Blue Sea: Non-Coding RNAs Associated with Transmissible Cancers in Tasmanian Devil, Domestic Dog and Bivalves. *Noncoding RNA*. 2021; 7:72.  
<https://doi.org/10.3390/ncrna7040072>  
PMID:34842768
  24. Ostrander EA, Davis BW, Ostrander GK. Transmissible Tumors: Breaking the Cancer Paradigm. *Trends Genet*. 2016; 32:1–15.  
<https://doi.org/10.1016/j.tig.2015.10.001>  
PMID:26686413
  25. Cohen D. The canine transmissible venereal tumor: a unique result of tumor progression. *Adv Cancer Res*. 1985; 43:75–112.  
[https://doi.org/10.1016/s0065-230x\(08\)60943-4](https://doi.org/10.1016/s0065-230x(08)60943-4)  
PMID:3887857
  26. McCallum H, Jones M, Hawkins C, Hamede R, Lachish S, Sinn DL, Beeton N, Lazenby B. Transmission dynamics of Tasmanian devil facial tumor disease may lead to disease-induced extinction. *Ecology*. 2009; 90:3379–92.  
<https://doi.org/10.1890/08-1763.1>  
PMID:20120807
  27. Metzger MJ, Reinisch C, Sherry J, Goff SP. Horizontal transmission of clonal cancer cells causes leukemia in soft-shell clams. *Cell*. 2015; 161:255–63.  
<https://doi.org/10.1016/j.cell.2015.02.042>  
PMID:25860608
  28. Hanahan D. Hallmarks of Cancer: New Dimensions. *Cancer Discov*. 2022; 12:31–46.  
<https://doi.org/10.1158/2159-8290.CD-21-1059>  
PMID:35022204
  29. Fouad YA, Aanei C. Revisiting the hallmarks of cancer. *Am J Cancer Res*. 2017; 7:1016–36.  
PMID:28560055
  30. Senga SS, Grose RP. Hallmarks of cancer-the new testament. *Open Biol*. 2021; 11:200358.  
<https://doi.org/10.1098/rsob.200358>  
PMID:33465324
  31. Munkley J, Elliott DJ. Hallmarks of glycosylation in cancer. *Oncotarget*. 2016; 7:35478–89.  
<https://doi.org/10.18632/oncotarget.8155>  
PMID:27007155
  32. Flavahan WA, Gaskell E, Bernstein BE. Epigenetic plasticity and the hallmarks of cancer. *Science*. 2017;

- 357:eaal2380.  
<https://doi.org/10.1126/science.aal2380>  
PMID:[28729483](https://pubmed.ncbi.nlm.nih.gov/28729483/)
33. MacCarthy-Morrogh L, Martin P. The hallmarks of cancer are also the hallmarks of wound healing. *Sci Signal*. 2020; 13:eaay8690.  
<https://doi.org/10.1126/scisignal.aay8690>  
PMID:[32900881](https://pubmed.ncbi.nlm.nih.gov/32900881/)
34. Kroemer G, Pouyssegur J. Tumor cell metabolism: cancer's Achilles' heel. *Cancer Cell*. 2008; 13:472–82.  
<https://doi.org/10.1016/j.ccr.2008.05.005>  
PMID:[18538731](https://pubmed.ncbi.nlm.nih.gov/18538731/)
35. Colotta F, Allavena P, Sica A, Garlanda C, Mantovani A. Cancer-related inflammation, the seventh hallmark of cancer: links to genetic instability. *Carcinogenesis*. 2009; 30:1073–81.  
<https://doi.org/10.1093/carcin/bgp127>  
PMID:[19468060](https://pubmed.ncbi.nlm.nih.gov/19468060/)
36. Baraks G, Tseng R, Pan CH, Kasliwal S, Leiton CV, Shroyer KR, Escobar-Hoyos LF. Dissecting the Oncogenic Roles of Keratin 17 in the Hallmarks of Cancer. *Cancer Res*. 2022; 82:1159–66.  
<https://doi.org/10.1158/0008-5472.CAN-21-2522>  
PMID:[34921015](https://pubmed.ncbi.nlm.nih.gov/34921015/)
37. Rassy E, Assi T, Pavlidis N. Exploring the biological hallmarks of cancer of unknown primary: where do we stand today? *Br J Cancer*. 2020; 122:1124–32.  
<https://doi.org/10.1038/s41416-019-0723-z>  
PMID:[32042068](https://pubmed.ncbi.nlm.nih.gov/32042068/)
38. López-Otín C, Blasco MA, Partridge L, Serrano M, Kroemer G. The hallmarks of aging. *Cell*. 2013; 153:1194–217.  
<https://doi.org/10.1016/j.cell.2013.05.039>  
PMID:[23746838](https://pubmed.ncbi.nlm.nih.gov/23746838/)
39. Gems D. The aging-disease false dichotomy: understanding senescence as pathology. *Front Genet*. 2015; 6:212.  
<https://doi.org/10.3389/fgene.2015.00212>  
PMID:[26136770](https://pubmed.ncbi.nlm.nih.gov/26136770/)
40. Ezcurra M, Benedetto A, Sornda T, Gilliat AF, Au C, Zhang Q, van Schelt S, Petrache AL, Wang H, de la Guardia Y, Bar-Nun S, Tyler E, Wakelam MJ, Gems D. *C. elegans* Eats Its Own Intestine to Make Yolk Leading to Multiple Senescent Pathologies. *Curr Biol*. 2018; 28:2544–56.e5.  
<https://doi.org/10.1016/j.cub.2018.06.035>  
PMID:[30100339](https://pubmed.ncbi.nlm.nih.gov/30100339/)
41. Wang H, Zhang Z, Gems D. Monsters in the uterus: teratoma-like tumors in senescent *C. elegans* result from a parthenogenetic quasi-program. *Aging (Albany NY)*. 2018; 10:1188–9.  
<https://doi.org/10.18632/aging.101486>  
PMID:[29923830](https://pubmed.ncbi.nlm.nih.gov/29923830/)
42. Wang H, Zhao Y, Ezcurra M, Benedetto A, Gilliat AF, Hellberg J, Ren Z, Galimov ER, Athigapanich T, Girstmair J, Telford MJ, Dolphin CT, Zhang Z, Gems D. A parthenogenetic quasi-program causes teratoma-like tumors during aging in wild-type *C. elegans*. *NPJ Aging Mech Dis*. 2018; 4:6.  
<https://doi.org/10.1038/s41514-018-0025-3>  
PMID:[29928508](https://pubmed.ncbi.nlm.nih.gov/29928508/)
43. Blagosklonny MV. Validation of anti-aging drugs by treating age-related diseases. *Aging (Albany NY)*. 2009; 1:281–8.  
<https://doi.org/10.18632/aging.100034>  
PMID:[20157517](https://pubmed.ncbi.nlm.nih.gov/20157517/)
44. Gems D, de la Guardia Y. Alternative Perspectives on Aging in *Caenorhabditis elegans*: Reactive Oxygen Species or Hyperfunction? *Antioxid Redox Signal*. 2013; 19:321–9.  
<https://doi.org/10.1089/ars.2012.4840>  
PMID:[22870907](https://pubmed.ncbi.nlm.nih.gov/22870907/)
45. Gems D, Partridge L. Genetics of longevity in model organisms: debates and paradigm shifts. *Annu Rev Physiol*. 2013; 75:621–44.  
<https://doi.org/10.1146/annurev-physiol-030212-183712>  
PMID:[23190075](https://pubmed.ncbi.nlm.nih.gov/23190075/)
46. Doonan R, McElwee JJ, Matthijssens F, Walker GA, Houthoofd K, Back P, Matscheski A, Vanfleteren JR, Gems D. Against the oxidative damage theory of aging: superoxide dismutases protect against oxidative stress but have little or no effect on life span in *Caenorhabditis elegans*. *Genes Dev*. 2008; 22:3236–41.  
<https://doi.org/10.1101/gad.504808>  
PMID:[19056880](https://pubmed.ncbi.nlm.nih.gov/19056880/)
47. Ng LF, Ng LT, van Breugel M, Halliwell B, Gruber J. Mitochondrial DNA Damage Does Not Determine *C. elegans* Lifespan. *Front Genet*. 2019; 10:311.  
<https://doi.org/10.3389/fgene.2019.00311>  
PMID:[31031801](https://pubmed.ncbi.nlm.nih.gov/31031801/)
48. Blagosklonny MV. Aging: ROS or TOR. *Cell Cycle*. 2008; 7:3344–54.  
<https://doi.org/10.4161/cc.7.21.6965>  
PMID:[18971624](https://pubmed.ncbi.nlm.nih.gov/18971624/)
49. Blagosklonny MV. DNA- and telomere-damage does not limit lifespan: evidence from rapamycin. *Aging (Albany NY)*. 2021; 13:3167–75.  
<https://doi.org/10.18632/aging.202674>  
PMID:[33578394](https://pubmed.ncbi.nlm.nih.gov/33578394/)
50. Lapointe J, Hekimi S. When a theory of aging ages badly. *Cell Mol Life Sci*. 2010; 67:1–8.  
<https://doi.org/10.1007/s00018-009-0138-8>



PMID:[19730800](https://pubmed.ncbi.nlm.nih.gov/19730800/)

51. Ristow M, Schmeisser S. Extending life span by increasing oxidative stress. *Free Radic Biol Med*. 2011; 51:327–36.  
<https://doi.org/10.1016/j.freeradbiomed.2011.05.010>  
PMID:[21619928](https://pubmed.ncbi.nlm.nih.gov/21619928/)
52. Gladyshev VN. The free radical theory of aging is dead. Long live the damage theory! *Antioxid Redox Signal*. 2014; 20:727–31.  
<https://doi.org/10.1089/ars.2013.5228>  
PMID:[24159899](https://pubmed.ncbi.nlm.nih.gov/24159899/)
53. Golubev A, Hanson AD, Gladyshev VN. Non-enzymatic molecular damage as a prototypic driver of aging. *J Biol Chem*. 2017; 292:6029–38.  
<https://doi.org/10.1074/jbc.R116.751164>  
PMID:[28264930](https://pubmed.ncbi.nlm.nih.gov/28264930/)
54. Schumacher B, Pothof J, Vijg J, Hoeijmakers JHJ. The central role of DNA damage in the ageing process. *Nature*. 2021; 592:695–703.  
<https://doi.org/10.1038/s41586-021-03307-7>  
PMID:[33911272](https://pubmed.ncbi.nlm.nih.gov/33911272/)
55. MacRae SL, Croken MM, Calder RB, Aliper A, Milholland B, White RR, Zhavoronkov A, Gladyshev VN, Seluanov A, Gorbunova V, Zhang ZD, Vijg J. DNA repair in species with extreme lifespan differences. *Aging (Albany NY)*. 2015; 7:1171–84.  
<https://doi.org/10.18632/aging.100866>  
PMID:[26729707](https://pubmed.ncbi.nlm.nih.gov/26729707/)
56. Blagosklonny MV. Aging and immortality: quasi-programmed senescence and its pharmacologic inhibition. *Cell Cycle*. 2006; 5:2087–102.  
<https://doi.org/10.4161/cc.5.18.3288>  
PMID:[17012837](https://pubmed.ncbi.nlm.nih.gov/17012837/)
57. Blagosklonny MV. The hyperfunction theory of aging: three common misconceptions. *Oncoscience*. 2021; 8:103–7.  
<https://doi.org/10.18632/oncoscience.545>  
PMID:[34549076](https://pubmed.ncbi.nlm.nih.gov/34549076/)
58. de Grey AD. Protagonistic pleiotropy: Why cancer may be the only pathogenic effect of accumulating nuclear mutations and epimutations in aging. *Mech Ageing Dev*. 2007; 128:456–9.  
<https://doi.org/10.1016/j.mad.2007.05.005>  
PMID:[17588643](https://pubmed.ncbi.nlm.nih.gov/17588643/)
59. Blagosklonny MV. Molecular damage in cancer: an argument for mTOR-driven aging. *Aging (Albany NY)*. 2011; 3:1130–41.  
<https://doi.org/10.18632/aging.100422>  
PMID:[22246147](https://pubmed.ncbi.nlm.nih.gov/22246147/)
60. Blagosklonny MV. Response to the Thought-Provoking Critique of Hyperfunction Theory by Aubrey de Grey. *Rejuvenation Res*. 2021; 24:170–2.  
<https://doi.org/10.1089/rej.2021.0018>  
PMID:[33784825](https://pubmed.ncbi.nlm.nih.gov/33784825/)
61. Gems D. The hyperfunction theory: An emerging paradigm for the biology of aging. *Ageing Res Rev*. 2022; 74:101557.  
<https://doi.org/10.1016/j.arr.2021.101557>  
PMID:[34990845](https://pubmed.ncbi.nlm.nih.gov/34990845/)
62. Lind MI, Ravindran S, Sekajova Z, Carlsson H, Hinas A, Maklakov AA. Experimentally reduced insulin/IGF-1 signaling in adulthood extends lifespan of parents and improves Darwinian fitness of their offspring. *Evol Lett*. 2019; 3:207–16.  
<https://doi.org/10.1002/evl3.108>  
PMID:[31007945](https://pubmed.ncbi.nlm.nih.gov/31007945/)
63. Berman AE, Leontieva OV, Natarajan V, McCubrey JA, Demidenko ZN, Nikiforov MA. Recent progress in genetics of aging, senescence and longevity: focusing on cancer-related genes. *Oncotarget*. 2012; 3:1522–32.  
<https://doi.org/10.18632/oncotarget.889>  
PMID:[23455653](https://pubmed.ncbi.nlm.nih.gov/23455653/)
64. Iseghohi SO, Omeke K. How ageing increases cancer susceptibility: A tale of two opposing yet synergistic views. *Genes Dis*. 2016; 3:105–9.  
<https://doi.org/10.1016/j.gendis.2016.04.002>  
PMID:[30258879](https://pubmed.ncbi.nlm.nih.gov/30258879/)
65. Scialò F, Sriram A, Naudí A, Ayala V, Jové M, Pamplona R, Sanz A. Target of rapamycin activation predicts lifespan in fruit flies. *Cell Cycle*. 2015; 14:2949–58.  
<https://doi.org/10.1080/15384101.2015.1071745>  
PMID:[26259964](https://pubmed.ncbi.nlm.nih.gov/26259964/)
66. Biliński T, Paszkiewicz T, Zadrag-Tecza R. Energy excess is the main cause of accelerated aging of mammals. *Oncotarget*. 2015; 6:12909–19.  
<https://doi.org/10.18632/oncotarget.4271>  
PMID:[26079722](https://pubmed.ncbi.nlm.nih.gov/26079722/)
67. Blagosklonny MV. Answering the ultimate question "what is the proximal cause of aging?". *Aging (Albany NY)*. 2012; 4:861–77.  
<https://doi.org/10.18632/aging.100525>  
PMID:[23425777](https://pubmed.ncbi.nlm.nih.gov/23425777/)
68. Zimniak P. What is the Proximal Cause of Aging? *Front Genet*. 2012; 3:189.  
<https://doi.org/10.3389/fgene.2012.00189>  
PMID:[23056007](https://pubmed.ncbi.nlm.nih.gov/23056007/)
69. de Grey ADN. Programs, Hyperfunction, and Damage: Why Definitions and Logic Matter So Much in Biogerontology. *Rejuvenation Res*. 2021; 24:83–5.  
<https://doi.org/10.1089/rej.2021.0015>  
PMID:[33784821](https://pubmed.ncbi.nlm.nih.gov/33784821/)
70. Kenyon CJ. The genetics of ageing. *Nature*. 2010;

464:504–12.

<https://doi.org/10.1038/nature08980>

PMID:20336132

71. Vellai T, Takacs-Vellai K, Zhang Y, Kovacs AL, Orosz L, Müller F. Genetics: influence of TOR kinase on lifespan in *C. elegans*. *Nature*. 2003; 426:620.  
<https://doi.org/10.1038/426620a>  
PMID:14668850
72. Bartke A, Quainoo N. Impact of Growth Hormone-Related Mutations on Mammalian Aging. *Front Genet*. 2018; 9:586.  
<https://doi.org/10.3389/fgene.2018.00586>  
PMID:30542372
73. Selman C, Tullet JM, Wieser D, Irvine E, Lingard SJ, Choudhury AI, Claret M, Al-Qassab H, Carmignac D, Ramadani F, Woods A, Robinson IC, Schuster E, et al. Ribosomal protein S6 kinase 1 signaling regulates mammalian life span. *Science*. 2009; 326:140–4.  
<https://doi.org/10.1126/science.1177221>  
PMID:19797661
74. Harrison DE, Strong R, Sharp ZD, Nelson JF, Astle CM, Flurkey K, Nadon NL, Wilkinson JE, Frenkel K, Carter CS, Pahor M, Javors MA, Fernandez E, Miller RA. Rapamycin fed late in life extends lifespan in genetically heterogeneous mice. *Nature*. 2009; 460:392–5.  
<https://doi.org/10.1038/nature08221>  
PMID:19587680
75. Anisimov VN, Zabezhinski MA, Popovich IG, Piskunova TS, Semchenko AV, Tyndyk ML, Yurova MN, Antoch MP, Blagosklonny MV. Rapamycin extends maximal lifespan in cancer-prone mice. *Am J Pathol*. 2010; 176:2092–7.  
<https://doi.org/10.2353/ajpath.2010.091050>  
PMID:20363920
76. Bitto A, Ito TK, Pineda VV, LeTexier NJ, Huang HZ, Sutlief E, Tung H, Vizzini N, Chen B, Smith K, Meza D, Yajima M, Beyer RP, et al. Transient rapamycin treatment can increase lifespan and healthspan in middle-aged mice. *Elife*. 2016; 5:e16351.  
<https://doi.org/10.7554/eLife.16351>  
PMID:27549339
77. Strong R, Miller RA, Bogue M, Fernandez E, Javors MA, Libert S, Martinez PA, Murphy MP, Musi N, Nelson JF, Petrascheck M, Reifsnnyder P, Richardson A, et al. Rapamycin-mediated mouse lifespan extension: Late-life dosage regimes with sex-specific effects. *Aging Cell*. 2020; 19:e13269.  
<https://doi.org/10.1111/acer.13269>  
PMID:33145977
78. Herrera E, Samper E, Martín-Caballero J, Flores JM, Lee HW, Blasco MA. Disease states associated with telomerase deficiency appear earlier in mice with short telomeres. *EMBO J*. 1999; 18:2950–60.  
<https://doi.org/10.1093/emboj/18.11.2950>  
PMID:10357808
79. Gramatges MM, Bertuch AA. Short telomeres: from dyskeratosis congenita to sporadic aplastic anemia and malignancy. *Transl Res*. 2013; 162:353–63.  
<https://doi.org/10.1016/j.trsl.2013.05.003>  
PMID:23732052
80. Blagosklonny MV. Prospective treatment of age-related diseases by slowing down aging. *Am J Pathol*. 2012; 181:1142–6.  
<https://doi.org/10.1016/j.ajpath.2012.06.024>  
PMID:22841821
81. Lai ZW, Hanczko R, Bonilla E, Caza TN, Clair B, Bartos A, Miklossy G, Jimah J, Doherty E, Tily H, Francis L, Garcia R, Dawood M, et al. N-acetylcysteine reduces disease activity by blocking mammalian target of rapamycin in T cells from systemic lupus erythematosus patients: a randomized, double-blind, placebo-controlled trial. *Arthritis Rheum*. 2012; 64:2937–46.  
<https://doi.org/10.1002/art.34502>  
PMID:22549432
82. Shlush LI, Minden MD. Preleukemia: the normal side of cancer. *Curr Opin Hematol*. 2015; 22:77–84.  
<https://doi.org/10.1097/MOH.0000000000000111>  
PMID:25575035
83. Henry CJ, Casás-Selves M, Kim J, Zaberezhnyy V, Aghili L, Daniel AE, Jimenez L, Azam T, McNamee EN, Clambey ET, Klawitter J, Serkova NJ, Tan AC, et al. Aging-associated inflammation promotes selection for adaptive oncogenic events in B cell progenitors. *J Clin Invest*. 2015; 125:4666–80.  
<https://doi.org/10.1172/JCI83024>  
PMID:26551682
84. Laberge RM, Sun Y, Orjalo AV, Patil CK, Freund A, Zhou L, Curran SC, Davalos AR, Wilson-Edell KA, Liu S, Limbad C, Demaria M, Li P, et al. MTOR regulates the pro-tumorigenic senescence-associated secretory phenotype by promoting IL1A translation. *Nat Cell Biol*. 2015; 17:1049–61.  
<https://doi.org/10.1038/ncb3195>  
PMID:26147250
85. Choi YJ, Moon KM, Chung KW, Jeong JW, Park D, Kim DH, Yu BP, Chung HY. The underlying mechanism of proinflammatory NF- $\kappa$ B activation by the mTORC2/Akt/IKK $\alpha$  pathway during skin aging. *Oncotarget*. 2016; 7:52685–94.  
<https://doi.org/10.18632/oncotarget.10943>  
PMID:27486771
86. Wang R, Sunchu B, Perez VI. Rapamycin and the

- inhibition of the secretory phenotype. *Exp Gerontol*. 2017; 94:89–92.  
<https://doi.org/10.1016/j.exger.2017.01.026>  
 PMID:28167236
87. Wang R, Yu Z, Sunchu B, Shoaf J, Dang I, Zhao S, Caples K, Bradley L, Beaver LM, Ho E, Löhr CV, Perez VI. Rapamycin inhibits the secretory phenotype of senescent cells by a Nrf2-independent mechanism. *Aging Cell*. 2017; 16:564–74.  
<https://doi.org/10.1111/acer.12587>  
 PMID:28371119
  88. Bent EH, Gilbert LA, Hemann MT. A senescence secretory switch mediated by PI3K/AKT/mTOR activation controls chemoprotective endothelial secretory responses. *Genes Dev*. 2016; 30:1811–21.  
<https://doi.org/10.1101/gad.284851.116>  
 PMID:27566778
  89. Rodgers JT, King KY, Brett JO, Cromie MJ, Charville GW, Maguire KK, Brunson C, Mastey N, Liu L, Tsai CR, Goodell MA, Rando TA. mTORC1 controls the adaptive transition of quiescent stem cells from G0 to G(Alert). *Nature*. 2014; 510:393–6.  
<https://doi.org/10.1038/nature13255>  
 PMID:24870234
  90. Sousa-Victor P, Gutarra S, García-Prat L, Rodriguez-Ubrea J, Ortet L, Ruiz-Bonilla V, Jardí M, Ballestar E, González S, Serrano AL, Perdiguero E, Muñoz-Cánoves P. Geriatric muscle stem cells switch reversible quiescence into senescence. *Nature*. 2014; 506:316–21.  
<https://doi.org/10.1038/nature13013>  
 PMID:24522534
  91. Sousa-Victor P, Perdiguero E, Muñoz-Cánoves P. Geroconversion of aged muscle stem cells under regenerative pressure. *Cell Cycle*. 2014; 13:3183–90.  
<https://doi.org/10.4161/15384101.2014.965072>  
 PMID:25485497
  92. Yue F, Bi P, Wang C, Li J, Liu X, Kuang S. Conditional Loss of Pten in Myogenic Progenitors Leads to Postnatal Skeletal Muscle Hypertrophy but Age-Dependent Exhaustion of Satellite Cells. *Cell Rep*. 2016; 17:2340–53.  
<https://doi.org/10.1016/j.celrep.2016.11.002>  
 PMID:27880908
  93. Blagosklonny MV. Rapamycin, proliferation and geroconversion to senescence. *Cell Cycle*. 2018; 17:2655–65.  
<https://doi.org/10.1080/15384101.2018.1554781>  
 PMID:30541374
  94. Demidenko ZN, Zubova SG, Bukreeva EI, Pospelov VA, Pospelova TV, Blagosklonny MV. Rapamycin decelerates cellular senescence. *Cell Cycle*. 2009; 8:1888–95.  
<https://doi.org/10.4161/cc.8.12.8606>  
 PMID:19471117
  95. Dulic V. Senescence regulation by mTOR. *Methods Mol Biol*. 2013; 965:15–35.  
[https://doi.org/10.1007/978-1-62703-239-1\\_2](https://doi.org/10.1007/978-1-62703-239-1_2)  
 PMID:23296649
  96. Houssaini A, Breau M, Kebe K, Abid S, Marcos E, Lipskaia L, Rideau D, Parpaleix A, Huang J, Amsellem V, Vienney N, Validire P, Maitre B, et al. mTOR pathway activation drives lung cell senescence and emphysema. *JCI Insight*. 2018; 3:93203.  
<https://doi.org/10.1172/jci.insight.93203>  
 PMID:29415880
  97. Maskey RS, Wang F, Lehman E, Wang Y, Emmanuel N, Zhong W, Jin G, Abraham RT, Arndt KT, Myers JS, Mazurek A. Sustained mTORC1 activity during palbociclib-induced growth arrest triggers senescence in ER+ breast cancer cells. *Cell Cycle*. 2021; 20:65–80.  
<https://doi.org/10.1080/15384101.2020.1859195>  
 PMID:33356791
  98. Mossmann D, Park S, Hall MN. mTOR signalling and cellular metabolism are mutual determinants in cancer. *Nat Rev Cancer*. 2018; 18:744–57.  
<https://doi.org/10.1038/s41568-018-0074-8>  
 PMID:30425336
  99. Millis SZ, Jardim DL, Albacker L, Ross JS, Miller VA, Ali SM, Kurzrock R. Phosphatidylinositol 3-kinase pathway genomic alterations in 60,991 diverse solid tumors informs targeted therapy opportunities. *Cancer*. 2019; 125:1185–99.  
<https://doi.org/10.1002/cncr.31921>  
 PMID:30582752
  100. Schmidt-Kittler O, Zhu J, Yang J, Liu G, Hendricks W, Lengauer C, Gabelli SB, Kinzler KW, Vogelstein B, Huso DL, Zhou S. PI3Kα inhibitors that inhibit metastasis. *Oncotarget*. 2010; 1:339–48.  
<https://doi.org/10.18632/oncotarget.166>  
 PMID:21179398

# As predicted by hyperfunction theory, rapamycin treatment during development extends lifespan

Mikhail V. Blagosklonny<sup>1</sup>

<sup>1</sup>Roswell Park Comprehensive Cancer Center, Buffalo, NY 14263, USA

**Correspondence to:** Mikhail V. Blagosklonny; **email:** [Blagosklonny@oncotarget.com](mailto:Blagosklonny@oncotarget.com), [Blagosklonny@rapalogs.com](mailto:Blagosklonny@rapalogs.com)

**Keywords:** quasi-programmed aging, mTOR, sirolimus, growth, reprogramming

**Received:** March 2, 2022      **Accepted:** March 5, 2022      **Published:** March 5, 2022

**Copyright:** © 2022 Blagosklonny. This is an open-access article distributed under the terms of the Creative Commons Attribution License (CC BY 3.0), which permits unrestricted use, distribution, and reproduction in any medium, provided the original author and source are credited.

As suggested in 2006, by slowing down the mTOR-driven developmental program, rapamycin must slow down quasi-programmed aging [1]. In other words, targeting development with rapamycin must lead to a longer lifespan. An elegant study by Gladyshev and co-workers has confirmed this prediction [2].

According to hyper-function theory, aging is a quasi-program, a purposeless continuation of the growth program that has not been switched off upon its completion [1]. Aging is not programmed, only development is. Unlike a program, a quasi-program has no aim, although, like a program, it can be modulated [1, 3, 4]. For example, excessive nutrients and calorie restriction can accelerate and decelerate aging, respectively.

Aging is driven by hyperfunctional signal-transduction pathways which, via cellular and systemic hyperfunctions, cause age-related diseases, whose sum is called aging [1]. Hyperfunctions cause organ damage (not molecular damage), resulting in loss of functions and secondary functional decline [1, 5].

The nutrient-sensing mTOR pathway promotes cellular growth [6-8] and cellular senescence, which is a continuation of cellular growth, when the cell cycle is blocked [9, 10]. According to hyperfunction theory, age-related diseases are quasi-programmed [1,11] with clear-cut examples in simple organisms such as *C. elegans* [11-15]. Hyperfunction theory was extensively reviewed [1, 5, 11, 16 -20]. Critical comments [21-23] have been addressed [5, 24]. Importantly,

hyperfunction theory is mTOR-centric, describing mTOR-driven aging and its diseases [1]. By slowing down aging, rapamycin delays age-related diseases [1, 25, 26].

To maximally extend health and lifespan in humans, it was suggested that the treatment with rapamycin should be started at a young age: “As an anti-aging drug, rapamycin will prevent diseases rather than cure complications of diseases. Rapamycin will prevent [organ] damage but not to reverse damage. It might prevent diabetes and obesity but not diabetic gangrene and stroke. It might prevent macular degeneration but will unlikely cure blindness. Rapamycin will not repair broken bones but might prevent osteoporosis... rapamycin will be most useful as [an] anti-aging drug to slow down senescence and to prevent diseases” [1].

It was suggested in 2006 to take rapamycin immediately to the clinic to suppress human aging [1], even though longevity studies in animals were not yet performed. Starting from 2009, numerous studies demonstrated that rapamycin extends lifespan in mice [27-39].

Hyperfunction theory predicts that rapamycin can slow down aging by two complementary mechanisms:

- (a) directly suppressing the quasi-program of aging
- b) reprogramming aging by slowing the developmental-growth program

To demonstrate reprogramming, rapamycin should be given for a brief period during development.

Shindyapina et al. showed that treatment with rapamycin for the first 45 days of life extends median lifespan by 10% [2]. Health was improved as measured by gait speed, frailty index, and glucose and insulin tolerance tests [2]. Rapamycin-treated mice were small and did not catch up on growth later [2].

The hyperfunction theory explains why a large-body correlates with longevity between species (for example, elephants live longer than mice, which live longer than flies), but in contrast, within each species, it is a small body size that is associated with longevity [40]. Life-long small body size after a brief treatment is consistent with reprogramming of the growth program.

Notably, life extension by rapamycin was mostly observed in male mice [2]. This is consistent with the finding that mTOR is overactivated in young male mice compared with young female mice, thus explaining robustness of males at young age and their shorter lifespan [41].

Supporting the notion of rapamycin-induced reprogramming, previous studies found that (a) even transient treatment with rapamycin can extend lifespan [27, 36, 39] (b) a single rapamycin injection can lower body weight set point in the long run [42] and (c) rapamycin can affect the mTOR pathway activity long term by preventing obesity [43, 44].

### Further suggestions

To further study rapamycin-induced reprogramming of aging, pregnant mice should be treated with a single subcutaneous injection of rapamycin and the lifespan of their offspring should be measured. Prenatal (before birth) rapamycin treatment on early postnatal development has been studied [45-47]. For example, prenatally rapamycin-treated neonates are small, and body weight and left ventricular mass remain reduced in adulthood [47]. However, lifespan was not measured. (Note: rapamycin pre-treatment increased mortality immediately after the birth [47] because mTOR is essential early in life. Early-life death is not aging-driven and should be excluded from the age-related mortality curve).

At what age may rapamycin treatment be started in order to maximally extend human lifespan? Based on murine data, treatment with rapamycin can be started at a very old age. Still, in theory, the maximal effect potentially may be achieved before age-related diseases and pre-diseases become apparent in humans [1].

However, it should not be started too early because mTOR is essential for growth and early life fitness. In my opinion, rapamycin treatment (for anti-aging purposes) may only be started when a young adult can make informed decisions and should not be allowed before the age of 21. Doctors should consider that rapamycin may negatively affect reproduction, albeit reversibly. I believe that the initial dose should be very low and gradually increase with older age, when full individual doses are achieved. An anti-aging dose/schedule is a maximum dose that do not yet cause side effects in a particular person [48]. Self-treatment is unacceptable and doses are highly individual [48, 49].

### Disclaimer

This commentary is for information purposes, not medical advice.

### CONFLICTS OF INTEREST

The author declares no conflicts of interest.

### REFERENCES

1. Blagosklonny MV. Aging and immortality: quasi-programmed senescence and its pharmacologic inhibition. *Cell Cycle*. 2006; 5:2087–102. <https://doi.org/10.4161/cc.5.18.3288> PMID:[17012837](https://pubmed.ncbi.nlm.nih.gov/17012837/)
2. Shindyapina AV, Cho Y, Kaya A, Tyshkovskiy A, Castro JP, Gordevicius J, et al. Rapamycin treatment during development extends lifespan and healthspan. *bioRxiv*. 2022:2022.02.18.481092. <https://doi.org/10.1101/2022.02.18.481092>
3. Blagosklonny MV. Revisiting the antagonistic pleiotropy theory of aging: TOR-driven program and quasi-program. *Cell Cycle*. 2010; 9:3151–56. <https://doi.org/10.4161/cc.9.16.13120> PMID:[20724817](https://pubmed.ncbi.nlm.nih.gov/20724817/)
4. Blagosklonny MV. Aging is not programmed: genetic pseudo-program is a shadow of developmental growth. *Cell Cycle*. 2013; 12:3736–42. <https://doi.org/10.4161/cc.27188> PMID:[24240128](https://pubmed.ncbi.nlm.nih.gov/24240128/)
5. Blagosklonny MV. Answering the ultimate question “what is the proximal cause of aging?”. *Aging (Albany NY)*. 2012; 4:861–77. <https://doi.org/10.18632/aging.100525> PMID:[23425777](https://pubmed.ncbi.nlm.nih.gov/23425777/)
6. Wullschlegel S, Loewith R, Hall MN. TOR signaling in growth and metabolism. *Cell*. 2006; 124:471–84. <https://doi.org/10.1016/j.cell.2006.01.016> PMID:[16469695](https://pubmed.ncbi.nlm.nih.gov/16469695/)



7. Saxton RA, Sabatini DM. mTOR Signaling in Growth, Metabolism, and Disease. *Cell*. 2017; 168:960–76. <https://doi.org/10.1016/j.cell.2017.02.004> PMID:28283069
8. Kim J, Guan KL. mTOR as a central hub of nutrient signalling and cell growth. *Nat Cell Biol*. 2019; 21:63–71. <https://doi.org/10.1038/s41556-018-0205-1> PMID:30602761
9. Demidenko ZN, Blagosklonny MV. Growth stimulation leads to cellular senescence when the cell cycle is blocked. *Cell Cycle*. 2008; 7:3355–61. <https://doi.org/10.4161/cc.7.21.6919> PMID:18948731
10. Demidenko ZN, Zubova SG, Bukreeva EI, Pospelov VA, Pospelova TV, Blagosklonny MV. Rapamycin decelerates cellular senescence. *Cell Cycle*. 2009; 8:1888–95. <https://doi.org/10.4161/cc.8.12.8606> PMID:19471117
11. Gems D. The aging-disease false dichotomy: understanding senescence as pathology. *Front Genet*. 2015; 6:212. <https://doi.org/10.3389/fgene.2015.00212> PMID:26136770
12. de la Guardia Y, Gilliat AF, Hellberg J, Rennert P, Cabreiro F, Gems D. Run-on of germline apoptosis promotes gonad senescence in *C. elegans*. *Oncotarget*. 2016; 7:39082–96. <https://doi.org/10.18632/oncotarget.9681> PMID:27256978
13. Ezcurra M, Benedetto A, Sornda T, Gilliat AF, Au C, Zhang Q, et al. *C. elegans* Eats Its Own Intestine to Make Yolk Leading to Multiple Senescent Pathologies. *Curr Biol*. 2018; 28:2544–2556.e5. <https://doi.org/10.1016/j.cub.2018.06.035> PMID:30100339
14. Wang H, Zhang Z, Gems D. Monsters in the uterus: teratoma-like tumors in senescent *C. elegans* result from a parthenogenetic quasi-program. *Aging (Albany NY)*. 2018; 10:1188–89. <https://doi.org/10.18632/aging.101486> PMID:29923830
15. Wang H, Zhao Y, Ezcurra M, Benedetto A, Gilliat AF, Hellberg J, et al. A parthenogenetic quasi-program causes teratoma-like tumors during aging in wild-type *C. elegans*. *NPJ Aging Mech Dis*. 2018; 4:6. <https://doi.org/10.1038/s41514-018-0025-3> PMID:29928508
16. Blagosklonny MV. Rapamycin and quasi-programmed aging: four years later. *Cell Cycle*. 2010; 9:1859–62. <https://doi.org/10.4161/cc.9.10.11872> PMID:20436272
17. Blagosklonny MV. The hyperfunction theory of aging: three common misconceptions. *Oncoscience*. 2021; 8:103–07. <https://doi.org/10.18632/oncoscience.545> PMID:34549076
18. Gems D, de la Guardia Y. Alternative Perspectives on Aging in *Caenorhabditis elegans*: Reactive Oxygen Species or Hyperfunction? *Antioxid Redox Signal*. 2013; 19:321–29. <https://doi.org/10.1089/ars.2012.4840> PMID:22870907
19. Gems D, Partridge L. Genetics of longevity in model organisms: debates and paradigm shifts. *Annu Rev Physiol*. 2013; 75:621–44. <https://doi.org/10.1146/annurev-physiol-030212-183712> PMID:23190075
20. Gems D. The hyperfunction theory: an emerging paradigm for the biology of aging. *Ageing Res Rev*. 2022; 74:101557. <https://doi.org/10.1016/j.arr.2021.101557> PMID:34990845
21. Zimniak P. What is the Proximal Cause of Aging? *Front Genet*. 2012; 3:189. <https://doi.org/10.3389/fgene.2012.00189> PMID:23056007
22. Gladyshev VN. Aging: progressive decline in fitness due to the rising deleteriome adjusted by genetic, environmental, and stochastic processes. *Aging Cell*. 2016; 15:594–602. <https://doi.org/10.1111/ace.12480> PMID:27060562
23. de Grey AD. Programs, Hyperfunction, and Damage: Why Definitions and Logic Matter So Much in Biogerontology. *Rejuvenation Res*. 2021; 24:83–85. <https://doi.org/10.1089/rej.2021.0015> PMID:33784821
24. Blagosklonny MV. Response to the Thought-Provoking Critique of Hyperfunction Theory by Aubrey de Grey. *Rejuvenation Res*. 2021; 24:170–72. <https://doi.org/10.1089/rej.2021.0018> PMID:33784825
25. Blagosklonny MV. Prospective treatment of age-related diseases by slowing down aging. *Am J Pathol*. 2012; 181:1142–46. <https://doi.org/10.1016/j.ajpath.2012.06.024> PMID:22841821
26. Kaeblerlein M. Longevity and aging. *F1000Prime Rep*. 2013; 5:5. <https://doi.org/10.12703/P5-5> PMID:23513177
27. Chen C, Liu Y, Liu Y, Zheng P. mTOR regulation and therapeutic rejuvenation of aging hematopoietic stem cells. *Sci Signal*. 2009; 2:ra75.

<https://doi.org/10.1126/scisignal.2000559>

PMID:19934433

28. Harrison DE, Strong R, Sharp ZD, Nelson JF, Astle CM, Flurkey K, et al. Rapamycin fed late in life extends lifespan in genetically heterogeneous mice. *Nature*. 2009; 460:392–95.  
<https://doi.org/10.1038/nature08221>  
PMID:19587680
29. Anisimov VN, Zabezhinski MA, Popovich IG, Piskunova TS, Semenchenko AV, Tyndyk ML, et al. Rapamycin extends maximal lifespan in cancer-prone mice. *Am J Pathol*. 2010; 176:2092–97.  
<https://doi.org/10.2353/ajpath.2010.091050>  
PMID:20363920
30. Anisimov VN, Zabezhinski MA, Popovich IG, Piskunova TS, Semenchenko AV, Tyndyk ML, Y, et al. Rapamycin increases lifespan and inhibits spontaneous tumorigenesis in inbred female mice. *Cell Cycle*. 2011; 10:4230–36.  
<https://doi.org/10.4161/cc.10.24.18486>  
PMID:22107964
31. Miller RA, Harrison DE, Astle CM, Baur JA, Boyd AR, de Cabo R, et al. Rapamycin, but not resveratrol or simvastatin, extends life span of genetically heterogeneous mice. *J Gerontol A Biol Sci Med Sci*. 2011; 66:191–201.  
<https://doi.org/10.1093/gerona/gliq178>  
PMID:20974732
32. Komarova EA, Antoch MP, Novototskaya LR, Chernova OB, Paszkiewicz G, Leontieva OV, Blagosklonny MV, Gudkov AV. Rapamycin extends lifespan and delays tumorigenesis in heterozygous p53+/- mice. *Aging (Albany NY)*. 2012; 4:709–14.  
<https://doi.org/10.18632/aging.100498>  
PMID:23123616
33. Miller RA, Harrison DE, Astle CM, Fernandez E, Flurkey K, Han M, et al. Rapamycin-mediated lifespan increase in mice is dose and sex dependent and metabolically distinct from dietary restriction. *Aging Cell*. 2014; 13:468–77.  
<https://doi.org/10.1111/accel.12194>  
PMID:24341993
34. Zhang Y, Bokov A, Gelfond J, Soto V, Ikeno Y, Hubbard G, et al. Rapamycin extends life and health in C57BL/6 mice. *J Gerontol A Biol Sci Med Sci*. 2014; 69:119–30.  
<https://doi.org/10.1093/gerona/glt056>  
PMID:23682161
35. Johnson SC, Yanos ME, Bitto A, Castanza A, Gagnidze A, Gonzalez B, et al. Dose-dependent effects of mTOR inhibition on weight and mitochondrial disease in mice. *Front Genet*. 2015; 6:247.  
<https://doi.org/10.3389/fgene.2015.00247>  
PMID:26257774
36. Bitto A, Ito TK, Pineda VV, LeTexier NJ, Huang HZ, Sutlief E, et al. Transient rapamycin treatment can increase lifespan and healthspan in middle-aged mice. *eLife*. 2016; 5:5.  
<https://doi.org/10.7554/eLife.16351> PMID:27549339
37. Khapre RV, Kondratova AA, Patel S, Dubrovsky Y, Wrobel M, Antoch MP, et al. BMAL1-dependent regulation of the mTOR signaling pathway delays aging. *Aging (Albany NY)*. 2014; 6:48–57.  
<https://doi.org/10.18632/aging.100633>  
PMID:24481314
38. Arriola Apelo SI, Pumper CP, Baar EL, Cummings NE, Lammig DW. Intermittent Administration of Rapamycin Extends the Life Span of Female C57BL/6J Mice. *J Gerontol A Biol Sci Med Sci*. 2016; 71:876–81.  
<https://doi.org/10.1093/gerona/glw064>  
PMID:27091134
39. Strong R, Miller RA, Bogue M, Fernandez E, Javors MA, Libert S, et al. Rapamycin-mediated mouse lifespan extension: late-life dosage regimes with sex-specific effects. *Aging Cell*. 2020; 19:e13269.  
<https://doi.org/10.1111/accel.13269> PMID:33145977
40. Blagosklonny MV. Big mice die young but large animals live longer. *Aging (Albany NY)*. 2013; 5:227–33.  
<https://doi.org/10.18632/aging.100551>  
PMID:23603822
41. Leontieva OV, Paszkiewicz GM, Blagosklonny MV. Mechanistic or mammalian target of rapamycin (mTOR) may determine robustness in young male mice at the cost of accelerated aging. *Aging (Albany NY)*. 2012; 4:899–916.  
<https://doi.org/10.18632/aging.100528>  
PMID:23443503
42. Hebert M, Licursi M, Jensen B, Baker A, Milway S, Malsbury C, et al. Single rapamycin administration induces prolonged downward shift in defended body weight in rats. *PLoS One*. 2014; 9:e93691.  
<https://doi.org/10.1371/journal.pone.0093691>  
PMID:24787262
43. Leontieva OV, Paszkiewicz GM, Blagosklonny MV. Comparison of rapamycin schedules in mice on high-fat diet. *Cell Cycle*. 2014; 13:3350–56.  
<https://doi.org/10.4161/15384101.2014.970491>  
PMID:25485580
44. Leontieva OV, Paszkiewicz GM, Blagosklonny MV. Weekly administration of rapamycin improves survival and biomarkers in obese male mice on high-fat diet. *Aging Cell*. 2014; 13:616–22.  
<https://doi.org/10.1111/accel.12211> PMID:24655348

45. Anderl S, Freeland M, Kwiatkowski DJ, Goto J. Therapeutic value of prenatal rapamycin treatment in a mouse brain model of tuberous sclerosis complex. *Hum Mol Genet*. 2011; 20:4597–604.  
<https://doi.org/10.1093/hmg/ddr393>  
PMID:[21890496](https://pubmed.ncbi.nlm.nih.gov/21890496/)
46. Urbano-Gómez JD, Casañas JJ, Benito I, Montesinos ML. Prenatal treatment with rapamycin restores enhanced hippocampal mGluR-LTD and mushroom spine size in a Down's syndrome mouse model. *Mol Brain*. 2021; 14:84. <https://doi.org/10.1186/s13041-021-00795-6> PMID:[34034796](https://pubmed.ncbi.nlm.nih.gov/34034796/)
47. Hennig M, Fiedler S, Jux C, Thierfelder L, Drenckhahn JD. Prenatal Mechanistic Target of Rapamycin Complex 1 (m TORC1) Inhibition by Rapamycin Treatment of Pregnant Mice Causes Intrauterine Growth Restriction and Alters Postnatal Cardiac Growth, Morphology, and Function. *J Am Heart Assoc*. 2017; 6:e005506.  
<https://doi.org/10.1161/JAHA.117.005506>  
PMID:[28778941](https://pubmed.ncbi.nlm.nih.gov/28778941/)
48. Blagosklonny MV. Rapamycin for longevity: opinion article. *Aging (Albany NY)*. 2019; 11:8048–67.  
<https://doi.org/10.18632/aging.102355>  
PMID:[31586989](https://pubmed.ncbi.nlm.nih.gov/31586989/)
49. Johnson SC, Kaeberlein M. Rapamycin in aging and disease: maximizing efficacy while minimizing side effects. *Oncotarget*. 2016; 7:44876–78.  
<https://doi.org/10.18632/oncotarget.10381>  
PMID:[27384492](https://pubmed.ncbi.nlm.nih.gov/27384492/)

# DNA- and telomere-damage does not limit lifespan: evidence from rapamycin

Mikhail V. Blagosklonny<sup>1</sup>

<sup>1</sup>Roswell Park Cancer Institute, Buffalo, NY 14263, USA

**Correspondence to:** Mikhail V. Blagosklonny; **email:** [Blagosklonny@oncotarget.com](mailto:Blagosklonny@oncotarget.com)

**Keywords:** quasi-programmed aging, hyperfunction theory, antagonistic pleiotropy, natural selection, mTOR

**Received:** January 29, 2021

**Accepted:** February 10, 2021

**Published:** February 12, 2021

**Copyright:** © 2021 Blagosklonny. This is an open access article distributed under the terms of the [Creative Commons Attribution License](https://creativecommons.org/licenses/by/3.0/) (CC BY 3.0), which permits unrestricted use, distribution, and reproduction in any medium, provided the original author and source are credited.

## ABSTRACT

**Failure of rapamycin to extend lifespan in DNA repair mutant and telomerase-knockout mice, while extending lifespan in normal mice, indicates that neither DNA damage nor telomere shortening limits normal lifespan or causes normal aging.**

## INTRODUCTION

As a provocative title has recently announced, “rapamycin fails to extend lifespan in DNA repair-deficient mice” [1]. The word “fails” implies bad news. Rapamycin tried but failed. Yet, it is expected that the anti-aging drug rapamycin should not restore lifespan of short-lived mice that fail to grow and die young from causes other than normal aging [2]. In such growth-retarded mice, rapamycin, an inhibitor of cell growth, further retards weight gain.

Similarly, rapamycin does not extend but even slightly shortens lifespan in telomerase-deficient mice, which die young from poor growth and intestinal atrophy caused by telomere shortening [3]. (As we will discuss, this is predictable by hyperfunction theory.) While shortening lifespan by 18% in unnatural telomerase-deficient mice, in the same study in natural mice, rapamycin increased lifespan by 39% and healthspan by 58% (measured as tumor-free survival) [3]. In dozens of independent studies, rapamycin has not failed to extend lifespan in normal mice [4]. However, while extending lifespan in normal mice, rapamycin may fail to save animals dying young from cellular growth retardation. But something important should not be overlooked. The failure of rapamycin to extend lifespan in these short-lived mice, dying from DNA damage, rules out the damage theory of aging. To understand this point, we must first discuss what limits animal lifespan.

## Quasi-programmed (hyperfunctional) aging

In proliferating cells, growth-promoting pathways such as mTOR (Target of Rapamycin) and MAPK drive cellular growth, which is balanced by cell division. When the cell cycle is arrested, however, growth-promoting pathways drive cellular senescence, which is a continuation of cellular growth in the absence of cell division [5]. During geroconversion to senescence, cells become hypertrophic and hyperfunctional. One example of hyper-function is SASP or Senescence-Associated Secretory Phenotype [6]. Rapamycin can cause reversible cycle arrest but suppresses geroconversion, thus ensuring quiescence instead of senescence. (Note: Rapamycin does not prevent cell cycle arrest, it only prevents geroconversion that makes this arrest permanent [7]. This point is often misquoted by others). Rapamycin slows down both growth and geroconversion, figuratively slowing down time [8]. Like cellular senescence is a continuation of growth, organismal aging is a continuation of growth too [9].

According to hyperfunction theory, aging is quasi-programmed, a continuation of developmental growth programs, driven in part by hyper-functional signaling pathways including the mTOR pathway [9]. Hyperfunction is an excessive normal function later in life. It's not necessarily an increase of function; it may even be insufficient decrease of function. For example, protein synthesis is decreased in *C. elegans* but

is still too high: its further inhibition extends lifespan [10, 11].

Hyperfunction leads to age-related diseases, secondary organ damage and loss of function. For example, cellular hyperfunctions result in hypertension, culminating in stroke and damage of the brain. Aging is a sum of all age-related diseases [12, 13]. This theory was discussed in detail [9, 14–20] and has gained experimental support [11, 16, 21–26]. I will not discuss it here, just to mention that accumulation of molecular damage is not a driving force of development and therefore of aging. It is hyperfunctional signaling pathways such as mTOR (one of many) that drive both growth and aging, causing age-related diseases that in turn damage organs, leading to secondary loss of function.

Although molecular damage accumulates, this accumulation is not life-limiting because quasi-programmed aging terminates life first (Figure 1A). Quasi-programmed (hyperfunctional) aging is life-limiting, because it is favored by natural selection.

Natural selection favors robust development and fitness early in life at the cost of aging. For example, growth hormone receptor-deficient mice (GHR-KO mice), with decreased mTORC1 activity, live longer but are small and weak early in life [27, 28]. In such mice mTORC1-driven aging is inhibited and mice live longer but would not survive in the wild and therefore do not exist in nature. As another example, knockout of PI3K, an activator of mTOR pathways, extends lifespan 10-fold in *C. elegans* [29]. The mutant worm undergoes prolonged developmental arrest, which would be lethal in the wild [29]. Therefore, natural selection favors hyperfunctional mTOR that is optimal for development but drives age-related diseases later in life.

According to damage theories, aging is functional decline caused by molecular damage. According to hyperfunction theory, quasi-programmed aging is not functional decline but a hyperfunction: cellular and systemic functions are higher than optimal for longevity. They are optimal for early life fitness and in part (only in part) mTOR-dependent.

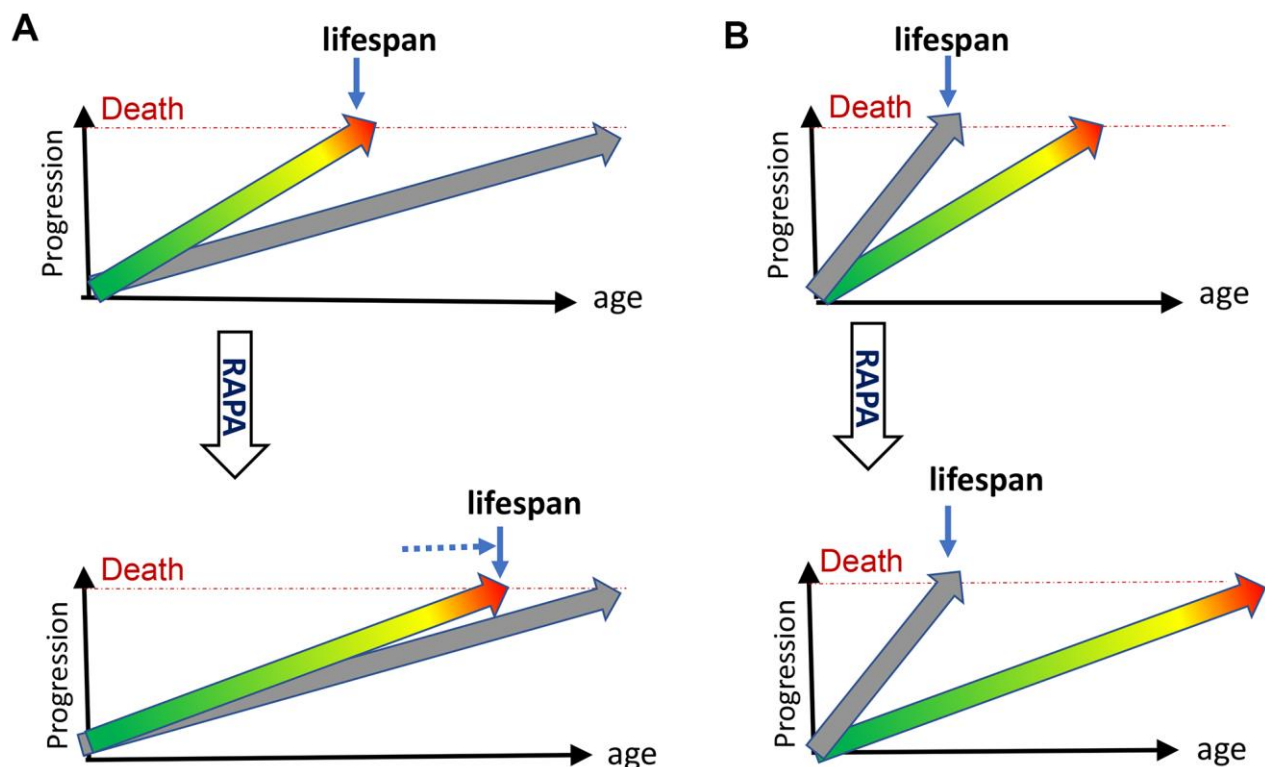

**Figure 1. Rapamycin extends lifespan in natural but not progeroid mice.** (A) Natural mice. Hyperfunctional aging (green/yellow/red arrow) progresses from development (green) to diseases (red), reaching death threshold and limiting lifespan. Accumulation of molecular damage (gray arrow) is slow and does not reach death threshold in animal lifetime. It would take longer to die from molecular damage. Treatment with rapamycin (RAPA) extends lifespan by slowing down mTOR-driven aging (B) Progeroid, telomerase- or DNA-repair-deficient mice. Accumulation of molecular damage (gray arrow) is artificially accelerated to become life-limiting. Treatment with rapamycin (RAPA) cannot extend lifespan.



In both molecular damage and hyperfunction theories, aging exists because late-life is shadowed from natural selection. But quasi-programmed aging is not simply shadowed from, it is promoted by natural selection, because accelerated aging is hardwired with fitness early in life. By selecting for fitness, nature indirectly selects for accelerated aging. This makes quasi-programmed aging life-limiting. One of predictions of hyperfunction theory is that rapamycin must extend lifespan in animals [9]. This prediction has been confirmed. In dozens of studies, rapamycin prolongs lifespan and healthspan in mice [3, 30–65]. Rapamycin extends lifespan in *C. elegans* [66] and *Drosophila* [67–69]. Furthermore, rapamycin even extends life of the simplest animal, *Hydra*, which is thought to be immortal. Depending on conditions, *Hydra* can be either immortal or undergo aging. Rapamycin slows aging, stem cell exhaustion and extends life span in *Hydra* [70].

mTOR-driven aging is only one component of quasi-programmed (hyperfunction) aging. In addition, MEK/MAPK, NF- $\kappa$ B, p63, HIF-1 and many other signaling pathways are involved, interacting with the mTOR pathway and forming networks. Rapamycin cannot affect all of them. In theory, mTOR-independent quasi-programmed aging can be life-limiting in some conditions and diseases. I suggest that long-lived GHR-KO mice with low mTORC1 activity undergo partially mTORC1-independent quasi-programmed senescence, because rapamycin cannot prolong lifespan in these mice further, while prolonging lifespan in parental normal mice [71]. Discussion of mTOR-independent components of quasi-programmed aging is beyond the focus of this article. Let us return to stochastic accumulation of molecular damage.

### How molecular damage can become life-limiting

Molecular damage can become life-limiting in two ways. First, hyper-functional aging should be eliminated or slowed down, so an organism lives long enough to die from accumulation of molecular damage. In this scenario, accumulation of molecular damage causes post-aging. Such examples are unknown, but it is a very intriguing possibility. Could a PI3K-null worm [29] with 10-fold longer lifespan die from molecular damage?

Second, accumulation of molecular damage can be greatly accelerated artificially by knockout of repair/maintenance enzymes (Figure 1B). Such animals do not exist in nature. But artificially created, they may provide a glimpse of how post-aging may look. Their pathology differs drastically from normal aging, for

example, telomere shortening. Second-generation telomerase-deficient mice (G2 *Terc*<sup>-/-</sup>) with critically short telomeres fail to grow and die young from unfamiliar diseases such as intestinal atrophy due to failure of cell proliferation [3]. When telomeres reach critical length, it can cause DNA-damage response, leading to aplastic anemia, organ fibrosis, atrophy of the small intestine and the spleen, skin and hair lesions. In humans, diseases of short telomeres cause death from bone marrow failure and pulmonary fibrosis [72]. This does not resemble normal aging.

In humans, mice and *C. elegans*, telomere shortening is not life-limiting [73–75]. In mice lacking telomerase, even accelerated telomere shortening is still not life-limiting in the first generation [76]. It took several generations to achieve critically short telomeres, leading to syndromes strikingly different from normal aging. In humans, telomere length does not reach telomere threshold during life time [75, 77, 78]. Normal telomere shortening would cause telomere-driven pathologies, but normal animals do not live long enough to reach this threshold. Rapamycin prolongs life in normal mice, proving that telomere length does not constrain normal lifespan [3]. When artificially shortened, then telomeres become life-limiting and rapamycin cannot extend lifespan anymore [3].

*Ercc1*<sup>Δ/-</sup> mutant mice are defective in DNA repair, such as transcription-coupled repair, global-genome nucleotide excision and crosslink repair [1, 2]. Therefore, multiple types of DNA damages accumulate. This leads to decreased cell proliferation, arrested development, poor growth, abnormal liver nuclei of liver and kidney, absence of subcutaneous fat, ferritin deposition, kidney malfunction and early death [2]. Unlike natural mice, short-lived *Ercc1*<sup>Δ/-</sup> mice do not develop tumors, probably because they do not live long enough to suffer typical age-related diseases [1, 2]. In such mice, dying from molecular damage, rapamycin fails to extend lifespan [1].

### CONCLUSIONS

Here I discussed new evidence that normal aging is not caused by accumulation of molecular damage or telomere shortening: while extending normal lifespan in mice, rapamycin failed to do so in mice dying from molecular damage (Figure 1).

Previously, several lines of evidence suggested that molecular damage does not cause normal aging. Their detailed discussion is beyond the focus of this article, so I will just mention some of them, without referencing them (I will reference these points in forthcoming review “When longevity drugs do not increase

longevity: Unifying development-driven and damage-induced theories of aging”, In press). First, overexpression of enzymes that decrease damage does not extend lifespan in most studies. Similarly, antioxidants do not extend lifespan in animals and may increase mortality in humans. Furthermore, even data that support damage theory can be explained by other mechanisms. For example, N-Acetyl-L-Cysteine, a commonly used antioxidant, can inhibit mTOR. Second, according to calculations, molecular damage, especially mtDNA mutations and telomere shortening, cannot reach deadly threshold during animal lifetime. Third, genetic knockout of signaling pathways can extend lifespan without affecting molecular damage. Similarly, pharmacological interventions can extend life without affecting damage accumulation. Fourth, dramatic intra- and inter-species differences in lifespan poorly correlate with the rate of molecular damage. Fifth, nuclear transfer and nuclear reprogramming both rule out DNA damage as a cause of aging. Following adult somatic cell nuclear transfer, cloned animals are healthy and have normal lifespan. Sixth, low levels of molecular damage may increase longevity. This phenomenon is known as hormesis. Regardless of mechanistic explanations, this indicates that molecular damage is not life-limiting even when moderately increased. Finally, rapamycin increases lifespan in all normal animals tested, indicating that mTORC1-dependent quasi-program is life-limiting. The list can go on and on. Once again, damage accumulates and must cause death eventually, but quasi-programmed (hyperfunctional) aging terminates life first. Molecular damage can become life-limiting, when artificially accelerated or, potentially, when quasi-programmed aging is decelerated. Then interventions to repair molecular damage may increase life further.

## CONFLICTS OF INTEREST

The author declares that he has no conflicts of interest.

## REFERENCES

1. Birkisdóttir MB, Jaarsma D, Brandt RM, Barnhoorn S, van Vliet N, Imholz S, van Oostrom CT, Nagarajah B, Portilla Fernández E, Roks AJ, Elgersma Y, van Steeg H, Ferreira JA, et al. Unlike dietary restriction, rapamycin fails to extend lifespan and reduce transcription stress in progeroid DNA repair-deficient mice. *Aging Cell*. 2021. [Epub ahead of print]. <https://doi.org/10.1111/accel.13302> PMID:33484480
2. Weeda G, Donker I, de Wit J, Morreau H, Janssens R, Vissers CJ, Nigg A, van Steeg H, Bootsma D, Hoeijmakers JH. Disruption of mouse ERCC1 results in a novel repair syndrome with growth failure, nuclear abnormalities and senescence. *Curr Biol*. 1997; 7:427–39. [https://doi.org/10.1016/S0960-9822\(06\)00190-4](https://doi.org/10.1016/S0960-9822(06)00190-4) PMID:9197240
3. Ferrara-Romeo I, Martinez P, Saraswati S, Whittemore K, Graña-Castro O, Thelma Poluha L, Serrano R, Hernandez-Encinas E, Blanco-Aparicio C, Maria Flores J, Blasco MA. The mTOR pathway is necessary for survival of mice with short telomeres. *Nat Commun*. 2020; 11:1168. <https://doi.org/10.1038/s41467-020-14962-1> PMID:32127537
4. Blagosklonny MV. The goal of geroscience is life extension. *Oncotarget*. 2021; 12:131–44 <https://doi.org/10.18632/oncotarget.27882>
5. Demidenko ZN, Blagosklonny MV. Growth stimulation leads to cellular senescence when the cell cycle is blocked. *Cell Cycle*. 2008; 7:3355–61. <https://doi.org/10.4161/cc.7.21.6919> PMID:18948731
6. Laberge RM, Sun Y, Orjalo AV, Patil CK, Freund A, Zhou L, Curran SC, Davalos AR, Wilson-Edell KA, Liu S, Limbad C, Demaria M, Li P, et al. MTOR regulates the pro-tumorigenic senescence-associated secretory phenotype by promoting IL1A translation. *Nat Cell Biol*. 2015; 17:1049–61. <https://doi.org/10.1038/ncb3195> PMID:26147250
7. Blagosklonny MV. Cell cycle arrest is not yet senescence, which is not just cell cycle arrest: terminology for TOR-driven aging. *Aging (Albany NY)*. 2012; 4:159–65. <https://doi.org/10.18632/aging.100443> PMID:22394614
8. Blagosklonny MV. Does rapamycin slow down time? *Oncotarget*. 2018; 9:30210–12. <https://doi.org/10.18632/oncotarget.25788> PMID:30100983
9. Blagosklonny MV. Aging and immortality: quasi-programmed senescence and its pharmacologic inhibition. *Cell Cycle*. 2006; 5:2087–102. <https://doi.org/10.4161/cc.5.18.3288> PMID:17012837
10. Pan KZ, Palter JE, Rogers AN, Olsen A, Chen D, Lithgow GJ, Kapahi P. Inhibition of mRNA translation extends lifespan in *Caenorhabditis elegans*. *Aging Cell*. 2007; 6:111–19. <https://doi.org/10.1111/j.1474-9726.2006.00266.x> PMID:17266680
11. Dhondt I, Petyuk VA, Cai H, Vandemeulebroucke L, Vierstraete A, Smith RD, Depuydt G, Braeckman BP. FOXO/DAF-16 activation slows down turnover of the majority of proteins in *C. elegans*. *Cell Rep*. 2016; 16:3028–40. <https://doi.org/10.1016/j.celrep.2016.07.088>

PMID:[27626670](#)

12. Blagosklonny MV. Validation of anti-aging drugs by treating age-related diseases. *Aging* (Albany NY). 2009; 1:281–88.  
<https://doi.org/10.18632/aging.100034>  
PMID:[20157517](#)
13. Blagosklonny MV. Prospective treatment of age-related diseases by slowing down aging. *Am J Pathol*. 2012; 181:1142–46.  
<https://doi.org/10.1016/j.ajpath.2012.06.024>  
PMID:[22841821](#)
14. Blagosklonny MV. Aging: ROS or TOR. *Cell Cycle*. 2008; 7:3344–54.  
<https://doi.org/10.4161/cc.7.21.6965>  
PMID:[18971624](#)
15. Blagosklonny MV. Answering the ultimate question “what is the proximal cause of aging?”. *Aging* (Albany NY). 2012; 4:861–77.  
<https://doi.org/10.18632/aging.100525>  
PMID:[23425777](#)
16. Gems D, de la Guardia Y. Alternative perspectives on aging in *Caenorhabditis elegans*: reactive oxygen species or hyperfunction? *Antioxid Redox Signal*. 2013; 19:321–29.  
<https://doi.org/10.1089/ars.2012.4840>  
PMID:[22870907](#)
17. Gems D, Partridge L. Genetics of longevity in model organisms: debates and paradigm shifts. *Annu Rev Physiol*. 2013; 75:621–44.  
<https://doi.org/10.1146/annurev-physiol-030212-183712> PMID:[23190075](#)
18. Wang H, Zhao Y, Ezcurra M, Benedetto A, Gilliat AF, Hellberg J, Ren Z, Galimov ER, Athigapanich T, Girstmair J, Telford MJ, Dolphin CT, Zhang Z, Gems D. A parthenogenetic quasi-program causes teratoma-like tumors during aging in wild-type *C. elegans*. *NPJ Aging Mech Dis*. 2018; 4:6.  
<https://doi.org/10.1038/s41514-018-0025-3>  
PMID:[29928508](#)
19. Ezcurra M, Benedetto A, Sornda T, Gilliat AF, Au C, Zhang Q, van Schelt S, Petrache AL, Wang H, de la Guardia Y, Bar-Nun S, Tyler E, Wakelam MJ, Gems D. *C. elegans* Eats Its Own Intestine to Make Yolk Leading to Multiple Senescent Pathologies. *Curr Biol*. 2018; 28:2544–56.e5.  
<https://doi.org/10.1016/j.cub.2018.06.035>  
PMID:[30100339](#)
20. Xi J, Cai J, Cheng Y, Fu Y, Wei W, Zhang Z, Zhuang Z, Hao Y, Lilly MA, Wei Y. The TORC1 inhibitor Nprl2 protects age-related digestive function in *Drosophila*. *Aging* (Albany NY). 2019; 11:9811–28.  
<https://doi.org/10.18632/aging.102428>

PMID:[31712450](#)

21. Scialò F, Sriram A, Naudí A, Ayala V, Jové M, Pamplona R, Sanz A. Target of rapamycin activation predicts lifespan in fruit flies. *Cell Cycle*. 2015; 14:2949–58.  
<https://doi.org/10.1080/15384101.2015.1071745>  
PMID:[26259964](#)
22. de la Guardia Y, Gilliat AF, Hellberg J, Rennert P, Cabreiro F, Gems D. Run-on of germline apoptosis promotes gonad senescence in *C. elegans*. *Oncotarget*. 2016; 7:39082–96.  
<https://doi.org/10.18632/oncotarget.9681>  
PMID:[27256978](#)
23. Chen HY, Maklakov AA. The worm that lived: evolution of rapid aging under high extrinsic mortality revisited. *Worm*. 2013; 2:e23704.  
<https://doi.org/10.4161/worm.23704> PMID:[24778930](#)
24. Lind MI, Ravindran S, Sekajova Z, Carlsson H, Hinas A, Maklakov AA. Experimentally reduced insulin/IGF-1 signaling in adulthood extends lifespan of parents and improves darwinian fitness of their offspring. *Evol Lett*. 2019; 3:207–16.  
<https://doi.org/10.1002/evl3.108> PMID:[31007945](#)
25. Cheng Z, Ristow M. Mitochondria and metabolic homeostasis. *Antioxid Redox Signal*. 2013; 19:240–42.  
<https://doi.org/10.1089/ars.2013.5255>  
PMID:[23432475](#)
26. de Verges J, Nehring V. A critical look at proximate causes of social insect senescence: damage accumulation or hyperfunction? *Curr Opin Insect Sci*. 2016; 16:69–75.  
<https://doi.org/10.1016/j.cois.2016.05.003>  
PMID:[27720053](#)
27. Dominick G, Berryman DE, List EO, Kopchick JJ, Li X, Miller RA, Garcia GG. Regulation of mTOR activity in snell dwarf and GH receptor gene-disrupted mice. *Endocrinology*. 2015; 156:565–75.  
<https://doi.org/10.1210/en.2014-1690>  
PMID:[25456069](#)
28. Bartke A, Sun LY, Longo V. Somatotrophic signaling: trade-offs between growth, reproductive development, and longevity. *Physiol Rev*. 2013; 93:571–98.  
<https://doi.org/10.1152/physrev.00006.2012>  
PMID:[23589828](#)
29. Ayyadevara S, Alla R, Thaden JJ, Shmookler Reis RJ. Remarkable longevity and stress resistance of nematode PI3K-null mutants. *Aging Cell*. 2008; 7:13–22.  
<https://doi.org/10.1111/j.1474-9726.2007.00348.x>  
PMID:[17996009](#)
30. Chen C, Liu Y, Liu Y, Zheng P. mTOR regulation and

therapeutic rejuvenation of aging hematopoietic stem cells. *Sci Signal*. 2009; 2:ra75.

<https://doi.org/10.1126/scisignal.2000559>

PMID:19934433

31. Harrison DE, Strong R, Sharp ZD, Nelson JF, Astle CM, Flurkey K, Nadon NL, Wilkinson JE, Frenkel K, Carter CS, Pahor M, Javors MA, Fernandez E, Miller RA. Rapamycin fed late in life extends lifespan in genetically heterogeneous mice. *Nature*. 2009; 460:392–95.  
<https://doi.org/10.1038/nature08221> PMID:19587680
32. Anisimov VN, Zabezhinski MA, Popovich IG, Piskunova TS, Semenchenko AV, Tyndyk ML, Yurova MN, Antoch MP, Blagosklonny MV. Rapamycin extends maximal lifespan in cancer-prone mice. *Am J Pathol*. 2010; 176:2092–97.  
<https://doi.org/10.2353/ajpath.2010.091050> PMID:20363920
33. Anisimov VN, Zabezhinski MA, Popovich IG, Piskunova TS, Semenchenko AV, Tyndyk ML, Yurova MN, Rosenfeld SV, Blagosklonny MV. Rapamycin increases lifespan and inhibits spontaneous tumorigenesis in inbred female mice. *Cell Cycle*. 2011; 10:4230–36.  
<https://doi.org/10.4161/cc.10.24.18486> PMID:22107964
34. Miller RA, Harrison DE, Astle CM, Baur JA, Boyd AR, de Cabo R, Fernandez E, Flurkey K, Javors MA, Nelson JF, Orihuela CJ, Pletcher S, Sharp ZD, et al. Rapamycin, but not resveratrol or simvastatin, extends life span of genetically heterogeneous mice. *J Gerontol A Biol Sci Med Sci*. 2011; 66:191–201.  
<https://doi.org/10.1093/gerona/glq178> PMID:20974732
35. Comas M, Toshkov I, Kuropatwinski KK, Chernova OB, Polinsky A, Blagosklonny MV, Gudkov AV, Antoch MP. New nanoformulation of rapamycin rapatar extends lifespan in homozygous p53<sup>-/-</sup> mice by delaying carcinogenesis. *Aging (Albany NY)*. 2012; 4:715–22.  
<https://doi.org/10.18632/aging.100496> PMID:23117593
36. Komarova EA, Antoch MP, Novototskaya LR, Chernova OB, Paszkiewicz G, Leontieva OV, Blagosklonny MV, Gudkov AV. Rapamycin extends lifespan and delays tumorigenesis in heterozygous p53<sup>+/-</sup> mice. *Aging (Albany NY)*. 2012; 4:709–14.  
<https://doi.org/10.18632/aging.100498> PMID:23123616
37. Ramos FJ, Chen SC, Garelick MG, Dai DF, Liao CY, Schreiber KH, MacKay VL, An EH, Strong R, Ladiges WC, Rabinovitch PS, Kaeberlein M, Kennedy BK. Rapamycin reverses elevated mTORC1 signaling in lamin A/C-deficient mice, rescues cardiac and skeletal muscle function, and extends survival. *Sci Transl Med*. 2012; 4:144ra103.  
<https://doi.org/10.1126/scitranslmed.3003802> PMID:22837538
38. Wilkinson JE, Burmeister L, Brooks SV, Chan CC, Friedline S, Harrison DE, Hejtmancik JF, Nadon N, Strong R, Wood LK, Woodward MA, Miller RA. Rapamycin slows aging in mice. *Aging Cell*. 2012; 11:675–82.  
<https://doi.org/10.1111/j.1474-9726.2012.00832.x> PMID:22587563
39. Fang Y, Westbrook R, Hill C, Boparai RK, Arum O, Spong A, Wang F, Javors MA, Chen J, Sun LY, Bartke A. Duration of rapamycin treatment has differential effects on metabolism in mice. *Cell Metab*. 2013; 17:456–62.  
<https://doi.org/10.1016/j.cmet.2013.02.008> PMID:23473038
40. Flynn JM, O’Leary MN, Zambataro CA, Academia EC, Presley MP, Garrett BJ, Zykovich A, Mooney SD, Strong R, Rosen CJ, Kapahi P, Nelson MD, Kennedy BK, Melov S. Late-life rapamycin treatment reverses age-related heart dysfunction. *Aging Cell*. 2013; 12:851–62.  
<https://doi.org/10.1111/accel.12109> PMID:23734717
41. Johnson SC, Yanos ME, Kayser EB, Quintana A, Sangesland M, Castanza A, Uhde L, Hui J, Wall VZ, Gagnidze A, Oh K, Wasko BM, Ramos FJ, et al. mTOR inhibition alleviates mitochondrial disease in a mouse model of leigh syndrome. *Science*. 2013; 342:1524–28.  
<https://doi.org/10.1126/science.1244360> PMID:24231806
42. Livi CB, Hardman RL, Christy BA, Dodds SG, Jones D, Williams C, Strong R, Bokov A, Javors MA, Ikeno Y, Hubbard G, Hasty P, Sharp ZD. Rapamycin extends life span of Rb1<sup>+/-</sup> mice by inhibiting neuroendocrine tumors. *Aging (Albany NY)*. 2013; 5:100–10.  
<https://doi.org/10.18632/aging.100533> PMID:23454836
43. Neff F, Flores-Dominguez D, Ryan DP, Horsch M, Schröder S, Adler T, Afonso LC, Aguilar-Pimentel JA, Becker L, Garrett L, Hans W, Hettich MM, Holtmeier R, et al. Rapamycin extends murine lifespan but has limited effects on aging. *J Clin Invest*. 2013; 123:3272–91.  
<https://doi.org/10.1172/JCI67674> PMID:23863708
44. Ye L, Widlund AL, Sims CA, Lamming DW, Guan Y, Davis JG, Sabatini DM, Harrison DE, Vang O, Baur JA. Rapamycin doses sufficient to extend lifespan do not compromise muscle mitochondrial content or endurance. *Aging (Albany NY)*. 2013; 5:539–50.  
<https://doi.org/10.18632/aging.100576> PMID:23929887



45. Fok WC, Chen Y, Bokov A, Zhang Y, Salmon AB, Diaz V, Javors M, Wood WH 3rd, Zhang Y, Becker KG, Pérez VI, Richardson A. Mice fed rapamycin have an increase in lifespan associated with major changes in the liver transcriptome. *PLoS One*. 2014; 9:e83988.  
<https://doi.org/10.1371/journal.pone.0083988>  
PMID:24409289
46. Hasty P, Livi CB, Dodds SG, Jones D, Strong R, Javors M, Fischer KE, Sloane L, Murthy K, Hubbard G, Sun L, Hurez V, Curiel TJ, Sharp ZD. eRapa restores a normal life span in a FAP mouse model. *Cancer Prev Res (Phila)*. 2014; 7:169–78.  
<https://doi.org/10.1158/1940-6207.CAPR-13-0299>  
PMID:24282255
47. Khapre RV, Kondratova AA, Patel S, Dubrovsky Y, Wrobel M, Antoch MP, Kondratov RV. BMAL1-dependent regulation of the mTOR signaling pathway delays aging. *Aging (Albany NY)*. 2014; 6:48–57.  
<https://doi.org/10.18632/aging.100633>  
PMID:24481314
48. Leontieva OV, Paszkiewicz GM, Blagosklonny MV. Weekly administration of rapamycin improves survival and biomarkers in obese male mice on high-fat diet. *Aging Cell*. 2014; 13:616–22.  
<https://doi.org/10.1111/accel.12211> PMID:24655348
49. Miller RA, Harrison DE, Astle CM, Fernandez E, Flurkey K, Han M, Javors MA, Li X, Nadon NL, Nelson JF, Pletcher S, Salmon AB, Sharp ZD, et al. Rapamycin-mediated lifespan increase in mice is dose and sex dependent and metabolically distinct from dietary restriction. *Aging Cell*. 2014; 13:468–77.  
<https://doi.org/10.1111/accel.12194> PMID:24341993
50. Popovich IG, Anisimov VN, Zabezhinski MA, Semenchenko AV, Tyndyk ML, Yurova MN, Blagosklonny MV. Lifespan extension and cancer prevention in HER-2/neu transgenic mice treated with low intermittent doses of rapamycin. *Cancer Biol Ther*. 2014; 15:586–92.  
<https://doi.org/10.4161/cbt.28164> PMID:24556924
51. Zhang Y, Bokov A, Gelfond J, Soto V, Ikeno Y, Hubbard G, Diaz V, Sloane L, Maslin K, Treaster S, Réndon S, van Remmen H, Ward W, et al. Rapamycin extends life and health in C57BL/6 mice. *J Gerontol A Biol Sci Med Sci*. 2014; 69:119–30.  
<https://doi.org/10.1093/gerona/glt056>  
PMID:23682161
52. Hurez V, Dao V, Liu A, Pandeswara S, Gelfond J, Sun L, Bergman M, Orihuela CJ, Galvan V, Padrón Á, Drerup J, Liu Y, Hasty P, et al. Chronic mTOR inhibition in mice with rapamycin alters T, B, myeloid, and innate lymphoid cells and gut flora and prolongs life of immune-deficient mice. *Aging Cell*. 2015; 14:945–56.  
<https://doi.org/10.1111/accel.12380> PMID:26315673
53. Johnson SC, Yanos ME, Bitto A, Castanza A, Gagnidze A, Gonzalez B, Gupta K, Hui J, Jarvie C, Johnson BM, Letexier N, McCanta L, Sangesland M, et al. Dose-dependent effects of mTOR inhibition on weight and mitochondrial disease in mice. *Front Genet*. 2015; 6:247.  
<https://doi.org/10.3389/fgene.2015.00247>  
PMID:26257774
54. Karunadharma PP, Basisty N, Dai DF, Chiao YA, Quarles EK, Hsieh EJ, Crispin D, Bielas JH, Ericson NG, Beyer RP, MacKay VL, MacCoss MJ, Rabinovitch PS. Subacute calorie restriction and rapamycin discordantly alter mouse liver proteome homeostasis and reverse aging effects. *Aging Cell*. 2015; 14:547–57.  
<https://doi.org/10.1111/accel.12317> PMID:25807975
55. Arriola Apelo SI, Pumper CP, Baar EL, Cummings NE, Lamming DW. Intermittent administration of rapamycin extends the life span of female C57BL/6J mice. *J Gerontol A Biol Sci Med Sci*. 2016; 71:876–81.  
<https://doi.org/10.1093/gerona/glw064>  
PMID:27091134
56. Bitto A, Ito TK, Pineda VV, LeTexier NJ, Huang HZ, Sutlief E, Tung H, Vizzini N, Chen B, Smith K, Meza D, Yajima M, Beyer RP, et al. Transient rapamycin treatment can increase lifespan and healthspan in middle-aged mice. *Elife*. 2016; 5:e16351.  
<https://doi.org/10.7554/eLife.16351> PMID:27549339
57. Liao CY, Anderson SS, Chicoine NH, Mayfield JR, Academia EC, Wilson JA, Pongkietisak C, Thompson MA, Lagmay EP, Miller DM, Hsu YM, McCormick MA, O'Leary MN, Kennedy BK. Rapamycin reverses metabolic deficits in lamin A/C-deficient mice. *Cell Rep*. 2016; 17:2542–52.  
<https://doi.org/10.1016/j.celrep.2016.10.040>  
PMID:27926859
58. Felici R, Buonvicino D, Muzzi M, Cavone L, Guasti D, Lapucci A, Pratesi S, De Cesaris F, Luceri F, Chiarugi A. Post onset, oral rapamycin treatment delays development of mitochondrial encephalopathy only at supramaximal doses. *Neuropharmacology*. 2017; 117:74–84.  
<https://doi.org/10.1016/j.neuropharm.2017.01.039>  
PMID:28161373
59. Siegmund SE, Yang H, Sharma R, Javors M, Skinner O, Mootha V, Hirano M, Schon EA. Low-dose rapamycin extends lifespan in a mouse model of mtDNA depletion syndrome. *Hum Mol Genet*. 2017; 26:4588–605.  
<https://doi.org/10.1093/hmg/ddx341> PMID:28973153
60. Wang T, Tsui B, Kreisberg JF, Robertson NA, Gross AM, Yu MK, Carter H, Brown-Borg HM, Adams PD, Ideker T. Epigenetic aging signatures in mice livers are slowed by dwarfism, calorie restriction and rapamycin treatment. *Genome Biol*. 2017; 18:57.



- <https://doi.org/10.1186/s13059-017-1186-2>  
PMID:28351423
61. Bielas J, Herbst A, Widjaja K, Hui J, Aiken JM, McKenzie D, Miller RA, Brooks SV, Wanagat J. Long term rapamycin treatment improves mitochondrial DNA quality in aging mice. *Exp Gerontol*. 2018; 106:125–31.  
<https://doi.org/10.1016/j.exger.2018.02.021>  
PMID:29486228
  62. Weiss R, Fernandez E, Liu Y, Strong R, Salmon AB. Metformin reduces glucose intolerance caused by rapamycin treatment in genetically heterogeneous female mice. *Aging (Albany NY)*. 2018; 10:386–401.  
<https://doi.org/10.18632/aging.101401>  
PMID:29579736
  63. Parihar M, Dodds SG, Hubbard G, Javors MA, Strong R, Hasty P, Sharp ZD. Rapamycin extends life span in *Apc<sup>Min/+</sup>* colon cancer FAP model. *Clin Colorectal Cancer*. 2020; S1533-0028:30123–27.  
<https://doi.org/10.1016/j.clcc.2020.08.006>  
PMID:33132009
  64. Strong R, Miller RA, Bogue M, Fernandez E, Javors MA, Libert S, Martinez PA, Murphy MP, Musi N, Nelson JF, Petrascheck M, Reifsnnyder P, Richardson A, et al. Rapamycin-mediated mouse lifespan extension: late-life dosage regimes with sex-specific effects. *Aging Cell*. 2020; 19:e13269.  
<https://doi.org/10.1111/acer.13269>  
PMID:33145977
  65. Christy B, Demaria M, Campisi J, Huang J, Jones D, Dodds SG, Williams C, Hubbard G, Livi CB, Gao X, Weintraub S, Curiel T, Sharp ZD, Hasty P. P53 and rapamycin are additive. *Oncotarget*. 2015; 6:15802–13.  
<https://doi.org/10.18632/oncotarget.4602>  
PMID:26158292
  66. Robida-Stubbs S, Glover-Cutter K, Lamming DW, Mizunuma M, Narasimhan SD, Neumann-Haefelin E, Sabatini DM, Blackwell TK. TOR signaling and rapamycin influence longevity by regulating SKN-1/Nrf and DAF-16/FoxO. *Cell Metab*. 2012; 15:713–24.  
<https://doi.org/10.1016/j.cmet.2012.04.007>  
PMID:22560223
  67. Bjedov I, Toivonen JM, Kerr F, Slack C, Jacobson J, Foley A, Partridge L. Mechanisms of life span extension by rapamycin in the fruit fly *drosophila melanogaster*. *Cell Metab*. 2010; 11:35–46.  
<https://doi.org/10.1016/j.cmet.2009.11.010>  
PMID:20074526
  68. Wang A, Mouser J, Pitt J, Promislow D, Kaerberlein M. Rapamycin enhances survival in a *drosophila* model of mitochondrial disease. *Oncotarget*. 2016; 7:80131–39.  
<https://doi.org/10.18632/oncotarget.12560>  
PMID:27741510
  69. Castillo-Quan JI, Tain LS, Kinghorn KJ, Li L, Grönke S, Hinze Y, Blackwell TK, Bjedov I, Partridge L. A triple drug combination targeting components of the nutrient-sensing network maximizes longevity. *Proc Natl Acad Sci USA*. 2019; 116:20817–19.  
<https://doi.org/10.1073/pnas.1913212116>  
PMID:31570569
  70. Tomczyk S, Suknovic N, Schenkelaars Q, Wenger Y, Ekundayo K, Buzgariu W, Bauer C, Fischer K, Austad S, Galliot B. Deficient autophagy in epithelial stem cells drives aging in the freshwater cnidarian *Hydra*. *Development*. 2020; 147:dev177840.  
<https://doi.org/10.1242/dev.177840> PMID:31862842
  71. Fang Y, Hill CM, Darcy J, Reyes-Ordoñez A, Arauz E, McFadden S, Zhang C, Osland J, Gao J, Zhang T, Frank SJ, Javors MA, Yuan R, et al. Effects of rapamycin on growth hormone receptor knockout mice. *Proc Natl Acad Sci USA*. 2018; 115:E1495–503.  
<https://doi.org/10.1073/pnas.1717065115>  
PMID:29378959
  72. Gramatges MM, Bertuch AA. Short telomeres: from dyskeratosis congenita to sporadic aplastic anemia and Malignancy. *Transl Res*. 2013; 162:353–63.  
<https://doi.org/10.1016/j.trsl.2013.05.003>  
PMID:23732052
  73. Raices M, Maruyama H, Dillin A, Karlseder J. Uncoupling of longevity and telomere length in *C. Elegans*. *PLoS Genet*. 2005; 1:e30.  
<https://doi.org/10.1371/journal.pgen.0010030>  
PMID:16151516
  74. Simons MJ. Questioning causal involvement of telomeres in aging. *Ageing Res Rev*. 2015; 24:191–96.  
<https://doi.org/10.1016/j.arr.2015.08.002>  
PMID:26304838
  75. Steenstrup T, Kark JD, Verhulst S, Thinggaard M, Hjelmborg JV, Dalgård C, Kyvik KO, Christiansen L, Mangino M, Spector TD, Petersen I, Kimura M, Benetos A, et al. Telomeres and the natural lifespan limit in humans. *Aging (Albany NY)*. 2017; 9:1130–42.  
<https://doi.org/10.18632/aging.101216>  
PMID:28394764
  76. Herrera E, Samper E, Martín-Caballero J, Flores JM, Lee HW, Blasco MA. Disease states associated with telomerase deficiency appear earlier in mice with short telomeres. *EMBO J*. 1999; 18:2950–60.  
<https://doi.org/10.1093/emboj/18.11.2950>  
PMID:10357808
  77. Bischoff C, Petersen HC, Graakjaer J, Andersen-Ranberg K, Vaupel JW, Bohr VA, Kølvrå S, Christensen K. No association between telomere length and survival among the elderly and oldest old. *Epidemiology*. 2006; 17:190–94.

<https://doi.org/10.1097/01.ede.0000199436.55248.10>  
PMID:[16477260](https://pubmed.ncbi.nlm.nih.gov/16477260/)

78. Martin-Ruiz CM, Gussekloo J, van Heemst D, von Zglinicki T, Westendorp RG. Telomere length in white blood cells is not associated with morbidity or

mortality in the oldest old: a population-based study. *Aging Cell*. 2005; 4:287–90.

<https://doi.org/10.1111/j.1474-9726.2005.00171.x>  
PMID:[16300480](https://pubmed.ncbi.nlm.nih.gov/16300480/)

# From causes of aging to death from COVID-19

Mikhail V. Blagosklonny<sup>1</sup>

<sup>1</sup>Roswell Park Cancer Institute, Buffalo, NY 14263, USA

**Correspondence to:** Mikhail V. Blagosklonny; email: [Blagosklonny@oncotarget.com](mailto:Blagosklonny@oncotarget.com) or [Blagosklonny@rapalogs.com](mailto:Blagosklonny@rapalogs.com)

**Keywords:** aging, mTOR, rapalogs, senolytics, SARS-CoV-2, COVID-19, coronavirus

**Received:** April 30, 2020

**Accepted:** June 8, 2020

**Published:** June 12, 2020

**Copyright:** Blagosklonny et al. This is an open-access article distributed under the terms of the Creative Commons Attribution License (CC BY 3.0), which permits unrestricted use, distribution, and reproduction in any medium, provided the original author and source are credited.

## ABSTRACT

COVID-19 is not deadly early in life, but mortality increases exponentially with age, which is the strongest predictor of mortality. Mortality is higher in men than in women, because men age faster, and it is especially high in patients with age-related diseases, such as diabetes and hypertension, because these diseases are manifestations of aging and a measure of biological age. At its deepest level, aging (a program-like continuation of developmental growth) is driven by inappropriately high cellular functioning. The hyperfunction theory of quasi-programmed aging explains why COVID-19 vulnerability (lethality) is an age-dependent syndrome, linking it to other age-related diseases. It also explains inflammaging and immunosenescence, hyperinflammation, hyperthrombosis, and cytokine storms, all of which are associated with COVID-19 vulnerability. Anti-aging interventions, such as rapamycin, may slow aging and age-related diseases, potentially decreasing COVID-19 vulnerability.

## COVID-19 vulnerability: age, diseases, gender

COVID-19 is caused by coronavirus SARS-CoV-2. Most cases of COVID-19 are asymptomatic, but some are severe and lethal. Mortality is the simplest marker of COVID-19 vulnerability. COVID-19 vulnerability can be defined as a chance of death from COVID-19, once infected.

### Age:

In all studies conducted in all countries, the mortality rate from COVID-19 increases exponentially with age [1–11]. Exact mortality rates varied in hundreds of studies because they depend on testing and therapeutic interventions. But the rule is clear: the mortality rate is increasing exponentially with age.

### Age-related diseases:

Mortality is especially high in patients with pre-existing conditions [6, 9, 10, 12–23].

In Italy, 99% of patients, who died, had at least one illness.

<https://www.bloomberg.com/news/articles/2020-03-18/99-of-those-who-died-from-virus-had-other-illness-italy-says>.

In other words, infected people without pre-existing diseases do not die. This may seem paradoxical because we just discussed that age is sufficient to increase mortality exponentially. This is because pre-existing conditions are manifestations of biological age, whereas aging and diseases are two sides of the same coin [24–26]. These conditions are typical age-related diseases: hypertension, diabetes, obesity, ischemic heart disease (IHD) and chronic obstructive pulmonary disease (COPD) and other diseases [9, 12–23].

Of course, not all (only some) patients with age-related diseases die from COVID-19. In other words, age-related diseases are necessary but not sufficient for mortality from COVID-19.

Age and pre-existing (age-related) diseases are interdependent. A number and severity of diseases correlate with age. An average 60 year old person has

more age-related diseases than an average 50 year old person. Yet, a particular 60 year old person may have no age-related diseases, whereas a particular 50 year old person may have multiple diseases including hypertension, diabetes, obesity and cancer. In this case, it is a chronologically younger person who is biologically older. And it is the biological age that determines the likelihood of death from COVID-19.

### **Male Gender:**

At the same age, the mortality rate is twice higher in men than in women [9, 27, 28], in part, because men age faster than women and, at any chronological age, men are biologically older than women [29].

So, three rules can be combined in one: COVID-19 vulnerability is determined by biological age. Biological age combines chronological age, age-related diseases and gender. A combination of all age-related diseases (and pre-diseases) is a biomarker of biological age. Figuratively, SARS-Cov-2 can “measure” biological age, which is thus the best predictor of mortality from both COVID-19 and other diseases.

### **Mortality from aging compared with COVID-19 mortality**

Aging can be measured as an increase in the probability of death with age. Mortality increases exponentially, starting from age 8-9. Men have a higher “normal” age-related death rate than women because men age faster than women [29].

COVID-19 mortality rate parallels the “expected” aging-related death rate (Supplementary Figure 1) and see second graph in:

<https://medium.com/wintoncentre/how-much-normal-risk-does-covid-represent-4539118e1196>.

Chances to die from COVID-19 are proportional to chances to die from aging itself at any age. The only discrepancy between natural and COVID-19 mortality is observed below the age of 8 years old. Whereas natural death rate is relatively high, COVID-19 mortality is low (no mortality [11]). This discrepancy will be discussed later. But first how do animals, including humans, die from aging?

### **Age-related diseases**

Humans and other animals (including the worm [30] and the fly [31]) do not die from aging itself but from age-related diseases such as ischemic heart disease (IHD), hypertension, diabetes, cancer, Alzheimer’s and Parkinson’s diseases, age-related macular degeneration, osteoporosis and sarcopenia (As we will discuss, even

seemingly non-deadly diseases such as osteoporosis can lead to deadly complications). The incidence of these diseases increases exponentially with age. Some diseases such as obesity, hypertension and diabetes develop earlier in the course of aging. Other diseases, such as Alzheimer’s disease and macular degeneration, are usually diagnosed later [32, 33]. Age-related diseases may also occur in younger people with genetic predisposition and environmental exposure hazards. But even without these factors, diseases develop because they are quasi-programmed (see “Quasi-programmed aging section”). These diseases are not diseases of civilization, as it may seem. Humans simply now live long enough to develop them. Of course, “hazards of civilization” can accelerate them at a younger age.

Aging and its diseases cannot be separated. Healthy aging, or aging without diseases, is merely a slow aging, when biological age is less than chronological age. During a period of seemingly healthy aging, pre-pre-diseases and pre-diseases are progressing until they eventually reach clinical manifestations. Thus, healthy aging progress to unhealthy and pre-diseases become diseases [34].

Age-related diseases and COVID-19 vulnerability are highly intertwined. Patients, who die from COVID-19, otherwise would die from age-related diseases such as heart disease, cancer, diabetes, hypertension, just a year later. COVID-19 approximately doubles a patient’s aging-dependent risk of dying during one year. For example, (numbers are very approximate), a sixty year old woman has 1% chance to die from aging before her 61st birthday. At that age, if infected, the death rate from COVID-19 is around 1% for females. If infected, a patient has approximately doubled chances to die compared with usual age-related mortality during one year. As David Spiegelhalter put it: “getting COVID-19 is like packing a year’s worth of risk into a week or two”. <https://medium.com/wintoncentre/how-much-normal-risk-does-covid-represent-4539118e1196>.

Children and young adults have a very low risk of death from aging-related diseases, so that risk remains extremely low even when doubled.

Although natural mortality is relatively high in the youngest age group, especially in infants, they do not die from age-related diseases of course. Instead, infants are vulnerable to bacterial infections and candida infections due to underdeveloped immune system [35]. Low COVID-19 mortality in the pediatric age group [11] is consistent with the notion that COVID-19 vulnerability is not due to a “weak” immune system. In contrast, as we will discuss in the next section, it is hyper-functional immune response that leads to death from COVID-19 in the elderly by causing cytokine storm.

## Cytokine storm as a hyperfunction

Severe COVID-19 is characterized by hyper-inflammation, cytokine storm, acute respiratory distress syndrome (ARDS), damage to the lung, heart and kidneys [36–39].

In response to viral replication, hyperfunctional monocytes and macrophages infiltrate the lung, causing hyper-inflammation and hyper-secretion of cytokines such as interleukin (IL)-6, IL-2, IL-7, IL-1ra, interferon- $\gamma$  inducible protein (IP)-10, tumor necrosis factor (TNF)- $\alpha$ , ferritin, monocyte chemo-attractant protein (MCP)-1, macrophage inflammatory protein (MIP) 1- $\alpha$ , granulocyte-colony stimulating factor (G-CSF), C-reactive protein (CRP) and procalcitonin. [22, 36–42].

This leads to leukocyte recruitment, vascular permeability, edema and further pulmonary damage in vicious cycle [37, 38, 41, 43, 44]. Hyper-inflammation becomes systemic, in turn causing hyper-coagulation and thrombosis, disseminated intravascular coagulation [45]. This causes injury of distant organs such as the kidneys. Pre-existing organ damage (late stages of age-related diseases) exacerbates organ damage caused by cytokine storm [42, 43, 46]. In addition, cellular hyper-functions and systemic hyper-inflammation may lead to cellular exhaustion, such as exhaustion of lymphocytes (lymphopenia) [47–49]. Hypercoagulation is associated with hyperactive fibrinolysis and increased D-dimer blood levels [23]. Cytokine storm is a systemic hyperfunctional response (Figure 1).

Of course, age-related hyperfunctional response, such as cytokine storm, is not caused by lifelong accumulation of molecular damage. Aging is not caused by molecular damage after all. Instead it's a continuation of developmental/growth programs that lead to hyper-functions and in turn eventually to dysfunctions.

## Hyperfunction theory of quasi-programmed aging

“Quasi” means “resembling” or “seemingly, but not really.” Quasi-program of aging is not a program but a continuation of developmental programs that were not switched off upon their completion [24, 50]. They purposelessly unfold, leading to age-related diseases, secondary organ failure and death. Quasi-programmed (program-like) aging is associated with higher than optimal cellular and systemic functions, which eventually, via cellular exhaustion and organ damage, lead to functional decline (Figure 2). For example, starting from birth, blood pressure increases and continues to increase after organismal growth is completed. Therefore, hypertension is the most prevalent age-related disease. In turn, hypertension can cause organ damage: stroke, infarction and renal failure. Similarly, obesity develops in post-development as a continuation of growth (yet, it can be prevented by low caloric diets, illustrating that quasi-program of aging can be decelerated).

Hyperfunction is an excessive normal cellular function: contraction by smooth muscle cells (SMC), adhesion and aggregation by blood platelets, insulin secretion by

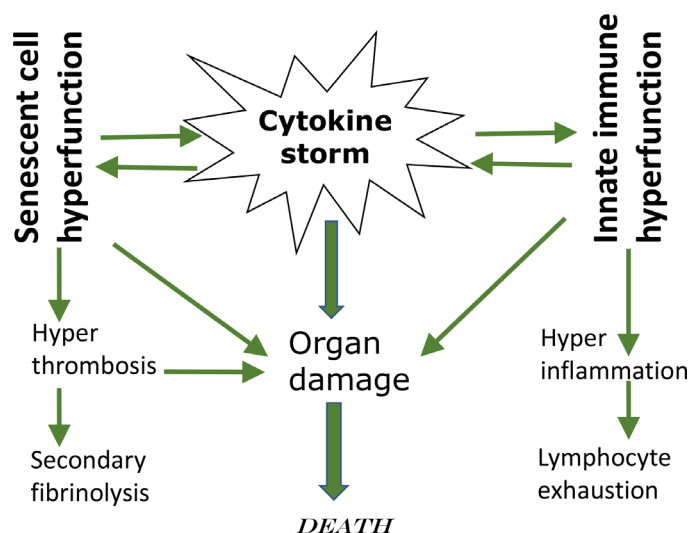

Figure 1. Cytokine storm as a systemic hyperfunction.



beta-cells, lipid accumulation by adipocytes, secretion by stromal and immune cells, oxidative burst by leukocytes, just to name a few. When higher than optimal, they cause vasoconstriction and hypertension, thrombosis, hyperinsulinemia, hypertrophy, hyperplasia, obesity, hyper-secretory phenotype or Senescence-associated secretory phenotype (SASP), hyper-inflammation and so on.

Hyper-function is not necessarily an absolutely increased function. It may be also insufficiently decreased function (relative hyperfunction). Levels of IGF-1 and growth hormone decrease during lifespan. Despite this decrease, IGF-1 levels are still higher than optimal (relative hyper-function) because further genetic decrease in

IGF-1 levels (by genetic means) extends health span and lifespan in mammals [51–53].

Cellular hyperfunctions may eventually switch to cellular exhaustion and loss of functions at late stages. During the course of type II diabetes, mTOR overactivation and hyperinsulinemia eventually lead to beta-cell exhaustion and insulin insufficiency, from pre-diabetes to diabetes [54, 55]. As another example, after puberty, hyperstimulation of the ovary eventually leads to oocyte exhaustion and menopause (see Figure 3 in ref. [29]). Depletion of naïve lymphocytes is another example, as reviewed here later. Age-related alterations are mostly noticed when they switch to functional decline, which is a late event.

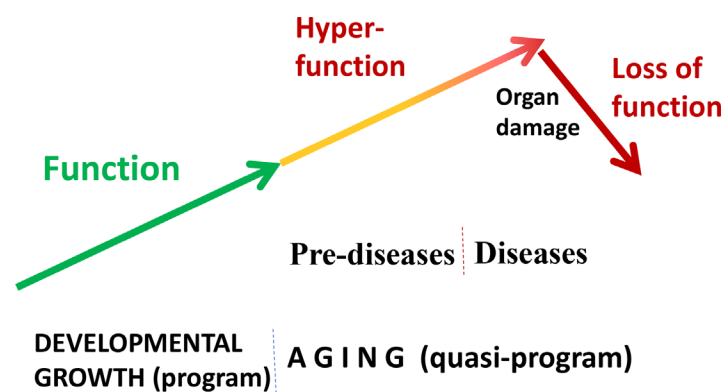

**Figure 2. Quasi-programmed hyperfunctional aging.** Aging is a continuation of developmental programs that were not switched off upon their completion. An increase in cellular and systemic functions (manifested as pre-diseases and then as diseases) leads to eventual organ damage and secondary loss of function.

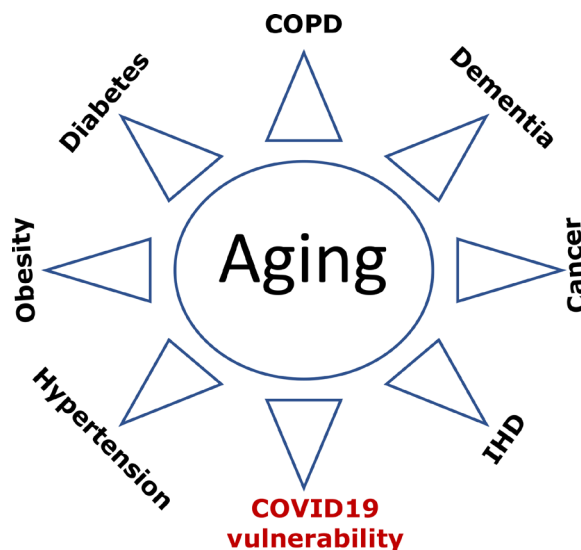

**Figure 3. COVID-19 vulnerability as an age-related disease.** Age-related diseases, including COVID-19 vulnerability, are manifestations of aging. Abbreviations: Ischemic heart disease (IHD); Chronic obstructive pulmonary disease (COPD).

In some cases, functional decline can be primary and programmed. For example, thymus involution (replacement of T cells by adipocytes) starts early in life, accelerates at puberty and continues later. Still loss of thymocytes and their niches may be in part due to adipocyte hyperplasia and hypertrophy [56]. In fact, obesity accelerates involution, whereas calorie restriction decelerates it [57, 58]. Furthermore, the obliteration of sex hormones decelerates or even reverses thymus involution [59]. Thus, involution is triggered by adipocyte hyperplasia and increased production of sex hormones during puberty [56].

Quasi-programmed aging is not driven by molecular damage. It is driven by nutrient/hormone/cytokine-sensing and growth-promoting signaling pathways such as Target of Rapamycin (TOR; mTOR), which are involved in developmental growth and later cause hyperfunctional aging and its diseases [24, 26].

### **Covid-19 vulnerability as an age-related syndrome**

What is the cause-effect relationship between age-related diseases and COVID-19 lethality? Do patients die from age-related diseases, complicated by COVID-19? Or, in contrast, do these various diseases make COVID-19 infection lethal? Both scenarios take place to some extent. However, the relationship is mostly indirect. Both age-related diseases and COVID-vulnerability result from the same underlying cause (Figure 3). This is why they are highly correlated. The cause is aging itself. Aging is manifested by a sum of deadly - and not so deadly - diseases and conditions ranging from cancer to grey hair. Although not all diseases seem to be deadly, they can cause complications such as stroke, ventricular fibrillation, renal failure, lung edema. Even sarcopenia and osteoporosis lead to falls and broken bones culminating in a deadly sequence of events. Cosmetic manifestations such as aging spots and wrinkles, while not deadly by themselves, can be manifestations of other diseases. For example, baldness correlates with prostate enlargement [60], and the later can lead to urinary obstruction and renal failure.

Diseases occur together. For example, chronic obstructive pulmonary disease (COPD) is associated with diabetes, cardiovascular disease and hypertension [61]. If a person has one disease (e.g., diabetes), this patient has higher chances of having other diseases (e.g., hypertension, IHD, cancer) or conditions, including COVID-19 vulnerability, which is revealed only during infection but can be predicted by pre-existing diseases.

Aging is initially driven by an increase in cellular and systemic functions (hyperfunction), leading to age-

related conditions. For example, hypertension is a systemic hyperfunction due to hyperfunction of multiple cell types such as arterial smooth muscle cells (aSMC). Similarly, COVID-19-vulnerability is associated with hyperfunction of inflammatory cells that, in response to COVID-19 infection, causes cytokine storm, hyper-coagulation and damage of the lung and distant organs.

The COVID-19 vulnerability syndrome is an aging-related disease, strictly dependent on biological age, associated with other age-related diseases, and exemplified by hyper-functional response to infection.

### **Inflamm-aging and immunosenescence**

With hundreds of cell types acting in concert, the immune system is so complex that we cannot discuss age-related alterations without oversimplification. The most noticeable alteration is that memory T and B cells replace naïve T and B cells [62]. (This seems natural since life-long exposure to pathogens replaces naïve cells by memory cells). Replacement of naïve immune cells decreases adaptive responses to novel antigens such as SARS-CoV-2. In contrast, immune protection by memory T cells from viral re-infection with known pathogens is usually increased with age [62].

Immune responses are roughly divided into (a) innate responses, carried mostly by neutrophils, macrophages and NK cells, which react to pathogen rapidly and nonspecifically, and (b) adaptive responses, carried by T and B lymphocytes, which are delayed, slower and specific (e.g., antigen-specific clonal expansion of T and B lymphocytes and antibody production by B lymphocytes) [63–65]. In the elderly, immune responses to SARS-CoV-1/2 are “stuck in innate immunity,” with insufficient progression to adaptive immunity [37]. However, decline in adaptive response, such as antibody production, plays little role in COVID-19 mortality. It is hyper-functional innate immunity, hyper-inflammation, cytokine storm and hyper-coagulation that lead to organ failure and death. In agreement, hyper inflammatory response rather than high virus numbers leads to death of SARS-CoV-infected old nonhuman primates [66].

Aging is associated with diseases of immune hyperfunction such as autoimmune disorders with paradoxical increase in certain signaling pathways and cytokine levels [67–69].

In the elderly, innate immune cells are in a state of sustained activation, producing pro-inflammatory cytokines [67, 70–72]. Increased pro-inflammatory activity by the innate immune system, especially by monocytes/macrophages, is a state of alertness and hyper-reactivity on the cost of potential age-related inflammatory diseases

[67, 70–72]. Whereas some functions are decreased, others are increased. According to the inflamm-aging concept, innate immune system overtakes adaptive immune system in aging. Cause-effect relationships are bi-directional: immunosenescence (namely, a decrease in adaptive response) is a cause and consequence of inflamm-aging [67, 70–72].

We can consider inflamm-aging as an example of hyper-function. While some functions are decreased, others are increased. Hyper-function is damaging. (In analogy, increased electric power, without an adaptor, would damage a laptop). Damaging hyper-functions can lead to loss of function and cellular exhaustion. And vice versa, loss of function may cause compensatory hyper-functions of another components.

### Cellular senescence as a continuation of growth

Cellular senescence is a continuation of cellular growth, when actual growth is completed [73, 74]. In proliferating cells, cellular mass growth is balanced by cell division. Cells grow in size and then divide. When the cell cycle is blocked (e.g., p21 and p16), then growth-promoting pathways such as mTOR and MAPK drive conversion to senescence (geroconversion) [24, 74, 75]. During geroconversion, cells become hypertrophic and “fat”. Cellular functions increase: hyper-secretion and lysosomal hyper-function are manifested by SASP and beta-Gal staining. Hyper-activated growth-promoting pathways cause compensatory resistance to growth factors/insulin, permanent loss of re-proliferative potential [74]. Rapamycin, everolimus, pan-mTOR and MAPK inhibitors slows down geroconversion, maintaining reversible quiescence instead of senescence [73, 76–88].

Geroconversion is a continuation of cellular growth [73, 74]. Similarly, aging is a continuation of developmental growth (see Figure 1 in ref. [89]). When the developmental program is completed, it becomes a quasi-program of aging. As discussed in detail, chronically activated nutrient-sensing and growth-promoting pathways drive age-related diseases, culminating in organismal death [24, 26].

Age-related diseases are quasi-programmed. Aging is a common cause of age-related diseases, a sum of all age-related diseases. They are diseases of hyper-function, secondary hypo-function and compensation reactions [25]; they are deadly manifestations of aging.

From activation of cellular functions to systemic hyperfunctions, from diseases to organ damage and death, hyperfunction theory of quasi-programmed aging describes the sequence of events [26]. And as discussed

in 2006, suppression of aging by gero-suppressants, such as rapamycin, will prevent and treat all age-related diseases [24]. This point of view is becoming widely accepted and, in recent literature, quasi-programmed model of diseases (2006) is called “geroscience hypothesis” [2, 90].

### Figuratively, rapamycin rejuvenates immunity [91]

If aging were functional decline due to accumulation of molecular damage, then it would be near to impossible to restore functions and rejuvenate the immune system. In contrast, if functional decline is secondary to hyperfunctions (see Figure 2 in ref. [89]), these hyperfunctions can be suppressed pharmacologically to restore lost functions. Typical drugs are inhibitors of their targets, rather than activators, so they decrease functions of their targets. By decreasing hyper-functions, which otherwise lead to secondary loss of functions, rapamycin may restore “lost” functions (Figure 4).

Rapamycin improves vaccination against viruses such as influenza in old mice, monkeys and humans [92–100]. Importantly, rapamycin increases pathogen-specific but not graft-reactive CD8<sup>+</sup> T cell responses [95, 101]. Therefore, rapamycin and everolimus can both be used to prevent donor organ rejection and improve adaptive immunity against new pathogens [96].

Differentiation is an increase of tissue-specific cellular functions. Terminally differentiated B, T, and NK cells can rapidly react to already known pathogens [102]. Decrease in naïve T and B lymphocytes (and thus diminished response to novel antigens) results in part from cellular hyper-differentiation in the immune system [64, 103]. Hyper-functional differentiation can be counteracted by rapamycin [98].

As another example, age-related exhaustion of stem cells is partially due to loss of quiescence caused by growth over-stimulation [92, 104–106]. In general, senescent cells characterized by hyper-proliferative drive coupled with cell cycle arrest [77]. In young mice, mTOR hyper-activation causes senescence of hematopoietic stem cells (HSC) and decreases lymphopoiesis [92]. In old mice, rapamycin rejuvenates hematopoiesis, and improves vaccination against influenza virus [92].

Third, production of lymphoid cells may be decreased because of disruption of hypoxic niches due to adipocytes hyperplasia [56, 107]. Hypoxic niches can preserve HSC [108, 109] probably because hypoxia inhibits mTOR and cellular senescence [110]. In agreement, rapamycin preserves HSCs [92, 98, 111, 112] reduces the proportion of memory cells and maintains a pool of naïve T cells [92, 98].

Fourth, growth factor (GF)- and insulin-resistance is loss of function because cells cannot respond to GF/insulin. But it may be caused by over-activated mTOR, which via S6K/IRS feedback loop blocks insulin and GF signaling. Rapamycin abrogates the loop restoring signaling [113–118].

### Anti-aging medicine

A high prevalence of age-related diseases, often called “diseases of civilization,” is a success story of modern medicine. In the past, most people did not live long enough to develop age-related diseases and those who developed them died soon after. Due to medical advances, people survive to 85 on average, despite suffering from age-related diseases. Standard medicine preferentially extends life span, without necessarily affecting health span (see Figure 3 in ref. [119]). For example, defibrillation and coronary stenting can save life but not cure heart disease. It is anti-aging interventions that extend health span, delaying diseases, thus extending lifespan. Aging is a common cause of all age-related diseases. By suppressing aging, anti-aging interventions may delay all age-related diseases [119].

As a well-known example, low calorie diets such as calorie restriction, intermittent fasting, and low carbohydrate diets extend both health and lifespan. Figuratively, low calorie diets prolong life by improving health. Nutrients and obesity activate growth-promoting pathways (e.g., mTOR), thus accelerating development of quasi-programmed (age-related) diseases. Obesity is

associated with all age-related diseases from cancer to Alzheimer’s and from diabetes to sarcopenia. COVID-19 vulnerability is also associated with obesity [9, 19, 20, 22]. According to hyperfunction theory, obesity accelerates aging and all age-related conditions including COVID-19 vulnerability.

Diabetes is one of main risk factors of death in COVID-19 [5, 6, 12, 13, 15, 21]. Can type 2 diabetes, an age-related disease, be reversed? In remarkable studies, it was shown that a brief course (6-8 weeks) of very low calorie diets (VLCDs) can reverse type II diabetes. In one study, VLCD reversed diabetes in 46% of patients with up to a 6-year history of diabetes [120]. VLCD is most effective for its prevention and at early stages of diabetes [121]. This anti-aging modality is so simple that remission can be achieved at home by health-motivated individuals [122]. Simultaneously, it treats other age-related diseases such hypertension [123]. Obesity is associated with other diseases of hyperfunction from diabetes and sarcopenia to cancer and Alzheimer’s disease. Since age-related diseases are predictors of COVID-19 mortality, VLCD in theory may decrease COVID-19 vulnerability.

### Rapamycin and everolimus as anti-aging drugs

In the soil of Easter Island, a complex bacteria produces anti-fungal antibiotic rapamycin to suppress yeast growth but, as a by-product, it also suppresses yeast aging (quasi-programmed aging is a continuation of growth). Approved for human use in 1999, Rapamycin

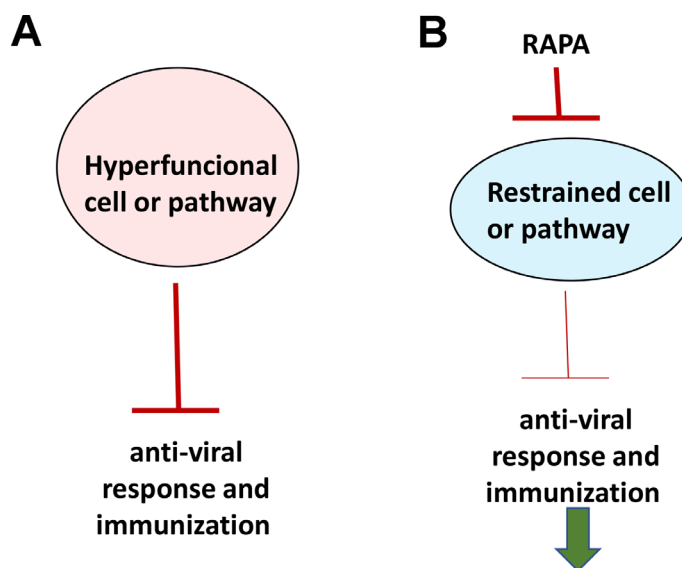

**Figure 4. Rejuvenating immunity by inhibiting hyperfunction.** (A) Specific hyper-functional cells (or signaling pathways) can inhibit some other cell types (or pathways) that are needed for proper anti-viral response and immunization. (B) By inhibiting hyper-functional cells or pathways, rapamycin can reactivate “loss-of-function” otherwise suppressed by hyper-functional cells or pathways.

(Sirolimus) and its close analog Everolimus are widely used in several diseases including cancer and organ transplantation. Hundreds of clinical trials (and twenty years of clinical practice) have ensured their safety and good tolerability especially in healthy older adults [119].

Currently, several anti-aging clinics prescribe rapamycin out of label to prevent age-related diseases and slow aging. Hundreds of recent reviews discussed rapamycin and everolimus in detail, so I will just emphasize a few points:

1. Crucial prediction of hyper-function theory of quasi-programmed aging in 2006 was that rapamycin will slow aging, extend healthspan and lifespan and decrease all age-related [124]. It has been confirmed: it extends lifespan in animals from worm to mammals. In some strains of short-lived mutant mice, it extends life span two fold [98, 125].
2. Rapamycin slows geroconversion to cellular senescence in cell culture [74].
3. mTOR is a potential therapeutic target in chronic obstructive pulmonary disease COPD [126], [127]. Rapamycin (sirolimus) is already approved and successfully used in lymphangioleiomyomatosis (LAM), a progressive, cystic lung disease, associated with inappropriate activation of mTOR [128]. Long-term daily use of rapamycin improves lung function without causing serious side effects (and of course no even minor side effects in the lung, given that rapamycin improves lung function) [128].
4. Despite widespread misunderstanding, rapamycin and everolimus do not cause diabetes. In contrast, they prevent diabetic complications in animals with diabetes (see for references [129]). In rodents, in some conditions they may cause symptoms of starvation pseudo-diabetes similar to prolong fasting and ketogenic diet [129]. Although, the *Johnson* study found a slight but significant correlation between Medicare billing for insulin and the use of rapamycin in renal transplant patients, this correlation was mechanistically explained by interaction of rapamycin with two other drugs used in the same patients [130, 131]. In cancer patients, everolimus may cause reversible hyperglycemia as a mild, infrequent and reversible side effect after several weeks of daily high doses of everolimus and rapamycin [132]. Mechanistically, everolimus decrease insulin production, not causing insulin resistance [132]. If anything, everolimus and rapamycin can be considered to treat complications of type II diabetes and prevent hyperinsulinemia and obesity ([129] and references within). What

actually contributes to type 2 diabetes is excess of nutrients (and especially carbohydrates), which activate mTOR and cause hyperinsulinemia and insulin resistance.

## Potential applications of rapamycin/everolimus to COVID-19

As soon as COVID-19 epidemic started, it become clear that COVID-19 vulnerability is an aging-dependent condition and the use of rapamycin (Sirolimus) was immediately suggested by independent researchers [1, 3, 133–137]. These proposals were based on a mixture of several rationales, which need to be clearly distinguished. In theory, there are at least three independent applications of rapamycin and everolimus for COVID-19. Currently, they all are still hypothetical.

1. Anti-aging effect (Figure 5). By decreasing biological age and preventing age-related diseases, a long-term rapamycin therapy may in theory decrease COVID-19 mortality rate in the elderly. Anti-aging application is especially important because it is beneficial regardless of COVID-19. After all, mortality rate from aging and its diseases is 100%, causing more than 2 million deaths in the USA annually. Continuous use of rapamycin is expected to improve health, decrease age-related diseases and extend healthy lifespan, rendering individuals less vulnerable, when infected with the virus.

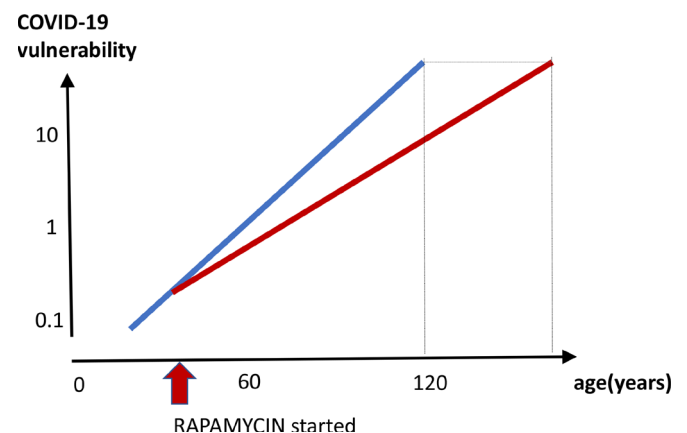

**Figure 5. Prevention of COVID-19 vulnerability by staying young.** Hypothetical graph in the absence of COVID-19. COVID-19 vulnerability (log scale) increases exponentially with age (blue line). The line ends at age 120, a maximum recorded age for humans. In theory, a continuous rapamycin treatment would slow down an increase of the vulnerability with age (red line). The increase is still logarithmic but at a different slope, because rapamycin slows the aging process. The maximum lifespan, in the absence of COVID-19, is extended because the 100% natural death threshold is achieved later.



2. Rejuvenating immunity. As we discussed in section “Figuratively, rapamycin rejuvenates immunity” [91], mTOR inhibitors can improve immunity to viral infections, improve immunization and vaccination to some viruses such as flu [92–100, 111, 112, 138]. In addition, viruses such as flu [139] and coronavirus (MERS-CoV) [140] depend on mTOR activity for replication. Currently, however, there are no data regarding COVID-19. Although aimed to evaluate safety, Phase 1 clinical trial “Sirolimus in COVID-19 Phase 1 (SirCO-1)” may reveal anti-viral effects too  
<https://clinicaltrials.gov/ct2/show/NCT04371640>.
3. Potential suppression of cytokine storm and hyper-inflammation (Figure 1). As we discussed in the section “Cytokine storm is a hyperfunction”, cytokine storm and hyper-inflammation is a main cause of death in COVID-19 pneumonia [36–40, 42, 45, 135, 141–143]. Rapamycin, an anti-inflammatory agent, inhibits hyper-functions, cellular senescence and decrease secretion of cytokines ([74, 81, 144]. Rapamycin inhibits the Jak2/Stat4 signaling pathway [145] and reduces IF- $\gamma$  and TNF- $\alpha$  levels [112]. Rapamycin (Sirolimus) treatment improves outcomes in patients with severe H1N1 pneumonia and acute respiratory failure and was associated with improvement in virus clearance, and shortened ventilator days [146]. Clinical trial “Sirolimus Treatment in Hospitalized Patients With COVID-19 Pneumonia (SCOPE)” has been started  
<https://clinicaltrials.gov/ct2/show/NCT04341675>.

## Disclaimer

This review is intended for a professional audience, to stimulate new ideas and to aid the global efforts to develop effective treatments for COVID-19 disease. This article does not represent medical advice or recommendations to patients. The media should exercise caution and seek expert medical advice for interpretation, when referring to this article.

## CONFLICTS OF INTEREST

The author declares no conflicts of interest.

## REFERENCES

1. Zhavoronkov A. Geroprotective and senoremediative strategies to reduce the comorbidity, infection rates, severity, and lethality in gerophilic and gerolaviv infections. *Aging (Albany NY)*. 2020; 12:6492–510.  
<https://doi.org/10.18632/aging.102988>  
PMID: [32229705](https://pubmed.ncbi.nlm.nih.gov/32229705/)
2. Promislow DE. A geroscience perspective on COVID-19 mortality. *J Gerontol A Biol Sci Med Sci*. 2020. [Epub ahead of print].  
<https://doi.org/10.1093/gerona/glaa094>  
PMID: [32300796](https://pubmed.ncbi.nlm.nih.gov/32300796/)
3. Sargiacomo C, Sotgia F, Lisanti MP. COVID-19 and chronological aging: senolytics and other anti-aging drugs for the treatment or prevention of corona virus infection? *Aging (Albany NY)*. 2020; 12:6511–17.  
<https://doi.org/10.18632/aging.103001>  
PMID: [32229706](https://pubmed.ncbi.nlm.nih.gov/32229706/)
4. Leung C. Risk factors for predicting mortality in elderly patients with COVID-19: a review of clinical data in China. *Mech Ageing Dev*. 2020; 188:111255.  
<https://doi.org/10.1016/j.mad.2020.111255>  
PMID: [32353398](https://pubmed.ncbi.nlm.nih.gov/32353398/)
5. Zhou F, Yu T, Du R, Fan G, Liu Y, Liu Z, Xiang J, Wang Y, Song B, Gu X, Guan L, Wei Y, Li H, et al. Clinical course and risk factors for mortality of adult inpatients with COVID-19 in wuhan, China: a retrospective cohort study. *Lancet*. 2020; 395:1054–62.  
[https://doi.org/10.1016/S0140-6736\(20\)30566-3](https://doi.org/10.1016/S0140-6736(20)30566-3)  
PMID: [32171076](https://pubmed.ncbi.nlm.nih.gov/32171076/)
6. Wu C, Chen X, Cai Y, Xia J, Zhou X, Xu S, Huang H, Zhang L, Zhou X, Du C, Zhang Y, Song J, Wang S, et al. Risk factors associated with acute respiratory distress syndrome and death in patients with coronavirus disease 2019 pneumonia in wuhan, China. *JAMA Intern Med*. 2020. [Epub ahead of print].  
<https://doi.org/10.1001/jamainternmed.2020.0994>  
PMID: [32167524](https://pubmed.ncbi.nlm.nih.gov/32167524/)
7. Lauc G, Sinclair D. Biomarkers of biological age as predictors of COVID-19 disease severity. *Aging (Albany NY)*. 2020; 12:6490–91.  
<https://doi.org/10.18632/aging.103052>  
PMID: [32268300](https://pubmed.ncbi.nlm.nih.gov/32268300/)
8. Du RH, Liang LR, Yang CQ, Wang W, Cao TZ, Li M, Guo GY, Du J, Zheng CL, Zhu Q, Hu M, Li XY, Peng P, Shi HZ. Predictors of mortality for patients with COVID-19 pneumonia caused by SARS-CoV-2: a prospective cohort study. *Eur Respir J*. 2020; 55:2000524.  
<https://doi.org/10.1183/13993003.00524-2020>  
PMID: [32269088](https://pubmed.ncbi.nlm.nih.gov/32269088/)
9. Palaiodimos L, Kokkinidis DG, Li W, Karamanis D, Ognibene J, Arora S, Southern WN, Mantzoros CS. Severe obesity, increasing age and male sex are independently associated with worse in-hospital outcomes, and higher in-hospital mortality, in a cohort of patients with COVID-19 in the bronx, new york. *Metabolism*. 2020; 108:154262.  
<https://doi.org/10.1016/j.metabol.2020.154262>  
PMID: [32422233](https://pubmed.ncbi.nlm.nih.gov/32422233/)

10. Banerjee A, Pasea L, Harris S, Gonzalez-Izquierdo A, Torralbo A, Shallcross L, Noursadeghi M, Pillay D, Sebire N, Holmes C, Pagel C, Wong WK, Langenberg C, et al. Estimating excess 1-year mortality associated with the COVID-19 pandemic according to underlying conditions and age: a population-based cohort study. *Lancet*. 2020; 395:1715–25.  
[https://doi.org/10.1016/S0140-6736\(20\)30854-0](https://doi.org/10.1016/S0140-6736(20)30854-0)  
PMID:[32405103](https://pubmed.ncbi.nlm.nih.gov/32405103/)
11. Lu Q, Shi Y. Coronavirus disease (COVID-19) and neonate: what neonatologist need to know. *J Med Virol*. 2020; 10:1002.  
<https://doi.org/10.1002/jmv.25740>  
PMID:[32115733](https://pubmed.ncbi.nlm.nih.gov/32115733/)
12. Hussain A, Bhowmik B, do Vale Moreira NC. COVID-19 and diabetes: knowledge in progress. *Diabetes Res Clin Pract*. 2020; 162:108142.  
<https://doi.org/10.1016/j.diabres.2020.108142>  
PMID:[32278764](https://pubmed.ncbi.nlm.nih.gov/32278764/)
13. Huang I, Lim MA, Pranata R. Diabetes mellitus is associated with increased mortality and severity of disease in COVID-19 pneumonia - a systematic review, meta-analysis, and meta-regression. *Diabetes Metab Syndr*. 2020; 14:395–403.  
<https://doi.org/10.1016/j.dsx.2020.04.018>  
PMID:[32334395](https://pubmed.ncbi.nlm.nih.gov/32334395/)
14. Mehra MR, Desai SS, Kuy S, Henry TD, Patel AN. Cardiovascular disease, drug therapy, and mortality in covid-19. *N Engl J Med*. 2020. [Epub ahead of print].  
<https://doi.org/10.1056/NEJMoa2007621>  
PMID:[32356626](https://pubmed.ncbi.nlm.nih.gov/32356626/)
15. Yan Y, Yang Y, Wang F, Ren H, Zhang S, Shi X, Yu X, Dong K. Clinical characteristics and outcomes of patients with severe covid-19 with diabetes. *BMJ Open Diabetes Res Care*. 2020; 8:e001343.  
<https://doi.org/10.1136/bmjdr-2020-001343>  
PMID:[32345579](https://pubmed.ncbi.nlm.nih.gov/32345579/)
16. Guzik TJ, Mohiddin SA, Dimarco A, Patel V, Savvatis K, Marelli-Berg FM, Madhur MS, Tomaszewski M, Maffia P, D'Acquisto F, Nicklin SA, Marian AJ, Nosalski R, et al. COVID-19 and the cardiovascular system: implications for risk assessment, diagnosis, and treatment options. *Cardiovasc Res*. 2020. [Epub ahead of print].  
<https://doi.org/10.1093/cvr/cvaa106> PMID:[32352535](https://pubmed.ncbi.nlm.nih.gov/32352535/)
17. Hu J, Zhang X, Zhang X, Zhao H, Lian J, Hao S, Jia H, Yang M, Lu Y, Xiang D, Cai H, Zhang S, Gu J, et al. COVID-19 patients with hypertension have more severity condition, and ACEI/ARB treatment have no influence on the clinical severity and outcome. *J Infect*. 2020; S0163-4453:30334–30.  
<https://doi.org/10.1016/j.jinf.2020.05.056>  
PMID:[32474032](https://pubmed.ncbi.nlm.nih.gov/32474032/)
18. Zhang J, Wu J, Sun X, Xue H, Shao J, Cai W, Jing Y, Yue M, Dong C. Association of hypertension with the severity and fatality of SARS-CoV-2 infection: a meta-analysis. *Epidemiol Infect*. 2020; 148:e106.  
<https://doi.org/10.1017/S095026882000117X>  
PMID:[32460927](https://pubmed.ncbi.nlm.nih.gov/32460927/)
19. Dietz W, Santos-Burgoa C. Obesity and its implications for COVID-19 mortality. *Obesity (Silver Spring)*. 2020; 28:1005.  
<https://doi.org/10.1002/oby.22818>  
PMID:[32237206](https://pubmed.ncbi.nlm.nih.gov/32237206/)
20. Zhang F, Xiong Y, Wei Y, Hu Y, Wang F, Li G, Liu K, Du R, Wang CY, Zhu W. Obesity predisposes to the risk of higher mortality in young COVID-19 patients. *J Med Virol*. 2020. [Epub ahead of print].  
<https://doi.org/10.1002/jmv.26039>  
PMID:[32437016](https://pubmed.ncbi.nlm.nih.gov/32437016/)
21. Wang B, Li R, Lu Z, Huang Y. Does comorbidity increase the risk of patients with COVID-19: evidence from meta-analysis. *Aging (Albany NY)*. 2020; 12:6049–57.  
<https://doi.org/10.18632/aging.103000>  
PMID:[32267833](https://pubmed.ncbi.nlm.nih.gov/32267833/)
22. Korakas E, Ikonomidis I, Kousathana F, Balampanis K, Kountouri A, Raptis A, Palaodimou L, Kokkinos A, Lambadiari V. Obesity and COVID-19: immune and metabolic derangement as a possible link to adverse clinical outcomes. *Am J Physiol Endocrinol Metab*. 2020. [Epub ahead of print].  
<https://doi.org/10.1152/ajpendo.00198.2020>  
PMID:[32459524](https://pubmed.ncbi.nlm.nih.gov/32459524/)
23. Ji HL, Zhao R, Matalon S, Matthay MA. Elevated plasmin(ogen) as a common risk factor for COVID-19 susceptibility. *Physiol Rev*. 2020; 100:1065–75.  
<https://doi.org/10.1152/physrev.00013.2020>  
PMID:[32216698](https://pubmed.ncbi.nlm.nih.gov/32216698/)
24. Blagosklonny MV. Aging and immortality: quasi-programmed senescence and its pharmacologic inhibition. *Cell Cycle*. 2006; 5:2087–102.  
<https://doi.org/10.4161/cc.5.18.3288>  
PMID:[17012837](https://pubmed.ncbi.nlm.nih.gov/17012837/)
25. Blagosklonny MV. Validation of anti-aging drugs by treating age-related diseases. *Aging (Albany NY)*. 2009; 1:281–88.  
<https://doi.org/10.18632/aging.100034>  
PMID:[20157517](https://pubmed.ncbi.nlm.nih.gov/20157517/)
26. Blagosklonny MV. Prospective treatment of age-related diseases by slowing down aging. *Am J Pathol*. 2012; 181:1142–46.  
<https://doi.org/10.1016/j.ajpath.2012.06.024>  
PMID:[22841821](https://pubmed.ncbi.nlm.nih.gov/22841821/)
27. Gebhard C, Regitz-Zagrosek V, Neuhauser HK, Morgan R, Klein SL. Impact of sex and gender on COVID-19

- outcomes in europe. *Biol Sex Differ*. 2020; 11:29.  
<https://doi.org/10.1186/s13293-020-00304-9>  
PMID:32450906
28. Jin JM, Bai P, He W, Wu F, Liu XF, Han DM, Liu S, Yang JK. Gender differences in patients with COVID-19: focus on severity and mortality. *Front Public Health*. 2020; 8:152.  
<https://doi.org/10.3389/fpubh.2020.00152>  
PMID:32411652
  29. Blagosklonny MV. Why men age faster but reproduce longer than women: mTOR and evolutionary perspectives. *Aging (Albany NY)*. 2010; 2:265–73.  
<https://doi.org/10.18632/aging.100149>  
PMID:20519781
  30. Wang H, Zhang Z, Gems D. Monsters in the uterus: teratoma-like tumors in senescent *C. Elegans* result from a parthenogenetic quasi-program. *Aging (Albany NY)*. 2018; 10:1188–89.  
<https://doi.org/10.18632/aging.101486>  
PMID:29923830
  31. Xi J, Cai J, Cheng Y, Fu Y, Wei W, Zhang Z, Zhuang Z, Hao Y, Lilly MA, Wei Y. The TORC1 inhibitor Nprl2 protects age-related digestive function in *Drosophila*. *Aging (Albany NY)*. 2019; 11:9811–28.  
<https://doi.org/10.18632/aging.102428>  
PMID:31712450
  32. Blagosklonny MV. Answering the ultimate question “what is the proximal cause of aging?”. *Aging (Albany NY)*. 2012; 4:861–77.  
<https://doi.org/10.18632/aging.100525>  
PMID:23425777
  33. Corrada MM, Brookmeyer R, Paganini-Hill A, Berlau D, Kawas CH. Dementia incidence continues to increase with age in the oldest old: the 90+ study. *Ann Neurol*. 2010; 67:114–21.  
<https://doi.org/10.1002/ana.21915>  
PMID:20186856
  34. Blagosklonny MV. Disease or not, aging is easily treatable. *Aging (Albany NY)*. 2018; 10:3067–78.  
<https://doi.org/10.18632/aging.101647>  
PMID:30448823
  35. Williams EJ, Embleton ND, Bythell M, Ward Platt MP, Berrington JE. The changing profile of infant mortality from bacterial, viral and fungal infection over two decades. *Acta Paediatr*. 2013; 102:999–1004.  
<https://doi.org/10.1111/apa.12341>  
PMID:23826761
  36. Akhmerov A, Marbán E. COVID-19 and the heart. *Circ Res*. 2020; 126:1443–55.  
<https://doi.org/10.1161/CIRCRESAHA.120.317055>  
PMID:32252591
  37. Nikolich-Zugich J, Knox KS, Rios CT, Natt B, Bhattacharya D, Fain MJ. SARS-CoV-2 and COVID-19 in older adults: what we may expect regarding pathogenesis, immune responses, and outcomes. *Geroscience*. 2020; 42:505–14.  
<https://doi.org/10.1007/s11357-020-00186-0>  
PMID:32274617
  38. Ye Q, Wang B, Mao J. The pathogenesis and treatment of the ‘Cytokine storm’ in COVID-19. *J Infect*. 2020; 80:607–13.  
<https://doi.org/10.1016/j.jinf.2020.03.037>  
PMID:32283152
  39. Henderson LA, Canna SW, Schulert GS, Volpi S, Lee PY, Kernan KF, Caricchio R, Mahmud S, Hazen MM, Halyabar O, Hoyt KJ, Han J, Grom AA, et al. On the alert for cytokine storm: immunopathology in COVID-19. *Arthritis Rheumatol*. 2020; 10:1002.  
<https://doi.org/10.1002/art.41285> PMID:32293098
  40. Yao Z, Zheng Z, Wu K, Junhua Z. Immune environment modulation in pneumonia patients caused by coronavirus: SARS-CoV, MERS-CoV and SARS-CoV-2. *Aging (Albany NY)*. 2020; 12:7639–51.  
<https://doi.org/10.18632/aging.103101>  
PMID:32364527
  41. Yang Y, Shen C, Li J, Yuan J, Wei J, Huang F, Wang F, Li G, Li Y, Xing L, Peng L, Yang M, Cao M, et al. Plasma IP-10 and MCP-3 levels are highly associated with disease severity and predict the progression of COVID-19. *J Allergy Clin Immunol*. 2020; S0091-6749:30576–75.  
<https://doi.org/10.1016/j.jaci.2020.04.027>  
PMID:32360286
  42. McGonagle D, Sharif K, O’Regan A, Bridgewood C. The role of cytokines including interleukin-6 in COVID-19 induced pneumonia and macrophage activation syndrome-like disease. *Autoimmun Rev*. 2020; 19:102537.  
<https://doi.org/10.1016/j.autrev.2020.102537>  
PMID:32251717
  43. Vaninov N. In the eye of the COVID-19 cytokine storm. *Nat Rev Immunol*. 2020; 20:277.  
<https://doi.org/10.1038/s41577-020-0305-6>  
PMID:32249847
  44. Rothan HA, Byrareddy SN. The epidemiology and pathogenesis of coronavirus disease (COVID-19) outbreak. *J Autoimmun*. 2020; 109:102433.  
<https://doi.org/10.1016/j.jaut.2020.102433>  
PMID:32113704
  45. Dolhnikoff M, Duarte-Neto AN, de Almeida Monteiro RA, da Silva LF, de Oliveira EP, Saldiva PH, Mauad T, Negri EM. Pathological evidence of pulmonary thrombotic phenomena in severe COVID-19. *J Thromb Haemost*. 2020; 18:1517–19.

- <https://doi.org/10.1111/jth.14844> PMID:32294295
46. Siddiqi HK, Mehra MR. COVID-19 illness in native and immunosuppressed states: a clinical-therapeutic staging proposal. *J Heart Lung Transplant*. 2020; 39:405–07.  
<https://doi.org/10.1016/j.healun.2020.03.012>  
PMID:32362390
47. Fathi N, Rezaei N. Lymphopenia in COVID-19: therapeutic opportunities. *Cell Biol Int*. 2020. [Epub ahead of print].  
<https://doi.org/10.1002/cbin.11403>  
PMID:32458561
48. Cao X. COVID-19: immunopathology and its implications for therapy. *Nat Rev Immunol*. 2020; 20:269–70.  
<https://doi.org/10.1038/s41577-020-0308-3>  
PMID:32273594
49. Tan L, Wang Q, Zhang D, Ding J, Huang Q, Tang YQ, Wang Q, Miao H. Lymphopenia predicts disease severity of COVID-19: a descriptive and predictive study. *Signal Transduct Target Ther*. 2020; 5:33.  
<https://doi.org/10.1038/s41392-020-0148-4>  
PMID:32296069
50. Blagosklonny MV. Aging is not programmed: genetic pseudo-program is a shadow of developmental growth. *Cell Cycle*. 2013; 12:3736–42.
51. Junnila RK, List EO, Berryman DE, Murrey JW, Kopchick JJ. The GH/IGF-1 axis in ageing and longevity. *Nat Rev Endocrinol*. 2013; 9:366–76.  
<https://doi.org/10.1038/nrendo.2013.67>  
PMID:23591370
52. Bartke A, List EO, Kopchick JJ. The somatotrophic axis and aging: benefits of endocrine defects. *Growth Horm IGF Res*. 2016; 27:41–45.  
<https://doi.org/10.1016/j.ghir.2016.02.002>  
PMID:26925766
53. Junnila RK, Duran-Ortiz S, Suer O, Sustarsic EG, Berryman DE, List EO, Kopchick JJ. Disruption of the GH receptor gene in adult mice increases maximal lifespan in females. *Endocrinology*. 2016; 157:4502–13.  
<https://doi.org/10.1210/en.2016-1649>  
PMID:27732088
54. Guillén C, Benito M. mTORC1 overactivation as a key aging factor in the progression to type 2 diabetes mellitus. *Front Endocrinol (Lausanne)*. 2018; 9:621.  
<https://doi.org/10.3389/fendo.2018.00621>  
PMID:30386301
55. Yuan T, Rafizadeh S, Gorrepati KD, Lupse B, Oberholzer J, Maedler K, Ardestani A. Reciprocal regulation of mTOR complexes in pancreatic islets from humans with type 2 diabetes. *Diabetologia*. 2017; 60:668–78.  
<https://doi.org/10.1007/s00125-016-4188-9>  
PMID:28004151
56. Chinn IK, Blackburn CC, Manley NR, Sempowski GD. Changes in primary lymphoid organs with aging. *Semin Immunol*. 2012; 24:309–20.  
<https://doi.org/10.1016/j.smim.2012.04.005>  
PMID:22559987
57. Yang H, Youm YH, Vandanmagsar B, Rood J, Kumar KG, Butler AA, Dixit VD. Obesity accelerates thymic aging. *Blood*. 2009; 114:3803–12.  
<https://doi.org/10.1182/blood-2009-03-213595>  
PMID:19721009
58. Yang H, Youm YH, Dixit VD. Inhibition of thymic adipogenesis by caloric restriction is coupled with reduction in age-related thymic involution. *J Immunol*. 2009; 183:3040–52.  
<https://doi.org/10.4049/jimmunol.0900562>  
PMID:19648267
59. Hince M, Sakkal S, Vlahos K, Dudakov J, Boyd R, Chidgey A. The role of sex steroids and gonadectomy in the control of thymic involution. *Cell Immunol*. 2008; 252:122–38.  
<https://doi.org/10.1016/j.cellimm.2007.10.007>  
PMID:18294626
60. Ramsamy K, Subramaniyan R, Patra AK. An observational study of the association between androgenetic alopecia and size of the prostate. *Int J Trichology*. 2016; 8:62–66.  
<https://doi.org/10.4103/0974-7753.188034>  
PMID:27601858
61. Mannino DM, Thorn D, Swensen A, Holguin F. Prevalence and outcomes of diabetes, hypertension and cardiovascular disease in COPD. *Eur Respir J*. 2008; 32:962–69.  
<https://doi.org/10.1183/09031936.00012408>  
PMID:18579551
62. Davenport B, Eberlein J, Nguyen TT, Victorino F, Jhun K, Abuirqeba H, van der Heide V, Heeger P, Homann D. Aging boosts antiviral CD8+T cell memory through improved engagement of diversified recall response determinants. *PLoS Pathog*. 2019; 15:e1008144.  
<https://doi.org/10.1371/journal.ppat.1008144>  
PMID:31697793
63. Netea MG, Joosten LA, Latz E, Mills KH, Natoli G, Stunnenberg HG, O'Neill LA, Xavier RJ. Trained immunity: a program of innate immune memory in health and disease. *Science*. 2016; 352:aaf1098.  
<https://doi.org/10.1126/science.aaf1098>  
PMID:27102489
64. Pereira BI, Akbar AN. Convergence of innate and adaptive immunity during human aging. *Front Immunol*. 2016; 7:445.



- <https://doi.org/10.3389/fimmu.2016.00445>  
PMID:27867379
65. Nikolich-Zugich J. The twilight of immunity: emerging concepts in aging of the immune system. *Nat Immunol.* 2018; 19:10–19.  
<https://doi.org/10.1038/s41590-017-0006-x>  
PMID:29242543
  66. Smits SL, de Lang A, van den Brand JM, Leijten LM, van Ijcken WF, Eijkemans MJ, van Amerongen G, Kuiken T, Andeweg AC, Osterhaus AD, Haagmans BL. Exacerbated innate host response to SARS-CoV in aged non-human primates. *PLoS Pathog.* 2010; 6:e1000756.  
<https://doi.org/10.1371/journal.ppat.1000756>  
PMID:20140198
  67. Fulop T, Dupuis G, Baehl S, Le Page A, Bourgade K, Frost E, Witkowski JM, Pawelec G, Larbi A, Cunnane S. From inflamm-aging to immune-paralysis: a slippery slope during aging for immune-adaptation. *Biogerontology.* 2016; 17:147–57.  
<https://doi.org/10.1007/s10522-015-9615-7>  
PMID:26472173
  68. Montgomery RR, Shaw AC. Paradoxical changes in innate immunity in aging: recent progress and new directions. *J Leukoc Biol.* 2015; 98:937–43.  
<https://doi.org/10.1189/jlb.5MR0315-104R>  
PMID:26188078
  69. Rostamzadeh D, Yousefi M, Haghshenas MR, Ahmadi M, Dolati S, Babaloo Z. mTOR signaling pathway as a master regulator of memory CD8<sup>+</sup> t-cells, Th17, and NK cells development and their functional properties. *J Cell Physiol.* 2019; 234:12353–68.  
<https://doi.org/10.1002/jcp.28042>  
PMID:30710341
  70. Franceschi C, Bonafè M, Valensin S, Olivieri F, De Luca M, Ottaviani E, De Benedictis G. Inflamm-aging. An evolutionary perspective on immunosenescence. *Ann N Y Acad Sci.* 2000; 908:244–54.  
<https://doi.org/10.1111/j.1749-6632.2000.tb06651.x>  
PMID:10911963
  71. Fulop T, Larbi A, Dupuis G, Le Page A, Frost EH, Cohen AA, Witkowski JM, Franceschi C. Immunosenescence and inflamm-aging as two sides of the same coin: friends or foes? *Front Immunol.* 2018; 8:1960.  
<https://doi.org/10.3389/fimmu.2017.01960>  
PMID:29375577
  72. Franceschi C, Campisi J. Chronic inflammation (inflammaging) and its potential contribution to age-associated diseases. *J Gerontol A Biol Sci Med Sci.* 2014 (Suppl 1); 69:S4–9.  
<https://doi.org/10.1093/gerona/glu057>  
PMID:24833586
  73. Demidenko ZN, Blagosklonny MV. Growth stimulation leads to cellular senescence when the cell cycle is blocked. *Cell Cycle.* 2008; 7:3355–61.  
<https://doi.org/10.4161/cc.7.21.6919> PMID:18948731
  74. Blagosklonny MV. Rapamycin, proliferation and geroconversion to senescence. *Cell Cycle.* 2018; 17:2655–65.  
<https://doi.org/10.1080/15384101.2018.1554781>  
PMID:30541374
  75. Blagosklonny MV. Cell senescence and hypermitogenic arrest. *EMBO Rep.* 2003; 4:358–62.  
<https://doi.org/10.1038/sj.embor.embor806>  
PMID:12671679
  76. Demidenko ZN, Shtutman M, Blagosklonny MV. Pharmacologic inhibition of MEK and PI-3K converges on the mTOR/S6 pathway to decelerate cellular senescence. *Cell Cycle.* 2009; 8:1896–900.  
<https://doi.org/10.4161/cc.8.12.8809>  
PMID:19478560
  77. Leontieva OV, Demidenko ZN, Blagosklonny MV. MEK drives cyclin D1 hyper-elevation during geroconversion. *Cell Death Differ.* 2013; 20:1241–49.  
<https://doi.org/10.1038/cdd.2013.86>  
PMID:23852369
  78. Sousa-Victor P, García-Prat L, Muñoz-Cánoves P. Dual mTORC1/C2 inhibitors: gerosuppressors with potential anti-aging effect. *Oncotarget.* 2015; 6:23052–54.  
<https://doi.org/10.18632/oncotarget.5563>  
PMID:26375366
  79. Leontieva OV, Blagosklonny MV. Gerosuppression by pan-mTOR inhibitors. *Aging (Albany NY).* 2016; 8:3535–51.  
<https://doi.org/10.18632/aging.101155>  
PMID:28077803
  80. Walters HE, Deneka-Hannemann S, Cox LS. Reversal of phenotypes of cellular senescence by pan-mTOR inhibition. *Aging (Albany NY).* 2016; 8:231–44.  
<https://doi.org/10.18632/aging.100872>  
PMID:26851731
  81. Wang R, Yu Z, Sunchu B, Shoaf J, Dang I, Zhao S, Caples K, Bradley L, Beaver LM, Ho E, Löhr CV, Perez VI. Rapamycin inhibits the secretory phenotype of senescent cells by a Nrf2-independent mechanism. *Aging Cell.* 2017; 16:564–74.  
<https://doi.org/10.1111/acer.12587> PMID:28371119
  82. Gu Z, Tan W, Ji J, Feng G, Meng Y, Da Z, Guo G, Xia Y, Zhu X, Shi G, Cheng C. Rapamycin reverses the senescent phenotype and improves immunoregulation of mesenchymal stem cells from MRL/lpr mice and systemic lupus erythematosus patients through inhibition of the mTOR signaling pathway. *Aging (Albany NY).* 2016; 8:1102–14.  
<https://doi.org/10.18632/aging.100925>



PMID:[27048648](#)

83. Kochetkova EY, Blinova GI, Bystrova OA, Martynova MG, Pospelov VA, Pospelova TV. Targeted elimination of senescent ras-transformed cells by suppression of MEK/ERK pathway. *Aging (Albany NY)*. 2017; 9:2352–75.  
<https://doi.org/10.18632/aging.101325>  
PMID:[29140794](#)
84. Kolesnichenko M, Hong L, Liao R, Vogt PK, Sun P. Attenuation of TORC1 signaling delays replicative and oncogenic RAS-induced senescence. *Cell Cycle*. 2012; 11:2391–401.  
<https://doi.org/10.4161/cc.20683>  
PMID:[22627671](#)
85. Demidenko ZN, Korotchikina LG, Gudkov AV, Blagosklonny MV. Paradoxical suppression of cellular senescence by p53. *Proc Natl Acad Sci USA*. 2010; 107:9660–64.  
<https://doi.org/10.1073/pnas.1002298107>  
PMID:[20457898](#)
86. Leontieva OV, Demidenko ZN, Blagosklonny MV. Contact inhibition and high cell density deactivate the mammalian target of rapamycin pathway, thus suppressing the senescence program. *Proc Natl Acad Sci USA*. 2014; 111:8832–37.  
<https://doi.org/10.1073/pnas.1405723111>  
PMID:[24889617](#)
87. Horvath S, Lu AT, Cohen H, Raj K. Rapamycin retards epigenetic ageing of keratinocytes independently of its effects on replicative senescence, proliferation and differentiation. *Aging (Albany NY)*. 2019; 11:3238–49.  
<https://doi.org/10.18632/aging.101976>  
PMID:[31136303](#)
88. Cho S, Hwang ES. Status of mTOR activity may phenotypically differentiate senescence and quiescence. *Mol Cells*. 2012; 33:597–604.  
<https://doi.org/10.1007/s10059-012-0042-1>  
PMID:[22570149](#)
89. Blagosklonny MV. Does rapamycin slow down time? *Oncotarget*. 2018; 9:30210–12.  
<https://doi.org/10.18632/oncotarget.25788>  
PMID:[30100983](#)
90. Kennedy BK, Berger SL, Brunet A, Campisi J, Cuervo AM, Epel ES, Franceschi C, Lithgow GJ, Morimoto RI, Pessin JE, Rando TA, Richardson A, Schadt EE, et al. Geroscience: linking aging to chronic disease. *Cell*. 2014; 159:709–13.  
<https://doi.org/10.1016/j.cell.2014.10.039>  
PMID:[25417146](#)
91. Blagosklonny MV. Rejuvenating immunity: “anti-aging drug today” eight years later. *Oncotarget*. 2015; 6:19405–12.  
<https://doi.org/10.18632/oncotarget.3740>  
PMID:[25844603](#)
92. Chen C, Liu Y, Liu Y, Zheng P. mTOR regulation and therapeutic rejuvenation of aging hematopoietic stem cells. *Sci Signal*. 2009; 2:ra75.  
<https://doi.org/10.1126/scisignal.2000559>  
PMID:[19934433](#)
93. Jagannath C, Bakhru P. Rapamycin-induced enhancement of vaccine efficacy in mice. *Methods Mol Biol*. 2012; 821:295–303.  
[https://doi.org/10.1007/978-1-61779-430-8\\_18](https://doi.org/10.1007/978-1-61779-430-8_18)  
PMID:[22125073](#)
94. Bravo-San Pedro JM, Senovilla L. Immunostimulatory activity of lifespan-extending agents. *Aging (Albany NY)*. 2013; 5:793–801.  
<https://doi.org/10.18632/aging.100619>  
PMID:[24389041](#)
95. Araki K, Turner AP, Shaffer VO, Gangappa S, Keller SA, Bachmann MF, Larsen CP, Ahmed R. mTOR regulates memory CD8 t-cell differentiation. *Nature*. 2009; 460:108–12.  
<https://doi.org/10.1038/nature08155>  
PMID:[19543266](#)
96. Ferrer IR, Araki K, Ford ML. Paradoxical aspects of rapamycin immunobiology in transplantation. *Am J Transplant*. 2011; 11:654–59.  
<https://doi.org/10.1111/j.1600-6143.2011.03473.x>  
PMID:[21446969](#)
97. Turner AP, Shaffer VO, Araki K, Martens C, Turner PL, Gangappa S, Ford ML, Ahmed R, Kirk AD, Larsen CP. Sirolimus enhances the magnitude and quality of viral-specific CD8+ t-cell responses to vaccinia virus vaccination in rhesus macaques. *Am J Transplant*. 2011; 11:613–18.  
<https://doi.org/10.1111/j.1600-6143.2010.03407.x>  
PMID:[21342450](#)
98. Hurez V, Dao V, Liu A, Pandeswara S, Gelfond J, Sun L, Bergman M, Orihuela CJ, Galvan V, Padrón Á, Drerup J, Liu Y, Hasty P, et al. Chronic mTOR inhibition in mice with rapamycin alters T, B, myeloid, and innate lymphoid cells and gut flora and prolongs life of immune-deficient mice. *Aging Cell*. 2015; 14:945–56.  
<https://doi.org/10.1111/acer.12380> PMID:[26315673](#)
99. Mannick JB, Del Giudice G, Lattanzi M, Valiante NM, Praestgaard J, Huang B, Lonetto MA, Maecker HT, Kovarik J, Carson S, Glass DJ, Klickstein LB. mTOR inhibition improves immune function in the elderly. *Sci Transl Med*. 2014; 6:268ra179.  
<https://doi.org/10.1126/scitranslmed.3009892>  
PMID:[25540326](#)
100. Mannick JB, Morris M, Hockey HP, Roma G, Beibel M, Kulmatycki K, Watkins M, Shavlakadze T, Zhou W,

- Quinn D, Glass DJ, Klickstein LB. TORC1 inhibition enhances immune function and reduces infections in the elderly. *Sci Transl Med*. 2018; 10:eaq1564. <https://doi.org/10.1126/scitranslmed.aaq1564> PMID:29997249
101. Ferrer IR, Wagener ME, Robertson JM, Turner AP, Araki K, Ahmed R, Kirk AD, Larsen CP, Ford ML. Cutting edge: rapamycin augments pathogen-specific but not graft-reactive CD8<sup>+</sup> T cell responses. *J Immunol*. 2010; 185:2004–08. <https://doi.org/10.4049/jimmunol.1001176> PMID:20631309
  102. Frasca D, Blomberg BB, Paganelli R. Aging, obesity, and inflammatory age-related diseases. *Front Immunol*. 2017; 8:1745. <https://doi.org/10.3389/fimmu.2017.01745> PMID:29270179
  103. Ventura MT, Casciaro M, Gangemi S, Buquicchio R. Immunosenescence in aging: between immune cells depletion and cytokines up-regulation. *Clin Mol Allergy*. 2017; 15:21. <https://doi.org/10.1186/s12948-017-0077-0> PMID:29259496
  104. Gan B, DePinho RA. mTORC1 signaling governs hematopoietic stem cell quiescence. *Cell Cycle*. 2009; 8:1003–06. <https://doi.org/10.4161/cc.8.7.8045> PMID:19270523
  105. Blagosklonny MV. Aging, stem cells, and mammalian target of rapamycin: a prospect of pharmacologic rejuvenation of aging stem cells. *Rejuvenation Res*. 2008; 11:801–08. <https://doi.org/10.1089/rej.2008.0722> PMID:18729812
  106. Sousa-Victor P, Perdiguero E, Muñoz-Cánoves P. Geroconversion of aged muscle stem cells under regenerative pressure. *Cell Cycle*. 2014; 13:3183–90. <https://doi.org/10.4161/15384101.2014.965072> PMID:25485497
  107. Ho YH, Méndez-Ferrer S. Microenvironmental contributions to hematopoietic stem cell aging. *Haematologica*. 2020; 105:38–46. <https://doi.org/10.3324/haematol.2018.211334> PMID:31806690
  108. Chen J, Kang JG, Keyvanfar K, Young NS, Hwang PM. Long-term adaptation to hypoxia preserves hematopoietic stem cell function. *Exp Hematol*. 2016; 44:866–73.e4. <https://doi.org/10.1016/j.exphem.2016.04.010> PMID:27118043
  109. Takubo K, Goda N, Yamada W, Iriuchishima H, Ikeda E, Kubota Y, Shima H, Johnson RS, Hirao A, Suematsu M, Suda T. Regulation of the HIF-1 $\alpha$  level is essential for hematopoietic stem cells. *Cell Stem Cell*. 2010; 7:391–402. <https://doi.org/10.1016/j.stem.2010.06.020> PMID:20804974
  110. Leontieva OV, Natarajan V, Demidenko ZN, Burdelya LG, Gudkov AV, Blagosklonny MV. Hypoxia suppresses conversion from proliferative arrest to cellular senescence. *Proc Natl Acad Sci USA*. 2012; 109:13314–18. <https://doi.org/10.1073/pnas.1205690109> PMID:22847439
  111. Luo Y, Li L, Zou P, Wang J, Shao L, Zhou D, Liu L. Rapamycin enhances long-term hematopoietic reconstitution of ex vivo expanded mouse hematopoietic stem cells by inhibiting senescence. *Transplantation*. 2014; 97:20–29. <https://doi.org/10.1097/TP.0b013e3182a7fcf8> PMID:24092377
  112. Feng X, Lin Z, Sun W, Hollinger MK, Desierto MJ, Keyvanfar K, Malide D, Muranski P, Chen J, Young NS. Rapamycin is highly effective in murine models of immune-mediated bone marrow failure. *Haematologica*. 2017; 102:1691–703. <https://doi.org/10.3324/haematol.2017.163675> PMID:28729300
  113. Tremblay F, Marette A. Amino acid and insulin signaling via the mTOR/p70 S6 kinase pathway. A negative feedback mechanism leading to insulin resistance in skeletal muscle cells. *J Biol Chem*. 2001; 276:38052–60. <https://doi.org/10.1074/jbc.M106703200> PMID:11498541
  114. Manning BD. Balancing Akt with S6K: implications for both metabolic diseases and tumorigenesis. *J Cell Biol*. 2004; 167:399–403. <https://doi.org/10.1083/jcb.200408161> PMID:15533996
  115. Wullschleger S, Loewith R, Hall MN. TOR signaling in growth and metabolism. *Cell*. 2006; 124:471–84. <https://doi.org/10.1016/j.cell.2006.01.016> PMID:16469695
  116. Krebs M, Brunmair B, Brehm A, Artwohl M, Szendroedi J, Nowotny P, Roth E, Fürsinn C, Promintzer M, Anderwald C, Bischof M, Roden M. The mammalian target of rapamycin pathway regulates nutrient-sensitive glucose uptake in man. *Diabetes*. 2007; 56:1600–07. <https://doi.org/10.2337/db06-1016> PMID:17329620
  117. Leontieva OV, Demidenko ZN, Blagosklonny MV. Rapamycin reverses insulin resistance (IR) in high-glucose medium without causing IR in normoglycemic

- medium. *Cell Death Dis.* 2014; 5:e1214.  
<https://doi.org/10.1038/cddis.2014.178>  
PMID: [24810050](#)
118. Khamzina L, Veilleux A, Bergeron S, Marette A. Increased activation of the mammalian target of rapamycin pathway in liver and skeletal muscle of obese rats: possible involvement in obesity-linked insulin resistance. *Endocrinology.* 2005; 146:1473–81.  
<https://doi.org/10.1210/en.2004-0921>  
PMID: [15604215](#)
  119. Blagosklonny MV. Rapamycin for longevity: opinion article. *Aging (Albany NY).* 2019; 11:8048–67.  
<https://doi.org/10.18632/aging.102355>  
PMID: [31586989](#)
  120. Taylor R, Al-Mrabeh A, Zhyzhneuskaya S, Peters C, Barnes AC, Aribisala BS, Hollingsworth KG, Mathers JC, Sattar N, Lean ME. Remission of human type 2 diabetes requires decrease in liver and pancreas fat content but is dependent upon capacity for  $\beta$  cell recovery. *Cell Metab.* 2018; 28:547–56.e3.  
<https://doi.org/10.1016/j.cmet.2018.07.003>  
PMID: [30078554](#)
  121. Steven S, Taylor R. Restoring normoglycaemia by use of a very low calorie diet in long- and short-duration type 2 diabetes. *Diabet Med.* 2015; 32:1149–55.  
<https://doi.org/10.1111/dme.12722>  
PMID: [25683066](#)
  122. Steven S, Lim EL, Taylor R. Population response to information on reversibility of type 2 diabetes. *Diabet Med.* 2013; 30:e135–38.  
<https://doi.org/10.1111/dme.12116>  
PMID: [23320491](#)
  123. Nicoll R, Henein MY. Caloric restriction and its effect on blood pressure, heart rate variability and arterial stiffness and dilatation: a review of the evidence. *Int J Mol Sci.* 2018; 19:751.  
<https://doi.org/10.3390/ijms19030751>  
PMID: [29518898](#)
  124. Blagosklonny MV. Rapamycin and quasi-programmed aging: four years later. *Cell Cycle.* 2010; 9:1859–62.  
<https://doi.org/10.4161/cc.9.10.11872>  
PMID: [20436272](#)
  125. Johnson SC, Yanos ME, Kayser EB, Quintana A, Sangesland M, Castanza A, Uhde L, Hui J, Wall VZ, Gagnidze A, Oh K, Wasko BM, Ramos FJ, et al. mTOR inhibition alleviates mitochondrial disease in a mouse model of leigh syndrome. *Science.* 2013; 342:1524–28.  
<https://doi.org/10.1126/science.1244360>  
PMID: [24231806](#)
  126. Houssaini A, Breau M, Kebe K, Abid S, Marcos E, Lipskaia L, Rideau D, Parpaleix A, Huang J, Amsellem V, Vienney N, Validire P, Maitre B, et al. mTOR pathway activation drives lung cell senescence and emphysema. *JCI Insight.* 2018; 3:e93203.  
<https://doi.org/10.1172/jci.insight.93203>  
PMID: [29415880](#)
  127. Mitani A, Ito K, Vuppusetty C, Barnes PJ, Mercado N. Restoration of corticosteroid sensitivity in chronic obstructive pulmonary disease by inhibition of mammalian target of rapamycin. *Am J Respir Crit Care Med.* 2016; 193:143–53.  
<https://doi.org/10.1164/rccm.201503-0593OC>  
PMID: [26426522](#)
  128. McCormack FX, Inoue Y, Moss J, Singer LG, Strange C, Nakata K, Barker AF, Chapman JT, Brantly ML, Stocks JM, Brown KK, Lynch JP 3rd, Goldberg HJ, et al, National Institutes of Health Rare Lung Diseases Consortium, and MILES Trial Group. Efficacy and safety of sirolimus in lymphangioleiomyomatosis. *N Engl J Med.* 2011; 364:1595–606.  
<https://doi.org/10.1056/NEJMoa1100391>  
PMID: [21410393](#)
  129. Blagosklonny MV. Fasting and rapamycin: diabetes versus benevolent glucose intolerance. *Cell Death Dis.* 2019; 10:607.  
<https://doi.org/10.1038/s41419-019-1822-8>  
PMID: [31406105](#)
  130. Pavlakis M, Goldfarb-Rumyantzev AS. Diabetes after transplantation and sirolimus: what's the connection? *J Am Soc Nephrol.* 2008; 19:1255–56.  
<https://doi.org/10.1681/ASN.2008050474>  
PMID: [18579636](#)
  131. Veroux M, Tallarita T, Corona D, Sinagra N, Giaquinta A, Zerbo D, Guerrieri C, D'Assoro A, Cimino S, Veroux P. Conversion to sirolimus therapy in kidney transplant recipients with new onset diabetes mellitus after transplantation. *Clin Dev Immunol.* 2013; 2013:496974.  
<https://doi.org/10.1155/2013/496974>  
PMID: [23762090](#)
  132. Tanimura J, Nakagawa H, Tanaka T, Kikuchi A, Osada S, Tanaka Y, Tokuyama K, Takamura T. The clinical course and potential underlying mechanisms of everolimus-induced hyperglycemia. *Endocr J.* 2019; 66:615–20.  
<https://doi.org/10.1507/endocrj.EJ18-0542>  
PMID: [30982794](#)
  133. Zhou Y, Hou Y, Shen J, Huang Y, Martin W, Cheng F. Network-based drug repurposing for novel coronavirus 2019-nCoV/SARS-CoV-2. *Cell Discov.* 2020; 6:14.  
<https://doi.org/10.1038/s41421-020-0153-3>  
PMID: [32194980](#)

134. Omarjee L, Janin A, Perrot F, Laviolle B, Meilhac O, Mahe G. Targeting t-cell senescence and cytokine storm with rapamycin to prevent severe progression in COVID-19. *Clin Immunol*. 2020; 216:108464. <https://doi.org/10.1016/j.clim.2020.108464> PMID: [32405269](#)
135. Zheng Y, Li R, Liu S. Immunoregulation with mTOR inhibitors to prevent COVID-19 severity: a novel intervention strategy beyond vaccines and specific antiviral medicines. *J Med Virol*. 2020; 10:1002. <https://doi.org/10.1002/jmv.26009> PMID: [32410266](#)
136. Maiese K. The mechanistic target of rapamycin (mTOR): novel considerations as an antiviral treatment. *Curr Neurovasc Res*. 2020. [Epub ahead of print]. <https://doi.org/10.2174/1567202617666200425205122> PMID: [32334502](#)
137. Lehrer S. Inhaled biguanides and mTOR inhibition for influenza and coronavirus (review). *World Acad Sci J*. 2020; 2:1. <https://doi.org/10.3892/wasj.2020.42> PMID: [32313883](#)
138. Zou J, Zou P, Wang J, Li L, Wang Y, Zhou D, Liu L. Inhibition of p38 MAPK activity promotes ex vivo expansion of human cord blood hematopoietic stem cells. *Ann Hematol*. 2012; 91:813–23. <https://doi.org/10.1007/s00277-011-1397-7> PMID: [22258328](#)
139. Ranadheera C, Coombs KM, Kobasa D. Comprehending a killer: the Akt/mTOR signaling pathways are temporally high-jacked by the highly pathogenic 1918 influenza virus. *EBioMedicine*. 2018; 32:142–63. <https://doi.org/10.1016/j.ebiom.2018.05.027> PMID: [29866590](#)
140. Kindrachuk J, Ork B, Hart BJ, Mazur S, Holbrook MR, Frieman MB, Traynor D, Johnson RF, Dyll J, Kuhn JH, Olinger GG, Hensley LE, Jahrling PB. Antiviral potential of ERK/MAPK and PI3K/AKT/mTOR signaling modulation for middle east respiratory syndrome coronavirus infection as identified by temporal kinome analysis. *Antimicrob Agents Chemother*. 2015; 59:1088–99. <https://doi.org/10.1128/AAC.03659-14> PMID: [25487801](#)
141. Seminari E, Colaneri M, Sambo M, Gallazzi I, Di Matteo A, Roda S, Bruno R, and COVID19 IRCCS San Matteo Pavia Task Force. SARS cov-2 infection in a renal-transplanted patient: a case report. *Am J Transplant*. 2020. [Epub ahead of print]. <https://doi.org/10.1111/ajt.15902> PMID: [32243672](#)
142. Mehta P, McAuley DF, Brown M, Sanchez E, Tattersall RS, Manson JJ, and HLH Across Speciality Collaboration, UK. COVID-19: consider cytokine storm syndromes and immunosuppression. *Lancet*. 2020; 395:1033–34. [https://doi.org/10.1016/S0140-6736\(20\)30628-0](https://doi.org/10.1016/S0140-6736(20)30628-0) PMID: [32192578](#)
143. Coperchini F, Chiovato L, Croce L, Magri F, Rotondi M. The cytokine storm in COVID-19: an overview of the involvement of the chemokine/chemokine-receptor system. *Cytokine Growth Factor Rev*. 2020; 53:25-32. <https://doi.org/10.1016/j.cytogfr.2020.05.003> PMID: [32446778](#)
144. Rolt A, Nair A, Cox LS. Optimisation of a screening platform for determining IL-6 inflammatory signalling in the senescence-associated secretory phenotype (SASP). *Biogerontology*. 2019; 20:359–71. <https://doi.org/10.1007/s10522-019-09796-4> PMID: [30741380](#)
145. Chiang PH, Wang L, Bonham CA, Liang X, Fung JJ, Lu L, Qian S. Mechanistic insights into impaired dendritic cell function by rapamycin: inhibition of Jak2/Stat4 signaling pathway. *J Immunol*. 2004; 172:1355–63. <https://doi.org/10.4049/jimmunol.172.3.1355> PMID: [14734710](#)
146. Wang CH, Chung FT, Lin SM, Huang SY, Chou CL, Lee KY, Lin TY, Kuo HP. Adjuvant treatment with a mammalian target of rapamycin inhibitor, sirolimus, and steroids improves outcomes in patients with severe H1N1 pneumonia and acute respiratory failure. *Crit Care Med*. 2014; 42:313–21. <https://doi.org/10.1097/CCM.0b013e3182a2727d> PMID: [24105455](#)

## SUPPLEMENTARY MATERIALS

### Supplementary Figure

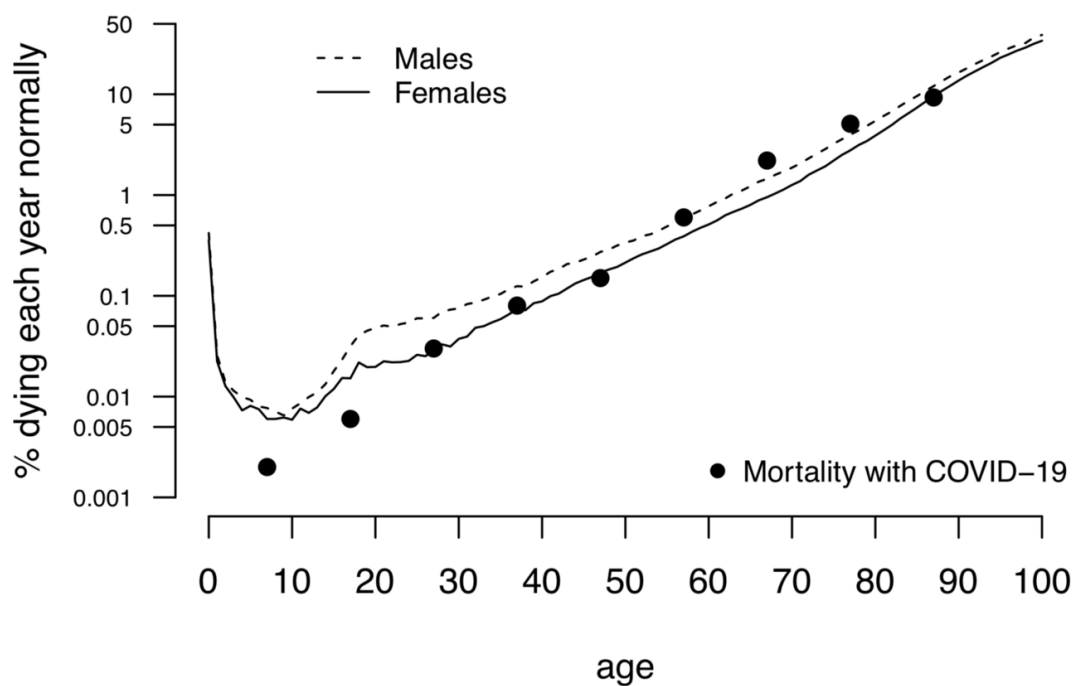

**Supplementary Figure 1. The mortality risk with COVID-19 superimposed on background annual risk.** Annual risk of death (hazard) for England and Wales, 2016–2018, from Office for National Statistics. <https://medium.com/wintoncentre/how-much-normal-risk-does-covid-represent-4539118e1196>.



## Rapamycin for longevity: opinion article

Mikhail V. Blagosklonny<sup>1</sup>

<sup>1</sup>Cell Stress Biology, Roswell Park Cancer Institute, Buffalo, NY 14263 USA

**Correspondence to:** Mikhail V. Blagosklonny; **email:** [blagosklonny@oncotarget.com](mailto:blagosklonny@oncotarget.com), [blagosklonny@rapalogs.com](mailto:blagosklonny@rapalogs.com)

**Keywords:** rapamycin, rapalogs, metformin, aging, anti-aging, fasting, lifespan, health span

**Received:** August 5, 2019

**Accepted:** October 3, 2019

**Published:** October 4, 2019

**Copyright:** Blagosklonny. This is an open-access article distributed under the terms of the Creative Commons Attribution License (CC BY 3.0), which permits unrestricted use, distribution, and reproduction in any medium, provided the original author and source are credited.

### ABSTRACT

From the dawn of civilization, humanity has dreamed of immortality. So why didn't the discovery of the anti-aging properties of mTOR inhibitors change the world forever? I will discuss several reasons, including fear of the actual and fictional side effects of rapamycin, everolimus and other clinically-approved drugs, arguing that no real side effects preclude their use as anti-aging drugs today. Furthermore, the alternative to the reversible (and avoidable) side effects of rapamycin/everolimus are the irreversible (and inevitable) effects of aging: cancer, stroke, infarction, blindness and premature death. I will also discuss why it is more dangerous not to use anti-aging drugs than to use them and how rapamycin-based drug combinations have already been implemented for potential life extension in humans. If you read this article from the very beginning to its end, you may realize that the time is now.

**"If you wait until you are ready, it is almost certainly too late."** Seth Godin

In one short-lived mutant strain of mice, the mTOR inhibitor rapamycin (known in the clinic as Sirolimus) extends maximum life span nearly three-fold [1]. Albeit less spectacularly, rapamycin also prolongs life in normal mice as well as in yeast, worms and flies, and it prevents age-related conditions in rodents, dogs, nonhuman primates and humans. Rapamycin and its analog, everolimus, are FDA approved for human use and have been used safely for decades. In 2006, it was suggested that rapamycin could be used immediately to slow down aging and all age-related diseases in humans [2], becoming an "anti-aging drug today" [3].

### But rapamycin was unlucky

Rapamycin known in the clinic as Rapamune or Sirolimus, was unlucky from the start, however. Twenty years ago, it was labeled an immunosuppressant and used to treat renal transplant patients. If rapamycin had

been labeled an immunomodulator and anti-inflammatory drug instead, it would sound much more appealing now. At anti-aging doses, rapamycin "eliminates hyperimmunity rather than suppresses immunity" or, more figuratively, it "rejuvenates immunity" [2]. This enables rapamycin and everolimus, a rapamycin analog, to act as immunostimulators [4-6], improving immunity in cancer patients [7] and the elderly [8, 9]. For example, rapamycin reduces the risk of CMV infection in organ transplant patients [10-12], improves antipathogen and anticancer immunity in mice [13-15], prolongs lifespan in infection-prone mice [16] and protects aged mice against pneumonia [17]. Rapamycin also inhibits viral replication [18, 19]. As a noteworthy example, rapamycin inhibits replication of the 1918 flu virus (the deadliest flu virus in history) by 100-fold [19], and also protects against lethal infection with influenza virus when administered during vaccination [13]. Still, as Dr. Allan Green advises, patients taking rapamycin should be carefully monitored for skin and subcutaneous bacterial infections, which should be treated with antibiotics <https://rapamycintherapy.com>.

Twenty years ago, it was thought that rapamycin might increase the risk of cancer (see a forthcoming review “Understanding the side effects of rapamycin”). Despite that concern, it was revealed that rapamycin actually prevents lymphoma and some types of cancer in transplant patients [20-27]. Currently, in fact, rapamycin analogs, everolimus and temsirolimus, are widely used in cancer therapy. Furthermore, rapamycin is the most effective known cancer-preventive agent in mice [25, 28-32] extending the lifespan of cancer-prone mice [33-36]. It has even been suggested that rapamycin extends lifespan by preventing cancer [37].

Nevertheless, social media often warn that although rapamycin prevents cancer, its use to prevent cancer may come at the cost of getting cancer. This self-contradiction miscites a twenty-year-old warning by the FDA for all drugs marketed as immunosuppressants (including rapamycin and everolimus): “Increased susceptibility to infection and the possible development of malignancies such as lymphoma and skin cancer may result from immunosuppression.” This statement does not say that rapamycin or everolimus cause malignancies. (Just read it again). Although rapamycin and its analogs are now approved by the FDA for treatment of cancer and lymphomas, the rumors that these drugs may cause cancer persist. To my knowledge, no study has shown that mTOR inhibitors cause cancer.

At this point, most scientists agree that rapamycin is not counterindicated because of concerns about immunosuppressive effects. But a new objection against rapamycin has emerged, namely that rapamycin may cause diabetes. As discussed in detail [38], the new wave of “fear of rapamycin” is groundless. So, what are the metabolic effects of rapamycin?

### **Metabolic effects of rapamycin and starvation**

When it is over-activated by nutrients and insulin, mTOR acts via S6K to inhibit insulin signaling, thereby causing insulin resistance [39-44]. Acute treatment with rapamycin abrogates insulin resistance in cells and animals including humans [45-51]. One study showed that chronic treatment with rapamycin may also prevent insulin resistance [52]. However, in some (but not all) rodent models, chronic treatment with rapamycin can also cause glucose intolerance and even insulin resistance [53-56]. This was interpreted as a deleterious side effect or even type 2 diabetes (T2D). Actually, however, these metabolic changes are features of benevolent starvation pseudo-diabetes (SPD), which was described 170 years ago in fasted animals and later in humans [57, 58]. During prolonged fasting, utilization of glucose by non-brain tissues must be

suppressed to ensure an adequate supply to the brain. When a fasted animal or human is then given a meal, glucose appears in the urine (glycosuria), which is a canonical symptom of diabetes. But this is because prolonged fasting (starvation) leads to decreased insulin secretion and to insulin resistance, and subsequent re-feeding then causes transient hyperglycemia and glycosuria. This SPD can be caused not only by prolonged fasting, but also by severe restriction of calorie and carbohydrate intake [38]. For example, severe calorie restriction can cause diabetes-like glucose intolerance [59]. Despite that, very low calorie diets are the most effective treatments for type 2 diabetes [60-62]. Some researchers re-discovered SPD in obese patients on strenuous weight loss program and erroneously warned that low calorie diets cause type 2 diabetes [63].

The obligatory symptom of starvation is ketosis, as ketones substitute for glucose as the main fuel for the brain. The ketogenic diet, a promising treatment for diabetes and obesity in humans, can cause symptoms of SPD in rodents (see for references [64]). Once again, some researchers warned that the ketogenic diet can favor type 2 diabetes [65]. As discussed, such warnings may not be justified [64, 66-68].

Rapamycin can be viewed as a partial starvation-mimetic [69-71]. It is therefore predictable that, under some conditions, prolonged treatment with rapamycin may lead to the emergence of SPD [72]. This has been confirmed in rapamycin-fed mice, which developed insulin resistance, glucose intolerance and mild hyperglycemia [54]. Nevertheless, rapamycin-fed mice lived longer and thus were healthier than mice fed a standard diet [54]. It is not completely clear why SPD was observed in only some studies and was not observed in other studies (see for references [38, 73]).

Importantly, SPD is reversible and does not lead to complications. Furthermore, rapamycin reduces the incidence of diabetic complications such as diabetic nephropathy in rodents [42, 74-85]. In healthy elderly humans, chronic treatment with rapamycin or everolimus did not cause hyperglycemia [8, 9, 86]. On the contrary, the risk of hyperglycemia was lower in the mTOR inhibitor treatment group than the placebo group [9].

In some cancer patients, high doses of rapamycin or everolimus can cause hyperglycemia, which is usually mild (grade 1-2) and reversible, and does not lead to treatment interruption [87-89]. Hyperglycemia is a common side effect of many oncotargeted drugs and is not a manifestation of diabetes. Everolimus, for

example, can cause hyperglycemia by decreasing insulin production [89].

To summarize, chronic treatment with high doses of rapamycin may cause symptoms of reversible SPD. Diet-induced SPD, at least, is beneficial and therapeutic. Rapamycin-induced SPD is a relatively rare side effect and probably can be avoided by administering the drug intermittently or at lower doses, and if SPD does occur, it can be reversed by discontinuation of the drug.

In some studies in transplant patients, rapamycin (sirolimus) and everolimus did not increase the risk of diabetes [90-95, 96]. In one study, no patient, out of 21 patients treated with rapamycin, developed diabetes, while the incidence of diabetes was 7% in patients treated with either cyclosporine or tacrolimus [96]. Most importantly, cyclosporine- or tacrolimus-induced diabetes resolved in 80% of patients after conversion from tacrolimus/cyclosporine to rapamycin (sirolimus) [96].

On the other hand, a large retrospective study reported an association between Medicare billing for diabetes treatment and rapamycin use, implying that rapamycin may increase the risk of diabetes [97]. However, this association was explained by the interaction between rapamycin and calcineurin inhibitors, which increase each other's levels [96, 98, 99]. Consequently, it remains unclear whether rapamycin per se increases the risk of diabetes in transplant patients [96]. Moreover, this is further complicated by the fact that most transplant patients develop type 2 diabetes spontaneously without rapamycin treatment [100].

### **Rapamycin is not much more dangerous than ordinary drugs**

If used properly, rapamycin is not much more dangerous than ordinary aspirin. Aspirin, one of the most widely used nonprescription medications, may cause numerous side effects, including life threatening gastric bleeding. The manufacturer lists as possible side effects: ringing in ears, confusion, hallucinations, seizure, severe nausea, vomiting, bloody stools, coughing up blood, fever and swelling. Still, millions of people take aspirin daily to prevent cardiovascular disease and cancer. It was calculated that the benefits of aspirin are greater than their risks [101, 102]. I believe the benefits of the anti-aging effects of rapamycin/everolimus may even be greater (Figure 1).

In the case of rapamycin and everolimus, the most worrying side effects have not been confirmed. At low doses [8, 9, 86], or when administered as a single high dose [103], no side effects have been detected so far in

the elderly. At high doses, rapamycin and everolimus slow cell proliferation, which decreases blood cell counts. As a result, mild and reversible thrombocytopenia (low platelet count), anemia and leukopenia are their most common side effects. But a mild reduction of platelets may be beneficial. In fact, one of the intended effects of aspirin is a decrease in platelet function.

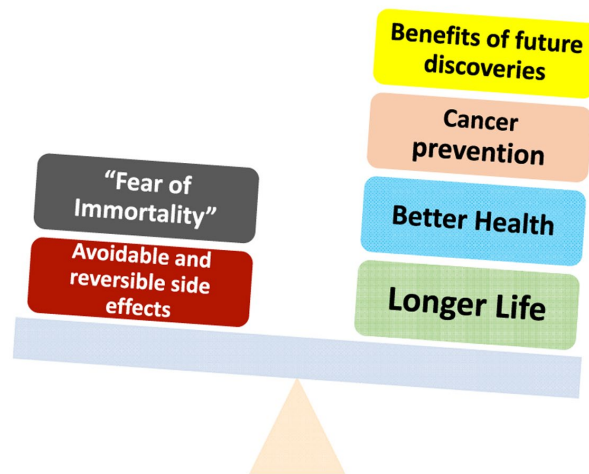

**Figure 1. Potential risk vs benefits of rapamycin-based anti-aging therapy.** Pros and Cons: Potential benefits of rapamycin may outweigh its risks.

There is one crucial reason why the side effects of rapamycin are exaggerated. The frequency of rapamycin side effects has often been estimated in studies lacking a placebo group. In cancer and transplant patients, numerous effects ascribed to rapamycin, such as fatigue (asthenia), for example, are often caused by the disease itself. In a placebo study of healthy volunteers, the placebo group reported more side effects such as fatigue than did the rapamycin group [104]. In recent placebo-controlled studies in healthy elderly people, no side effects were noticed as compared to placebo [9, 86].

While aspirin may cause gastric ulceration and bleeding, rapamycin may cause stomatitis and mycositis (ulceration of the mucous membranes of the mouth and the digestive tract) when used at high doses or chronically. A rare side effect of rapamycin is non-infectious interstitial pneumonitis [105]. And by inhibiting neutrophil function, rapamycin may increase the severity of bacterial infections [106]. These side effects require rapamycin's discontinuation. For antiaging purposes, however, rapamycin may be used either intermittently (e.g., once a week) or at low daily doses and can be discontinued if any unpleasant effects occur.

### From a single dose to intermittent schedules

Although nearly all drugs, including nonprescription drugs such as aspirin, can be fatal at sufficiently high doses, there are no known fatal cases of acute rapamycin (sirolimus) overdose [103]. For example, in a failed suicide attempt, an 18-year-old woman ingested 103 rapamycin tablets (103 mg), and the only detected effect was an elevation in total blood cholesterol [103]. In rats, rapamycin's LD50, a measure of drug lethality, could not be determined because it is higher than 2500 mg/kg. While a single dose of rapamycin is safe, it is sufficient to extend life and decrease obesity in several rodent models [1, 107]. Furthermore, transient treatment with rapamycin can be long lasting, extending the lifespan and preventing obesity long after drug discontinuation [107-112]. The magnitude of life extension by rapamycin depends mostly on reaching a high peak blood level [113]. A similar conclusion was reached by a study of rapamycin use in obesity [112]. It was suggested in 2008 that a pulse (intermittent) schedule of rapamycin administration would improve regeneration of stem cells [114] while avoiding mTORC2 inhibition [54, 115].

Therefore, to avoid side effects and maximize anti-aging effects [110], a feasible approach would be to prolong intervals between rapamycin administrations while keeping the total dose constant. For example, instead of daily administration, a weekly administration of a higher dose can be suggested to achieve a high peak blood level, followed by drug-free period to avoid undesirable effects. Still, everyday treatment of the elderly (1 mg/day for several weeks) was not associated with side effects and has been shown to be safe [86]. Similar results were achieved with low doses of other mTOR inhibitors [9]. Another option is an alternating schedule; for example, a 3- month course of weekly rapamycin alternating with a rapamycin-free month. Finally, anti-aging schedules can be very flexible to fit an individual patient. The optimal anti-aging dose is a personalized maximum dose that does not cause side effects in a particular patient (Figure 2).

In conclusion, the side effects of rapamycin are well-known and reversible. When used on an anti-aging schedule, side effects may be absent but, if not, they may be mitigated by combining rapamycin with other anti-aging drugs (metformin, statins) or by temporarily discontinuing it.

Noteworthy, the alternative to the reversible (and avoidable) side effects of rapamycin/everolimus are the irreversible (and inevitable) effects of aging. And by living longer, our generation will benefit from future anti-aging discoveries (Figure 1).

But the fear of nonexistent side effects is not the only reason the use of mTOR inhibitors for life extension has been questioned. The second reason is that there is rightful skepticism about any claims made about anti-aging drugs because thousands of anti-aging remedies have already failed. What then makes rapamycin different?

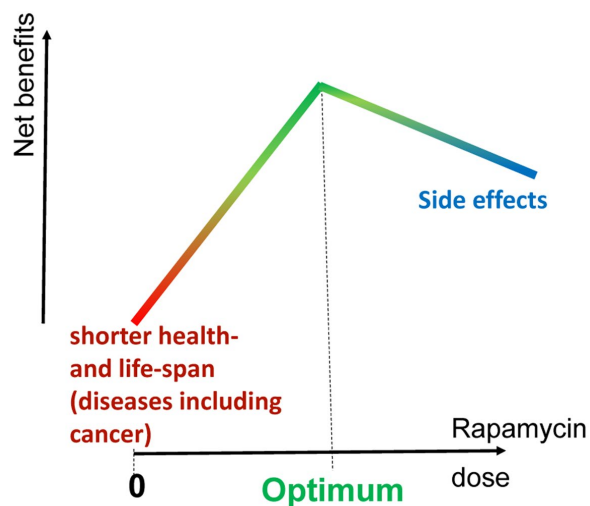

**Figure 2. Optimal dose of rapamycin for maximal net benefits.** Life extension by rapamycin is dose-dependent in rodents. The higher the dose, the higher the anti-aging benefits, including cancer prevention and life extension. In humans, side effects are dose-dependent and net benefits could potentially decrease at very high doses. This point of the highest net benefit is the optimal dose. The optimal dose varies in different individuals due to the variability of potential side effects. Thus, the optimal dose in a particular individual is determined by the emergence of side effects. The treatment can be viewed as life-long phase I/II clinical trial.

### The history of mankind: empty promises of immortality

On the one hand, from the dawn of civilization humans have dreamed of immortality. On the other hand, from the dawn of civilization a myriad of anti-aging remedies turned out to be empty promises. Even worse, they often shorten lifespan. Two notable examples are antioxidants and human growth hormone. The idea that free radicals, or reactive oxygen species (ROS), cause aging was based on a “wild guess,” as Harman, a father of the ROS theory, acknowledged when he titled his paper, “I thought, thought, thought for four months in vain and suddenly the idea came” [116]. The idea is simple and intuitive, and it was widely accepted based on circumstantial evidence. In fact, ROS are inevitable products of metabolism, and they do damage bio-



molecules. Moreover, excessive ROS can shorten lifespan. Similarly, the atomic bomb can shorten life span. Yet this does not mean that either atomic bombs or oxidants are the cause of normal aging as we know it.

Numerous experiments support the ROS theory. However, key experiments ruled the ROS theory out (see for references [2, 117-122]. To make a long story short, antioxidants could in theory prolong lifespan if mTOR-driven (quasi-programmed) aging were suppressed and we lived long enough to die from ROS-induced post-aging syndrome (I will discuss the nuances in the forthcoming article “ROS and aging revisited”). Indeed, ROS will kill any organism eventually. However, organisms normally die from mTOR-driven, age-related diseases (aging as we know it) before ROS can kill them (see for discussion [2]). As an analogy, consider most of the passengers on the Titanic. Would antioxidant treatment have been useful to them for life extension? The best way to extend life for members of that group would have been to carry more life boats. Only after their safe rescue could one expect antioxidants to potentially increase their life further. Similarly, only after rescue from the quasi-program of aging may antioxidants potentially have an impact.

Not surprisingly, antioxidants did not extend lifespan in any clinical trials and were detrimental in some [122-133]. As Ristow put it, they were “worse than useless” [119]. For example, in two very large randomized controlled trials, antioxidants increased the incidence of cancer, especially of lung cancer in smokers [131-133]. Antioxidants also increased all-cause mortality. The results were so disturbing that two trials were stopped earlier than planned [131-133]. Also disturbing is the finding that antioxidants accelerate cancer progression and promote metastasis [134-136]. But despite their uselessness, antioxidants continue to be a multibillion-dollar business. They are widely sold as natural products in the forms of nutritional supplements and in foods “rich in antioxidants.”

Another example is human growth hormone (HGH), which is widely used for rejuvenation and longevity. Yet, it actually accelerates aging and shortens lifespan [137, 138]. Growth hormone is a pro-aging hormone because it indirectly activates mTOR [139]. Notably, the hype around growth hormone is based on a single publication [140], which misinterpreted its acute effects [141].

Given that all previous anti-aging remedies have failed to meet expectations, it is not surprising that the discovery of the anti-aging effects of rapamycin are being met with skepticism too. But unlike HGH, the

effects of rapamycin are not based on one single paper as were HGH, nor is it based on a wild guess as were ROS.

### **Rapamycin is a proven anti-aging drug**

The evidence that rapamycin can function as an anti-aging drug is the product of thousands of scientists working independently all over the world, studying mTOR and its inhibitors for a variety of different reasons in diverse organisms, ranging from yeast to humans. Studies in model organisms, such as yeast, worms and flies, have revealed components of the TOR signaling pathway [142-145]. It was predicted in 2003[146] that conversion from quiescence to senescence (geroconversion) is driven by growth-promoting mediators, such as mTOR, when the cell cycle is blocked [147]. Figuratively, geroconversion is “twisted” growth that occurs when actual growth is completed [2], [147]. In cell culture, mTOR is maximally activated and geroconversion lasts 3-6 days, whereas in the human body it may take decades. mTOR drives geroconversion, rendering cells hypertrophic and hyperfunctional (e.g. senescence-associated secretory phenotype), which eventually leads to the development of age-related pathologies [2]. Working independently, clinical researchers have studied rapamycin for the prevention and treatment of nearly every age-related disease, including cancer, obesity, atherosclerosis and neurodegeneration. If a drug is indicated for all age-related diseases, it must be an anti-aging drug in that it targets a common driver of age-related diseases – that is, aging (see for references [2]). This is because aging is the sum of all age-related diseases, which limit lifespan [148-150]. Does rapamycin suppress aging and extend lifespan by preventing diseases, or does it prevent diseases by slowing aging? Actually, both reflect the same process.

By 2006, an extensive body of work from several independent fields all pointed to rapamycin as an anti-aging drug [2]. According to hyperfunction theory, aging is an unintended (not programmed but quasi-programmed) continuation of the developmental growth program, driven in part by mTOR [2, 120, 121, 151, 152]. Testable predictions have been formulated [2, 153] and confirmed in numerous independent studies (see for references: [150, 154]).

In two dozen studies using different strains of mice, rapamycin extended life span. Starting from a thorough study by Harrison et al. [155] and followed by nearly simultaneous studies by others [33, 108], the anti-aging effects of rapamycin have been confirmed many times (see for references: [113, 150, 156, 157]). Importantly, rapamycin and everolimus are indicated in most, if not



all, age-related diseases, from cancer to neurodegeneration [2, 158].

### **Conventional drugs as anti-aging agents**

Several conventional drugs used to treat age-related diseases (e.g., hypertension, ischemic heart disease, diabetes, cancer, prostate enlargement) can be viewed as somewhat anti-aging drugs [150, 154]. First, these drugs extend lifespan in the same model organisms (see for references: [159]). For example, metformin extends lifespan not only in mice, but also in the worms, which do not suffer from human diseases [160, 161]. ACE inhibitors prolong life not only in hypertensive rats, but also in healthy normotensive rats [162]. If these drugs were not ordinary drugs for human diseases, then gerontologists would call them anti-aging agents.

Second, these drugs prevent or treat more than one disease. For example, metformin is indicated to treat type 2 diabetes as well as pre-diabetes, obesity, metabolic syndrome, cancer, and polycystic ovary syndrome [163-168]. Aspirin not only reduces inflammation (a hallmark of aging), it also reduces the risk of cardiovascular disease, thrombosis and cancer. Low-dose aspirin prevents one-third of colorectal, gastric, and esophageal cancers [169]. PDE5 inhibitors such as Sildenafil and Tadalafil, which are widely used for erectile dysfunction, are also effective against benign prostatic hyperplasia (BPH) and pulmonary arterial hypertension in humans and suppress inflammation-driven colorectal cancer in mice [170]. Aging is the sum of all these age-related diseases. Given that humans and animals die from age-related diseases, life can be extended by treating multiple pre-diseases and diseases. Rapamycin and these drugs may complement each other in an anti-aging formulation by further extending life and/or by mitigating each others possible side effects [159]. For example, metformin may counteract rapamycin-induced hyperglycemia [171].

### **Not taking rapamycin may be as dangerous as smoking**

Strangely, the fear of tobacco smoking is less intense than the fear of rapamycin. But whereas smoking shortens both the healthspan and lifespan, rapamycin extends them. Smoking increases the incidence of cancer and other age-related diseases. Rapamycin prevents cancer in mice and humans. Heavy smoking shortens life expectancy by 6-10 years. In other words, simply *not* smoking prolongs life by 6-10 years. In middle-aged mice, just 3 months of high-dose rapamycin treatment was sufficient to increase life expectancy up to 60% [109]. When taken late in life,

rapamycin increases lifespan by 9-14% [155], despite the dosage being suboptimal [111]. This possibly equates to more than 7 years of human life. By comparison, smokers who quit late in life (at age 65 years), gain between 1.4 -3.7 years [172]. Considered in those terms, one could say that in the elderly, *not* taking rapamycin may be even more “dangerous” than smoking. Finally, rapamycin may be especially beneficial to smokers and former smokers. While the carcinogens from tobacco cause lung cancer in mice, rapamycin decreases tobacco-induced lung cancer multiplicity by 90% [28].

### **Diet and rapamycin**

Calorie restriction (CR) and intermittent fasting (IF) extend both the lifespan and healthspan in diverse species. However, CR is of little benefit when started in old age [73, 173-178]. Fasting inhibits the mTOR pathway in young but not old mice [179, 180]. By contrast, rapamycin strongly inhibits mTORC1 at any age. It extends lifespan, whether started late or early in life [108, 155, 181], even if used transiently [109]. So, whereas CR is more beneficial early in life, rapamycin may be indicated later in life. In addition, the beneficial effects of rapamycin and CR may be additive, given that they are exerted through overlapping but distinct mechanisms [182-186]. Intermittent rapamycin and CR (24-48 hours after) can be combined, to avoid potential hyperglycemia. Physical exercise may be most beneficial starting immediately after rapamycin use, to take advantage of rapamycin-induced lipolysis as a fuel for the muscles. By itself, chronic rapamycin treatment does not compromise muscle endurance [187] and even prevents muscle loss [188-190].

### **Do we need new or safer rapalogs to start aging prevention?**

Despite the metabolic side effects seen in some mouse models, mice treated with rapamycin live longer and are healthier. Humans also may want to live longer and healthier lives, regardless of whether one calls the means unsafe. Some basic researchers believe that rapamycin cannot be routinely used to treat aging in humans because of its metabolic effects and call for the development of safer analogs. First, rapamycin and everolimus are FDA-approved drugs, safe for human use. Since 1999, rapamycin has been used by millions of patients with no unexpected problems. One may suggest that rapamycin/everolimus are safe enough for very sick patients, not for healthy people.

First, healthy elderly people chronically treated with rapamycin or other mTOR inhibitors showed no ill effects (e.g. hyperglycemia) [8, 9, 86]. Logically, more

threatening adverse effects could be expected in cancer and transplant patients, who are often heavily pre-treated and terminally ill than in healthy people. Second, there are no truly healthy people among the elderly; otherwise, they would be “immortal”, given that all humans die from age-related diseases, not from healthy aging. And the sooner they would be treated with anti-aging drugs, the longer they would remain relatively healthy.

That said, it is, of course, important to develop new rapalogs, but not because current rapalogs are unsafe. It is important because such research will help us to learn more about mTOR and aging and may lead to the discovery of agents capable inhibiting the rapamycin-insensitive functions of mTORC1. These future drugs could potentially complement current rapalogs to further extend lifespan. Non-rapalog rapamycin analogs will also be developed [191]. The limitation of current rapalogs is not that they are unsafe but that their ability to extend life is limited. The goal should be to develop new drugs that extend life span further.

Rapamycin is a natural anti-fungal antibiotic produced by soil bacteria of Eastern Island. The patent on rapamycin has expired, and pharmacological companies have developed other rapalogs such as everolimus. (I use the term rapalogs to encompass both rapamycin, everolimus and any other analogs). At equipotent doses, rapamycin and everolimus exert almost identical therapeutic and adverse effects; although, everolimus is weaker and has a shorter half-life in the organism compared with rapamycin.

All current rapalogs exhibit the same side effects as rapamycin and everolimus. Their real side effects are mTORC1-dependent. Inhibition of mTORC1 decreases cell proliferation and function, which is manifested as lower blood cell counts and insulin levels, especially when rapalogs are chronically administered at high doses. We could develop weaker rapalogs, which would have no side effects if used at the same dose as rapamycin. But then why not just use a lower dose of rapamycin? (I will discuss elsewhere how safer rapalogs are probably weaker rapalogs.) Given to mice at the same doses as rapamycin, weaker analogs would have neither side effects and no therapeutic effects. Consequently, their metabolic effects would be diminished and so would their therapeutic effects. However, the same negative result can be achieved simply by decreasing the dose of rapamycin. While waiting for silver bullets, we need to use the currently available rapalogs, such as rapamycin and everolimus, to live longer. When “safer” rapalogs are clinically available, we may use them too.

## The time is now unless it's too late

The overwhelming evidence suggests that rapamycin is a universal anti-aging drug – that is, it extends lifespan in all tested models from yeast to mammals, suppresses cell senescence and delays the onset of age-related diseases, which are manifestations of aging [discussed by me in [148, 149, 158, 192]. Although rapamycin may reverse some manifestations of aging [181, 193], it is more effective at slowing down aging than reversing it. Therefore, rapamycin will be most effective when administered at the pre-disease, or even pre-pre-disease stages of age-related diseases [150]. For example, Carosi et al. suggested that mTOR inhibitors could be useful in Alzheimer disease, but only in the earliest stages [194, 195]. In addition, rapamycin and everolimus are more effective for preventing cancer than treating it. They may also be useful for treating osteoporosis, though not a broken hip after an osteoporotic fracture. Rapalogs may slow athero-sclerosis, thereby preventing myocardial infarction, but they are unlikely to help reverse an infarction. In other words, anti-aging drugs extend the healthspan (Figure 3) and are most effective before overt diseases cause organ damage and loss of function.

So, is it too late to take rapamycin once aging reaches an unhealthy stage? Actually, it is not too late. Even if one or a few age-related diseases renders aging unhealthy, other potential diseases are still at pre-disease stages, and anti-aging drugs may delay their development. And they may slow down further progression of existing overt diseases.

In addition to rapamycin/everolimus, the anti-aging formula metformin, aspirin, ACE inhibitors, angiotensin receptor blockers and PDE5 inhibitors, each of which can prevent or treat more than one age-related disease [159]. Note that I mention only clinically-approved drugs because they can be used now. Later, perhaps, we may be able to consider further life extension through the use of low doses of pan-mTOR [196, 197], mdm-2 [198, 199] and MEK inhibitors [200, 201], lithium [201, 202], as well as next-generation rapalogs.

There is currently no consensus around the short-term markers of anti-aging effects. Therefore, rapamycin trials should be focused on its potential side effects rather than anti-aging effects. We must be sure that the therapy is safe. In the future, the treatment should be conducted as a life-long phase I/II trial, with dose escalation of rapamycin/everolimus until the side effects are reached in an individual patient. The tailored optimal dose (see Figure 2) should be determined individually for each patient and may vary widely.

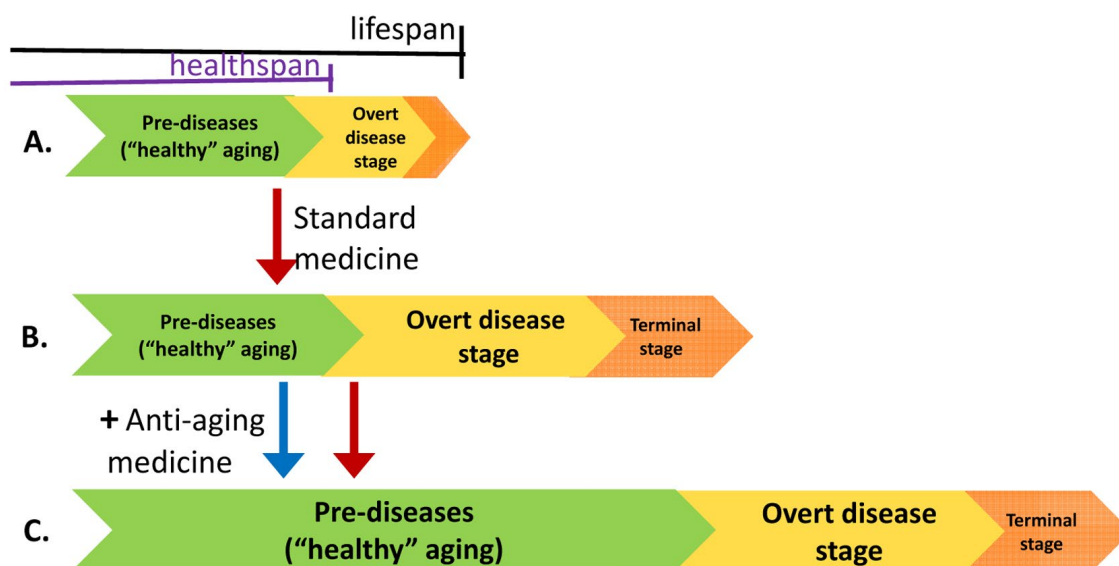

**Figure 3. Effects of standard and anti-aging medicine on health- and lifespan.** (A) The relationship between health- and lifespan. Aging is a sum of all age-related diseases, pre-diseases and pre-pre-diseases. Before overt age-related diseases become apparent, there is a seemingly healthy period of aging (so-called healthy aging). Starting from adulthood, pre-pre-diseases progress towards pre-diseases and then towards overt diseases. Unless treated with modern standard medical practice, the diseased stage is relatively brief. From (A) to (B) Standard medical treatment is usually started when overt diseases are diagnosed. Standard medicine extends life span mostly by preventing death from diseases, thus extending “unhealthy” phase of life, especially terminal stages of diseases, characterized by organ damage, failure and loss of functions. Standard medicine extends lifespan. From (B) to (C) Anti-aging medicine is most effective at the stage of pre-diseases and initial stages of diseases, characterized by increased functions before complications and organ damage occur. In terminal stages of deadly diseases, anti-aging therapy may not be useful. Thus, anti-aging medicine increases both health span and life span. Anti-aging medicine and standard medicine are additive when aging becomes unhealthy. The schema is simplified because, in reality, age-related diseases start at different ages (presbyopia vs sarcopenia), progress at different paces (atherosclerosis vs cancer), and most are not lethal, and some are well treated (cataract). Therefore, healthspan is an abstraction.

Doses and frequencies should be limited by the side effects: stomatitis/mucositis, anemia, thrombopenia, leukopenia, edema, and pneumonitis. To be safe, even mild hyperglycemia should be avoided or mitigated with metformin. Treatment is intended to be life-long, unless discontinued due to side effects.

Self-medication (even by physicians themselves) should be avoided and strongly discouraged. Instead, we need anti-aging clinics that implement the entire anti-aging recipe, including a complementary low carbohydrate diet and life style changes. Blood levels of rapamycin should be measured, as the rapamycin concentration in blood varies greatly among individuals taking the same dose. Doses of rapamycin should be tailored: personalized dosing and schedules. There is no shortage of potential patients who unfortunately already employ self-medication with rapamycin, but there is a shortage of physicians to treat them. Fortunately, a prototype clinic already functions in the USA, demonstrating that it is feasible from a regulatory standpoint (see Alan Green’s practice, Little Neck, NY). We cannot wait for

results from others if we want to live longer and healthier ourselves. The time is now.

### Disclaimer

This article is addressed to clinical scientists and physicians. It is intended for informational and educational purposes only. Medical doctors interested in this topic may e-mail the author at [Blagosklonny@rapalogs.com](mailto:Blagosklonny@rapalogs.com)

### CONFLICTS OF INTEREST

The author declares no conflicts of interest.

### REFERENCES

1. Johnson SC, Yanos ME, Kayser EB, Quintana A, Sangesland M, Castanza A, Uhde L, Hui J, Wall VZ, Gagnidze A, Oh K, Wasko BM, Ramos FJ, et al. mTOR inhibition alleviates mitochondrial disease in a mouse model of Leigh syndrome. *Science*. 2013; 342:1524–

28. <https://doi.org/10.1126/science.1244360>  
PMID:[24231806](https://pubmed.ncbi.nlm.nih.gov/24231806/)
2. Blagosklonny MV. Aging and immortality: quasi-programmed senescence and its pharmacologic inhibition. *Cell Cycle*. 2006; 5:2087–102.  
<https://doi.org/10.4161/cc.5.18.3288>  
PMID:[17012837](https://pubmed.ncbi.nlm.nih.gov/17012837/)
3. Blagosklonny MV. An anti-aging drug today: from senescence-promoting genes to anti-aging pill. *Drug Discov Today*. 2007; 12:218–24.  
<https://doi.org/10.1016/j.drudis.2007.01.004>  
PMID:[17331886](https://pubmed.ncbi.nlm.nih.gov/17331886/)
4. Dao V, Liu Y, Pandeswara S, Svatek RS, Gelfond JA, Liu A, Hurez V, Curiel TJ. Immune-Stimulatory Effects of Rapamycin Are Mediated by Stimulation of Antitumor  $\gamma\delta$  T Cells. *Cancer Res*. 2016; 76:5970–82.  
<https://doi.org/10.1158/0008-5472.CAN-16-0091>  
PMID:[27569211](https://pubmed.ncbi.nlm.nih.gov/27569211/)
5. Jung JW, Veitch M, Bridge JA, Overgaard NH, Cruz JL, Linedale R, Franklin ME, Saunders NA, Simpson F, Frazer IH, Steptoe RJ, Wells JW. Clinically-Relevant Rapamycin Treatment Regimens Enhance CD8<sup>+</sup> Effector Memory T Cell Function In The Skin and Allow their Infiltration into Cutaneous Squamous Cell Carcinoma. *Oncol Immunology*. 2018; 7:e1479627.  
<https://doi.org/10.1080/2162402X.2018.1479627>  
PMID:[30228949](https://pubmed.ncbi.nlm.nih.gov/30228949/)
6. Bravo-San Pedro JM, Senovilla L. Immunostimulatory activity of lifespan-extending agents. *Aging (Albany NY)*. 2013; 5:793–801.  
<https://doi.org/10.18632/aging.100619>  
PMID:[24389041](https://pubmed.ncbi.nlm.nih.gov/24389041/)
7. Svatek RS, Ji N, de Leon E, Mukherjee NZ, Kabra A, Hurez V, Nicolas M, Michalek JE, Javors M, Wheeler K, Sharp ZD, Livi CB, Shu ZJ, et al. Rapamycin Prevents Surgery-Induced Immune Dysfunction in Patients with Bladder Cancer. *Cancer Immunol Res*. 2019; 7:466–75.  
<https://doi.org/10.1158/2326-6066.CIR-18-0336>  
PMID:[30563829](https://pubmed.ncbi.nlm.nih.gov/30563829/)
8. Mannick JB, Del Giudice G, Lattanzi M, Valiante NM, Praestgaard J, Huang B, Lonetto MA, Maecker HT, Kovarik J, Carson S, Glass DJ, Klickstein LB. mTOR inhibition improves immune function in the elderly. *Sci Transl Med*. 2014; 6:268ra179.  
<https://doi.org/10.1126/scitranslmed.3009892>  
PMID:[25540326](https://pubmed.ncbi.nlm.nih.gov/25540326/)
9. Mannick JB, Morris M, Hockey HP, Roma G, Beibel M, Kulmatycki K, Watkins M, Shavlakadze T, Zhou W, Quinn D, Glass DJ, Klickstein LB. TORC1 inhibition enhances immune function and reduces infections in the elderly. *Sci Transl Med*. 2018; 10:eaq1564.  
<https://doi.org/10.1126/scitranslmed.aaq1564>  
PMID:[29997249](https://pubmed.ncbi.nlm.nih.gov/29997249/)
10. Demopoulos L, Polinsky M, Steele G, Mines D, Blum M, Caulfield M, Adamkovic A, Liu Q, Harler MB, Hahn C, Singh A. Reduced risk of cytomegalovirus infection in solid organ transplant recipients treated with sirolimus: a pooled analysis of clinical trials. *Transplant Proc*. 2008; 40:1407–10.  
<https://doi.org/10.1016/j.transproceed.2008.03.084>  
PMID:[18589118](https://pubmed.ncbi.nlm.nih.gov/18589118/)
11. Hill JA, Hummel M, Starling RC, Kobashigawa JA, Perrone SV, Arizón JM, Simonsen S, Abeywickrama KH, Bara C. A lower incidence of cytomegalovirus infection in de novo heart transplant recipients randomized to everolimus. *Transplantation*. 2007; 84:1436–42.  
<https://doi.org/10.1097/01.tp.0000290686.68910.bd>  
PMID:[18091519](https://pubmed.ncbi.nlm.nih.gov/18091519/)
12. Pascual J, Royuela A, Fernández AM, Herrero I, Delgado JF, Solé A, Guirado L, Serrano T, de la Torre-Cisneros J, Moreno A, Cordero E, Gallego R, Lumbreras C, Aguado JM, and Spanish Society of Transplantation Virological and Immune Response Investigation Study Group. Role of mTOR inhibitors for the control of viral infection in solid organ transplant recipients. *Transpl Infect Dis*. 2016; 18:819–31.  
<https://doi.org/10.1111/tid.12601>  
PMID:[27600985](https://pubmed.ncbi.nlm.nih.gov/27600985/)
13. Keating R, Hertz T, Wehenkel M, Harris TL, Edwards BA, McClaren JL, Brown SA, Surman S, Wilson ZS, Bradley P, Hurwitz J, Chi H, Doherty PC, et al. The kinase mTOR modulates the antibody response to provide cross-protective immunity to lethal infection with influenza virus. *Nat Immunol*. 2013; 14:1266–76.  
<https://doi.org/10.1038/ni.2741> PMID:[24141387](https://pubmed.ncbi.nlm.nih.gov/24141387/)
14. Diken M, Kreiter S, Vascotto F, Selmi A, Attig S, Diekmann J, Huber C, Türeci Ö, Sahin U. mTOR inhibition improves antitumor effects of vaccination with antigen-encoding RNA. *Cancer Immunol Res*. 2013; 1:386–92.  
<https://doi.org/10.1158/2326-6066.CIR-13-0046> PMID:[24778131](https://pubmed.ncbi.nlm.nih.gov/24778131/)
15. Ferrer IR, Wagener ME, Robertson JM, Turner AP, Araki K, Ahmed R, Kirk AD, Larsen CP, Ford ML. Cutting edge: rapamycin augments pathogen-specific but not graft-reactive CD8<sup>+</sup> T cell responses. *J Immunol*. 2010; 185:2004–08.  
<https://doi.org/10.4049/jimmunol.1001176>  
PMID:[20631309](https://pubmed.ncbi.nlm.nih.gov/20631309/)
16. Hurez V, Dao V, Liu A, Pandeswara S, Gelfond J, Sun L, Bergman M, Orihuela CJ, Galvan V, Padrón Á, Drerup J, Liu Y, Hasty P, et al. Chronic mTOR inhibition in mice with rapamycin alters T, B, myeloid, and innate lymphoid cells and gut flora and prolongs life of



- immune-deficient mice. *Aging Cell*. 2015; 14:945–56.  
<https://doi.org/10.1111/ace.12380> PMID:26315673
17. Hinojosa CA, Mgbemena V, Van Roekel S, Austad SN, Miller RA, Bose S, Orihuela CJ. Enteric-delivered rapamycin enhances resistance of aged mice to pneumococcal pneumonia through reduced cellular senescence. *Exp Gerontol*. 2012; 47:958–65.  
<https://doi.org/10.1016/j.exger.2012.08.013> PMID:22981852
  18. Kuss-Duerkop SK, Wang J, Mena I, White K, Metreveli G, Sakthivel R, Mata MA, Muñoz-Moreno R, Chen X, Krammer F, Diamond MS, Chen ZJ, García-Sastre A, Fontoura BM. Influenza virus differentially activates mTORC1 and mTORC2 signaling to maximize late stage replication. *PLoS Pathog*. 2017; 13:e1006635.  
<https://doi.org/10.1371/journal.ppat.1006635> PMID:28953980
  19. Ranadheera C, Coombs KM, Kobasa D. Comprehending a Killer: The Akt/mTOR Signaling Pathways Are Temporally High-Jacked by the Highly Pathogenic 1918 Influenza Virus. *EBioMedicine*. 2018; 32:142–63.  
<https://doi.org/10.1016/j.ebiom.2018.05.027> PMID:29866590
  20. Mathew T, Kreis H, Friend P. Two-year incidence of malignancy in sirolimus-treated renal transplant recipients: results from five multicenter studies. *Clin Transplant*. 2004; 18:446–49.  
<https://doi.org/10.1111/j.1399-0012.2004.00188.x> PMID:15233824
  21. Kauffman HM, Cherikh WS, Cheng Y, Hanto DW, Kahan BD. Maintenance immunosuppression with target-of-rapamycin inhibitors is associated with a reduced incidence of de novo malignancies. *Transplantation*. 2005; 80:883–89.  
<https://doi.org/10.1097/01.TP.0000184006.43152.8D> PMID:16249734
  22. Campistol JM, Eris J, Oberbauer R, Friend P, Hutchison B, Morales JM, Claesson K, Stallone G, Russ G, Rostaing L, Kreis H, Burke JT, Brault Y, et al. Sirolimus therapy after early cyclosporine withdrawal reduces the risk for cancer in adult renal transplantation. *J Am Soc Nephrol*. 2006; 17:581–89.  
<https://doi.org/10.1681/ASN.2005090993> PMID:16434506
  23. Euvrard S, Morelon E, Rostaing L, Goffin E, Brocard A, Tromme I, Broeders N, del Marmol V, Chatelet V, Domp Martin A, Kessler M, Serra AL, Hofbauer GF, et al, and TUMORAPA Study Group. Sirolimus and secondary skin-cancer prevention in kidney transplantation. *N Engl J Med*. 2012; 367:329–39.  
<https://doi.org/10.1056/NEJMoa1204166> PMID:22830463
  24. Dantal J, Morelon E, Rostaing L, Goffin E, Brocard A, Tromme I, Broeders N, Del Marmol V, Chatelet V, Domp Martin A, Kessler M, Serra A, Hofbauer GF, et al, and TUMORAPA Study Group. Sirolimus for Secondary Prevention of Skin Cancer in Kidney Transplant Recipients: 5-Year Results. *J Clin Oncol*. 2018; 36:2612–20.  
<https://doi.org/10.1200/JCO.2017.76.6691> PMID:30016177
  25. Patlolla JM, Kopelovich L, Qian L, Zhang Y, Kumar G, Madka V, Mohammed A, Biddick L, Sadeghi M, Lightfoot S, Rao CV. Early and delayed intervention with rapamycin prevents NNK-induced lung adenocarcinoma in A/J mice. *Oncol Rep*. 2015; 34:2925–34.  
<https://doi.org/10.3892/or.2015.4277> PMID:26397133
  26. Stallone G, Infante B, Prisciandaro C, Grandaliano G. mTOR and Aging: An Old Fashioned Dress. *Int J Mol Sci*. 2019; 20:E2774.  
<https://doi.org/10.3390/ijms20112774> PMID:31174250
  27. Blagosklonny MV. Prevention of cancer by inhibiting aging. *Cancer Biol Ther*. 2008; 7:1520–24.  
<https://doi.org/10.4161/cbt.7.10.6663> PMID:18769112
  28. Granville CA, Warfel N, Tsurutani J, Hollander MC, Robertson M, Fox SD, Veenstra TD, Issaq HJ, Linnoila RI, Dennis PA. Identification of a highly effective rapamycin schedule that markedly reduces the size, multiplicity, and phenotypic progression of tobacco carcinogen-induced murine lung tumors. *Clin Cancer Res*. 2007; 13:2281–89.  
<https://doi.org/10.1158/1078-0432.CCR-06-2570> PMID:17404113
  29. Kopelovich L, Fay JR, Sigman CC, Crowell JA. The mammalian target of rapamycin pathway as a potential target for cancer chemoprevention. *Cancer Epidemiol Biomarkers Prev*. 2007; 16:1330–40.  
<https://doi.org/10.1158/1055-9965.EPI-07-0045> PMID:17626998
  30. Mercier I, Camacho J, Titchen K, Gonzales DM, Quann K, Bryant KG, Molchansky A, Milliman JN, Whitaker-Menezes D, Sotgia F, Jasmin JF, Schwarting R, Pestell RG, et al. Caveolin-1 and accelerated host aging in the breast tumor microenvironment: chemoprevention with rapamycin, an mTOR inhibitor and anti-aging drug. *Am J Pathol*. 2012; 181:278–93.  
<https://doi.org/10.1016/j.ajpath.2012.03.017> PMID:22698676
  31. Kawabata S, Mercado-Matos JR, Hollander MC, Donahue D, Wilson W 3rd, Regales L, Butaney M, Pao W, Wong KK, Jänne PA, Dennis PA. Rapamycin prevents the development and progression of mutant



- epidermal growth factor receptor lung tumors with the acquired resistance mutation T790M. *Cell Rep*. 2014; 7:1824–32.  
<https://doi.org/10.1016/j.celrep.2014.05.039>  
PMID:24931608
32. Blagosklonny MV. Immunosuppressants in cancer prevention and therapy. *Oncol Immunology*. 2013; 2:e26961. <https://doi.org/10.4161/onci.26961>  
PMID:24575379
  33. Anisimov VN, Zabezhinski MA, Popovich IG, Piskunova TS, Semenchenko AV, Tyndyk ML, Yurova MN, Antoch MP, Blagosklonny MV. Rapamycin extends maximal lifespan in cancer-prone mice. *Am J Pathol*. 2010; 176:2092–97.  
<https://doi.org/10.2353/ajpath.2010.091050>  
PMID:20363920
  34. Komarova EA, Antoch MP, Novototskaya LR, Chernova OB, Paszkiewicz G, Leontieva OV, Blagosklonny MV, Gudkov AV. Rapamycin extends lifespan and delays tumorigenesis in heterozygous p53<sup>+/−</sup> mice. *Aging (Albany NY)*. 2012; 4:709–14.  
<https://doi.org/10.18632/aging.100498>  
PMID:23123616
  35. Hasty P, Livi CB, Dodds SG, Jones D, Strong R, Javors M, Fischer KE, Sloane L, Murthy K, Hubbard G, Sun L, Hurez V, Curiel TJ, Sharp ZD. eRapa restores a normal life span in a FAP mouse model. *Cancer Prev Res (Phila)*. 2014; 7:169–78.  
<https://doi.org/10.1158/1940-6207.CAPR-13-0299>  
PMID:24282255
  36. Livi CB, Hardman RL, Christy BA, Dodds SG, Jones D, Williams C, Strong R, Bokov A, Javors MA, Ikeno Y, Hubbard G, Hasty P, Sharp ZD. Rapamycin extends life span of Rb1<sup>+/−</sup> mice by inhibiting neuroendocrine tumors. *Aging (Albany NY)*. 2013; 5:100–10.  
<https://doi.org/10.18632/aging.100533>  
PMID:23454836
  37. Ehninger D, Neff F, Xie K. Longevity, aging and rapamycin. *Cell Mol Life Sci*. 2014; 71:4325–46.  
<https://doi.org/10.1007/s00018-014-1677-1>  
PMID:25015322
  38. Blagosklonny MV. Fasting and rapamycin: diabetes versus benevolent glucose intolerance. *Cell Death Dis*. 2019; 10:607. <https://doi.org/10.1038/s41419-019-1822-8> PMID:31406105
  39. Manning BD. Balancing Akt with S6K: implications for both metabolic diseases and tumorigenesis. *J Cell Biol*. 2004; 167:399–403.  
<https://doi.org/10.1083/jcb.200408161>  
PMID:15533996
  40. Um SH, D'Alessio D, Thomas G. Nutrient overload, insulin resistance, and ribosomal protein S6 kinase 1, S6K1. *Cell Metab*. 2006; 3:393–402.  
<https://doi.org/10.1016/j.cmet.2006.05.003>  
PMID:16753575
  41. Wullschlegel S, Loewith R, Hall MN. TOR signaling in growth and metabolism. *Cell*. 2006; 124:471–84.  
<https://doi.org/10.1016/j.cell.2006.01.016>  
PMID:16469695
  42. Inoki K, Mori H, Wang J, Suzuki T, Hong S, Yoshida S, Blattner SM, Ikenoue T, Rüegg MA, Hall MN, Kwiatkowski DJ, Rastaldi MP, Huber TB, et al. mTORC1 activation in podocytes is a critical step in the development of diabetic nephropathy in mice. *J Clin Invest*. 2011; 121:2181–96.  
<https://doi.org/10.1172/JCI44771> PMID:21606597
  43. Zoncu R, Efeyan A, Sabatini DM. mTOR: from growth signal integration to cancer, diabetes and ageing. *Nat Rev Mol Cell Biol*. 2011; 12:21–35.  
<https://doi.org/10.1038/nrm3025> PMID:21157483
  44. Cornu M, Albert V, Hall MN. mTOR in aging, metabolism, and cancer. *Curr Opin Genet Dev*. 2013; 23:53–62. <https://doi.org/10.1016/j.gde.2012.12.005>  
PMID:23317514
  45. Krebs M, Brunmair B, Brehm A, Artwohl M, Szendroedi J, Nowotny P, Roth E, Fürsinn C, Promintzer M, Anderwald C, Bischof M, Roden M. The Mammalian target of rapamycin pathway regulates nutrient-sensitive glucose uptake in man. *Diabetes*. 2007; 56:1600–07. <https://doi.org/10.2337/db06-1016> PMID:17329620
  46. Tremblay F, Krebs M, Dombrowski L, Brehm A, Bernroider E, Roth E, Nowotny P, Waldhäusl W, Marette A, Roden M. Overactivation of S6 kinase 1 as a cause of human insulin resistance during increased amino acid availability. *Diabetes*. 2005; 54:2674–84.  
<https://doi.org/10.2337/diabetes.54.9.2674>  
PMID:16123357
  47. Zhou W, Ye S. Rapamycin improves insulin resistance and hepatic steatosis in type 2 diabetes rats through activation of autophagy. *Cell Biol Int*. 2018; 42:1282–91.  
<https://doi.org/10.1002/cbin.11015>  
PMID:29908010
  48. Ueno M, Carvalheira JB, Tambascia RC, Bezerra RM, Amaral ME, Carneiro EM, Folli F, Franchini KG, Saad MJ. Regulation of insulin signalling by hyperinsulinaemia: role of IRS-1/2 serine phosphorylation and the mTOR/p70 S6K pathway. *Diabetologia*. 2005; 48:506–18.  
<https://doi.org/10.1007/s00125-004-1662-6>  
PMID:15692808
  49. Reifsnyder PC, Flurkey K, Te A, Harrison DE. Rapamy-

- cin treatment benefits glucose metabolism in mouse models of type 2 diabetes. *Aging* (Albany NY). 2016; 8:3120–30. <https://doi.org/10.18632/aging.101117> PMID:[27922820](#)
50. He S, Zhang Y, Wang D, Tao K, Zhang S, Wei L, Chen Q. Rapamycin/GABA combination treatment ameliorates diabetes in NOD mice. *Mol Immunol*. 2016; 73:130–37. <https://doi.org/10.1016/j.molimm.2016.01.008> PMID:[27082922](#)
  51. Leontieva OV, Demidenko ZN, Blagosklonny MV. Rapamycin reverses insulin resistance (IR) in high-glucose medium without causing IR in normoglycemic medium. *Cell Death Dis*. 2014; 5:e1214. <https://doi.org/10.1038/cddis.2014.178> PMID:[24810050](#)
  52. Makki K, Taront S, Molendi-Coste O, Bouchaert E, Neve B, Eury E, Lobbens S, Labalette M, Duez H, Staels B, Dombrowicz D, Froguel P, Wolowczuk I. Beneficial metabolic effects of rapamycin are associated with enhanced regulatory cells in diet-induced obese mice. *PLoS One*. 2014; 9:e92684. <https://doi.org/10.1371/journal.pone.0092684> PMID:[24710396](#)
  53. Yang SB, Lee HY, Young DM, Tien AC, Rowson-Baldwin A, Shu YY, Jan YN, Jan LY. Rapamycin induces glucose intolerance in mice by reducing islet mass, insulin content, and insulin sensitivity. *J Mol Med (Berl)*. 2012; 90:575–85. <https://doi.org/10.1007/s00109-011-0834-3> PMID:[22105852](#)
  54. Lamming DW, Ye L, Katajisto P, Goncalves MD, Saitoh M, Stevens DM, Davis JG, Salmon AB, Richardson A, Ahima RS, Guertin DA, Sabatini DM, Baur JA. Rapamycin-induced insulin resistance is mediated by mTORC2 loss and uncoupled from longevity. *Science*. 2012; 335:1638–43. <https://doi.org/10.1126/science.1215135> PMID:[22461615](#)
  55. Houde VP, Brûlé S, Festuccia WT, Blanchard PG, Bellmann K, Deshaies Y, Marette A. Chronic rapamycin treatment causes glucose intolerance and hyperlipidemia by upregulating hepatic gluconeogenesis and impairing lipid deposition in adipose tissue. *Diabetes*. 2010; 59:1338–48. <https://doi.org/10.2337/db09-1324> PMID:[20299475](#)
  56. Deblon N, Bourgoin L, Veyrat-Durebex C, Peyrou M, Vinciguerra M, Caillon A, Maeder C, Fournier M, Montet X, Rohner-Jeanrenaud F, Foti M. Chronic mTOR inhibition by rapamycin induces muscle insulin resistance despite weight loss in rats. *Br J Pharmacol*. 2012; 165:2325–40. <https://doi.org/10.1111/j.1476-5381.2011.01716.x> PMID:[22014210](#)
  57. Lundbaek K. Metabolic abnormalities in starvation diabetes. *Yale J Biol Med*. 1948; 20:533–44. PMID:[18872320](#)
  58. Peters JP. Starvation Diabetes, The Reason for the Use of Glucose in the Treatment of Diabetic Acidosis. *Yale J Biol Med*. 1945; 17:705–26. PMID:[21434236](#)
  59. Fontana L, Klein S, Holloszy JO. Effects of long-term calorie restriction and endurance exercise on glucose tolerance, insulin action, and adipokine production. *Age (Dordr)*. 2010; 32:97–108. <https://doi.org/10.1007/s11357-009-9118-z> PMID:[19904628](#)
  60. Steven S, Lim EL, Taylor R. Population response to information on reversibility of Type 2 diabetes. *Diabet Med*. 2013; 30:e135–38. <https://doi.org/10.1111/dme.12116> PMID:[23320491](#)
  61. Steven S, Taylor R. Restoring normoglycaemia by use of a very low calorie diet in long- and short-duration Type 2 diabetes. *Diabet Med*. 2015; 32:1149–55. <https://doi.org/10.1111/dme.12722> PMID:[25683066](#)
  62. Taylor R, Al-Mrabeh A, Zhyzhneuskaya S, Peters C, Barnes AC, Aribisala BS, Hollingsworth KG, Mathers JC, Sattar N, Lean ME. Remission of Human Type 2 Diabetes Requires Decrease in Liver and Pancreas Fat Content but Is Dependent upon Capacity for  $\beta$  Cell Recovery. *Cell Metab*. 2018; 28:547–556.e3. <https://doi.org/10.1016/j.cmet.2018.07.003> PMID:[30078554](#)
  63. Koffler M, Kisch ES. Starvation diet and very-low-calorie diets may induce insulin resistance and overt diabetes mellitus. *J Diabetes Complications*. 1996; 10:109–12. [https://doi.org/10.1016/1056-8727\(94\)00077-8](https://doi.org/10.1016/1056-8727(94)00077-8) PMID:[8777329](#)
  64. Blagosklonny MV. The mystery of the ketogenic diet: benevolent pseudo-diabetes. *Cell Cycle*. 2019; 18:2157–63. <https://doi.org/10.1080/15384101.2019.1644765> PMID:[31368400](#)
  65. Lamont BJ, Waters MF, Andrikopoulos S. A low-carbohydrate high-fat diet increases weight gain and does not improve glucose tolerance, insulin secretion or  $\beta$ -cell mass in NZO mice. *Nutr Diabetes*. 2016; 6:e194. <https://doi.org/10.1038/nutd.2016.2> PMID:[26878317](#)
  66. Schofield G, Henderson G, Crofts C, Thornley S. What are we to think when results from mouse research contradict those from human experiments and clinical practice? *Nutr Diabetes*. 2016; 6:e224. <https://doi.org/10.1038/nutd.2016.31> PMID:[27525819](#)
  67. Caminhotto RO, Lima FB. Low carbohydrate high fat diets: when models do not match reality. *Arch Endo-*

crinol Metab. 2016; 60:405–06.

<https://doi.org/10.1590/2359-3997000000177>

PMID:27533617

68. Menendez JA, Cuyàs E, Folguera-Blasco N, Verdura S, Martín-Castillo B, Joven J, Alarcón T. *In silico* clinical trials for anti-aging therapies. *Aging (Albany NY)*. 2019; 11:6591–601.  
<https://doi.org/10.18632/aging.102180>  
PMID:31444969
69. Longo VD, Fontana L. Intermittent supplementation with rapamycin as a dietary restriction mimetic. *Aging (Albany NY)*. 2011; 3:1039–40.  
<https://doi.org/10.18632/aging.100401>  
PMID:22147496
70. Mercken EM, Carboneau BA, Krzysik-Walker SM, de Cabo R. Of mice and men: the benefits of caloric restriction, exercise, and mimetics. *Ageing Res Rev*. 2012; 11:390–98.  
<https://doi.org/10.1016/j.arr.2011.11.005>  
PMID:22210414
71. Roth GS, Ingram DK. Manipulation of health span and function by dietary caloric restriction mimetics. *Ann N Y Acad Sci*. 2016; 1363:5–10.  
<https://doi.org/10.1111/nyas.12834> PMID:26214681
72. Blagosklonny MV. Rapamycin-induced glucose intolerance: hunger or starvation diabetes. *Cell Cycle*. 2011; 10:4217–24.  
<https://doi.org/10.4161/cc.10.24.18595>  
PMID:22157190
73. Carter CS, Khamiss D, Matheny M, Toklu HZ, Kirichenko N, Strehler KY, Tümer N, Scarpace PJ, Morgan D. Rapamycin Versus Intermittent Feeding: Dissociable Effects on Physiological and Behavioral Outcomes When Initiated Early and Late in Life. *J Gerontol A Biol Sci Med Sci*. 2016; 71:866–75.  
<https://doi.org/10.1093/gerona/glu238>  
PMID:25617380
74. Gödel M, Hartleben B, Herbach N, Liu S, Zschiedrich S, Lu S, Debreczeni-Mór A, Lindenmeyer MT, Rastaldi MP, Hartleben G, Wiech T, Fornoni A, Nelson RG, et al. Role of mTOR in podocyte function and diabetic nephropathy in humans and mice. *J Clin Invest*. 2011; 121:2197–209. <https://doi.org/10.1172/JCI44774>  
PMID:21606591
75. Nagai K, Matsubara T, Mima A, Sumi E, Kanamori H, Iehara N, Fukatsu A, Yanagita M, Nakano T, Ishimoto Y, Kita T, Doi T, Arai H. Gas6 induces Akt/mTOR-mediated mesangial hypertrophy in diabetic nephropathy. *Kidney Int*. 2005; 68:552–61.  
<https://doi.org/10.1111/j.1523-1755.2005.00433.x>  
PMID:16014032
76. Sataranatarajan K, Mariappan MM, Lee MJ, Feliars D, Choudhury GG, Barnes JL, Kasinath BS. Regulation of elongation phase of mRNA translation in diabetic nephropathy: amelioration by rapamycin. *Am J Pathol*. 2007; 171:1733–42.  
<https://doi.org/10.2353/ajpath.2007.070412>  
PMID:17991718
77. Wittmann S, Daniel C, Stief A, Vogelbacher R, Amann K, Hugo C. Long-term treatment of sirolimus but not cyclosporine ameliorates diabetic nephropathy in the rat. *Transplantation*. 2009; 87:1290–99.  
<https://doi.org/10.1097/TP.0b013e3181a192bd>  
PMID:19424027
78. Lloberas N, Cruzado JM, Franquesa M, Herrero-Fresneda I, Torras J, Alperovich G, Rama I, Vidal A, Grinyó JM. Mammalian target of rapamycin pathway blockade slows progression of diabetic kidney disease in rats. *J Am Soc Nephrol*. 2006; 17:1395–404.  
<https://doi.org/10.1681/ASN.2005050549>  
PMID:16597691
79. Yang Y, Wang J, Qin L, Shou Z, Zhao J, Wang H, Chen Y, Chen J. Rapamycin prevents early steps of the development of diabetic nephropathy in rats. *Am J Nephrol*. 2007; 27:495–502.  
<https://doi.org/10.1159/000106782> PMID:17671379
80. Sakaguchi M, Isono M, Isshiki K, Sugimoto T, Koya D, Kashiwagi A. Inhibition of mTOR signaling with rapamycin attenuates renal hypertrophy in the early diabetic mice. *Biochem Biophys Res Commun*. 2006; 340:296–301.  
<https://doi.org/10.1016/j.bbrc.2005.12.012>  
PMID:16364254
81. Mori H, Inoki K, Masutani K, Wakabayashi Y, Komai K, Nakagawa R, Guan KL, Yoshimura A. The mTOR pathway is highly activated in diabetic nephropathy and rapamycin has a strong therapeutic potential. *Biochem Biophys Res Commun*. 2009; 384:471–75.  
<https://doi.org/10.1016/j.bbrc.2009.04.136>  
PMID:19422788
82. Flaquer M, Lloberas N, Franquesa M, Torras J, Vidal A, Rosa JL, Herrero-Fresneda I, Grinyó JM, Cruzado JM. The combination of sirolimus and rosiglitazone produces a renoprotective effect on diabetic kidney disease in rats. *Life Sci*. 2010; 87:147–53.  
<https://doi.org/10.1016/j.lfs.2010.06.004>  
PMID:20600147
83. Reifsnyder PC, Doty R, Harrison DE. Rapamycin ameliorates nephropathy despite elevating hyperglycemia in a polygenic mouse model of type 2 diabetes, NONcNZO10/LtJ. *PLoS One*. 2014; 9:e114324.  
<https://doi.org/10.1371/journal.pone.0114324>  
PMID:25473963

84. Lu MK, Gong XG, Guan KL. mTOR in podocyte function: is rapamycin good for diabetic nephropathy? *Cell Cycle*. 2011; 10:3415–16.  
<https://doi.org/10.4161/cc.10.20.17686>  
PMID:22067710
85. Wahl PR, Serra AL, Le Hir M, Molle KD, Hall MN, Wüthrich RP. Inhibition of mTOR with sirolimus slows disease progression in Han:SPRD rats with autosomal dominant polycystic kidney disease (ADPKD). *Nephrol Dial Transplant*. 2006; 21:598–604.  
<https://doi.org/10.1093/ndt/gfi181> PMID:16221708
86. Kraig E, Linehan LA, Liang H, Romo TQ, Liu Q, Wu Y, Benavides AD, Curiel TJ, Javors MA, Musi N, Chiodo L, Koek W, Gelfond JA, Kellogg DL Jr. A randomized control trial to establish the feasibility and safety of rapamycin treatment in an older human cohort: Immunological, physical performance, and cognitive effects. *Exp Gerontol*. 2018; 105:53–69.  
<https://doi.org/10.1016/j.exger.2017.12.026>  
PMID:29408453
87. Xu KY, Shameem R, Wu S. Risk of hyperglycemia attributable to everolimus in cancer patients: A meta-analysis. *Acta Oncol*. 2016; 55:1196–203.  
<https://doi.org/10.3109/0284186X.2016.1168939>  
PMID:27142123
88. Bono P, Oudard S, Bodrogi I, Hutson TE, Escudier B, Machiels JP, Thompson JA, Figlin RA, Ravaud A, Basaran M, Porta C, Bracarda S, Brechenmacher T, et al. Outcomes in Patients With Metastatic Renal Cell Carcinoma Who Develop Everolimus-Related Hyperglycemia and Hypercholesterolemia: Combined Subgroup Analyses of the RECORD-1 and REACT Trials. *Clin Genitourin Cancer*. 2016; 14:406–14.  
<https://doi.org/10.1016/j.clgc.2016.04.011>  
PMID:27287020
89. Tanimura J, Nakagawa H, Tanaka T, Kikuchi A, Osada S, Tanaka Y, Tokuyama K, Takamura T. The clinical course and potential underlying mechanisms of everolimus-induced hyperglycemia. *Endocr J*. 2019; 66:615–20.  
<https://doi.org/10.1507/endocrj.EJ18-0542> PMID:30982794
90. Franco A, Más-Serrano P, Perez Contreras J, Jiménez L, Rodriguez D, Olivares J. Mammalian Target of Rapamycin Inhibitor Monotherapy: Efficacy in Renal Transplantation. *Transplant Proc*. 2015; 47:2364–67.  
<https://doi.org/10.1016/j.transproceed.2015.09.006>  
PMID:26518928
91. Veroux M, Corona D, Giuffrida G, Gagliano M, Sorbello M, Virgilio C, Tallarita T, Zerbo D, Giaquinta A, Fiamingo P, Macarone M, Li Volti G, Caglia P, Veroux P. New-onset diabetes mellitus after kidney transplantation: the role of immunosuppression. *Transplant Proc*. 2008; 40:1885–87.  
<https://doi.org/10.1016/j.transproceed.2008.06.005>  
PMID:18675079
92. Veroux M, Corona D, Giuffrida G, Gagliano M, Vizcarra D, Tallarita T, Zerbo D, Giaquinta A, Sorbello M, Macarone M, Veroux P. Sirolimus-based immunosuppression in kidney transplantation for type 2 diabetic nephropathy. *Urol Int*. 2010; 84:301–04.  
<https://doi.org/10.1159/000288232> PMID:20389159
93. Kälble F, Seckinger J, Schaier M, Morath C, Schwenger V, Zeier M, Sommerer C. Switch to an everolimus-facilitated cyclosporine A sparing immunosuppression improves glycemic control in selected kidney transplant recipients. *Clin Transplant*. 2017; 31:e13024.  
<https://doi.org/10.1111/ctr.13024>  
PMID:28581202
94. Krentz AJ, Wheeler DC. New-onset diabetes after transplantation: a threat to graft and patient survival. *Lancet*. 2005; 365:640–42.  
[https://doi.org/10.1016/S0140-6736\(05\)70914-4](https://doi.org/10.1016/S0140-6736(05)70914-4)  
PMID:15721460
95. Nanmoku K, Shinzato T, Kubo T, Shimizu T, Kimura T, Yagisawa T. Steroid Withdrawal Using Everolimus in ABO-Incompatible Kidney Transplant Recipients With Post-Transplant Diabetes Mellitus. *Transplant Proc*. 2018; 50:1050–55.  
<https://doi.org/10.1016/j.transproceed.2018.01.028>  
PMID:29631750
96. Veroux M, Tallarita T, Corona D, Sinagra N, Giaquinta A, Zerbo D, Guerrieri C, D'Assoro A, Cimino S, Veroux P. Conversion to sirolimus therapy in kidney transplant recipients with new onset diabetes mellitus after transplantation. *Clin Dev Immunol*. 2013; 2013:496974.  
<https://doi.org/10.1155/2013/496974>  
PMID:23762090
97. Johnston O, Rose CL, Webster AC, Gill JS. Sirolimus is associated with new-onset diabetes in kidney transplant recipients. *J Am Soc Nephrol*. 2008; 19:1411–18.  
<https://doi.org/10.1681/ASN.2007111202>  
PMID:18385422
98. Pavlakis M, Goldfarb-Rumyantzev AS. Diabetes after transplantation and sirolimus: what's the connection? *J Am Soc Nephrol*. 2008; 19:1255–56.  
<https://doi.org/10.1681/ASN.2008050474>  
PMID:18579636
99. Cohen EE, Wu K, Hartford C, Kocherginsky M, Eaton KN, Zha Y, Nallari A, Maitland ML, Fox-Kay K, Moshier K, House L, Ramirez J, Undevia SD, et al. Phase I studies of sirolimus alone or in combination with pharmacokinetic modulators in advanced cancer patients. *Clin Cancer Res*. 2012; 18:4785–93.



<https://doi.org/10.1158/1078-0432.CCR-12-0110>  
PMID:22872575

100. Crutchlow MF, Bloom RD. Transplant-associated hyperglycemia: a new look at an old problem. *Clin J Am Soc Nephrol*. 2007; 2:343–55.  
<https://doi.org/10.2215/CJN.03671106>  
PMID:17699434
101. Cuzick J, Thorat MA, Bosetti C, Brown PH, Burn J, Cook NR, Ford LG, Jacobs EJ, Jankowski JA, La Vecchia C, Law M, Meyskens F, Rothwell PM, et al. Estimates of benefits and harms of prophylactic use of aspirin in the general population. *Ann Oncol*. 2015; 26:47–57.  
<https://doi.org/10.1093/annonc/mdu225>  
PMID:25096604
102. Thorat MA, Cuzick J. Prophylactic use of aspirin: systematic review of harms and approaches to mitigation in the general population. *Eur J Epidemiol*. 2015; 30:5–18. <https://doi.org/10.1007/s10654-014-9971-7> PMID:25421783
103. Ceschi A, Heistermann E, Gros S, Reichert C, Kupferschmidt H, Banner NR, Krähenbühl S, Taegtmeyer AB. Acute sirolimus overdose: a multi-center case series. *PLoS One*. 2015; 10:e0128033. <https://doi.org/10.1371/journal.pone.0128033>  
PMID:26020944
104. Brattström C, Säwe J, Jansson B, Lönnebo A, Nordin J, Zimmerman JJ, Burke JT, Groth CG. Pharmacokinetics and safety of single oral doses of sirolimus (rapamycin) in healthy male volunteers. *Ther Drug Monit*. 2000; 22:537–44.  
<https://doi.org/10.1097/00007691-200010000-00006>  
PMID:11034258
105. Weiner SM, Sellin L, Vonend O, Schenker P, Buchner NJ, Flecken M, Viebahn R, Rump LC. Pneumonitis associated with sirolimus: clinical characteristics, risk factors and outcome—a single-centre experience and review of the literature. *Nephrol Dial Transplant*. 2007; 22:3631–37.  
<https://doi.org/10.1093/ndt/gfm420> PMID:17611248
106. Dunn JL, Kartchner LB, Gast K, Sessions M, Hunter RA, Thurlow L, Richardson A, Schoenfisch M, Cairns BA, Maile R. Mammalian target of rapamycin regulates a hyperresponsive state in pulmonary neutrophils late after burn injury. *J Leukoc Biol*. 2018; 103:909–18.  
<https://doi.org/10.1002/JLB.3AB0616-251RRR>  
PMID:29393976
107. Hebert M, Licursi M, Jensen B, Baker A, Milway S, Malsbury C, Grant VL, Adamec R, Hirasawa M, Blundell J. Single rapamycin administration induces prolonged downward shift in defended body weight in rats. *PLoS One*. 2014; 9:e93691.  
<https://doi.org/10.1371/journal.pone.0093691>  
PMID:24787262
108. Chen C, Liu Y, Liu Y, Zheng P. mTOR regulation and therapeutic rejuvenation of aging hematopoietic stem cells. *Sci Signal*. 2009; 2:ra75.  
<https://doi.org/10.1126/scisignal.2000559>  
PMID:19934433
109. Bitto A, Ito TK, Pineda VV, LeTexier NJ, Huang HZ, Sutlief E, Tung H, Vizzini N, Chen B, Smith K, Meza D, Yajima M, Beyer RP, et al. Transient rapamycin treatment can increase lifespan and healthspan in middle-aged mice. *eLife*. 2016; 5:5.  
<https://doi.org/10.7554/eLife.16351> PMID:27549339
110. Johnson SC, Kaeberlein M. Rapamycin in aging and disease: maximizing efficacy while minimizing side effects. *Oncotarget*. 2016; 7:44876–78.  
<https://doi.org/10.18632/oncotarget.10381>  
PMID:27384492
111. Johnson SC, Yanos ME, Bitto A, Castanza A, Gagnidze A, Gonzalez B, Gupta K, Hui J, Jarvie C, Johnson BM, Letexier N, McCanta L, Sangesland M, et al. Dose-dependent effects of mTOR inhibition on weight and mitochondrial disease in mice. *Front Genet*. 2015; 6:247. <https://doi.org/10.3389/fgene.2015.00247>  
PMID:26257774
112. Leontieva OV, Paszkiewicz GM, Blagosklonny MV. Comparison of rapamycin schedules in mice on high-fat diet. *Cell Cycle*. 2014; 13:3350–56.  
<https://doi.org/10.4161/15384101.2014.970491>  
PMID:25485580
113. Kaeberlein M. Rapamycin and ageing: when, for how long, and how much? *J Genet Genomics*. 2014; 41:459–63. <https://doi.org/10.1016/j.jgg.2014.06.009>  
PMID:25269671
114. Blagosklonny MV. Aging, stem cells, and mammalian target of rapamycin: a prospect of pharmacologic rejuvenation of aging stem cells. *Rejuvenation Res*. 2008; 11:801–08.  
<https://doi.org/10.1089/rej.2008.0722>  
PMID:18729812
115. Arriola Apelo SI, Pumper CP, Baar EL, Cummings NE, Lamming DW. Intermittent Administration of Rapamycin Extends the Life Span of Female C57BL/6J Mice. *J Gerontol A Biol Sci Med Sci*. 2016; 71:876–81.  
<https://doi.org/10.1093/gerona/glw064>  
PMID:27091134
116. Harman D, Harman H. “I thought, thought, thought for four months in vain and suddenly the idea came”—an interview with Denham and Helen Harman. Interview by K. Kitani and G.O. Ivy. *Biogerontology*. 2003; 4:401–12.  
<https://doi.org/10.1023/B:BGEN.0000006561.15498.68> PMID:14739712



117. Blagosklonny MV. Aging: ROS or TOR. *Cell Cycle*. 2008; 7:3344–54.  
<https://doi.org/10.4161/cc.7.21.6965>  
PMID:18971624
118. Lapointe J, Hekimi S. When a theory of aging ages badly. *Cell Mol Life Sci*. 2010; 67:1–8.  
<https://doi.org/10.1007/s00018-009-0138-8>  
PMID:19730800
119. Ristow M, Schmeisser K. Mitohormesis: Promoting Health and Lifespan by Increased Levels of Reactive Oxygen Species (ROS). *Dose Response*. 2014; 12:288–341.  
<https://doi.org/10.2203/dose-response.13-035.Ristow> PMID:24910588
120. Gems D, Partridge L. Genetics of longevity in model organisms: debates and paradigm shifts. *Annu Rev Physiol*. 2013; 75:621–44.  
<https://doi.org/10.1146/annurev-physiol-030212-183712> PMID:23190075
121. Gems D, de la Guardia Y. Alternative Perspectives on Aging in *Caenorhabditis elegans*: Reactive Oxygen Species or Hyperfunction? *Antioxid Redox Signal*. 2013; 19:321–29.  
<https://doi.org/10.1089/ars.2012.4840>  
PMID:22870907
122. Howes RM. The free radical fantasy: a panoply of paradoxes. *Ann N Y Acad Sci*. 2006; 1067:22–26.  
<https://doi.org/10.1196/annals.1354.004>  
PMID:16803966
123. Bjelakovic G, Nikolova D, Gluud LL, Simonetti RG, Gluud C. Mortality in randomized trials of antioxidant supplements for primary and secondary prevention: systematic review and meta-analysis. *JAMA*. 2007; 297:842–57.  
<https://doi.org/10.1001/jama.297.8.842>  
PMID:17327526
124. Bjelakovic G, Nikolova D, Gluud LL, Simonetti RG, Gluud C. Antioxidant supplements for prevention of mortality in healthy participants and patients with various diseases. *Cochrane Database Syst Rev*. 2012; 3:CD007176.  
<https://doi.org/10.1002/14651858.CD007176.pub2>  
PMID:22419320
125. Bjelakovic G, Nikolova D, Gluud C. Meta-regression analyses, meta-analyses, and trial sequential analyses of the effects of supplementation with beta-carotene, vitamin A, and vitamin E singly or in different combinations on all-cause mortality: do we have evidence for lack of harm? *PLoS One*. 2013; 8:e74558.  
<https://doi.org/10.1371/journal.pone.0074558>  
PMID:24040282
126. Bjelakovic G, Nikolova D, Gluud C. Antioxidant supplements and mortality. *Curr Opin Clin Nutr Metab Care*. 2014; 17:40–44.  
<https://doi.org/10.1097/MCO.000000000000009>  
PMID:24241129
127. Chong EW, Wong TY, Kreis AJ, Simpson JA, Guymer RH. Dietary antioxidants and primary prevention of age related macular degeneration: systematic review and meta-analysis. *BMJ*. 2007; 335:755.  
<https://doi.org/10.1136/bmj.39350.500428.47>  
PMID:17923720
128. Myung SK, Ju W, Cho B, Oh SW, Park SM, Koo BK, Park BJ, and Korean Meta-Analysis Study Group. Efficacy of vitamin and antioxidant supplements in prevention of cardiovascular disease: systematic review and meta-analysis of randomised controlled trials. *BMJ*. 2013; 346:f10.  
<https://doi.org/10.1136/bmj.f10> PMID:23335472
129. Ristow M, Zarse K, Oberbach A, Klötting N, Birringer M, Kiehnopf M, Stumvoll M, Kahn CR, Blüher M. Antioxidants prevent health-promoting effects of physical exercise in humans. *Proc Natl Acad Sci USA*. 2009; 106:8665–70.  
<https://doi.org/10.1073/pnas.0903485106>  
PMID:19433800
130. Ristow M, Schmeisser S. Extending life span by increasing oxidative stress. *Free Radic Biol Med*. 2011; 51:327–36.  
<https://doi.org/10.1016/j.freeradbiomed.2011.05.010>  
PMID:21619928
131. Omenn GS, Goodman GE, Thornquist MD, Balmes J, Cullen MR, Glass A, Keogh JP, Meyskens FL Jr, Valanis B, Williams JH Jr, Barnhart S, Hammar S. Effects of a combination of beta carotene and vitamin A on lung cancer and cardiovascular disease. *N Engl J Med*. 1996; 334:1150–55.  
<https://doi.org/10.1056/NEJM199605023341802>  
PMID:8602180
132. Goodman GE, Thornquist MD, Balmes J, Cullen MR, Meyskens FL Jr, Omenn GS, Valanis B, Williams JH Jr. The Beta-Carotene and Retinol Efficacy Trial: incidence of lung cancer and cardiovascular disease mortality during 6-year follow-up after stopping beta-carotene and retinol supplements. *J Natl Cancer Inst*. 2004; 96:1743–50.  
<https://doi.org/10.1093/inci/djh320> PMID:15572756
133. Wright ME, Virtamo J, Hartman AM, Pietinen P, Edwards BK, Taylor PR, Huttunen JK, Albanes D. Effects of alpha-tocopherol and beta-carotene supplementation on upper aerodigestive tract cancers in a large, randomized controlled trial. *Cancer*. 2007; 109:891–98.  
<https://doi.org/10.1002/cncr.22482> PMID:17265529
134. Piskounova E, Agathocleous M, Murphy MM, Hu Z, Huddleston SE, Zhao Z, Leitch AM, Johnson TM,

- DeBerardinis RJ, Morrison SJ. Oxidative stress inhibits distant metastasis by human melanoma cells. *Nature*. 2015; 527:186–91.  
<https://doi.org/10.1038/nature15726>  
PMID:26466563
135. Sayin VI, Ibrahim MX, Larsson E, Nilsson JA, Lindahl P, Bergo MO. Antioxidants accelerate lung cancer progression in mice. *Sci Transl Med*. 2014; 6:221ra15.  
<https://doi.org/10.1126/scitranslmed.3007653>  
PMID:24477002
  136. Le Gal K, Ibrahim MX, Wiel C, Sayin VI, Akula MK, Karlsson C, Dalin MG, Akyürek LM, Lindahl P, Nilsson J, Bergo MO. Antioxidants can increase melanoma metastasis in mice. *Sci Transl Med*. 2015; 7:308re8.  
<https://doi.org/10.1126/scitranslmed.aad3740>  
PMID:26446958
  137. Aguiar-Oliveira MH, Bartke A. Growth hormone deficiency: health and longevity. *Endocr Rev*. 2019; 40:575–601. <https://doi.org/10.1210/er.2018-00216>  
PMID:30576428
  138. Panici JA, Harper JM, Miller RA, Bartke A, Spong A, Masternak MM. Early life growth hormone treatment shortens longevity and decreases cellular stress resistance in long-lived mutant mice. *FASEB J*. 2010; 24:5073–79. <https://doi.org/10.1096/fj.10-163253>  
PMID:20720157
  139. Bartke A, Quainoo N. Impact of Growth Hormone-Related Mutations on Mammalian Aging. *Front Genet*. 2018; 9:586.  
<https://doi.org/10.3389/fgene.2018.00586>  
PMID:30542372
  140. Rudman D, Feller AG, Nagraj HS, Gergans GA, Lalitha PY, Goldberg AF, Schlenker RA, Cohn L, Rudman IW, Mattson DE. Effects of human growth hormone in men over 60 years old. *N Engl J Med*. 1990; 323:1–6.  
<https://doi.org/10.1056/NEJM199007053230101>  
PMID:2355952
  141. Vance ML. Can growth hormone prevent aging? *N Engl J Med*. 2003; 348:779–80.  
<https://doi.org/10.1056/NEJMp020186>  
PMID:12606731
  142. Kaeberlein M, Powers RW 3rd, Steffen KK, Westman EA, Hu D, Dang N, Kerr EO, Kirkland KT, Fields S, Kennedy BK. Regulation of yeast replicative life span by TOR and Sch9 in response to nutrients. *Science*. 2005; 310:1193–96.  
<https://doi.org/10.1126/science.1115535>  
PMID:16293764
  143. Vellai T, Takacs-Vellai K, Zhang Y, Kovacs AL, Orosz L, Müller F. Genetics: influence of TOR kinase on lifespan in *C. elegans*. *Nature*. 2003; 426:620.  
<https://doi.org/10.1038/426620a> PMID:14668850
  144. Kapahi P, Zid BM, Harper T, Koslover D, Sapin V, Benzer S. Regulation of lifespan in *Drosophila* by modulation of genes in the TOR signaling pathway. *Curr Biol*. 2004; 14:885–90.  
<https://doi.org/10.1016/j.cub.2004.03.059>  
PMID:15186745
  145. Stanfel MN, Shamieh LS, Kaeberlein M, Kennedy BK. The TOR pathway comes of age. *Biochim Biophys Acta*. 2009; 1790:1067–74.  
<https://doi.org/10.1016/j.bbagen.2009.06.007>  
PMID:19539012
  146. Blagosklonny MV. Cell senescence and hypermitogenic arrest. *EMBO Rep*. 2003; 4:358–62.  
<https://doi.org/10.1038/sj.embor.embor806>  
PMID:12671679
  147. Demidenko ZN, Blagosklonny MV. Growth stimulation leads to cellular senescence when the cell cycle is blocked. *Cell Cycle*. 2008; 7:3355–61.  
<https://doi.org/10.4161/cc.7.21.6919>  
PMID:18948731
  148. Blagosklonny MV. Validation of anti-aging drugs by treating age-related diseases. *Aging (Albany NY)*. 2009; 1:281–88.  
<https://doi.org/10.18632/aging.100034>  
PMID:20157517
  149. Blagosklonny MV. Answering the ultimate question “what is the proximal cause of aging?”. *Aging (Albany NY)*. 2012; 4:861–77.  
<https://doi.org/10.18632/aging.100525>  
PMID:23425777
  150. Blagosklonny MV. Disease or not, aging is easily treatable. *Aging (Albany NY)*. 2018; 10:3067–78.  
<https://doi.org/10.18632/aging.101647>  
PMID:30448823
  151. Blagosklonny MV. Aging is not programmed: genetic pseudo-program is a shadow of developmental growth. *Cell Cycle*. 2013; 12:3736–42.  
<https://doi.org/10.4161/cc.27188> PMID:24240128
  152. Wang H, Zhang Z, Gems D. Monsters in the uterus: teratoma-like tumors in senescent *C. elegans* result from a parthenogenetic quasi-program. *Aging (Albany NY)*. 2018; 10:1188–89.  
<https://doi.org/10.18632/aging.101486>  
PMID:29923830
  153. Blagosklonny MV. Rapamycin and quasi-programmed aging: four years later. *Cell Cycle*. 2010; 9:1859–62.  
<https://doi.org/10.4161/cc.9.10.11872>  
PMID:20436272
  154. Blagosklonny MV. From rapalogs to anti-aging formula. *Oncotarget*. 2017; 8:35492–507.  
<https://doi.org/10.18632/oncotarget.18033>

PMID:[28548953](#)

155. Harrison DE, Strong R, Sharp ZD, Nelson JF, Astle CM, Flurkey K, Nadon NL, Wilkinson JE, Frenkel K, Carter CS, Pahor M, Javors MA, Fernandez E, Miller RA. Rapamycin fed late in life extends lifespan in genetically heterogeneous mice. *Nature*. 2009; 460:392–95. <https://doi.org/10.1038/nature08221> PMID:[19587680](#)
156. Dodds SG, Livi CB, Parihar M, Hsu HK, Benavides AD, Morris J, Javors M, Strong R, Christy B, Hasty P, Sharp ZD. Adaptations to chronic rapamycin in mice. *Pathobiol Aging Age Relat Dis*. 2016; 6:31688. <https://doi.org/10.3402/pba.v6.31688> PMID:[27237224](#)
157. Swindell WR. Rapamycin in mice. *Aging (Albany NY)*. 2017; 9:1941–42. <https://doi.org/10.18632/aging.101289> PMID:[28876223](#)
158. Blagosklonny MV. Prospective treatment of age-related diseases by slowing down aging. *Am J Pathol*. 2012; 181:1142–46. <https://doi.org/10.1016/j.ajpath.2012.06.024> PMID:[22841821](#)
159. Blagosklonny MV. Koschei the immortal and anti-aging drugs. *Cell Death Dis*. 2014; 5:e1552. <https://doi.org/10.1038/cddis.2014.520> PMID:[25476900](#)
160. Cabreiro F, Au C, Leung KY, Vergara-Irigaray N, Cochemé HM, Noori T, Weinkove D, Schuster E, Greene ND, Gems D. Metformin retards aging in *C. elegans* by altering microbial folate and methionine metabolism. *Cell*. 2013; 153:228–39. <https://doi.org/10.1016/j.cell.2013.02.035> PMID:[23540700](#)
161. Chen J, Ou Y, Li Y, Hu S, Shao LW, Liu Y. Metformin extends *C. elegans* lifespan through lysosomal pathway. *eLife*. 2017; 6:6. <https://doi.org/10.7554/eLife.31268> PMID:[29027899](#)
162. Santos EL, de Picoli Souza K, da Silva ED, Batista EC, Martins PJ, D’Almeida V, Pesquero JB. Long term treatment with ACE inhibitor enalapril decreases body weight gain and increases life span in rats. *Biochem Pharmacol*. 2009; 78:951–58. <https://doi.org/10.1016/j.bcp.2009.06.018> PMID:[19549507](#)
163. Anisimov VN. Metformin: do we finally have an anti-aging drug? *Cell Cycle*. 2013; 12:3483–89. <https://doi.org/10.4161/cc.26928> PMID:[24189526](#)
164. Anisimov VN. Metformin for cancer and aging prevention: is it a time to make the long story short? *Oncotarget*. 2015; 6:39398–407. <https://doi.org/10.18632/oncotarget.6347> PMID:[26583576](#)
165. Haukka J, Niskanen L, Auvinen A. Risk of Cause-Specific Death in Individuals with Cancer-Modifying Role Diabetes, Statins and Metformin. *Int J Cancer*. 2017; 141:2437–49. <https://doi.org/10.1002/ijc.31016> PMID:[28840596](#)
166. Heckman-Stoddard BM, DeCensi A, Sahasrabuddhe VV, Ford LG. Repurposing metformin for the prevention of cancer and cancer recurrence. *Diabetologia*. 2017; 60:1639–47. <https://doi.org/10.1007/s00125-017-4372-6> PMID:[28776080](#)
167. Pietrocola F, Kroemer G. Metformin: a metabolic modulator. *Oncotarget*. 2017; 8:9017–20. <https://doi.org/10.18632/oncotarget.14794> PMID:[28122334](#)
168. Romero R, Erez O, Hüttemann M, Maymon E, Panaitescu B, Conde-Agudelo A, Pacora P, Yoon BH, Grossman LI. Metformin, the aspirin of the 21st century: its role in gestational diabetes mellitus, prevention of preeclampsia and cancer, and the promotion of longevity. *Am J Obstet Gynecol*. 2017; 217:282–302. <https://doi.org/10.1016/j.ajog.2017.06.003> PMID:[28619690](#)
169. Cuzick J. Progress in preventive therapy for cancer: a reminiscence and personal viewpoint. *Br J Cancer*. 2018; 118:1155–61. <https://doi.org/10.1038/s41416-018-0039-4> PMID:[29681616](#)
170. Islam BN, Sharman SK, Hou Y, Bridges AE, Singh N, Kim S, Kolhe R, Trillo-Tinoco J, Rodriguez PC, Berger FG, Sridhar S, Browning DD. Sildenafil Suppresses Inflammation-Driven Colorectal Cancer in Mice. *Cancer Prev Res (Phila)*. 2017; 10:377–88. <https://doi.org/10.1158/1940-6207.CAPR-17-0015> PMID:[28468928](#)
171. Weiss R, Fernandez E, Liu Y, Strong R, Salmon AB. Metformin reduces glucose intolerance caused by rapamycin treatment in genetically heterogeneous female mice. *Aging (Albany NY)*. 2018; 10:386–401. <https://doi.org/10.18632/aging.101401> PMID:[29579736](#)
172. Taylor DH Jr, Hasselblad V, Henley SJ, Thun MJ, Sloan FA. Benefits of smoking cessation for longevity. *Am J Public Health*. 2002; 92:990–96. <https://doi.org/10.2105/AJPH.92.6.990> PMID:[12036794](#)
173. Lipman RD, Smith DE, Bronson RT, Blumberg J. Is late-life caloric restriction beneficial? *Aging (Milano)*. 1995; 7:136–39. PMID:[7548264](#)

174. Dirks AJ, Leeuwenburgh C. Caloric restriction in humans: potential pitfalls and health concerns. *Mech Ageing Dev.* 2006; 127:1–7.  
<https://doi.org/10.1016/j.mad.2005.09.001>  
PMID:[16226298](https://pubmed.ncbi.nlm.nih.gov/16226298/)
175. Goto S. Health span extension by later-life caloric or dietary restriction: a view based on rodent studies. *Biogerontology.* 2006; 7:135–38.  
<https://doi.org/10.1007/s10522-006-9011-4>  
PMID:[16732405](https://pubmed.ncbi.nlm.nih.gov/16732405/)
176. Newman AB, Yanez D, Harris T, Duxbury A, Enright PL, Fried LP, and Cardiovascular Study Research Group. Weight change in old age and its association with mortality. *J Am Geriatr Soc.* 2001; 49:1309–18.  
<https://doi.org/10.1046/j.1532-5415.2001.49258.x>  
PMID:[11890489](https://pubmed.ncbi.nlm.nih.gov/11890489/)
177. Lee CG, Boyko EJ, Nielson CM, Stefanick ML, Bauer DC, Hoffman AR, Dam TT, Lapidus JA, Cawthon PM, Ensrud KE, Orwoll ES, and Osteoporotic Fractures in Men Study Group. Mortality risk in older men associated with changes in weight, lean mass, and fat mass. *J Am Geriatr Soc.* 2011; 59:233–40.  
<https://doi.org/10.1111/j.1532-5415.2010.03245.x>  
PMID:[21288234](https://pubmed.ncbi.nlm.nih.gov/21288234/)
178. Wannamethee SG, Shaper AG, Lennon L. Reasons for intentional weight loss, unintentional weight loss, and mortality in older men. *Arch Intern Med.* 2005; 165:1035–40.  
<https://doi.org/10.1001/archinte.165.9.1035>  
PMID:[15883243](https://pubmed.ncbi.nlm.nih.gov/15883243/)
179. Sengupta S, Peterson TR, Laplante M, Oh S, Sabatini DM. mTORC1 controls fasting-induced ketogenesis and its modulation by ageing. *Nature.* 2010; 468:1100–04. <https://doi.org/10.1038/nature09584>  
PMID:[21179166](https://pubmed.ncbi.nlm.nih.gov/21179166/)
180. White Z, White RB, McMahon C, Grounds MD, Shavlakadze T. High mTORC1 signaling is maintained, while protein degradation pathways are perturbed in old murine skeletal muscles in the fasted state. *Int J Biochem Cell Biol.* 2016; 78:10–21.  
<https://doi.org/10.1016/j.biocel.2016.06.012>  
PMID:[27343428](https://pubmed.ncbi.nlm.nih.gov/27343428/)
181. Flynn JM, O’Leary MN, Zambataro CA, Academia EC, Presley MP, Garrett BJ, Zykovich A, Mooney SD, Strong R, Rosen CJ, Kapahi P, Nelson MD, Kennedy BK, Melov S. Late-life rapamycin treatment reverses age-related heart dysfunction. *Aging Cell.* 2013; 12:851–62. <https://doi.org/10.1111/accel.12109>  
PMID:[23734717](https://pubmed.ncbi.nlm.nih.gov/23734717/)
182. Unnikrishnan A, Kurup K, Salmon AB, Richardson A. Is Rapamycin a Dietary Restriction Mimetic? *J Gerontol A Biol Sci Med Sci.* 2019;glz060.  
<https://doi.org/10.1093/gerona/glez060>  
PMID:[30854544](https://pubmed.ncbi.nlm.nih.gov/30854544/)
183. Fok WC, Zhang Y, Salmon AB, Bhattacharya A, Gunda R, Jones D, Ward W, Fisher K, Richardson A, Pérez VI. Short-term treatment with rapamycin and dietary restriction have overlapping and distinctive effects in young mice. *J Gerontol A Biol Sci Med Sci.* 2013; 68:108–16. <https://doi.org/10.1093/gerona/glez127>  
PMID:[22570137](https://pubmed.ncbi.nlm.nih.gov/22570137/)
184. Fok WC, Bokov A, Gelfond J, Yu Z, Zhang Y, Doderer M, Chen Y, Javors M, Wood WH 3rd, Zhang Y, Becker KG, Richardson A, Pérez VI. Combined treatment of rapamycin and dietary restriction has a larger effect on the transcriptome and metabolome of liver. *Aging Cell.* 2014; 13:311–19.  
<https://doi.org/10.1111/accel.12175> PMID:[24304444](https://pubmed.ncbi.nlm.nih.gov/24304444/)
185. Yu Z, Wang R, Fok WC, Coles A, Salmon AB, Pérez VI. Rapamycin and dietary restriction induce metabolically distinctive changes in mouse liver. *J Gerontol A Biol Sci Med Sci.* 2015; 70:410–20.  
<https://doi.org/10.1093/gerona/gleu053>  
PMID:[24755936](https://pubmed.ncbi.nlm.nih.gov/24755936/)
186. Karunadharma PP, Basisty N, Dai DF, Chiao YA, Quarles EK, Hsieh EJ, Crispin D, Bielas JH, Ericson NG, Beyer RP, MacKay VL, MacCoss MJ, Rabinovitch PS. Subacute calorie restriction and rapamycin discordantly alter mouse liver proteome homeostasis and reverse aging effects. *Aging Cell.* 2015; 14:547–57.  
<https://doi.org/10.1111/accel.12317> PMID:[25807975](https://pubmed.ncbi.nlm.nih.gov/25807975/)
187. Ye L, Widlund AL, Sims CA, Lamming DW, Guan Y, Davis JG, Sabatini DM, Harrison DE, Vang O, Baur JA. Rapamycin doses sufficient to extend lifespan do not compromise muscle mitochondrial content or endurance. *Aging (Albany NY).* 2013; 5:539–50.  
<https://doi.org/10.18632/aging.100576>  
PMID:[23929887](https://pubmed.ncbi.nlm.nih.gov/23929887/)
188. Tang H, Shrager JB, Goldman D. Rapamycin protects aging muscle. *Aging (Albany NY).* 2019; 11:5868–70.  
<https://doi.org/10.18632/aging.102176>  
PMID:[31454792](https://pubmed.ncbi.nlm.nih.gov/31454792/)
189. Joseph GA, Wang SX, Jacobs CE, Zhou W, Kimble GC, Tse HW, Eash JK, Shavlakadze T, Glass DJ. Partial inhibition of mTORC1 in aged rats counteracts the decline in muscle mass and reverses molecular signaling associated with sarcopenia. *Mol Cell Biol.* 2019; 39:e00141-19.  
<https://doi.org/10.1128/MCB.00141-19>  
PMID:[31308131](https://pubmed.ncbi.nlm.nih.gov/31308131/)
190. Tang H, Inoki K, Brooks SV, Okazawa H, Lee M, Wang J, Kim M, Kennedy CL, Macpherson PC, Ji X, Van Roekel S, Fraga DA, Wang K, et al. mTORC1 underlies age-related muscle fiber damage and loss by inducing

- oxidative stress and catabolism. *Aging Cell*. 2019; 18:e12943. <https://doi.org/10.1111/accel.12943> PMID:[30924297](#)
191. Aliper A, Jellen L, Cortese F, Artemov A, Karpinsky-Semper D, Moskalev A, Swick AG, Zhavoronkov A. Towards natural mimetics of metformin and rapamycin. *Aging (Albany NY)*. 2017; 9:2245–68. <https://doi.org/10.18632/aging.101319> PMID:[29165314](#)
  192. Blagosklonny MV. How to save Medicare: the anti-aging remedy. *Aging (Albany NY)*. 2012; 4:547–52. <https://doi.org/10.18632/aging.100479> PMID:[22915707](#)
  193. An JY, Quarles EK, Mekvanich S, Kang A, Liu A, Santos D, Miller RA, Rabinovitch PS, Cox TC, Kaeberlein M. Rapamycin treatment attenuates age-associated periodontitis in mice. *Geroscience*. 2017; 39:457–63. <https://doi.org/10.1007/s11357-017-9994-6> PMID:[28889220](#)
  194. Carosi JM, Sargeant TJ. Rapamycin and Alzheimer disease: a double-edged sword? *Autophagy*. 2019; 15:1460–62. <https://doi.org/10.1080/15548627.2019.1615823> PMID:[31066320](#)
  195. Whyte LS, Lau AA, Hemsley KM, Hopwood JJ, Sargeant TJ. Endo-lysosomal and autophagic dysfunction: a driving factor in Alzheimer's disease? *J Neurochem*. 2017; 140:703–17. <https://doi.org/10.1111/jnc.13935> PMID:[28027395](#)
  196. Leontieva OV, Blagosklonny MV. Gerosuppression by pan-mTOR inhibitors. *Aging (Albany NY)*. 2016; 8:3535–51. <https://doi.org/10.18632/aging.101155> PMID:[28077803](#)
  197. Walters HE, Deneka-Hannemann S, Cox LS. Reversal of phenotypes of cellular senescence by pan-mTOR inhibition. *Aging (Albany NY)*. 2016; 8:231–44. <https://doi.org/10.18632/aging.100872> PMID:[26851731](#)
  198. Demidenko ZN, Korotchkina LG, Gudkov AV, Blagosklonny MV. Paradoxical suppression of cellular senescence by p53. *Proc Natl Acad Sci USA*. 2010; 107:9660–64. <https://doi.org/10.1073/pnas.1002298107> PMID:[20457898](#)
  199. Christy B, Demaria M, Campisi J, Huang J, Jones D, Dodds SG, Williams C, Hubbard G, Livi CB, Gao X, Weintraub S, Curiel T, Sharp ZD, Hasty P. p53 and rapamycin are additive. *Oncotarget*. 2015; 6:15802–13. <https://doi.org/10.18632/oncotarget.4602> PMID:[26158292](#)
  200. Demidenko ZN, Shtutman M, Blagosklonny MV. Pharmacologic inhibition of MEK and PI-3K converges on the mTOR/S6 pathway to decelerate cellular senescence. *Cell Cycle*. 2009; 8:1896–900. <https://doi.org/10.4161/cc.8.12.8809> PMID:[19478560](#)
  201. Castillo-Quan JI, Tain LS, Kinghorn KJ, Li L, Grönke S, Hinze Y, Blackwell TK, Bjedov I, Partridge L. A triple drug combination targeting components of the nutrient-sensing network maximizes longevity. *Proc Natl Acad Sci USA*. 2019; [Epub ahead of print]. <https://doi.org/10.1073/pnas.1913212116> PMID:[31570569](#)
  202. Castillo-Quan JI, Li L, Kinghorn KJ, Ivanov DK, Tain LS, Slack C, Kerr F, Nespital T, Thornton J, Hardy J, Bjedov I, Partridge L. Lithium Promotes Longevity through GSK3/NRF2-Dependent Hormesis. *Cell Rep*. 2016; 15:638–50. <https://doi.org/10.1016/j.celrep.2016.03.041> PMID:[27068460](#)



## Rapamycin for the aging skin

Mikhail V. Blagosklonny

In 2007, I filed a patent application claiming that topical rapamycin (e.g., in the form of a cream or ointment) <https://patents.google.com/patent/WO2008022256A2/en> could be used to prevent and treat skin aging. Potential indications include various types of age-related spots, wrinkles, photo-aged skin, and other age-related skin conditions. The patent was not granted, nor were cosmetic companies interested in pursuing this avenue of product development. Cell senescence has traditionally been seen as growth arrest. It seemed weird that rapamycin, a drug that inhibits growth, could inhibit cellular senescence. Nonetheless, it works because, actually, senescence is a continuation of growth when true growth is impossible [1]; in other words, senescence is “twisted” growth [2]. In an exciting ‘twist’, these claims were recently confirmed in a clinical trial by Chung et al. [3], which I will discuss later.

Even in 2007, the idea of using rapamycin topically was not novel [4, 5]. (What was novel in my application was the idea of using topical rapamycin as an anti-aging drug for the aging skin [1]). By now, there have been dozens of papers describing the therapeutic use of rapamycin (Sirolimus) in patients with such skin diseases as lymphatic malformations, vascular anomalies, Facial Angiofibroma and psoriasis [6-13]. These diseases were treated in children and young adults. In one study, topical rapamycin at low doses (0.003-0.015%) decreased facial angiofibromas in young adults. There was no systemic absorption of rapamycin (blood levels were <1.0 ng/mL) [13].

Returning to cellular senescence, signaling in the mTOR (Target of Rapamycin) pathway drives growth of cellular mass and sustains cell cycle progression. Cells grow and divide, balancing growth. But when the cell cycle is suddenly blocked by p16 or p21, mTOR drives growth-like conversion from reversible arrest (quiescence) to senescence [2, 14]. In short, mTOR drives geroconversion [15]. Rapamycin and its analogs, as well as pan-mTOR inhibitors, suppress geroconversion, thereby maintaining cells in a young healthy state. Moreover, these drugs prevent loss of cells’ proliferative potential, which is considered a strict definition of senescence [2, 15]. Geroconversion in stem cells leads to stem cells depletion [16, 17]. mTOR-driven hypertrophy can be followed by atrophy at the end stages. Cellular hyperfunction eventually leads to cellular exhaustion and secondary functional decline [1].

Suppression of cellular senescence by rapamycin was demonstrated in numerous studies both in vivo and in vitro [18-30] and see for references [15]. In vitro, rapamycin slows conversion to senescence by approximately 3-fold [14]; it does not suppress it completely. Notably in that regard, in the most rapamycin-responsive mouse model of mitochondrial disease, rapamycin extends the maximum life span by nearly 3-fold [31].

Just as *in vitro* geroconversion is a continuation of growth, organismal aging is an unintended and harmful continuation of developmental growth post-development [1, 32]. These messy quasi-programs inevitably lead to age-related diseases, which include conditions ranging from obesity, cancer and Alzheimer’s disease to skin spots, wrinkles and seborrheic keratoses. mTOR drives geroconversion, increasing cellular functionality (e.g., the senescence-associated secretory phenotype). It is noteworthy that this increase in cellular activity can cause secondary exhaustion, tissue damage and decreased of organ function; for example, hypertrophy may be followed by atrophy at later stages. In other words, age-related diseases and conditions initially caused by mTOR-driven hyperfunction eventually lead to organ damage and functional decline [1, 33]. Similar quasi-programs were described even in the worm [34-36]. In sum, aging is an unintentional and harmful continuation of developmental programs, driven in part by mTOR. To be clear, mTOR activity does not need to increase with age, just keeping it at a level as high as during development is sufficient to cause disease. Despite its simplicity, this model accurately predicts that rapamycin will extend life and delay diseases. Indeed, since initial publications [18, 37, 38, 39], numerous studies have confirmed that rapamycin extends lifespan in mice (see for references [40-44]).

In that context, it is predictable that rapamycin would slow skin aging. However, unless rapamycin reverses skin aging, not merely slow it, the effect would be difficult to document. This is because a patient cannot serve as a self-control (placebo control) unless rapamycin reverses aging, which would be easy to detect. This difficulty can be overcome, however, by comparing an untreated hand with a hand treated with topically applied rapamycin in the same subject. This is the approach taken by Chung et al. in their study, which found that treatment with rapamycin-containing cream

improved skin photoaging and skin tone, decreased fine wrinkles, increased dermal volume, and reduced sagging of the skin [3]. These differences between treated and untreated hands were detectable after 4 months of the treatment [3]. Regrettably, the study excluded patients with diabetes, although the therapeutic effect would probably be more significant in diabetic patients, given that mTOR is overactivated in that disease. In addition, it is unclear whether rapamycin reversed skin aging and improved the skin or merely slowed the progression of skin aging. In the latter scenario, the difference between the treated and untreated hands is due to the progression of aging in the untreated hands. In combination with placebo/treatment, comparisons of specific abnormalities before and after treatment is also needed. Despite these open questions the study is remarkable [3].

As a cosmetic, rapamycin-containing cream may be applied to selected areas, like the hands and face, especially skin affected by age-related spots and pathologies. It should not be applied to the entire skin surface of the body. To affect the entire skin surface, systemic use of rapamycin would likely be a better option, as many manifestations of skin aging are probably due to systemic organismal aging and disease; skin aging is not an exclusively local process. And most importantly, systemic rapamycin use increases lifespan and decreases disease. This by itself is so important that solely topical use of rapamycin may seem insufficient. On the other hand, topical application of any drug is safer than systemic administration. Still, the best strategy in some cases may be simultaneous systemic and topical use of rapamycin in selected areas of the skin, especially areas where there are signs of aging marks. However, given that most doctors are fearful of systemic treatment with rapamycin [45], I expect that it will be topical use of rapamycin that becomes widespread, if regulatory hurdles can be overcome. Whether rapamycin cream should be a prescription treatment or an over-the-counter cosmetic will likely be a matter of debate.

## REFERENCES

1. Blagosklonny MV. Aging and immortality: quasi-programmed senescence and its pharmacologic inhibition. *Cell Cycle*. 2006; 5:2087–102. <https://doi.org/10.4161/cc.5.18.3288> PMID:17012837
2. Demidenko ZN, Blagosklonny MV. Growth stimulation leads to cellular senescence when the cell cycle is blocked. *Cell Cycle*. 2008; 7:3355–61. <https://doi.org/10.4161/cc.7.21.6919> PMID:18948731
3. Chung CL, Lawrence I, Hoffman M, Elgindi D, Nadhan K, Potnis M, Jin A, Sershon C, Binnebose R, Lorenzini A, Sell C. Topical rapamycin reduces markers of senescence and aging in human skin: an exploratory, prospective, randomized trial. *Geroscience*. 2019; 41:861–69. <https://doi.org/10.1007/s11357-019-00113-y> PMID:31761958
4. Meingassner JG, Stütz A. Immunosuppressive macrolides of the type FK 506: a novel class of topical agents for treatment of skin diseases? *J Invest Dermatol*. 1992; 98:851–55. <https://doi.org/10.1111/1523-1747.ep12456939> PMID:1375617
5. Ormerod AD, Shah SA, Copeland P, Omar G, Winfield A. Treatment of psoriasis with topical sirolimus: preclinical development and a randomized, double-blind trial. *Br J Dermatol*. 2005; 152:758–64. <https://doi.org/10.1111/j.1365-2133.2005.06438.x> PMID:15840110
6. Sandbank S, Molho-Pessach V, Farkas A, Barzilai A, Greenberger S. Oral and Topical Sirolimus for Vascular Anomalies: A Multicentre Study and Review. *Acta Derm Venereol*. 2019; 99:990–96. <https://doi.org/10.2340/00015555-3262> PMID:31304557
7. Wataya-Kaneda M, Nakamura A, Tanaka M, Hayashi M, Matsumoto S, Yamamoto K, Katayama I. Efficacy and Safety of Topical Sirolimus Therapy for Facial Angiofibromas in the Tuberous Sclerosis Complex : A Randomized Clinical Trial. *JAMA Dermatol*. 2017; 153:39–48. <https://doi.org/10.1001/jamadermatol.2016.3545> PMID:27837201
8. García-Montero P, Del Boz J, Sanchez-Martínez M, Escudero Santos IM, Baselga E. Microcystic Lymphatic Malformation Successfully Treated With Topical Rapamycin. *Pediatrics*. 2017; 139:e20162105. <https://doi.org/10.1542/peds.2016-2105> PMID:28557723
9. Tanaka M, Wataya-Kaneda M, Nakamura A, Matsumoto S, Katayama I. First left-right comparative study of topical rapamycin vs. vehicle for facial angiofibromas in patients with tuberous sclerosis complex. *Br J Dermatol*. 2013; 169:1314–18. <https://doi.org/10.1111/bjd.12567> PMID:23909960
10. Wheless JW, Almoazen H. A novel topical rapamycin cream for the treatment of facial angiofibromas in tuberous sclerosis complex. *J Child Neurol*. 2013; 28:933–36. <https://doi.org/10.1177/0883073813488664> PMID:23680945

11. Koenig MK, Bell CS, Hebert AA, Roberson J, Samuels JA, Slopis JM, Tate P, Northrup H, Collaborators TT, and TREATMENT Trial Collaborators. Efficacy and Safety of Topical Rapamycin in Patients With Facial Angiofibromas Secondary to Tuberous Sclerosis Complex: The TREATMENT Randomized Clinical Trial. *JAMA Dermatol.* 2018; 154:773–80. <https://doi.org/10.1001/jamadermatol.2018.0464> PMID:29800048
12. Truchuelo T, Díaz-Ley B, Ríos L, Alcántara J, Jaén P. Facial angiofibromas treated with topical rapamycin: an excellent choice with fast response. *Dermatol Online J.* 2012; 18:15. PMID:22301052
13. Koenig MK, Hebert AA, Roberson J, Samuels J, Slopis J, Woerner A, Northrup H. Topical rapamycin therapy to alleviate the cutaneous manifestations of tuberous sclerosis complex: a double-blind, randomized, controlled trial to evaluate the safety and efficacy of topically applied rapamycin. *Drugs R D.* 2012; 12:121–26. <https://doi.org/10.2165/11634580-000000000-00000> PMID:22934754
14. Demidenko ZN, Zubova SG, Bukreeva EI, Pospelov VA, Pospelova TV, Blagosklonny MV. Rapamycin decelerates cellular senescence. *Cell Cycle.* 2009; 8:1888–95. <https://doi.org/10.4161/cc.8.12.8606> PMID:19471117
15. Blagosklonny MV. Rapamycin, proliferation and geroconversion to senescence. *Cell Cycle.* 2018; 17:2655–65. <https://doi.org/10.1080/15384101.2018.1554781> PMID:30541374
16. Sousa-Victor P, García-Prat L, Muñoz-Cánoves P. Dual mTORC1/C2 inhibitors: gerosuppressors with potential anti-aging effect. *Oncotarget.* 2015; 6:23052–54. <https://doi.org/10.18632/oncotarget.5563> PMID:26375366
17. Sousa-Victor P, Perdiguero E, Muñoz-Cánoves P. Geroconversion of aged muscle stem cells under regenerative pressure. *Cell Cycle.* 2014; 13:3183–90. <https://doi.org/10.4161/15384101.2014.965072> PMID:25485497
18. Chen C, Liu Y, Liu Y, Zheng P. mTOR regulation and therapeutic rejuvenation of aging hematopoietic stem cells. *Sci Signal.* 2009; 2:ra75. <https://doi.org/10.1126/scisignal.2000559> PMID:19934433
19. Iglesias-Bartolome R, Patel V, Cotrim A, Leelahavanichkul K, Molinolo AA, Mitchell JB, Gutkind JS. mTOR inhibition prevents epithelial stem cell senescence and protects from radiation-induced mucositis. *Cell Stem Cell.* 2012; 11:401–14. <https://doi.org/10.1016/j.stem.2012.06.007> PMID:22958932
20. Wang R, Yu Z, Sunchu B, Shoaf J, Dang I, Zhao S, Caples K, Bradley L, Beaver LM, Ho E, Löhr CV, Perez VI. Rapamycin inhibits the secretory phenotype of senescent cells by a Nrf2-independent mechanism. *Aging Cell.* 2017; 16:564–74. <https://doi.org/10.1111/acer.12587> PMID:28371119
21. Herranz N, Gallage S, Mellone M, Wuestefeld T, Klotz S, Hanley CJ, Raguz S, Acosta JC, Innes AJ, Banito A, Georgilis A, Montoya A, Wolter K, et al. mTOR regulates MAPKAPK2 translation to control the senescence-associated secretory phenotype. *Nat Cell Biol.* 2015; 17:1205–17. <https://doi.org/10.1038/ncb3225> PMID:26280535
22. Hinojosa CA, Mgbemena V, Van Roekel S, Austad SN, Miller RA, Bose S, Orihuela CJ. Enteric-delivered rapamycin enhances resistance of aged mice to pneumococcal pneumonia through reduced cellular senescence. *Exp Gerontol.* 2012; 47:958–65. <https://doi.org/10.1016/j.exger.2012.08.013> PMID:22981852
23. Gu Z, Tan W, Ji J, Feng G, Meng Y, Da Z, Guo G, Xia Y, Zhu X, Shi G, Cheng C. Rapamycin reverses the senescent phenotype and improves immunoregulation of mesenchymal stem cells from MRL/lpr mice and systemic lupus erythematosus patients through inhibition of the mTOR signaling pathway. *Aging (Albany NY).* 2016; 8:1102–14. <https://doi.org/10.18632/aging.100925> PMID:27048648
24. Gao C, Ning B, Sang C, Zhang Y. Rapamycin prevents the intervertebral disc degeneration via inhibiting differentiation and senescence of annulus fibrosus cells. *Aging (Albany NY).* 2018; 10:131–43. <https://doi.org/10.18632/aging.101364> PMID:29348392
25. Horvath S, Lu AT, Cohen H, Raj K. Rapamycin retards epigenetic ageing of keratinocytes independently of its effects on replicative senescence, proliferation and differentiation. *Aging (Albany NY).* 2019; 11:3238–49. <https://doi.org/10.18632/aging.101976> PMID:31136303
26. Walters HE, Deneka-Hannemann S, Cox LS. Reversal of phenotypes of cellular senescence by pan-mTOR inhibition. *Aging (Albany NY).* 2016; 8:231–44. <https://doi.org/10.18632/aging.100872> PMID:26851731
27. Laberge RM, Sun Y, Orjalo AV, Patil CK, Freund A,

- Zhou L, Curran SC, Davalos AR, Wilson-Edell KA, Liu S, Limbad C, Demaria M, Li P, et al. MTOR regulates the pro-tumorigenic senescence-associated secretory phenotype by promoting IL1A translation. *Nat Cell Biol*. 2015; 17:1049–61.  
<https://doi.org/10.1038/ncb3195> PMID:26147250
28. Christy B, Demaria M, Campisi J, Huang J, Jones D, Dodds SG, Williams C, Hubbard G, Livi CB, Gao X, Weintraub S, Curiel T, Sharp ZD, Hasty P. p53 and rapamycin are additive. *Oncotarget*. 2015; 6:15802–13.  
<https://doi.org/10.18632/oncotarget.4602> PMID:26158292
  29. Pospelova TV, Bykova TV, Zubova SG, Katolikova NV, Yartzeva NM, Pospelov VA. Rapamycin induces pluripotent genes associated with avoidance of replicative senescence. *Cell Cycle*. 2013; 12:3841–51.  
<https://doi.org/10.4161/cc.27396> PMID:24296616
  30. Leontieva OV, Blagosklonny MV. While reinforcing cell cycle arrest, rapamycin and Torins suppress senescence in UVA-irradiated fibroblasts. *Oncotarget*. 2017; 8:109848–56.  
<https://doi.org/10.18632/oncotarget.17827> PMID:29312653
  31. Johnson SC, Yanos ME, Kayser EB, Quintana A, Sangesland M, Castanza A, Uhde L, Hui J, Wall VZ, Gagnidze A, Oh K, Wasko BM, Ramos FJ, et al. mTOR inhibition alleviates mitochondrial disease in a mouse model of Leigh syndrome. *Science*. 2013; 342:1524–28.  
<https://doi.org/10.1126/science.1244360> PMID:24231806
  32. Blagosklonny MV. TOR-driven aging: speeding car without brakes. *Cell Cycle*. 2009; 8:4055–59.  
<https://doi.org/10.4161/cc.8.24.10310> PMID:19923900
  33. Blagosklonny MV. Answering the ultimate question “what is the proximal cause of aging?”. *Aging (Albany NY)*. 2012; 4:861–77.  
<https://doi.org/10.18632/aging.100525> PMID:23425777
  34. Gems D, de la Guardia Y. Alternative Perspectives on Aging in *Caenorhabditis elegans*: Reactive Oxygen Species or Hyperfunction? *Antioxid Redox Signal*. 2013; 19:321–29.  
<https://doi.org/10.1089/ars.2012.4840> PMID:22870907
  35. Wang H, Zhang Z, Gems D. Monsters in the uterus: teratoma-like tumors in senescent *C. elegans* result from a parthenogenetic quasi-program. *Aging (Albany NY)*. 2018; 10:1188–89.  
<https://doi.org/10.18632/aging.101486> PMID:29923830
  36. Wang H, Zhao Y, Ezcurra M, Benedetto A, Gilliat AF, Hellberg J, Ren Z, Galimov ER, Athigapanich T, Girstmair J, Telford MJ, Dolphin CT, Zhang Z, Gems D. A parthenogenetic quasi-program causes teratoma-like tumors during aging in wild-type *C. elegans*. *NPJ Aging Mech Dis*. 2018; 4:6.  
<https://doi.org/10.1038/s41514-018-0025-3> PMID:29928508
  37. Harrison DE, Strong R, Sharp ZD, Nelson JF, Astle CM, Flurkey K, Nadon NL, Wilkinson JE, Frenkel K, Carter CS, Pahor M, Javors MA, Fernandez E, Miller RA. Rapamycin fed late in life extends lifespan in genetically heterogeneous mice. *Nature*. 2009; 460:392–95.  
<https://doi.org/10.1038/nature08221> PMID:19587680
  38. Anisimov VN, Zabezhinski MA, Popovich IG, Piskunova TS, Semchenko AV, Tyndyk ML, Yurova MN, Antoch MP, Blagosklonny MV. Rapamycin extends maximal lifespan in cancer-prone mice. *Am J Pathol*. 2010; 176:2092–97.  
<https://doi.org/10.2353/ajpath.2010.091050> PMID:20363920
  39. Miller RA, Harrison DE, Astle CM, Baur JA, Boyd AR, de Cabo R, Fernandez E, Flurkey K, Javors MA, Nelson JF, Orihuela CJ, Pletcher S, Sharp ZD, et al. Rapamycin, but not resveratrol or simvastatin, extends life span of genetically heterogeneous mice. *J Gerontol A Biol Sci Med Sci*. 2011; 66:191–201.  
<https://doi.org/10.1093/gerona/glq178> PMID:20974732
  40. Miller RA, Harrison DE, Astle CM, Fernandez E, Flurkey K, Han M, Javors MA, Li X, Nadon NL, Nelson JF, Pletcher S, Salmon AB, Sharp ZD, et al. Rapamycin-mediated lifespan increase in mice is dose and sex dependent and metabolically distinct from dietary restriction. *Aging Cell*. 2014; 13:468–77.  
<https://doi.org/10.1111/ace.12194> PMID:24341993
  41. Johnson SC, Kaeberlein M. Rapamycin in aging and disease: maximizing efficacy while minimizing side effects. *Oncotarget*. 2016; 7:44876–78.  
<https://doi.org/10.18632/oncotarget.10381> PMID:27384492
  42. Swindell WR. Rapamycin in mice. *Aging (Albany NY)*. 2017; 9:1941–42.  
<https://doi.org/10.18632/aging.101289> PMID:28876223
  43. Bitto A, Ito TK, Pineda VV, LeTexier NJ, Huang HZ, Sutlief E, Tung H, Vizzini N, Chen B, Smith K, Meza D, Yajima M, Beyer RP, et al. Transient rapamycin treatment can increase lifespan and healthspan in middle-aged mice. *eLife*. 2016; 5:5.

<https://doi.org/10.7554/eLife.16351> PMID:[27549339](https://pubmed.ncbi.nlm.nih.gov/27549339/)

44. Blagosklonny MV. Rapamycin and quasi-programmed aging: four years later. *Cell Cycle*. 2010; 9:1859–62.  
<https://doi.org/10.4161/cc.9.10.11872>  
PMID:[20436272](https://pubmed.ncbi.nlm.nih.gov/20436272/)
45. Blagosklonny MV. Rapamycin for longevity: opinion article. *Aging (Albany NY)*. 2019; 11:8048–67.  
<https://doi.org/10.18632/aging.102355>  
PMID:[31586989](https://pubmed.ncbi.nlm.nih.gov/31586989/)

**Mikhail V. Blagosklonny:** Cell Stress Biology, Roswell Park Cancer Institute, Elm and Carlton Street, Buffalo, NY 14263 USA

**Correspondence:** Mikhail V. Blagosklonny

**Email:** [blagosklonny@oncotarget.com](mailto:blagosklonny@oncotarget.com)

[blagosklonny@rapalogs.com](mailto:blagosklonny@rapalogs.com)

**Twitter:** @Blagosklonny

**Keywords:** rapamycin, mTOR, cream, topical, anti-aging, cosmetics, patents

**Conflict of Interests:** The author declares no conflicts of interest

**Patent Application Publication:**

<https://patents.google.com/patent/WO2008022256A2/en>

**Copyright:** Blagosklonny. This is an open-access article distributed under the terms of the Creative Commons Attribution License (CC BY 3.0), which permits unrestricted use, distribution, and reproduction in any medium, provided the original author and source are credited

**Received:** December 18, 2019

**Published:** December 27, 2019



## Disease or not, aging is easily treatable

Mikhail V. Blagosklonny<sup>1</sup>

<sup>1</sup>Cell Stress Biology, Roswell Park Cancer Institute, Buffalo, NY 14263, USA

**Correspondence to:** Mikhail V. Blagosklonny; **email:** [mikhail.blagosklonny@roswellpark.org](mailto:mikhail.blagosklonny@roswellpark.org)

**Keywords:** gerosuppressants, senolytics, longevity, lifespan

**Received:** August 15, 2018

**Accepted:** November 2, 2018

**Published:** November 17, 2018

**Copyright:** Blagosklonny. This is an open-access article distributed under the terms of the Creative Commons Attribution License (CC BY 3.0), which permits unrestricted use, distribution, and reproduction in any medium, provided the original author and source are credited.

### ABSTRACT

**Is aging a disease? It does not matter because aging is already treated using a combination of several clinically-available drugs, including rapamycin. Whether aging is a disease depends on arbitrary definitions of both disease and aging. For treatment purposes, aging is a deadly disease (or more generally, pre-disease), despite being a normal continuation of normal organismal growth. It must and, importantly, can be successfully treated, thereby delaying classic age-related diseases such as cancer, cardiovascular and metabolic diseases, and neurodegeneration.**

### Endless debate on aging and disease

For decades, one of the most debated questions in gerontology was whether aging is a disease or the norm. At present, excellent reasoning suggests aging should be defined as a disease [1-7]. I tend to define aging a disease, even though it is the norm. Vladimir Dilman referred to aging as “normal disease” [8, 9].

As I emphasized in my publications, aging is not programmed. I have explicitly stated as such even in my article titled “Aging is not programmed: genetic pseudo-program a shadow of development growth” (PMID: 24240128). Aging is a normal continuation of the normal developmental program, so it is NOT a program but a purposeless, unintended quasi-program [10-16]. Yet, aging is also a deadly disease because it inevitably leads to death.

Indeed, aging is “the sum of all age-related diseases” and this “sum is the best biomarker of aging” [17]. Aging and its diseases are inseparable, as these diseases are manifestations of aging. Of course, any one age-related disease can occur at a young age due to genetic and environmental factors. What is important is that aging is sufficient to cause all age-related diseases,

sooner or later, without dependence on genetic or environmental factors [18]: if Alzheimer’s disease or type 2 diabetes is not diagnosed during one’s life time, it is only because cancer or a stroke terminates life before

Alzheimer’s diseases or type 2 diabetes can be diagnosed (and vice versa).

### Aging is the sum of pre-diseases and diseases

Aging is an increase in the probability of death due to age-related diseases, which are late manifestations of aging [18]. Diseases are preceded by pre-diseases. For example, diabetes is diagnosed when fasting glucose levels are higher than 125 mg/dl, while levels of 100 to 125 mg/dl are considered pre-diabetes. Remarkably, diabetic complications such as nephropathy and retinopathy often develop before type 2 diabetes itself (see for references [19]). Although not formally a disease, pre-diabetes is currently treated to prevent diabetes [20-23]. Moreover, pre-diabetes is initiated by underlying processes that we will call pre-pre-diabetes, which arise while fasting glucose levels and glucose tolerance are still normal, though insulin levels are increased (hyperinsulinemia), indicating mild insulin resistance [24]. Hyperinsulinemia in healthy adults with normal glucose levels is predictive of type 2 diabetes

over a 24-year follow-up [25, 26]. Normal glucose levels (<100 mg/dl) associated with hyperinsulinemia is pre-pre-diabetes [27]. Hyperinsulinemia may in turn be driven by mTOR signaling [19], which suggests a state of pre-pre-pre-diabetes in which both glucose and insulin levels are normal. The condition that we can call pre-pre-diabetes is associated with future diabetes, cardiovascular disease and the all cause mortality rate [28]. Preventive treatment with metformin has been initiated during these very early disease stages in obese adolescents [29].

Another example is hypertension (a disease), which is defined arbitrarily as blood pressure (BP) above 140/90 mmHg. Pre-hypertension (or borderline hypertension) is defined as BP below 140/90 mmHg but higher than 120/80 mmHg. BP tends to increase with age, and those whose BP has not yet reached 140/90 (disease), or even 120/80 (pre-disease), may still have higher BP than they did when they were younger [30]. Mortality is associated with BP, even if it is lower than 140/90 [31]. Both pre-hypertension and pre-diabetes are age-related pre-diseases. Likewise, the asymptomatic stages of Alzheimer's disease are also pre-disease.

In pre-diseases, abnormalities have not reached the arbitrary diagnostic criteria of the diseases. So, aging consists of progression from (pre)-pre-diseases (early aging) to diseases (late aging associated with functional decline). Aging is NOT a risk factor for these diseases, as aging consists of these diseases: aging and diseases are inseparable (Figure 1).

An aged appearance (e.g., grey hair, wrinkles, cushin-goid body types and loss of muscles) are manifestations of pre-diseases. For example, an aged appearance may reflect hypercortisolism, sarcopenia, osteoporosis, skin pre-diseases and so on. And age-related skin lesions may herald pre-cancerous skin conditions [32].

## What is “healthy” aging?

What then is aging without diseases, so called “healthy” aging. “Healthy” aging has been called subclinical aging [33], slow aging [18, 34] or decelerated aging [35], during which diseases are at the pre-disease or even pre-pre-disease stage. Diseases will spring up eventually. “Healthy” aging is a pre-disease state in which asymptomatic abnormalities have not yet reached the artificial definitions of diseases such as hypertension or diabetes. Instead of healthy aging, we could use the terms pre-disease aging or decelerated aging. Furthermore, decelerated aging can be achieved pharmacologically. For example, rapamycin decelerates aging, thereby making one healthier [36, 37].

Currently, the term healthspan lacks clarity and precision especially in animals [38]. Although the duration of healthspan depends on arbitrary criteria and subjective self-rating, it is a useful abstraction. In theory, a treatment that slows aging increases both healthspan (subclinical period) and lifespan, whereas a treatment that increases lifespan (e.g., coronary bypass, defibrillation) is not necessarily increase healthspan (Figure 1 in reference [33]). The goal of both anti-aging therapies and preventive medicine is to extend healthspan (by preventing diseases), thus extending total lifespan.

## Preventive medicine: a step towards anti-aging medicine

Aging is the sum of diseases and pre-diseases. Treatments are generally more effective at pre-disease stages, associated with hyper-function, than at disease stages, associated with functional decline. As discussed in 2006, “rapamycin will prevent diseases rather than cure complications of diseases. For example, rapamycin

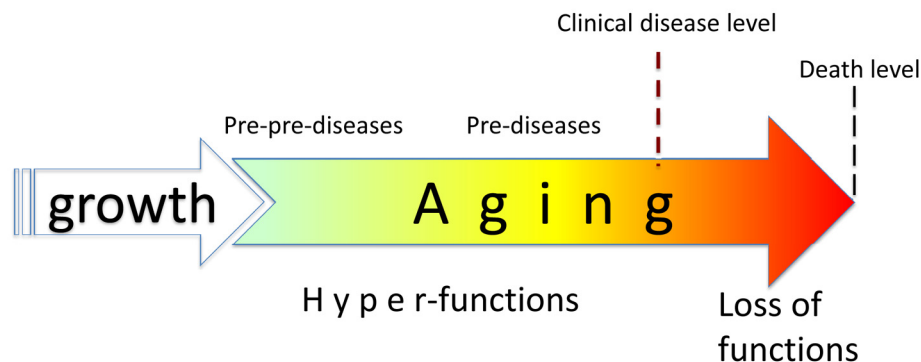

**Figure 1. Relationship between aging and diseases.** When growth is completed, growth-promoting pathways increase cellular and systemic functions and thus drive aging. This is a pre-pre-disease stage, slowly progressing to a pre-disease stage. Eventually, alterations reach clinical disease definition, associated with organ damage, loss of functions (functional decline), rapid deterioration and death.

will not repair broken bones but might prevent osteoporosis.” [10]. In fact, rapamycin prevents osteoporosis [39].

The goal of preventive medicine is to prevent diseases by treating pre-diseases. Thus, preventive medicine is a form of anti-aging therapy. Both preventive medicine and anti-aging therapy should prevent pre-diseases by treating “healthy” individuals. Some of the drugs used in preventive medicine include statins, aspirin, ACE inhibitors (e.g., lisinopril) and metformin, which can be repurposed as anti-aging drugs [40, 41]. And *vice versa*, rapamycin, an anti-aging drug, may become a cornerstone of preventive medicine. As David Gems put it, “anti-aging treatment is any preventative approach to reduce late-life pathology. Its adoption would facilitate translation, since it would shift the emphasis to medical practice, particularly the introduction of preventative approaches.” [42].

### To treat what is treatable

The fact that aging is an obligatory part of the life of all organisms is not important. What is important is that aging is deadly and, most importantly, treatable. Consider an analogy. Is facial hair (beard) in males a disease? No of course, not. Still most men shave it, effectively “treating” this non-disease, simply because it is easily treatable. Is presbyopia (blurred near vision) a disease? It occurs in everyone by the age of 50 and is a continuation of developmental trends in the eye. It is treated as a disease because it is easily treatable with eye glasses. Unlike presbyopia, menopause in females is not usually treated because it is not easy to treat. Thus, the decision to treat or not to treat is often determined by whether it is possible to treat. It does not matter whether or not the target of treatment is called a disease.

### Aging is treatable

As the simplest example, calorie restriction (CR) slows aging in diverse organisms, including primates [43-50]. Similarly, intermittent fasting (IF) and ketogenic diet (severe carbohydrate restriction) extend life span in mammals [48, 51-54]. CR (as well as carbohydrate restriction and IF fasting) improves health in humans [45, 48, 53, 55-62]. However, CR is unpleasant to most humans and its life-extending capacity is limited. Nutrients activate the mTOR (molecular Target of Rapamycin) nutrient-sensing pathway [63-65] and, as we will discuss mTOR drives aging, inhabitable by rapamycin. Rapamycin-based anti-aging therapies have been recently implemented by Dr. Alan Green (<https://rapamycintherapy.com>).

### Rapamycin and other rapalogs

Rapamycin (Rapamune/Sirolimus), an allosteric inhibitor of mTOR complex 1 [63, 66], is a natural rapalog as well as the most potent and best studied rapalog. Rapamycin-analogs such as everolimus, temsirolimus (a rapamycin prodrug) and deforolimus/Ridaforolimus are also now widely used.

Rapamycin, everolimus and deforolimus slow geroconversion [67-75]. It has been predicted that rapamycin would slow aging in mammals [10, 76]. Starting in 2009, numerous studies have demonstrated that rapamycin prolongs life in mice [75, 77-99], even when started late in life [77, 78, 97-99], or administered transiently or intermittently [77, 88, 89, 95].

In these studies, rapamycin was most effective at high doses [88, 89, 93-96, 100-103]. Its effect and that of everolimus lingers after their discontinuation [104], even after a single dose [105]. What appears to be important is to reach high peak levels using a single high dose [93, 94].

In non-human primates, chronic and/or intermittent rapamycin improves metabolic functioning [106]. In a randomized controlled trial, middle-aged companion dogs administered rapamycin exhibited no further side effects as compared to dogs receiving the placebo [107].

Millions of patients with various diseases and conditions (e.g., organ transplant recipients) have been treated with rapamycin (Sirolimus). Typical dose of rapamycin in organ-transplant patients is 2 mg/day. Rapamycin in a single dose of 15 mg was administered to healthy volunteers without adverse effects [108]. Similarly, a dose of 8 mg/m<sup>2</sup> (around 16 mg) was also well tolerated in healthy male volunteers [109]. What is amazing is that the placebo group reported more “side effects” such as asthenia than did the rapamycin group [109]. In yet another study, comparison to placebo revealed no real everolimus-induced side effects in the elderly [104]. Moreover, everolimus improves immunity [110] and reduces infections in elderly healthy humans [104]. In placebo-controlled studies, side effects of rapamycin and everolimus are manageable with dose reduction and interruption. Discontinuation due to toxicity was uncommon [111]. In volunteers (aged 70-95 years, mean age of 80 years), treatment with 1mg/daily of rapamycin for 8 weeks was safe [112]. Matt Kaeberlein suggests that conventional doses of rapamycin maybe sub-optimal for maximum life-extension [113]. I agree with this opinion.

## Conventional drugs as anti-aging drugs

Metformin is used not only to treat diabetes but also pre-diabetes in order to prevent diabetes [20-23]. Metformin decreases insulin-resistance and body weight and prevents diabetes, cancer and cardiovascular disease [21, 22, 114-119]. It is expected that metformin would extend life and, in fact, metformin does decrease all-cause mortality [119, 120]. Physicians generally do not think of metformin as an anti-aging drug, simply because it is expected that life will be extended, if diseases are prevented. In mice, metformin extends healthspan and lifespan [117, 121-123]. It also extends the lifespan of *C. elegans* [124-127], which do not suffer from human diseases. Gerontologists think of metformin as an anti-aging drug [121-130], and metformin can be combined with rapamycin [131].

## Angiotensin II inhibitors

Angiotensin-converting enzyme (ACE) inhibitors (e.g., Captopril, Lisinopril, Enalapril, Ramipril) and Angiotensin II receptor blockers (ARB) (e.g., Valsartan, Telmisartan, Losartan) are widely used to treat hypertension, which is a typical hyperfunctional disease. Vasoconstriction, cardiomyocyte hypertrophy, beta- and alpha- adrenergic hyperstimulation all lead to high blood pressure (systemic hyperfunction), which, in turn can contribute to stroke, myocardial infarction and renal failure. ACE inhibitors and ARBs decrease vasoconstriction and prevent cardiac hypertrophy. They are life-extending drugs because they treat deadly diseases.

Notably, ACE inhibitors increase the lifespan in rodents with normal blood pressure [132-134], thereby acting as anti-aging drugs.

## Combinations of conventional drugs

Combinations of aspirin, statins, beta-blockers and ACE inhibitors are given to aging individuals to prevent cardiovascular diseases [135]. On the other hand, these drugs extend life span in rodents and *Drosophila* [136].

Typical combinations (polypill) include an antiplatelet agent (aspirin), a statin and two blood pressure-lowering drugs such as lisinopril and a beta-blocker [137,138]. Such combinations are estimated to reduce the 5-year incidence of stroke by 50% [139]. Aspirin, statins, ACE inhibitors, beta-blockers and metformin prevent some types of cancer and pre-cancerous polyps [116-118, 140-146].

## Treating aging by preventing diseases or preventing diseases by slowing aging

As discussed, “aging is the sum of all age-related diseases” and this “sum is the best biomarker of aging” [17]. One could say that drugs prevent diseases by slowing aging. Alternatively, it could be said that prevention of diseases slows aging, which is the sum of all diseases and pre-diseases. If a drug prevents diseases, it will extend lifespan (apparently slowing down aging). If a drug slows down aging it will prevent diseases and extend healthspan [17, 147].

As suggested “narrow spectrum anti-aging treatments (e.g. the cardiovascular polypill) could establish a practice that eventually extends to broader spectrum anti-aging treatments (e.g. dietary restriction mimetics)”. [42].

## CONCLUSION

It is commonly argued that aging should be defined as a disease so as to accelerate development of anti-aging therapies. This attitude is self-defeating because it allows us to postpone development of anti-aging therapies until aging is pronounced a disease by regulatory bodies, which will not happen soon. Aging does not need to be defined as a disease to be treated. Anti-aging drugs such as rapamycin delay age-related diseases. If a drug does not delay progression of at least one age-related disease, it cannot possibly be considered as an anti-aging drug, because it will not extend lifespan by definition (animals die from age-related diseases). It has been suggested [17], “in order to extend life span, an anti-aging drug must delay age-related diseases. ... Once a drug is used for treatment of any one chronic disease, its effect against other diseases ... may be evaluated in the same group of patients.” Aging can be treated as a pre-disease to prevent its progression to diseases. Rapamycin-based combinations include conventional life-extending drugs, which are used to treat and prevent age-related diseases. These combinations could be combined with modestly low-calorie/carbohydrates diet, physical exercise and stress avoidance [40, 41]. And this approach is actually being used now to treat aging at Alan Green’s clinic in Little Neck, NY:

<http://roguehealthandfitness.com/rapamycin-anti-aging-medicine-an-interview-with-alan-s-green-m-d/?print=pdf> and <https://rapamycintherapy.com>

## CONFLICTS OF INTEREST

The author declares no conflicts of interest. The author did not participate in Editorial process.



## REFERENCES

- Bulterijs S, Hull RS, Björk VC, Roy AG. It is time to classify biological aging as a disease. *Front Genet.* 2015; 6:205. <https://doi.org/10.3389/fgene.2015.00205>
- Caplan AL. Death as an unnatural process. Why is it wrong to seek a cure for aging? *EMBO Rep.* 2005; 6:S72–75. <https://doi.org/10.1038/sj.embor.7400435>
- Gems D. The aging-disease false dichotomy: understanding senescence as pathology. *Front Genet.* 2015; 6:212. <https://doi.org/10.3389/fgene.2015.00212>
- Zhavoronkov A, Bhullar B. Classifying aging as a disease in the context of ICD-11. *Front Genet.* 2015; 6:326. <https://doi.org/10.3389/fgene.2015.00326>
- Stambler I. Recognizing Degenerative Aging as a Treatable Medical Condition: methodology and Policy. *Aging Dis.* 2017; 8:583–89. <https://doi.org/10.14336/AD.2017.0130>
- Stambler I. Has aging ever been considered healthy? *Front Genet.* 2015; 6:202. <https://doi.org/10.3389/fgene.2015.00202>
- Faragher RG. Should we treat aging as a disease? The consequences and dangers of miscategorisation. *Front Genet.* 2015; 6:171. <https://doi.org/10.3389/fgene.2015.00171>
- Dilman VM, Revskoy SY, Golubev AG. Neuroendocrine-ontogenetic mechanism of aging: toward an integrated theory of aging. *Int Rev Neurobiol.* 1986; 28:89–156. [https://doi.org/10.1016/S0074-7742\(08\)60107-5](https://doi.org/10.1016/S0074-7742(08)60107-5)
- Dilman VM. Four models of medicine. *Medicina: Leningrad* 1987.
- Blagosklonny MV. Aging and immortality: quasi-programmed senescence and its pharmacologic inhibition. *Cell Cycle.* 2006; 5:2087–102. <https://doi.org/10.4161/cc.5.18.3288>
- Blagosklonny MV. Revisiting the antagonistic pleiotropy theory of aging: TOR-driven program and quasi-program. *Cell Cycle.* 2010; 9:3151–56. <https://doi.org/10.4161/cc.9.16.13120>
- Blagosklonny MV. Aging is not programmed: genetic pseudo-program is a shadow of developmental growth. *Cell Cycle.* 2013; 12:3736–42. <https://doi.org/10.4161/cc.27188>
- Gems D, Partridge L. Genetics of longevity in model organisms: debates and paradigm shifts. *Annu Rev Physiol.* 2013; 75:621–44. <https://doi.org/10.1146/annurev-physiol-030212-183712>
- Gems D, de la Guardia Y. Alternative Perspectives on Aging in *Caenorhabditis elegans*: Reactive Oxygen Species or Hyperfunction? *Antioxid Redox Signal.* 2013; 19:321–29. <https://doi.org/10.1089/ars.2012.4840>
- Wang H, Zhao Y, Ezcurra M, Benedetto A, Gilliat AF, Hellberg J, Ren Z, Galimov ER, Athigapanich T, Girstmair J, Telford MJ, Dolphin CT, Zhang Z, Gems D. A parthenogenetic quasi-program causes teratoma-like tumors during aging in wild-type *C. elegans*. *NPJ Aging Mech Dis.* 2018; 4:6. <https://doi.org/10.1038/s41514-018-0025-3>
- Wang H, Zhang Z, Gems D. Monsters in the uterus: teratoma-like tumors in senescent *C. elegans* result from a parthenogenetic quasi-program. *Aging (Albany NY).* 2018; 10:1188–89. <https://doi.org/10.18632/aging.101486>
- Blagosklonny MV. Validation of anti-aging drugs by treating age-related diseases. *Aging (Albany NY).* 2009; 1:281–88. <https://doi.org/10.18632/aging.100034>
- Blagosklonny MV. Answering the ultimate question “what is the proximal cause of aging?”. *Aging (Albany NY).* 2012; 4:861–77. <https://doi.org/10.18632/aging.100525>
- Blagosklonny MV. TOR-centric view on insulin resistance and diabetic complications: perspective for endocrinologists and gerontologists. *Cell Death Dis.* 2013; 4:e964. <https://doi.org/10.1038/cddis.2013.506>
- Hostalek U, Gwilt M, Hildemann S. Therapeutic Use of Metformin in Prediabetes and Diabetes Prevention. *Drugs.* 2015; 75:1071–94. <https://doi.org/10.1007/s40265-015-0416-8>
- Diabetes Prevention Program Research Group. Long-term safety, tolerability, and weight loss associated with metformin in the Diabetes Prevention Program Outcomes Study. *Diabetes Care.* 2012; 35:731–37. <https://doi.org/10.2337/dc11-1299>
- Aroda VR, Knowler WC, Crandall JP, Perreault L, Edelstein SL, Jeffries SL, Molitch ME, Pi-Sunyer X, Darwin C, Heckman-Stoddard BM, Tempresa M, Kahn SE, Nathan DM, and Diabetes Prevention Program Research Group. Metformin for diabetes prevention: insights gained from the Diabetes Prevention Program/Diabetes Prevention Program Outcomes Study. *Diabetologia.* 2017; 60:1601–11. <https://doi.org/10.1007/s00125-017-4361-9>



23. Diabetes Prevention Program Research Group. Long-term effects of lifestyle intervention or metformin on diabetes development and microvascular complications over 15-year follow-up: the Diabetes Prevention Program Outcomes Study. *Lancet Diabetes Endocrinol*. 2015; 3:866–75. [https://doi.org/10.1016/S2213-8587\(15\)00291-0](https://doi.org/10.1016/S2213-8587(15)00291-0)
24. Færch K, Vistisen D, Pacini G, Torekov SS, Johansen NB, Witte DR, Jonsson A, Pedersen O, Hansen T, Lauritzen T, Jørgensen ME, Ahrén B, Holst JJ. Insulin Resistance Is Accompanied by Increased Fasting Glucagon and Delayed Glucagon Suppression in Individuals With Normal and Impaired Glucose Regulation. *Diabetes*. 2016; 65:3473–81. <https://doi.org/10.2337/db16-0240>
25. Dankner R, Chetrit A, Shanik MH, Raz I, Roth J. Basal-state hyperinsulinemia in healthy normoglycemic adults is predictive of type 2 diabetes over a 24-year follow-up: a preliminary report. *Diabetes Care*. 2009; 32:1464–66. <https://doi.org/10.2337/dc09-0153>
26. Dankner R, Chetrit A, Shanik MH, Raz I, Roth J. Basal state hyperinsulinemia in healthy normoglycemic adults heralds dysglycemia after more than two decades of follow up. *Diabetes Metab Res Rev*. 2012; 28:618–24. <https://doi.org/10.1002/dmrr.2322>
27. Weir GC, Bonner-Weir S. Five stages of evolving beta-cell dysfunction during progression to diabetes. *Diabetes*. 2004 (Suppl 3); 53:S16–21. [https://doi.org/10.2337/diabetes.53.suppl\\_3.S16](https://doi.org/10.2337/diabetes.53.suppl_3.S16)
28. Hulman A, Vistisen D, Glümer C, Bergman M, Witte DR, Færch K. Glucose patterns during an oral glucose tolerance test and associations with future diabetes, cardiovascular disease and all-cause mortality rate. *Diabetologia*. 2018; 61:101–07. <https://doi.org/10.1007/s00125-017-4468-z>
29. Freemark M, Bursey D. The effects of metformin on body mass index and glucose tolerance in obese adolescents with fasting hyperinsulinemia and a family history of type 2 diabetes. *Pediatrics*. 2001; 107:E55. <https://doi.org/10.1542/peds.107.4.e55>
30. Chobanian AV, Bakris GL, Black HR, Cushman WC, Green LA, Izzo JL Jr, Jones DW, Materson BJ, Oparil S, Wright JT Jr, Rocella EJ. National Heart, Lung, and Blood Institute Joint National Committee on Prevention, Detection, Evaluation, and Treatment of High Blood Pressure, and National High Blood Pressure Education Program Coordinating Committee. The Seventh Report of the Joint National Committee on Prevention, Detection, Evaluation, and Treatment of High Blood Pressure: the JNC 7 report. *JAMA*. 2003; 289:2560–72. <https://doi.org/10.1001/jama.289.19.2560>
31. Huang Y, Su L, Cai X, Mai W, Wang S, Hu Y, Wu Y, Tang H, Xu D. Association of all-cause and cardiovascular mortality with prehypertension: a meta-analysis. *Am Heart J*. 2014; 167:160–168.e1. <https://doi.org/10.1016/j.ahj.2013.10.023>
32. Ollstein RN. Skin lesions in the elderly: precancer and cancer. *Care Manag J*. 2004; 5:107–11. <https://doi.org/10.1891/cmaj.5.2.107.66279>
33. Blagosklonny MV. How to save Medicare: the anti-aging remedy. *Aging (Albany NY)*. 2012; 4:547–52. <https://doi.org/10.18632/aging.100479>
34. Blagosklonny MV. Why human lifespan is rapidly increasing: solving “longevity riddle” with “revealed-slow-aging” hypothesis. *Aging (Albany NY)*. 2010; 2:177–82. <https://doi.org/10.18632/aging.100139>
35. Franceschi C, Garagnani P, Morsiani C, Conte M, Santoro A, Grignolio A, Monti D, Capri M, Salvioli S. The Continuum of Aging and Age-Related Diseases: Common Mechanisms but Different Rates. *Front Med (Lausanne)*. 2018; 5:61. <https://doi.org/10.3389/fmed.2018.00061>
36. Blagosklonny MV. Rapamycin extends life- and health span because it slows aging. *Aging (Albany NY)*. 2013; 5:592–98. <https://doi.org/10.18632/aging.100591>
37. Kaeberlein M. The Biology of Aging: Citizen Scientists and Their Pets as a Bridge Between Research on Model Organisms and Human Subjects. *Vet Pathol*. 2016; 53:291–98. <https://doi.org/10.1177/0300985815591082>
38. Kaeberlein M. How healthy is the healthspan concept? *Geroscience*. 2018; 40:361–64. <https://doi.org/10.1007/s11357-018-0036-9>
39. Luo D, Ren H, Li T, Lian K, Lin D. Rapamycin reduces severity of senile osteoporosis by activating osteocyte autophagy. *Osteoporos Int*. 2016; 27:1093–101. <https://doi.org/10.1007/s00198-015-3325-5>
40. Blagosklonny MV. Koschei the immortal and anti-aging drugs. *Cell Death Dis*. 2014; 5:e1552. <https://doi.org/10.1038/cddis.2014.520>
41. Blagosklonny MV. From rapalogs to anti-aging formula. *Oncotarget*. 2017; 8:35492–507. <https://doi.org/10.18632/oncotarget.18033>
42. Gems D. What is an anti-aging treatment? *Exp Gerontol*. 2014; 58:14–18. <https://doi.org/10.1016/j.exger.2014.07.003>
43. Colman RJ, Anderson RM, Johnson SC, Kastman EK, Kosmatka KJ, Beasley TM, Allison DB, Cruzen C, Simmons HA, Kemnitz JW, Weindruch R. Caloric restriction delays disease onset and mortality in rhesus monkeys. *Science*. 2009; 325:201–04.

<https://doi.org/10.1126/science.1173635>

44. Blagosklonny MV. Calorie restriction: decelerating mTOR-driven aging from cells to organisms (including humans). *Cell Cycle*. 2010; 9:683–88. <https://doi.org/10.4161/cc.9.4.10766>
45. Cava E, Fontana L. Will calorie restriction work in humans? *Aging (Albany NY)*. 2013; 5:507–14. <https://doi.org/10.18632/aging.100581>
46. Mercken EM, Carboneau BA, Krzysik-Walker SM, de Cabo R. Of mice and men: the benefits of caloric restriction, exercise, and mimetics. *Ageing Res Rev*. 2012; 11:390–98. <https://doi.org/10.1016/j.arr.2011.11.005>
47. Colman RJ, Beasley TM, Kemnitz JW, Johnson SC, Weindruch R, Anderson RM. Caloric restriction reduces age-related and all-cause mortality in rhesus monkeys. *Nat Commun*. 2014; 5:3557. <https://doi.org/10.1038/ncomms4557>
48. Trepanowski JF, Canale RE, Marshall KE, Kabir MM, Bloomer RJ. Impact of caloric and dietary restriction regimens on markers of health and longevity in humans and animals: a summary of available findings. *Nutr J*. 2011; 10:107. <https://doi.org/10.1186/1475-2891-10-107>
49. Testa G, Biasi F, Poli G, Chiarpotto E. Calorie restriction and dietary restriction mimetics: a strategy for improving healthy aging and longevity. *Curr Pharm Des*. 2014; 20:2950–77. <https://doi.org/10.2174/13816128113196660699>
50. Ingram DK, Roth GS. Calorie restriction mimetics: can you have your cake and eat it, too? *Ageing Res Rev*. 2015; 20:46–62. <https://doi.org/10.1016/j.arr.2014.11.005>
51. Mattson MP, Moehl K, Ghena N, Schmaedick M, Cheng A. Intermittent metabolic switching, neuroplasticity and brain health. *Nat Rev Neurosci*. 2018; 19:63–80. <https://doi.org/10.1038/nrn.2017.156>
52. Mattson MP, Longo VD, Harvie M. Impact of intermittent fasting on health and disease processes. *Ageing Res Rev*. 2017; 39:46–58. <https://doi.org/10.1016/j.arr.2016.10.005>
53. Xie K, Neff F, Markert A, Rozman J, Aguilar-Pimentel JA, Amarie OV, Becker L, Brommage R, Garrett L, Henzel KS, Höltter SM, Janik D, Lehmann I, et al. Every-other-day feeding extends lifespan but fails to delay many symptoms of aging in mice. *Nat Commun*. 2017; 8:155. <https://doi.org/10.1038/s41467-017-00178-3>
54. Roberts MN, Wallace MA, Tomilov AA, Zhou Z, Marcotte GR, Tran D, Perez G, Gutierrez-Casado E, Koike S, Knotts TA, Imai DM, Griffey SM, Kim K, et al. A Ketogenic Diet Extends Longevity and Healthspan in Adult Mice. *Cell Metab*. 2017; 26:539–546.e5. <https://doi.org/10.1016/j.cmet.2017.08.005>
55. Most J, Tosti V, Redman LM, Fontana L. Calorie restriction in humans: an update. *Ageing Res Rev*. 2017; 39:36–45. <https://doi.org/10.1016/j.arr.2016.08.005>
56. Omodei D, Fontana L. Calorie restriction and prevention of age-associated chronic disease. *FEBS Lett*. 2011; 585:1537–42. <https://doi.org/10.1016/j.febslet.2011.03.015>
57. Lefevre M, Redman LM, Heilbronn LK, Smith JV, Martin CK, Rood JC, Greenway FL, Williamson DA, Smith SR, Ravussin E and team. fPC. Caloric restriction alone and with exercise improves CVD risk in healthy non-obese individuals. *Atherosclerosis*. 2009; 203:206–13. <https://doi.org/10.1016/j.atherosclerosis.2008.05.036>
58. Fontana L, Klein S, Holloszy JO. Effects of long-term calorie restriction and endurance exercise on glucose tolerance, insulin action, and adipokine production. *Age (Dordr)*. 2010; 32:97–108. <https://doi.org/10.1007/s11357-009-9118-z>
59. Lettieri-Barbato D, Giovannetti E, Aquilano K. Effects of dietary restriction on adipose mass and biomarkers of healthy aging in human. *Aging (Albany NY)*. 2016; 8:3341–55. <https://doi.org/10.18632/aging.101122>
60. Mattson MP, Wan R. Beneficial effects of intermittent fasting and caloric restriction on the cardiovascular and cerebrovascular systems. *J Nutr Biochem*. 2005; 16:129–37. <https://doi.org/10.1016/j.jnutbio.2004.12.007>
61. Daly ME, Paisey R, Paisey R, Millward BA, Eccles C, Williams K, Hammersley S, MacLeod KM, Gale TJ. Short-term effects of severe dietary carbohydrate-restriction advice in Type 2 diabetes—a randomized controlled trial. *Diabet Med*. 2006; 23:15–20. <https://doi.org/10.1111/j.1464-5491.2005.01760.x>
62. Longo VD, Panda S. Fasting, Circadian Rhythms, and Time-Restricted Feeding in Healthy Lifespan. *Cell Metab*. 2016; 23:1048–59. <https://doi.org/10.1016/j.cmet.2016.06.001>
63. Wolfson RL, Sabatini DM. The Dawn of the Age of Amino Acid Sensors for the mTORC1 Pathway. *Cell Metab*. 2017; 26:301–09. <https://doi.org/10.1016/j.cmet.2017.07.001>
64. Shimobayashi M, Hall MN. Multiple amino acid sensing inputs to mTORC1. *Cell Res*. 2016; 26:7–20. <https://doi.org/10.1038/cr.2015.146>

65. Jewell JL, Guan KL. Nutrient signaling to mTOR and cell growth. *Trends Biochem Sci.* 2013; 38:233–42. <https://doi.org/10.1016/j.tibs.2013.01.004>
66. Thoreen CC, Kang SA, Chang JW, Liu Q, Zhang J, Gao Y, Reichling LJ, Sim T, Sabatini DM, Gray NS. An ATP-competitive mammalian target of rapamycin inhibitor reveals rapamycin-resistant functions of mTORC1. *J Biol Chem.* 2009; 284:8023–32. <https://doi.org/10.1074/jbc.M900301200>
67. Demidenko ZN, Blagosklonny MV. Growth stimulation leads to cellular senescence when the cell cycle is blocked. *Cell Cycle.* 2008; 7:3355–61. <https://doi.org/10.4161/cc.7.21.6919>
68. Iglesias-Bartolome R, Patel V, Cotrim A, Leelahavanichkul K, Molinolo AA, Mitchell JB, Gutkind JS. mTOR inhibition prevents epithelial stem cell senescence and protects from radiation-induced mucositis. *Cell Stem Cell.* 2012; 11:401–14. <https://doi.org/10.1016/j.stem.2012.06.007>
69. Kolesnichenko M, Hong L, Liao R, Vogt PK, Sun P. Attenuation of TORC1 signaling delays replicative and oncogenic RAS-induced senescence. *Cell Cycle.* 2012; 11:2391–401. <https://doi.org/10.4161/cc.20683>
70. Leontieva OV, Demidenko ZN, Blagosklonny MV. Contact inhibition and high cell density deactivate the mammalian target of rapamycin pathway, thus suppressing the senescence program. *Proc Natl Acad Sci USA.* 2014; 111:8832–37. <https://doi.org/10.1073/pnas.1405723111>
71. Leontieva OV, Blagosklonny MV. Gerosuppression by pan-mTOR inhibitors. *Aging (Albany NY).* 2016; 8:3535–51. <https://doi.org/10.18632/aging.101155>
72. Walters HE, Deneka-Hannemann S, Cox LS. Reversal of phenotypes of cellular senescence by pan-mTOR inhibition. *Aging (Albany NY).* 2016; 8:231–44. <https://doi.org/10.18632/aging.100872>
73. Wang R, Yu Z, Sunchu B, Shoaf J, Dang I, Zhao S, Caples K, Bradley L, Beaver LM, Ho E, Löhr CV, Perez VI. Rapamycin inhibits the secretory phenotype of senescent cells by a Nrf2-independent mechanism. *Aging Cell.* 2017; 16:564–74. <https://doi.org/10.1111/acer.12587>
74. Laberge RM, Sun Y, Orjalo AV, Patil CK, Freund A, Zhou L, Curran SC, Davalos AR, Wilson-Edell KA, Liu S, Limbad C, Demaria M, Li P, et al. MTOR regulates the pro-tumorigenic senescence-associated secretory phenotype by promoting IL1A translation. *Nat Cell Biol.* 2015; 17:1049–61. <https://doi.org/10.1038/ncb3195>
75. Christy B, Demaria M, Campisi J, Huang J, Jones D, Dodds SG, Williams C, Hubbard G, Livi CB, Gao X, Weintraub S, Curiel T, Sharp ZD, Hasty P. p53 and rapamycin are additive. *Oncotarget.* 2015; 6:15802–13. <https://doi.org/10.18632/oncotarget.4602>
76. Blagosklonny MV. Rapamycin and quasi-programmed aging: four years later. *Cell Cycle.* 2010; 9:1859–62. <https://doi.org/10.4161/cc.9.10.11872>
77. Chen C, Liu Y, Liu Y, Zheng P. mTOR regulation and therapeutic rejuvenation of aging hematopoietic stem cells. *Sci Signal.* 2009; 2:ra75. <https://doi.org/10.1126/scisignal.2000559>
78. Harrison DE, Strong R, Sharp ZD, Nelson JF, Astle CM, Flurkey K, Nadon NL, Wilkinson JE, Frenkel K, Carter CS, Pahor M, Javors MA, Fernandez E, Miller RA. Rapamycin fed late in life extends lifespan in genetically heterogeneous mice. *Nature.* 2009; 460:392–95. <https://doi.org/10.1038/nature08221>
79. Anisimov VN, Zabezhinski MA, Popovich IG, Piskunova TS, Semchenko AV, Tyndyk ML, Yurova MN, Antoch MP, Blagosklonny MV. Rapamycin extends maximal lifespan in cancer-prone mice. *Am J Pathol.* 2010; 176:2092–97. <https://doi.org/10.2353/ajpath.2010.091050>
80. Anisimov VN, Zabezhinski MA, Popovich IG, Piskunova TS, Semchenko AV, Tyndyk ML, Yurova MN, Rosenfeld SV, Blagosklonny MV. Rapamycin increases lifespan and inhibits spontaneous tumorigenesis in inbred female mice. *Cell Cycle.* 2011; 10:4230–36. <https://doi.org/10.4161/cc.10.24.18486>
81. Miller RA, Harrison DE, Astle CM, Baur JA, Boyd AR, de Cabo R, Fernandez E, Flurkey K, Javors MA, Nelson JF, Orihuela CJ, Pletcher S, Sharp ZD, et al. Rapamycin, but not resveratrol or simvastatin, extends life span of genetically heterogeneous mice. *J Gerontol A Biol Sci Med Sci.* 2011; 66:191–201. <https://doi.org/10.1093/gerona/gdq178>
82. Wilkinson JE, Burmeister L, Brooks SV, Chan CC, Friedline S, Harrison DE, Hejtmancik JF, Nadon N, Strong R, Wood LK, Woodward MA, Miller RA. Rapamycin slows aging in mice. *Aging Cell.* 2012; 11:675–82. <https://doi.org/10.1111/j.1474-9726.2012.00832.x>
83. Comas M, Toshkov I, Kuropatwinski KK, Chernova OB, Polinsky A, Blagosklonny MV, Gudkov AV, Antoch MP. New nanoformulation of rapamycin Rapatar extends lifespan in homozygous p53<sup>-/-</sup> mice by delaying carcinogenesis. *Aging (Albany NY).* 2012; 4:715–22. <https://doi.org/10.18632/aging.100496>
84. Komarova EA, Antoch MP, Novototskaya LR, Chernova OB, Paszkiewicz G, Leontieva OV, Blagosklonny MV, Gudkov AV. Rapamycin extends lifespan and delays tumorigenesis in heterozygous p53<sup>+/+</sup> mice. *Aging (Albany NY).* 2012; 4:709–14.

<https://doi.org/10.18632/aging.100498>

85. Livi CB, Hardman RL, Christy BA, Dodds SG, Jones D, Williams C, Strong R, Bokov A, Javors MA, Ikeno Y, Hubbard G, Hasty P, Sharp ZD. Rapamycin extends life span of Rb1+/- mice by inhibiting neuroendocrine tumors. *Aging (Albany NY)*. 2013; 5:100–10. <https://doi.org/10.18632/aging.100533>
86. Neff F, Flores-Dominguez D, Ryan DP, Horsch M, Schröder S, Adler T, Afonso LC, Aguilar-Pimentel JA, Becker L, Garrett L, Hans W, Hettich MM, Holtmeier R, et al. Rapamycin extends murine lifespan but has limited effects on aging. *J Clin Invest*. 2013; 123:3272–91. <https://doi.org/10.1172/JCI67674>
87. Fok WC, Chen Y, Bokov A, Zhang Y, Salmon AB, Diaz V, Javors M, Wood WH 3rd, Zhang Y, Becker KG, Pérez VI, Richardson A. Mice fed rapamycin have an increase in lifespan associated with major changes in the liver transcriptome. *PLoS One*. 2014; 9:e83988. <https://doi.org/10.1371/journal.pone.0083988>
88. Leontieva OV, Paszkiewicz GM, Blagosklonny MV. Weekly administration of rapamycin improves survival and biomarkers in obese male mice on high-fat diet. *Aging Cell*. 2014; 13:616–22. <https://doi.org/10.1111/acer.12211>
89. Miller RA, Harrison DE, Astle CM, Fernandez E, Flurkey K, Han M, Javors MA, Li X, Nadon NL, Nelson JF, Pletcher S, Salmon AB, Sharp ZD, et al. Rapamycin-mediated lifespan increase in mice is dose and sex dependent and metabolically distinct from dietary restriction. *Aging Cell*. 2014; 13:468–77. <https://doi.org/10.1111/acer.12194>
90. Popovich IG, Anisimov VN, Zabezhinski MA, Semenchenko AV, Tyndyk ML, Yurova MN, Blagosklonny MV. Lifespan extension and cancer prevention in HER-2/neu transgenic mice treated with low intermittent doses of rapamycin. *Cancer Biol Ther*. 2014; 15:586–92. <https://doi.org/10.4161/cbt.28164>
91. Siegmund SE, Yang H, Sharma R, Javors M, Skinner O, Mootha V, Hirano M, Schon EA. Low-dose rapamycin extends lifespan in a mouse model of mtDNA depletion syndrome. *Hum Mol Genet*. 2017; 26:4588–605. <https://doi.org/10.1093/hmg/ddx341>
92. Khapre RV, Kondratova AA, Patel S, Dubrovsky Y, Wrobel M, Antoch MP, Kondratov RV. BMAL1-dependent regulation of the mTOR signaling pathway delays aging. *Aging (Albany NY)*. 2014; 6:48–57. <https://doi.org/10.18632/aging.100633>
93. Johnson SC, Yanos ME, Kayser EB, Quintana A, Sangesland M, Castanza A, Uhde L, Hui J, Wall VZ, Gagnidze A, Oh K, Wasko BM, Ramos FJ, et al. mTOR inhibition alleviates mitochondrial disease in a mouse model of Leigh syndrome. *Science*. 2013; 342:1524–28. <https://doi.org/10.1126/science.1244360>
94. Johnson SC, Yanos ME, Bitto A, Castanza A, Gagnidze A, Gonzalez B, Gupta K, Hui J, Jarvie C, Johnson BM, Letexier N, McCanta L, Sangesland M, et al. Dose-dependent effects of mTOR inhibition on weight and mitochondrial disease in mice. *Front Genet*. 2015; 6:247. <https://doi.org/10.3389/fgene.2015.00247>
95. Bitto A, Ito TK, Pineda VV, LeTexier NJ, Huang HZ, Sutlief E, Tung H, Vizzini N, Chen B, Smith K, Meza D, Yajima M, Beyer RP, et al. Transient rapamycin treatment can increase lifespan and healthspan in middle-aged mice. *eLife*. 2016; 5:5. <https://doi.org/10.7554/eLife.16351>
96. Johnson SC, Kaeberlein M. Rapamycin in aging and disease: maximizing efficacy while minimizing side effects. *Oncotarget*. 2016; 7:44876–78. <https://doi.org/10.18632/oncotarget.10381>
97. Flynn JM, O’Leary MN, Zambataro CA, Academia EC, Presley MP, Garrett BJ, Zykovich A, Mooney SD, Strong R, Rosen CJ, Kapahi P, Nelson MD, Kennedy BK, Melov S. Late-life rapamycin treatment reverses age-related heart dysfunction. *Aging Cell*. 2013; 12:851–62. <https://doi.org/10.1111/acer.12109>
98. Ye L, Widlund AL, Sims CA, Lammung DW, Guan Y, Davis JG, Sabatini DM, Harrison DE, Vang O, Baur JA. Rapamycin doses sufficient to extend lifespan do not compromise muscle mitochondrial content or endurance. *Aging (Albany NY)*. 2013; 5:539–50. <https://doi.org/10.18632/aging.100576>
99. Dai DF, Karunadharma PP, Chiao YA, Basisty N, Crispin D, Hsieh EJ, Chen T, Gu H, Djukovic D, Raftery D, Beyer RP, MacCoss MJ, Rabinovitch PS. Altered proteome turnover and remodeling by short-term caloric restriction or rapamycin rejuvenate the aging heart. *Aging Cell*. 2014; 13:529–39. <https://doi.org/10.1111/acer.12203>
100. Felici R, Buonvicino D, Muzzi M, Cavone L, Guasti D, Lapucci A, Pratesi S, De Cesaris F, Luceri F, Chiarugi A. Post onset, oral rapamycin treatment delays development of mitochondrial encephalopathy only at supramaximal doses. *Neuropharmacology*. 2017; 117:74–84. <https://doi.org/10.1016/j.neuropharm.2017.01.039>
101. Li A, Fan S, Xu Y, Meng J, Shen X, Mao J, Zhang L, Zhang X, Moeckel G, Wu D, Wu G, Liang C. Rapamycin treatment dose-dependently improves the cystic kidney in a new ADPKD mouse model via the mTORC1 and cell-cycle-associated CDK1/cyclin axis. *J Cell Mol Med*. 2017; 21:1619–35. <https://doi.org/10.1111/jcmm.13091>
102. Leontieva OV, Paszkiewicz GM, Blagosklonny MV.



- Comparison of rapamycin schedules in mice on high-fat diet. *Cell Cycle*. 2014; 13:3350–56.  
<https://doi.org/10.4161/15384101.2014.970491>
103. Leontieva OV, Paszkiewicz GM, Blagosklonny MV. Fasting levels of hepatic p-S6 are increased in old mice. *Cell Cycle*. 2014; 13:2656–59.  
<https://doi.org/10.4161/15384101.2014.949150>
  104. Mannick JB, Morris M, Hockey HP, Roma G, Beibel M, Kulmatycki K, Watkins M, Shavlakadze T, Zhou W, Quinn D, Glass DJ, Klickstein LB. TORC1 inhibition enhances immune function and reduces infections in the elderly. *Sci Transl Med*. 2018; 10:eaq1564.  
<https://doi.org/10.1126/scitranslmed.aq1564>
  105. Hebert M, Licursi M, Jensen B, Baker A, Milway S, Malsbury C, Grant VL, Adamec R, Hirasawa M, Blundell J. Single rapamycin administration induces prolonged downward shift in defended body weight in rats. *PLoS One*. 2014; 9:e93691.  
<https://doi.org/10.1371/journal.pone.0093691>
  106. Ross C, Salmon A, Strong R, Fernandez E, Javors M, Richardson A, Tardif S. Metabolic consequences of long-term rapamycin exposure on common marmoset monkeys (*Callithrix jacchus*). *Aging* (Albany NY). 2015; 7:964–73.  
<https://doi.org/10.18632/aging.100843>
  107. Urfer SR, Kaeberlein TL, Mailheau S, Bergman PJ, Creevy KE, Promislow DE, Kaeberlein M. A randomized controlled trial to establish effects of short-term rapamycin treatment in 24 middle-aged companion dogs. *Geroscience*. 2017; 39:117–27.  
<https://doi.org/10.1007/s11357-017-9972-z>
  108. Tortorici MA, Parks V, Matschke K, Korth-Bradley J, Patat A. The evaluation of potential pharmacokinetic interaction between sirolimus and tacrolimus in healthy volunteers. *Eur J Clin Pharmacol*. 2013; 69:835–42. <https://doi.org/10.1007/s00228-012-1407-2>
  109. Brattström C, Säwe J, Jansson B, Lönnebo A, Nordin J, Zimmerman JJ, Burke JT, Groth CG. Pharmacokinetics and safety of single oral doses of sirolimus (rapamycin) in healthy male volunteers. *Ther Drug Monit*. 2000; 22:537–44.  
<https://doi.org/10.1097/00007691-200010000-00006>
  110. Mannick JB, Del Giudice G, Lattanzi M, Valiante NM, Praestgaard J, Huang B, Lonetto MA, Maecker HT, Kovarik J, Carson S, Glass DJ, Klickstein LB. mTOR inhibition improves immune function in the elderly. *Sci Transl Med*. 2014; 6:268ra179.  
<https://doi.org/10.1126/scitranslmed.3009892>
  111. Piccart M, Hortobagyi GN, Campone M, Pritchard KI, Lebrun F, Ito Y, Noguchi S, Perez A, Rugo HS, Deleu I, Burris HA 3rd, Provencher L, Neven P, et al. Everolimus plus exemestane for hormone-receptor-positive, human epidermal growth factor receptor-2-negative advanced breast cancer: overall survival results from BOLERO-2. *Ann Oncol*. 2014; 25:2357–62. <https://doi.org/10.1093/annonc/mdu456>
  112. Kraig E, Linehan LA, Liang H, Romo TQ, Liu Q, Wu Y, Benavides AD, Curiel TJ, Javors MA, Musi N, Chiodo L, Koek W, Gelfond JA, Kellogg DL Jr. A randomized control trial to establish the feasibility and safety of rapamycin treatment in an older human cohort: Immunological, physical performance, and cognitive effects. *Exp Gerontol*. 2018; 105:53–69.  
<https://doi.org/10.1016/j.exger.2017.12.026>
  113. Kaeberlein M. Rapamycin and ageing: when, for how long, and how much? *J Genet Genomics*. 2014; 41:459–63.  
<https://doi.org/10.1016/j.jgg.2014.06.009>
  114. Romero R, Erez O, Hüttemann M, Maymon E, Panaitescu B, Conde-Agudelo A, Pacora P, Yoon BH, Grossman LI. Metformin, the aspirin of the 21st century: its role in gestational diabetes mellitus, prevention of preeclampsia and cancer, and the promotion of longevity. *Am J Obstet Gynecol*. 2017; 217:282–302.  
<https://doi.org/10.1016/j.ajog.2017.06.003>
  115. Goldberg RB, Aroda VR, Bluemke DA, Barrett-Connor E, Budoff M, Crandall JP, Dabelea D, Horton ES, Mather KJ, Orchard TJ, Schade D, Watson K, Temprosa M, and Diabetes Prevention Program Research Group. Effect of Long-Term Metformin and Lifestyle in the Diabetes Prevention Program and Its Outcome Study on Coronary Artery Calcium. *Circulation*. 2017; 136:52–64.  
<https://doi.org/10.1161/CIRCULATIONAHA.116.025483>
  116. Pollak MN. Investigating metformin for cancer prevention and treatment: the end of the beginning. *Cancer Discov*. 2012; 2:778–90.  
<https://doi.org/10.1158/2159-8290.CD-12-0263>
  117. Anisimov VN. Metformin for cancer and aging prevention: is it a time to make the long story short? *Oncotarget*. 2015; 6:39398–407.  
<https://doi.org/10.18632/oncotarget.6347>
  118. Heckman-Stoddard BM, DeCensi A, Sahasrabudhe VV, Ford LG. Repurposing metformin for the prevention of cancer and cancer recurrence. *Diabetologia*. 2017; 60:1639–47.  
<https://doi.org/10.1007/s00125-017-4372-6>
  119. Haukka J, Niskanen L, Auvinen A. Risk of Cause-Specific Death in Individuals with Cancer-Modifying Role Diabetes, Statins and Metformin. *Int J Cancer*. 2017; 141:2437–49.



<https://doi.org/10.1002/ijc.31016>

120. Gosmanova EO, Canada RB, Mangold TA, Rawls WN, Wall BM. Effect of metformin-containing antidiabetic regimens on all-cause mortality in veterans with type 2 diabetes mellitus. *Am J Med Sci*. 2008; 336:241–47. <https://doi.org/10.1097/MAJ.0b013e31816250e6>
121. Anisimov VN, Berstein LM, Egormin PA, Piskunova TS, Popovich IG, Zabezhinski MA, Tyndyk ML, Yurova MV, Kovalenko IG, Poroshina TE, Semenchenko AV. Metformin slows down aging and extends life span of female SHR mice. *Cell Cycle*. 2008; 7:2769–73. <https://doi.org/10.4161/cc.7.17.6625>
122. Anisimov VN, Berstein LM, Popovich IG, Zabezhinski MA, Egormin PA, Piskunova TS, Semenchenko AV, Tyndyk ML, Yurova MN, Kovalenko IG, Poroshina TE. If started early in life, metformin treatment increases life span and postpones tumors in female SHR mice. *Aging (Albany NY)*. 2011; 3:148–57. <https://doi.org/10.18632/aging.100273>
123. Martin-Montalvo A, Mercken EM, Mitchell SJ, Palacios HH, Mote PL, Scheibye-Knudsen M, Gomes AP, Ward TM, Minor RK, Blouin MJ, Schwab M, Pollak M, Zhang Y, et al. Metformin improves healthspan and lifespan in mice. *Nat Commun*. 2013; 4:2192. <https://doi.org/10.1038/ncomms3192>
124. Cabreiro F, Au C, Leung KY, Vergara-Irigaray N, Cochemé HM, Noori T, Weinkove D, Schuster E, Greene ND, Gems D. Metformin retards aging in *C. elegans* by altering microbial folate and methionine metabolism. *Cell*. 2013; 153:228–39. <https://doi.org/10.1016/j.cell.2013.02.035>
125. Wu L, Zhou B, Oshiro-Rapley N, Li M, Paulo JA, Webster CM, Mou F, Kacergis MC, Talkowski ME, Carr CE, Gygi SP, Zheng B, Soukas AA. An Ancient, Unified Mechanism for Metformin Growth Inhibition in *C. elegans* and Cancer. *Cell*. 2016; 167:1705–1718.e13. <https://doi.org/10.1016/j.cell.2016.11.055>
126. Chen J, Ou Y, Li Y, Hu S, Shao LW, Liu Y. Metformin extends *C. elegans* lifespan through lysosomal pathway. *eLife*. 2017; 6:6. <https://doi.org/10.7554/eLife.31268>
127. De Haes W, Frooninckx L, Van Assche R, Smolders A, Depuydt G, Billen J, Braeckman BP, Schoofs L, Temmerman L. Metformin promotes lifespan through mitohormesis via the peroxiredoxin PRDX-2. *Proc Natl Acad Sci USA*. 2014; 111:E2501–09. <https://doi.org/10.1073/pnas.1321776111>
128. Anisimov VN. Metformin for aging and cancer prevention. *Aging (Albany NY)*. 2010; 2:760–74. <https://doi.org/10.18632/aging.100230>
129. Anisimov VN. Metformin: do we finally have an anti-aging drug? *Cell Cycle*. 2013; 12:3483–89. <https://doi.org/10.4161/cc.26928>
130. Pietrocola F, Kroemer G. Metformin: a metabolic modulator. *Oncotarget*. 2017; 8:9017–20. <https://doi.org/10.18632/oncotarget.14794>
131. Weiss R, Fernandez E, Liu Y, Strong R, Salmon AB. Metformin reduces glucose intolerance caused by rapamycin treatment in genetically heterogeneous female mice. *Aging (Albany NY)*. 2018; 10: 386–401. <https://doi.org/10.18632/aging.101401>
132. Santos EL, de Picoli Souza K, da Silva ED, Batista EC, Martins PJ, D’Almeida V, Pesquero JB. Long term treatment with ACE inhibitor enalapril decreases body weight gain and increases life span in rats. *Biochem Pharmacol*. 2009; 78:951–58. <https://doi.org/10.1016/j.bcp.2009.06.018>
133. Spindler SR, Mote PL, Flegal JM. Combined statin and angiotensin-converting enzyme (ACE) inhibitor treatment increases the lifespan of long-lived F1 male mice. *Age (Dordr)*. 2016; 38:379–91. <https://doi.org/10.1007/s11357-016-9948-4>
134. Basso N, Cini R, Pietrelli A, Ferder L, Terragno NA, Inserra F. Protective effect of long-term angiotensin II inhibition. *Am J Physiol Heart Circ Physiol*. 2007; 293:H1351–58. <https://doi.org/10.1152/ajpheart.00393.2007>
135. Bibbins-Domingo K, Grossman DC, Curry SJ, Davidson KW, Epling JW Jr, García FA, Gillman MW, Kemper AR, Krist AH, Kurth AE, Landefeld CS, LeFevre ML, Mangione CM, et al, and US Preventive Services Task Force. Statin Use for the Primary Prevention of Cardiovascular Disease in Adults: US Preventive Services Task Force Recommendation Statement. *JAMA*. 2016; 316:1997–2007. <https://doi.org/10.1001/jama.2016.15450>
136. Spindler SR, Mote PL, Li R, Dhahbi JM, Yamakawa A, Flegal JM, Jeske DR, Li R, Lublin AL.  $\beta$ 1-Adrenergic receptor blockade extends the life span of *Drosophila* and long-lived mice. *Age (Dordr)*. 2013; 35:2099–109. <https://doi.org/10.1007/s11357-012-9498-3>
137. Lafeber M, Spiering W, van der Graaf Y, Nathoe H, Bots ML, Grobbee DE, Visseren FL. The combined use of aspirin, a statin, and blood pressure-lowering agents (polypill components) and the risk of vascular morbidity and mortality in patients with coronary artery disease. *Am Heart J*. 2013; 166:282–289.e1. <https://doi.org/10.1016/j.ahj.2013.04.011>
138. Patel A, Cass A, Peiris D, Usherwood T, Brown A, Jan S, Neal B, Hillis GS, Rafter N, Tonkin A, Webster R, Billot L, Bompont S, et al, and Kanyini Guidelines

Adherence with the Polypill (Kanyini GAP) Collaboration. A pragmatic randomized trial of a polypill-based strategy to improve use of indicated preventive treatments in people at high cardiovascular disease risk. *Eur J Prev Cardiol.* 2015; 22:920–30.

<https://doi.org/10.1177/2047487314530382>

139. Brainin M, Feigin V, Martins S, Matz K, Roy J, Sandercock P, Teuschl Y, Tuomilehto J, Wiseman A. Cut stroke in half: polypill for primary prevention in stroke. *Int J Stroke.* 2018; 13:633–47.  
<https://doi.org/10.1177/1747493018761190>
140. Gronich N, Rennert G. Beyond aspirin-cancer prevention with statins, metformin and bisphosphonates. *Nat Rev Clin Oncol.* 2013; 10:625–42. <https://doi.org/10.1038/nrclinonc.2013.169>
141. Holmes MD, Chen WY. Hiding in plain view: the potential for commonly used drugs to reduce breast cancer mortality. *Breast Cancer Res.* 2012; 14:216.  
<https://doi.org/10.1186/bcr3336>
142. Kedika R, Patel M, Pena Sahdala HN, Mahgoub A, Cipher D, Siddiqui AA. Long-term use of angiotensin converting enzyme inhibitors is associated with decreased incidence of advanced adenomatous colon polyps. *J Clin Gastroenterol.* 2011; 45:e12–16.  
<https://doi.org/10.1097/MCG.0b013e3181ea1044>
143. Powe DG, Voss MJ, Zänker KS, Habashy HO, Green AR, Ellis IO, Entschladen F. Beta-blocker drug therapy reduces secondary cancer formation in breast cancer and improves cancer specific survival. *Oncotarget.* 2010; 1:628–38.  
<https://doi.org/10.18632/oncotarget.101009>
144. Barron TI, Connolly RM, Sharp L, Bennett K, Visvanathan K. Beta blockers and breast cancer mortality: a population- based study. *J Clin Oncol.* 2011; 29:2635–44.  
<https://doi.org/10.1200/JCO.2010.33.5422>
145. Thorat MA, Cuzick J. Role of aspirin in cancer prevention. *Curr Oncol Rep.* 2013; 15:533–40.  
<https://doi.org/10.1007/s11912-013-0351-3>
146. Blagosklonny MV. Prevention of cancer by inhibiting aging. *Cancer Biol Ther.* 2008; 7:1520–24.  
<https://doi.org/10.4161/cbt.7.10.6663>
147. Blagosklonny MV. Prospective treatment of age-related diseases by slowing down aging. *Am J Pathol.* 2012; 181:1142–46.  
<https://doi.org/10.1016/j.ajpath.2012.06.024>

## Paradoxes of senolytics

Mikhail V. Blagosklonny

Senolytics are drugs that extend lifespan and delay some age-related diseases by killing senescent cells [1-4]. In fact, drug screens have identified a diverse group of drugs that are preferentially toxic to at least some senescent cells in some cellular models [2-9]. So far, however, their selectivity against senescent cells is modest and cell-type-specific [8-11]. Nevertheless, targeting senescent cells has been shown in animal models to prevent such age-related pathologies as emphysema [12], lung fibrosis [13-15], atherosclerosis [16, 17], osteoporosis [18], osteoarthritis [19-20], renal disease [21], intervertebral disk pathology [2], hepatic steatosis [22] and other age-related conditions [4, 7, 18, 23, 24].

In this editorial commentary, I want to draw your attention to the paradoxes associated with senolytics, which argue against the dogma that says aging is a functional decline caused by molecular damage. This dogma predicts that senolytics should accelerate aging. If aging is caused by loss of function, then killing senescent cells would be expected to accelerate aging, given that dead cells have no functionality at all. Instead, however, senolytics slow aging, which highlights a contradiction in the prevailing dogma.

The theory of hyperfunctional aging [25-32] addresses this paradox. Killing senescent cells is beneficial because senescent cells are hyperfunctional [33]. The hypersecretory phenotype or Senescence-Associated Secretory Phenotype (SASP) is the best-known example of universal hyperfunction [34-36]. Most such hyperfunctions are tissue-specific. For example, senescent beta cells overproduce insulin [37] and thus activate mTOR in hepatocytes, adipocytes and other cells, causing their hyperfunction, which in turn leads to metabolic syndrome (obesity, hypertension, hyperlipidemia and hyperglycemia) and is also a risk factor for cancer [38-40]. SASP, hyperinsulinemia and obesity, hypertension, hyperlipidemia and hyperglycemia are all examples of absolute hyperfunction (an increase in functionality). In comparison, relative hyperfunction is an insufficient decrease of unneeded function. For example, protein synthesis decreases with aging, but that decrease is not sufficient [30]. In analogy, a car moving on the highway at 65 mph is not “hyperfunctional.” But if the car were to exit the highway and enter a residential driveway at only 60 mph it would be “hyperfunctional,” and stopping that car would likely prevent damage to other objects.

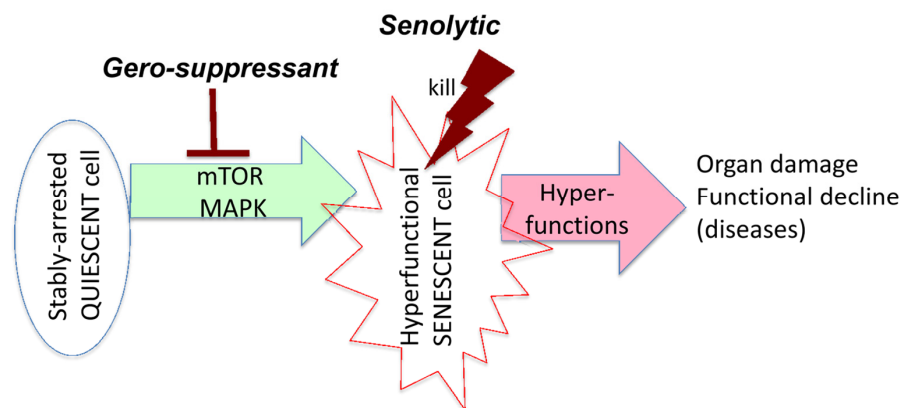

**Figure 1. Target of senolytics in the aging quasi-program.** In post-mitotic quiescent cells in an organism, growth-promoting effectors such as mTOR drive conversion to senescence. Hyperfunctional senescent cells activate other cells (including cells in distant organs), rendering them also hyperfunctional, which eventually leads to organ damage. This process manifests as functional decline, a terminal event secondary to initial hyperfunction. Senolytics such as ABT263 or 737 kill hyperfunctional senescent cells, preventing damage to organs. Gerosuppressants such as rapamycin suppress geroconversion and may decrease hyperfunction of already senescent cells, thereby slowing disease progression (not shown here in scheme).

Similarly, killing hyperfunctional cells can prevent organismal damage. Senolytics eliminate hyperfunctional cells, which otherwise damage organs (Figure 1).

Senolytics should not be confused with gerosuppressants (Figure 1). Gerosuppressants, such as rapamycin, do not kill cells; they instead prevent cellular conversion to senescence (geroconversion) [33]. Rapamycin also slows disease progression by limiting the hyperfunction of senescent cells. Notably, some senolytics are also gerosuppressants. For example, inhibitors of MEK [41-43] or PI3K [2, 41] are both gerosuppressants [41] and senolytics [2, 42, 43].

It may seem paradoxical that senolytics are anticancer drugs [44] because standard anticancer agents cause molecular damage. According to the hyperfunction theory [45], molecular damage does not cause aging. Although accumulation of molecular damage does happen and would destroy the organism eventually, no organism lives long enough for that to occur because TOR-driven (hyperfunctional) aging kills it first. If TOR-driven aging (i.e., aging as we currently know it) were abolished, then organisms would die from “post-aging syndrome” due to molecular damage (see Figure 8 in ref. [25]). Molecular damage contributes to some age-related diseases. But these diseases would arise even without molecular damage [45]. Molecular damage is essential for most types of cancer, but a senescent microenvironment [46] and overall organism aging (and associated diseases such as diabetes) also play roles [47], as does clonal selection for mTOR activation in cancer cells [48]. Importantly, molecular damage renders cancer cells robust and hyperfunctional. Cancer cells kill an organism not because molecular damage makes them weak; it is because the molecular damage makes them robust and hyperfunctional. If accumulation of molecular damage leads to immortalization and robustness, then aging cannot represent functional decline caused by molecular damage [48].

All senolytics, without exception, were initially investigated or specifically developed as anticancer drugs. But not all anticancer drugs are senolytics. Both senolytics and gerosuppressants belong to a very special subgroup of oncotargeted drugs [49]. Various pathways involving IGF-1, Ras, MEK, AMPK, TSC1/2, FOXO, PI3K, mTOR, S6K, and NFκB comprise a mTOR-related network and are involved in aging [49]. Oncoproteins promote aging, while tumor suppressors are gerosuppressors, which inhibit aging [48, 50]. As depicted a decade ago (see Figure 3 in ref. [51] and Figures 4 and 9 in ref. [25]), oncotargets are gerotargets that are also mTOR activators, while tumor and aging suppressors are mTOR inhibitors. In brief, geroconversion and oncogenic transformation are two sides of the same process [50]. Gerogenic oncogenes activate

the mTOR pathway, driving geroconversion of cell cycle-arrested cells. When cell cycle control is disabled, they drive oncogenic transformation [48, 50]. Many puzzles remain. For example, killing senescent adipocytes, macrophages or foam cells will slow diseases such as atherosclerosis and metabolic diseases, and killing senescent glial cells can prevent cognitive decline [23]. On the other hand, killing some senescent cell types may be counterproductive. For example, killing senescent beta cells may lead to diabetes [37], and killing of senescent hyperfunctional neurons in Alzheimer’s disease may have unpredictable consequences. Fortunately, senolytics are tissue-specific and only kill some types of senescent cells [8-11], which may make them safer.

To add further complication to the paradoxes associated with senolytics, it was shown that many detected p16/β-gal-positive cells are not senescent cells, but are instead hyperfunctional macrophages, which contribute to aging [52-54]. Notably, β-gal staining is a marker of hyperfunctional lysosomes [55]. A combination of markers, including mTOR targets, is needed to define senescence [33]. Some senolytics that target Bcl2 family proteins may theoretically kill leukemia/lymphoma cells. I hope to discuss these and other issues in a scheduled review “Senolytics, gerosuppressants and conventional life-extending drugs.”

## CONFLICTS OF INTEREST

The author declares no conflicts of interest.

## REFERENCES

1. Kirkland JL, Tchkonja T. Clinical strategies and animal models for developing senolytic agents. *Exp Gerontol*. 2015; 68:19–25. <https://doi.org/10.1016/j.exger.2014.10.012>
2. Zhu Y, Tchkonja T, Pirtskhalava T, Gower AC, Ding H, Giorgadze N, Palmer AK, Ikeno Y, Hubbard GB, Lenburg M, O’Hara SP, LaRusso NF, Miller JD, et al. The Achilles’ heel of senescent cells: from transcriptome to senolytic drugs. *Aging Cell*. 2015; 14:644–58. <https://doi.org/10.1111/acer.12344>
3. Kirkland JL, Tchkonja T, Zhu Y, Niedernhofer LJ, Robbins PD. The Clinical Potential of Senolytic Drugs. *J Am Geriatr Soc*. 2017; 65:2297–301. <https://doi.org/10.1111/jgs.14969>
4. Xu M, Pirtskhalava T, Farr JN, Weigand BM, Palmer AK, Weivoda MM, Inman CL, Ogronik MB, Hachfeld CM, Fraser DG, Onken JL, Johnson KO, Verza GC, et al. Senolytics improve physical function and increase lifespan in old age. *Nat Med*. 2018; 24:1246–56. <https://doi.org/10.1038/s41591-018-0092-9>

5. Chang J, Wang Y, Shao L, Laberge RM, Demaria M, Campisi J, Janakiraman K, Sharpless NE, Ding S, Feng W, Luo Y, Wang X, Aykin-Burns N, et al. Clearance of senescent cells by ABT263 rejuvenates aged hematopoietic stem cells in mice. *Nat Med*. 2016; 22:78–83. <https://doi.org/10.1038/nm.4010>
6. Wang Y, Chang J, Liu X, Zhang X, Zhang S, Zhang X, Zhou D, Zheng G. Discovery of piperlongumine as a potential novel lead for the development of senolytic agents. *Aging (Albany NY)*. 2016; 8:2915–26. <https://doi.org/10.18632/aging.101100>
7. Fuhrmann-Stroissnigg H, Ling YY, Zhao J, McGowan SJ, Zhu Y, Brooks RW, Grassi D, Gregg SQ, Stripay JL, Dorronsoro A, Corbo L, Tang P, Bukata C, et al. Identification of HSP90 inhibitors as a novel class of senolytics. *Nat Commun*. 2017; 8:422. <https://doi.org/10.1038/s41467-017-00314-z>
8. Zhu Y, Tchkonja T, Fuhrmann-Stroissnigg H, Dai HM, Ling YY, Stout MB, Pirtskhalava T, Giorgadze N, Johnson KO, Giles CB, Wren JD, Niedernhofer LJ, Robbins PD, Kirkland JL. Identification of a novel senolytic agent, navitoclax, targeting the Bcl-2 family of anti-apoptotic factors. *Aging Cell*. 2016; 15:428–35. <https://doi.org/10.1111/ace1.12445>
9. Zhu Y, Doornebal EJ, Pirtskhalava T, Giorgadze N, Wentworth M, Fuhrmann-Stroissnigg H, Niedernhofer LJ, Robbins PD, Tchkonja T, Kirkland JL. New agents that target senescent cells: the flavone, fisetin, and the BCL-XL inhibitors, A1331852 and A1155463. *Aging (Albany NY)*. 2017; 9:955–63. <https://doi.org/10.18632/aging.101202>
10. Grezella C, Fernandez-Rebollo E, Franzen J, Ventura Ferreira MS, Beier F, Wagner W. Effects of senolytic drugs on human mesenchymal stromal cells. *Stem Cell Res Ther*. 2018; 9:108. <https://doi.org/10.1186/s13287-018-0857-6>
11. Hwang HV, Tran DT, Rebuffatti MN, Li CS, Knowlton AA. Investigation of quercetin and hyperoside as senolytics in adult human endothelial cells. *PLoS One*. 2018; 13:e0190374. <https://doi.org/10.1371/journal.pone.0190374>
12. Mikawa R, Suzuki Y, Baskoro H, Kanayama K, Sugimoto K, Sato T, Sugimoto M. Elimination of p19ARF -expressing cells protects against pulmonary emphysema in mice. *Aging Cell*. 2018; 17:e12827. <https://doi.org/10.1111/ace1.12827>
13. Lehmann M, Korfei M, Mutze K, Klee S, Skronska-Wasek W, Alsafadi HN, Ota C, Costa R, Schiller HB, Lindner M, Wagner DE, Günther A, Königshoff M. Senolytic drugs target alveolar epithelial cell function and attenuate experimental lung fibrosis ex vivo. *Eur Respir J*. 2017; 50:1602367. <https://doi.org/10.1183/13993003.02367-2016>
14. Pan J, Li D, Xu Y, Zhang J, Wang Y, Chen M, Lin S, Huang L, Chung EJ, Citrin DE, Wang Y, Hauer-Jensen M, Zhou D, Meng A. Inhibition of Bcl-2/xl With ABT-263 Selectively Kills Senescent Type II Pneumocytes and Reverses Persistent Pulmonary Fibrosis Induced by Ionizing Radiation in Mice. *Int J Radiat Oncol Biol Phys*. 2017; 99:353–61. <https://doi.org/10.1016/j.ijrobp.2017.02.216>
15. Schafer MJ, White TA, Iijima K, Haak AJ, Ligresti G, Atkinson EJ, Oberg AL, Birch J, Salmonowicz H, Zhu Y, Mazula DL, Brooks RW, Fuhrmann-Stroissnigg H, et al. Cellular senescence mediates fibrotic pulmonary disease. *Nat Commun*. 2017; 8:14532. <https://doi.org/10.1038/ncomms14532>
16. Childs BG, Baker DJ, Wijshake T, Conover CA, Campisi J, van Deursen JM. Senescent intimal foam cells are deleterious at all stages of atherosclerosis. *Science*. 2016; 354:472–77. <https://doi.org/10.1126/science.aaf6659>
17. Roos CM, Zhang B, Palmer AK, Ogrodnik MB, Pirtskhalava T, Thalji NM, Hagler M, Jurk D, Smith LA, Casacalang-Verzosa G, Zhu Y, Schafer MJ, Tchkonja T, et al. Chronic senolytic treatment alleviates established vasomotor dysfunction in aged or atherosclerotic mice. *Aging Cell*. 2016; 15:973–77. <https://doi.org/10.1111/ace1.12458>
18. Farr JN, Xu M, Weivoda MM, Monroe DG, Fraser DG, Onken JL, Negley BA, Sfeir JG, Ogrodnik MB, Hachfeld CM, LeBrasseur NK, Drake MT, Pignolo RJ, et al. Targeting cellular senescence prevents age-related bone loss in mice. *Nat Med*. 2017; 23:1072–79. <https://doi.org/10.1038/nm.4385>
19. Jeon OH, Kim C, Laberge RM, Demaria M, Rathod S, Vasserot AP, Chung JW, Kim DH, Poon Y, David N, Baker DJ, van Deursen JM, Campisi J, Elisseeff JH. Local clearance of senescent cells attenuates the development of post-traumatic osteoarthritis and creates a pro-regenerative environment. *Nat Med*. 2017; 23:775–81. <https://doi.org/10.1038/nm.4324>
20. Xu M, Bradley EW, Weivoda MM, Hwang SM, Pirtskhalava T, Decklever T, Curran GL, Ogrodnik M, Jurk D, Johnson KO, Lowe V, Tchkonja T, Westendorf JJ, Kirkland JL. Transplanted Senescent Cells Induce an Osteoarthritis-Like Condition in Mice. *J Gerontol A Biol Sci Med Sci*. 2017; 72:780–85.
21. Valentijn FA, Falke LL, Nguyen TQ, Goldschmeding R. Cellular senescence in the aging and diseased kidney. *J Cell Commun Signal*. 2018; 12:69–82. <https://doi.org/10.1007/s12079-017-0434-2>
22. Ogrodnik M, Miwa S, Tchkonja T, Tiniakos D, Wilson CL, Lahat A, Day CP, Burt A, Palmer A, Anstee QM,



- Grellscheid SN, Hoeijmakers JH, Barnhoorn S, et al. Cellular senescence drives age-dependent hepatic steatosis. *Nat Commun*. 2017; 8:15691. <https://doi.org/10.1038/ncomms15691>
23. Bussian TJ, Aziz A, Meyer CF, Swenson BL, van Deursen JM, Baker DJ. Clearance of senescent glial cells prevents tau-dependent pathology and cognitive decline. *Nature*. 2018; 562:578–82. <https://doi.org/10.1038/s41586-018-0543-y>
  24. Schafer MJ, Haak AJ, Tschumperlin DJ, LeBrasseur NK. Targeting Senescent Cells in Fibrosis: Pathology, Paradox, and Practical Considerations. *Curr Rheumatol Rep*. 2018; 20:3. <https://doi.org/10.1007/s11926-018-0712-x>
  25. Blagosklonny MV. Aging and immortality: quasi-programmed senescence and its pharmacologic inhibition. *Cell Cycle*. 2006; 5:2087–102. <https://doi.org/10.4161/cc.5.18.3288>
  26. Blagosklonny MV. TOR-driven aging: speeding car without brakes. *Cell Cycle*. 2009; 8:4055–59. <https://doi.org/10.4161/cc.8.24.10310>
  27. Gems D, de la Guardia Y. Alternative Perspectives on Aging in *Caenorhabditis elegans*: Reactive Oxygen Species or Hyperfunction? *Antioxid Redox Signal*. 2013; 19:321–29. <https://doi.org/10.1089/ars.2012.4840>
  28. Gems D, Partridge L. Genetics of longevity in model organisms: debates and paradigm shifts. *Annu Rev Physiol*. 2013; 75:621–44. <https://doi.org/10.1146/annurev-physiol-030212-183712>
  29. de la Guardia Y, Gilliat AF, Hellberg J, Rennert P, Cabreiro F, Gems D. Run-on of germline apoptosis promotes gonad senescence in *C. elegans*. *Oncotarget*. 2016; 7:39082–96. <https://doi.org/10.18632/oncotarget.9681>
  30. Dhondt I, Petyuk VA, Cai H, Vandemeulebroucke L, Vierstraete A, Smith RD, Depuydt G, Braeckman BP. FOXO/DAF-16 Activation Slows Down Turnover of the Majority of Proteins in *C. elegans*. *Cell Reports*. 2016; 16:3028–40. <https://doi.org/10.1016/j.celrep.2016.07.088>
  31. Wang H, Zhao Y, Ezcurra M, Benedetto A, Gilliat AF, Hellberg J, Ren Z, Galimov ER, Athigapanich T, Girstmair J, Telford MJ, Dolphin CT, Zhang Z, Gems D. A parthenogenetic quasi-program causes teratoma-like tumors during aging in wild-type *C. elegans*. *NPJ Aging Mech Dis*. 2018; 4:6. <https://doi.org/10.1038/s41514-018-0025-3>
  32. Scialò F, Sriram A, Naudí A, Ayala V, Jové M, Pamplona R, Sanz A. Target of rapamycin activation predicts lifespan in fruit flies. *Cell Cycle*. 2015; 14:2949–58. <https://doi.org/10.1080/15384101.2015.1071745>
  33. Blagosklonny MV. Rapamycin, proliferation and geroconversion to senescence. *Cell Cycle*. 2018; 1–11. <https://doi.org/10.1080/15384101.2018.1554781>
  34. Freund A, Patil CK, Campisi J. p38MAPK is a novel DNA damage response-independent regulator of the senescence-associated secretory phenotype. *EMBO J*. 2011; 30:1536–48. <https://doi.org/10.1038/emboj.2011.69>
  35. Laberge RM, Sun Y, Orjalo AV, Patil CK, Freund A, Zhou L, Curran SC, Davalos AR, Wilson-Edell KA, Liu S, Limbad C, Demaria M, Li P, et al. MTOR regulates the pro-tumorigenic senescence-associated secretory phenotype by promoting IL1A translation. *Nat Cell Biol*. 2015; 17:1049–61. <https://doi.org/10.1038/ncb3195>
  36. Christy B, Demaria M, Campisi J, Huang J, Jones D, Dodds SG, Williams C, Hubbard G, Livi CB, Gao X, Weintraub S, Curiel T, Sharp ZD, Hastay P. p53 and rapamycin are additive. *Oncotarget*. 2015; 6:15802–13. <https://doi.org/10.18632/oncotarget.4602>
  37. Helman A, Klochendler A, Azazmeh N, Gabai Y, Horwitz E, Anzi S, Swisa A, Condiotti R, Granit RZ, Nevo Y, Fixler Y, Shreibman D, Zamir A, et al. p16(Ink4a)-induced senescence of pancreatic beta cells enhances insulin secretion. *Nat Med*. 2016; 22:412–20. <https://doi.org/10.1038/nm.4054>
  38. Guo S. Insulin signaling, resistance, and the metabolic syndrome: insights from mouse models into disease mechanisms. *J Endocrinol*. 2014; 220:T1–23. <https://doi.org/10.1530/JOE-13-0584>
  39. Extermann M. Metabolic syndrome, aging, and cancer. *Crit Rev Oncog*. 2013; 18:515–29. <https://doi.org/10.1615/CritRevOncog.2014010612>
  40. Blagosklonny MV. TOR-centric view on insulin resistance and diabetic complications: perspective for endocrinologists and gerontologists. *Cell Death Dis*. 2013; 4:e964. <https://doi.org/10.1038/cddis.2013.506>
  41. Demidenko ZN, Shtutman M, Blagosklonny MV. Pharmacologic inhibition of MEK and PI-3K converges on the mTOR/S6 pathway to decelerate cellular senescence. *Cell Cycle*. 2009; 8:1896–900. <https://doi.org/10.4161/cc.8.12.8809>
  42. Kochetkova EY, Blinova GI, Bystrova OA, Martynova MG, Pospelov VA, Pospelova TV. Targeted elimination of senescent Ras-transformed cells by suppression of MEK/ERK pathway. *Aging (Albany NY)*. 2017; 9:2352–75. <https://doi.org/10.18632/aging.101325>

43. Kochetkova EY, Blinova GI, Bystrova OA, Martynova MG, Pospelov VA, Pospelova TV. Suppression of mTORC1 activity in senescent Ras-transformed cells neither restores autophagy nor abrogates apoptotic death caused by inhibition of MEK/ERK kinases. *Aging* (Albany NY). 2018; 10:3574–89.  
<https://doi.org/10.18632/aging.101686>
44. Slack C, Alic N, Partridge L. Could cancer drugs provide ammunition against aging? *Cell Cycle*. 2016; 15:153–55.  
<https://doi.org/10.1080/15384101.2015.1118905>
45. Blagosklonny MV. Answering the ultimate question “what is the proximal cause of aging?”. *Aging* (Albany NY). 2012; 4:861–77.  
<https://doi.org/10.18632/aging.100525>
46. Velarde MC, Demaria M, Campisi J. Senescent cells and their secretory phenotype as targets for cancer therapy. *Interdiscip Top Gerontol*. 2013; 38:17–27.  
<https://doi.org/10.1159/000343572>
47. Blagosklonny MV. Prevention of cancer by inhibiting aging. *Cancer Biol Ther*. 2008; 7:1520–24.  
<https://doi.org/10.4161/cbt.7.10.6663>
48. Blagosklonny MV. Molecular damage in cancer: an argument for mTOR-driven aging. *Aging* (Albany NY). 2011; 3:1130–41.  
<https://doi.org/10.18632/aging.100422>
49. Blagosklonny MV. Selective anti-cancer agents as anti-aging drugs. *Cancer Biol Ther*. 2013; 14:1092–97.  
<https://doi.org/10.4161/cbt.27350>
50. Blagosklonny MV. Cell cycle arrest is not yet senescence, which is not just cell cycle arrest: terminology for TOR-driven aging. *Aging* (Albany NY). 2012; 4:159–65.  
<https://doi.org/10.18632/aging.100443>
51. Blagosklonny MV. Aging: ROS or TOR. *Cell Cycle*. 2008; 7:3344–54.  
<https://doi.org/10.4161/cc.7.21.6965>
52. Hall BM, Balan V, Gleiberman AS, Strom E, Krasnov P, Virtuoso LP, Rydkina E, Vujcic S, Balan K, Gitlin I, Leonova K, Polinsky A, Chernova OB, Gudkov AV. Aging of mice is associated with p16(Ink4a)- and  $\beta$ -galactosidase-positive macrophage accumulation that can be induced in young mice by senescent cells. *Aging* (Albany NY). 2016; 8:1294–315.  
<https://doi.org/10.18632/aging.100991>
53. Frescas D, Hall BM, Strom E, Virtuoso LP, Gupta M, Gleiberman AS, Rydkina E, Balan V, Vujcic S, Chernova OB, Gudkov AV. Murine mesenchymal cells that express elevated levels of the CDK inhibitor p16(Ink4a) in vivo are not necessarily senescent. *Cell Cycle*. 2017; 16:1526–33.  
<https://doi.org/10.1080/15384101.2017.1339850>
54. Hall BM, Balan V, Gleiberman AS, Strom E, Krasnov P, Virtuoso LP, Rydkina E, Vujcic S, Balan K, Gitlin I, Leonova KI, Consiglio CR, Gollnick SO, et al. p16(Ink4a) and senescence-associated  $\beta$ -galactosidase can be induced in macrophages as part of a reversible response to physiological stimuli. *Aging* (Albany NY). 2017; 9:1867–84.  
<https://doi.org/10.18632/aging.101268>
55. Kurz DJ, Decary S, Hong Y, Erusalimsky JD. Senescence-associated (beta)-galactosidase reflects an increase in lysosomal mass during replicative ageing of human endothelial cells. *J Cell Sci*. 2000; 113:3613–22.

**Mikhail V. Blagosklonny:** Cell Stress Biology, Roswell Park Cancer Institute, Buffalo, NY 14263, USA

**Correspondence:** Mikhail V. Blagosklonny

**Email:** [Blagosklonny@rapalogs.com](mailto:Blagosklonny@rapalogs.com)

**Keywords:** senescence, cancer, diseases, senolytic, mTOR, gerosuppressants

**Conflicts of Interest:** The author declares no conflicts of interest

**Copyright:** Blagosklonny. This is an open-access article distributed under the terms of the Creative Commons Attribution License (CC BY 3.0), which permits unrestricted use, distribution, and reproduction in any medium, provided the original author and source are credited

**Received:** December 24, 2018

**Published:** December 28, 2018
